# Supplementary material for: Salivary proteome of a Neotropical primate: potential roles in host defense and oral food perception
Source: PeerJ. 2020 Jul 22;8:e9489. doi: 10.7717/peerj.9489 (PMC7382365; doi:10.7717/peerj.9489)
Supplement: Supplemental Information 2 — Contains details of identified proteins (Description, Accession number, Matching species, MW [kDa], Coverage, Score Mascot, # Peptides, Sequence, Confidence, Master Protein Accessions, Modifications) and the results of the analysis of David enrichemnt_clustering, SignalP-4.1 euk prediction, and transmembrane helices domains (TMHMM). [file peerj-08-9489-s002.xlsx]

## Sheet: Table S1
Table S1. Salivary proteins identified in the whole saliva of the Neotropical black howler monkey Alouatta pigra (MS/MS).
Protein name	UniProtKB Accession number	Matching species	Molecular mass (kDa)	Sequence coverage (%)	Mascot score	Matched peptides	Gel band reference
78 kDa glucose-regulated protein	P11021	Homo sapiens	72.288	51	587	29	a-c
Actin gamma 1	F6TII3	Macaca mulatta	42.276	6	32	1	k-m
Alcohol dehydrogenase class 4 mu/sigma chain	P40394	Homo sapiens	41.454	11	55	1	d
Aldehyde dehydrogenase	F7C1B5	Macaca mulatta	57.546	2	44	1	a-c
Aldehyde dehydrogenase, dimeric NADP-preferring	P30838	Homo sapiens	50.363	18	118	5	a-c
Aldo-keto reductase family 1 member B10	O60218	Homo sapiens	35.997	3	55	1	e
Alpha-enolase	P06733	Homo sapiens	47.139	43	350	12	a-c
Aminopeptidase	P15144	Homo sapiens	109.471	5	105	4	a-c
Antithrombin-III	P01008	Homo sapiens	52.569	7	42	2	a-c
Beta-2-microglobulin	O77523	Alouatta seniculus	13.687	8	39	1	g
Beta-defensin 1	Q95M66	Saguinus oedipus	7.417	1	51	1	i
Bifunctional purine biosynthesis protein PURH	P31939	Homo sapiens	64.575	9	55	3	a-c
Biotinidase	P43251	Homo sapiens	61.093	7	73	2	a-c
BPI fold-containing family B member 1	Q8TDL5	Homo sapiens	52.408	7	245	3	a-c
Calmodulin-like protein 3	P27482	Homo sapiens	16.88	11	47	1	g
Carbonic anhydrase 6	P23280	Homo sapiens	35.345	13	332	3	e
Catalase	Q2I6W4	Callithrix jacchus	59.763	35	285	14	a-c
Cathelicidin antimicrobial peptide	Q1KLX0	Saguinus oedipus	18.775	7	47	1	g
Cathepsin B	P07858	Homo sapiens	37.797	5	43	1	d
Cellular retinoic acid-binding protein 2	P29373	Homo sapiens	15.683	28	126	3	g
Clusterin	P10909	Homo sapiens	52.461	11	72	2	e
Collectin subfamily member 11	F7H2F8	Macaca mulatta	28.564	4	41	1	j
Complement C3	P01024	Homo sapiens	187.03	5	151	4	a-c
Complement C4-A	P0C0L4	Homo sapiens	192.664	2	117	2	a-c
Cornulin	Q9UBG3	Homo sapiens	53.502	5	64	1	a-c
CRP55	F7FMQ2	Macaca mulatta	48.084	17	72	3	a-c
Cystatin-A	P01040	Homo sapiens	11	12	61	1	g
Cystatin-B	Q8I030	Pan troglodytes	11.147	24	196	2	g
Cystatin-C	O19093	Saimiri sciureus	15.936	29	96	2	g
Cystatin-D	P28325	Homo sapiens	16.07	14	115	2	f
Cytokeratin-1	F7B786	Macaca mulatta	65.17	30	413	16	f
Cytokeratin-10 (Fragment)	G7PUP9	Macaca fascicularis	57.824	13	299	7	i
Cytokeratin-1B	G7PID4	Macaca fascicularis	62.173	4	108	2	i
Cytokeratin-2e	G7PID3	Macaca fascicularis	65.462	11	213	7	i
Cytokeratin-6C	G7PIC8	Macaca fascicularis	59.85	6	110	3	i
Deoxyribonuclease-1	P24855	Homo sapiens	31.414	4	70	1	e
Dermcidin	P81605	Homo sapiens	11.277	22	52	1	i
Desmoplakin-3	F7H7V0	Macaca mulatta	81.723	2	43	1	a-c
DnaJ homolog subfamily C member 3	F6VD19	Macaca mulatta	57.601	9	86	5	a-c
Elongation factor 1-alpha	G7NZC8	Macaca fascicularis	50.155	2	33	1	i
Elongation factor 2	A0SXL6	Callithrix jacchus	95.25	13	46	1	i
Endoplasmic reticulum lectin 1 isoform 1	F7BCV3	Macaca mulatta	54.886	5	28	1	a-c
Endoplasmin	F7EZT6	Macaca mulatta	92.555	3	31	2	a-c
ER-Golgi intermediate compartment 53 kDa protein	F6SS58	Macaca mulatta	57.322	13	66	3	a-c
ERO1-like protein alpha	Q96HE7	Homo sapiens	54.358	21	125	7	a-c
Ezrin	P15311	Homo sapiens	69.37	10	70	3	a-c
Fatty acid-binding protein, epidermal	Q01469	Homo sapiens	15.155	28	92	3	g
Fructose-bisphosphate aldolase A	A5A6I5	Pan troglodytes	39.409	4	61	1	d
Furin	G7MVY8	Macaca mulatta	86.652	34	925	20	a-c
Galectin-7	P47929	Homo sapiens	15.066	12	46	1	g
Gamma-enolase	G7PJP0	Macaca fascicularis	51.035	4	99	1	k-m
Gamma-glutamyl hydrolase	Q92820	Homo sapiens	35.941	4	63	1	e
Gelsolin	P06396	Homo sapiens	85.644	14	113	4	a-c
Glucose-6-phosphate isomerase	P06744	Homo sapiens	63.107	22	266	6	a-c
Glucosidase 2 subunit beta	P14314	Homo sapiens	59.388	18	76	6	a-c
Glutaminyl-peptide cyclotransferase	F7GTQ0	Macaca mulatta	40.908	4	61	1	f
Glutaredoxin-1	P35754	Homo sapiens	11.768	13	299	1	i
Glyceraldehyde-3-phosphate dehydrogenase	P04406	Homo sapiens	36.03	4	42	1	f
Guanylate-binding protein 6	Q6ZN66	Homo sapiens	72.381	14	91	5	a-c
Haptoglobin	P50417	Ateles geoffroyi	38.451	3	50	1	d
Heat shock 70 kDa protein 1	Q5R7D3	Pongo abelii	70.009	28	259	10	a-c
Heat shock cognate 71 kDa protein isoform 1	F6RLH5	Macaca mulatta	70.854	24	194	10	a-c
Heat shock-related 70 kDa protein 2	P54652	Homo sapiens	69.978	9	195	5	j
Hemoglobin beta chain	G7PQY3	Macaca fascicularis	16.104	16	137	2	i
Histidine-rich glycoprotein	P04196	Homo sapiens	59.541	7	149	3	a-c
Histone H1c	G7P2N4	Macaca fascicularis	22.314	5	40	1	i
Histone H2A (Fragment)	F6TDW8	Macaca mulatta	15.578	13	78	2	j
Histone H4	G7P2N0	Macaca fascicularis	11.36	10	74	1	i
Ig mu chain C region	P01871	Homo sapiens	49.276	6	46	2	a-c
Junction plakoglobin	P14923	Homo sapiens	81.693	2	43	1	a-c
Keratin 14	F7H312	Macaca mulatta	51.851	14	118	4	f
Keratin, type I cytoskeletal	P02533	Homo sapiens	51.529	24	62	6	a-c
Keratin, type I cytoskeletal 10	P13645	Homo sapiens	58.792	42	518	15	a-c
Keratin, type I cytoskeletal 13	P13646	Homo sapiens	49.557	24	121	7	a-c
Keratin, type I cytoskeletal 14	P02533	Homo sapiens	51.529	12	172	5	f
Keratin, type I cytoskeletal 9	P35527	Homo sapiens	62.027	36	553	17	a-c
Keratin, type II cytoskeletal 1	P04264	Homo sapiens	65.999	36	839	17	f
Keratin, type II cytoskeletal 2	P35908	Homo sapiens	65.393	22	304	8	f
Keratin, type II cytoskeletal 2 epidermal	P35908	Homo sapiens	65.393	11	173	5	i
Keratin, type II cytoskeletal 4	P19013	Homo sapiens	57.25	17	103	4	a-c
Keratin, type II cytoskeletal 5	P13647	Homo sapiens	62.34	4	66	2	d
Keratin, type II cytoskeletal 6A	P02538	Homo sapiens	60.008	7	146	4	f
Keratin, type II cytoskeletal 6B	P04259	Homo sapiens	60.03	10	58	2	i
Keratin, type II cytoskeletal 74	Q7RTS7	Homo sapiens	57.83	2	49	1	f
Keratin, type II cytoskeletal 78	Q8N1N4	Homo sapiens	56.83	7	64	3	a-c
L-lactate dehydrogenase B chain	A5A6N7	Homo sapiens	36.629	7	44	1	e
Lactoperoxidase	P22079	Homo sapiens	80.237	30	478	15	a-c
Lactotransferrin	P02788	Homo sapiens	78.132	11	335	8	a-c
LanC-like protein 1	O43813	Homo sapiens	45.254	3	65	1	d
Legumain	Q4R4T8	Macaca fascicularis	49.406	4	28	1	a-c
Leukocyte elastase inhibitor	P30740	Homo sapiens	42.715	6	58	2	d
Leukotriene A(4) hydrolase	F7H193	Macaca mulatta	69.302	6	85	2	a-c
Malate dehydrogenase, mitochondrial	P40926	Homo sapiens	35.481	26	93	2	e
Matrix metalloproteinase-9	F6W5A7	Macaca mulatta	78.431	2	35	1	a-c
Neural proliferation differentiation and control protein 1	Q9NQX5	Homo sapiens	34.494	4	58	1	f
Neural proliferation, differentiation and control 1	F7DPX1	Macaca mulatta	34.566	4	58	1	f
Neutral alpha-glucosidase AB	Q14697	Homo sapiens	106.807	2	63	1	g
Nucleobindin-1	Q02818	Homo sapiens	53.846	23	67	8	a-c
Nucleobindin-2	P80303	Homo sapiens	50.164	40	462	16	a-c
Nucleoside diphosphate kinase	G7PUB9	Macaca fascicularis	19.389	5	56	1	f
Nucleotide exchange factor SIL1	Q9H173	Homo sapiens	52.052	6	65	2	d
Ovostatin homolog 2	Q6IE36	Homo sapiens	161.149	4	32	2	a-c
Peptidyl-prolyl cis-trans isomerase A	Q6DTV9	Aotus trivirgatus	17.886	55	148	4	f
Peptidyl-prolyl cis-trans isomerase B	P23284	Homo sapiens	23.728	12	125	2	f
Plastin-2	P13796	Homo sapiens	70.244	22	117	8	a-c
Plastin-3 isoform 1	F7GYM9	Macaca mulatta	70.766	8	126	3	a-c
Polyubiquitin-C	G7PWZ9	Macaca fascicularis	13.068	13	33	1	i
POTE ankyrin domain family member E	Q6S8J3	Homo sapiens	121.286	2	24	1	k-m
Profilin-1	P07737	Homo sapiens	15.045	51	178	5	g
Prosaposin	P07602	Homo sapiens	58.074	13	135	5	a-c
Protein disulfide-isomerase	P07237	Homo sapiens	57.081	18	54	5	a-c
Protein ERGIC-53	P49257	Homo sapiens	57.513	13	60	3	a-c
Protein S100	G7NUG4	Macaca fascicularis	10.173	13	46	1	i
Protein S100-A6	P06703	Homo sapiens	10.173	10	45	1	i
Protein S100-A8	P05109	Homo sapiens	10.828	24	97	2	i
Putative aldo-keto reductase family 1 member C8	Q5T2L2	Homo sapiens	14.578	6	55	1	e
Putative ubiquitin-conjugating enzyme E2 N-like	Q5JXB2	Homo sapiens	17.366	7	55	1	f
Putative uncharacterized protein	G7PRG1	Macaca fascicularis	22.62	7	37	1	f
Putative uncharacterized protein	G7PQY2	Macaca fascicularis	16.117	7	38	1	h
Putative uncharacterized protein	G7PUS5	Macaca fascicularis	51.688	9	166	4	i
Putative uncharacterized protein	G7PHX5	Macaca fascicularis	11.259	10	58	1	i
Putative uncharacterized protein	G8F2G9	Macaca fascicularis	27.784	7	53	2	i
Putative uncharacterized protein	G7P5L7	Macaca fascicularis	68.828	2	52	1	i
Putative uncharacterized protein	G7NY31	Macaca fascicularis	77.774	1	52	1	i
Putative uncharacterized protein	G7PT41	Macaca fascicularis	42.173	3	44	1	i
Putative uncharacterized protein	G7PGL4	Macaca fascicularis	52.596	2	38	1	i
Putative uncharacterized protein 1	G7PUF6	Macaca fascicularis	80.694	1	38	1	i
Pyruvate kinase	F7F0E8	Macaca mulatta	58.044	17	89	5	a-c
Retinol-binding protein 2	P06768	Rattus norvegicus	15.575	7	44	1	g
Ribonuclease T2	O00584	Homo sapiens	29.462	6	47	1	e
Serine/threonine-protein phosphatase 2A 65 kDa regulatory subunit A alpha isoform	F6RRV0	Macaca mulatta	65.267	12	66	4	a-c
Serotransferrin	A5A6I6	Pan troglodytes	77.014	19	299	8	a-c
Serpin B5	B1MTB7	Callicebus moloch	41.981	3	58	1	d
Serum albumin	F7HCH2	Macaca mulatta	68.829	20	570	14	a-c
Sulfhydryl oxidase 1	H2N4I1	Pongo abelii	82.752	6	112	3	a-c
Syncytin-1	P61561	Gorilla gorilla gorilla	59.9	2	45	1	g
Thioltransferase-1	G7P7Z2	Macaca fascicularis	11.839	10	45	1	i
Thioredoxin	Q5R9M3	Pongo abelii	11.877	11	46	1	g
Thrombospondin-1	P07996	Homo sapiens	129.3	1	57	1	e
Transcription elongation factor SPT6	G7PTX9	Macaca fascicularis	198.967	1	36	1	i
Transketolase	Q5R1W6	Pan troglodytes	67.797	27	284	9	a-c
Tropomyosin alpha-3 chain	P06753	Homo sapiens	32.93	17	73	2	e
Tropomyosin beta chain	P07951	Homo sapiens	32.831	8	71	1	e
Tubulin beta chain	F6QAX2	Macaca mulatta	50.4	2	40	1	k-m
Tumor necrosis factor receptor superfamily member 6	P25445	Homo sapiens	37.708	5	25	1	h
Uncharacterized protein	F7E526	Macaca mulatta	59.936	12	107	5	f
Uncharacterized protein	F6RSN8	Macaca mulatta	54.523	3	51	1	k-m
WD repeat-containing protein 1	O75083	Homo sapiens	66.152	14	78	4	a-c
Zymogen granule protein 16 homolog B	Q96DA0	Homo sapiens	22.725	4	51	1	f

## Sheet: Raw data
Description	Accession	Matching species	MW [kDa]	Coverage	Score Mascot	# Peptides Mascot	Pool reference
Sequence	Confidence		Master Protein Accessions	Modifications	Percolator PEP Sequest HT
MLSSFLSEDVFK	High		P15144		0.008597
Confidence	Checked		Master Protein Accessions	Identifying Node	DeltaM [ppm]	Deltam/z [Da]	Ion Inject Time [ms]	RT [min]	First Scan	Spectrum File	Ions Matched	Ions Score	Identity Strict	Identity Relaxed	Expectation Value	XCorr	Percolator q-Value	Percolator PEP
High	TRUE		P15144	Mascot (A2)	0.368799	0.000258656	244	43.3787	7302	A_IyII_1-3.raw	10/88	59.83	45	38	0.000330435		0	0.0008946
High	TRUE		P15144	Sequest HT (A4)	0.368799	0.000258656	244	43.3787	7302	A_IyII_1-3.raw	0/0					4.56282	0	0.008597
FSTEYELQQLEQFKK	High		P15144		0.01239
Confidence	Checked		Master Protein Accessions	Identifying Node	DeltaM [ppm]	Deltam/z [Da]	Ion Inject Time [ms]	RT [min]	First Scan	Spectrum File	Ions Matched	Ions Score	Identity Strict	Identity Relaxed	Expectation Value	XCorr	Percolator q-Value	Percolator PEP
High	TRUE		P15144	Sequest HT (A4)	1.14212	0.000730178	244	36.1895	5818	A_IyII_1-3.raw	0/0					5.43122	0	0.01239
High	TRUE		P15144	Mascot (A2)	1.14212	0.000730178	244	36.1895	5818	A_IyII_1-3.raw	9/140	39.3	46	39	0.0555315		0	0.01695
RFSTEYELQQLEQFKK	High		P15144		0.000385
Confidence	Checked		Master Protein Accessions	Identifying Node	DeltaM [ppm]	Deltam/z [Da]	Ion Inject Time [ms]	RT [min]	First Scan	Spectrum File	Ions Matched	Ions Score	Identity Strict	Identity Relaxed	Expectation Value	XCorr	Percolator q-Value	Percolator PEP
High	TRUE		P15144	Mascot (A2)	0.950159	0.000656896	244	32.4513	5039	A_IyII_1-3.raw	18/180	38.97	46	39	0.0628312		0	0.000909
High	TRUE		P15144	Sequest HT (A4)	0.950159	0.000656896	244	32.4513	5039	A_IyII_1-3.raw	0/0					5.9276	0	0.000385
SDQIGLPDFNAGAMENWGLVTYR	High		P15541; P15144		0.001037
Confidence	Checked		Master Protein Accessions	Identifying Node	DeltaM [ppm]	Deltam/z [Da]	Ion Inject Time [ms]	RT [min]	First Scan	Spectrum File	Ions Matched	Ions Score	Identity Strict	Identity Relaxed	Expectation Value	XCorr	Percolator q-Value	Percolator PEP
High	TRUE		P15541; P15144	Mascot (A2)	0.310701	0.000264531	244	67.8513	12227	A_IyII_1-3.raw	18/256	23.19	45	38	1.89543		0	0.003923
High	TRUE		P15541; P15144	Sequest HT (A4)	0.310701	0.000264531	244	67.8513	12227	A_IyII_1-3.raw	0/0					3.6396	0	0.001037
High	TRUE		P15541; P15144	Mascot (A2)	1.46297	0.00186836	244	67.9002	12237	A_IyII_1-3.raw	8/256	42.75	46	39	0.0219096		0	0.01228
High	TRUE		P15541; P15144	Sequest HT (A4)	1.46297	0.00186836	244	67.9002	12237	A_IyII_1-3.raw	0/0					3.05465	0.002128	0.1544
78 kDa glucose-regulated protein OS=Homo sapiens GN=HSPA5 PE=1 SV=2	P11021	Homo sapiens	72.288	50.9174	587.492	29	a-c
Sequence	Confidence	Homo sapiens	Master Protein Accessions	Modifications	Percolator PEP Sequest HT		a-c
RFSTEYELQQLEQFRLNNLDTGFGSGTR	High	Homo sapiens	P15541	2xDeamidated [N17; N18]	0.05033		a-c
Confidence	Checked	Homo sapiens	Master Protein Accessions	Identifying Node	DeltaM [ppm]	Deltam/z [Da]	a-c	RT [min]	First Scan	Spectrum File	Ions Matched	Ions Score	Identity Strict	Identity Relaxed	Expectation Value	XCorr	Percolator q-Value	Percolator PEP
High	TRUE	Homo sapiens	P15541	Sequest HT (A4)	1.13884	0.000941989	a-c	35.6132	5699	A_IyII_1-3.raw	0/0					4.73042	0	0.05033
High	TRUE	Homo sapiens	P15541	Mascot (A2)	1.13884	0.000941989	a-c	35.6132	5699	A_IyII_1-3.raw	15/324	27.25	46	39	0.844346		0	0.007904
FSTEYELQQLEQFRLNNLDTGFGSGTR	High	Homo sapiens	P15541	2xDeamidated [N16; N17]	0.02326		a-c
Confidence	Checked	Homo sapiens	Master Protein Accessions	Identifying Node	DeltaM [ppm]	Deltam/z [Da]	a-c	RT [min]	First Scan	Spectrum File	Ions Matched	Ions Score	Identity Strict	Identity Relaxed	Expectation Value	XCorr	Percolator q-Value	Percolator PEP
High	TRUE	Homo sapiens	P15541	Sequest HT (A4)	0.92074	0.000967538	a-c	38.4362	6285	A_IyII_1-3.raw	0/0					5.01688	0	0.001827
High	TRUE	Homo sapiens	P15541	Mascot (A2)	0.92074	0.000967538	a-c	38.4362	6285	A_IyII_1-3.raw	20/284	29.72	45	38	0.412346		0	0.004331
High	TRUE	Homo sapiens	P15541	Sequest HT (A4)	1.052	0.000829104	a-c	38.3912	6276	A_IyII_1-3.raw	0/0					5.5713	0	0.02326
High	TRUE	Homo sapiens	P15541	Mascot (A2)	1.052	0.000829104	a-c	38.3912	6276	A_IyII_1-3.raw	12/284	24.66	45	38	1.32107		0.001533	0.03076
SDQIGLPDFNAGAMENWGLVTYR	High	Homo sapiens	P15541; P15144		0.001037		a-c
Confidence	Checked	Homo sapiens	Master Protein Accessions	Identifying Node	DeltaM [ppm]	Deltam/z [Da]	a-c	RT [min]	First Scan	Spectrum File	Ions Matched	Ions Score	Identity Strict	Identity Relaxed	Expectation Value	XCorr	Percolator q-Value	Percolator PEP
High	TRUE	Homo sapiens	P15541; P15144	Mascot (A2)	0.310701	0.000264531	a-c	67.8513	12227	A_IyII_1-3.raw	18/256	23.19	45	38	1.89543		0	0.003923
High	TRUE	Homo sapiens	P15541; P15144	Sequest HT (A4)	0.310701	0.000264531	a-c	67.8513	12227	A_IyII_1-3.raw	0/0					3.6396	0	0.001037
High	TRUE	Homo sapiens	P15541; P15144	Mascot (A2)	1.46297	0.00186836	a-c	67.9002	12237	A_IyII_1-3.raw	8/256	42.75	46	39	0.0219096		0	0.01228
High	TRUE	Homo sapiens	P15541; P15144	Sequest HT (A4)	1.46297	0.00186836	a-c	67.9002	12237	A_IyII_1-3.raw	0/0					3.05465	0.002128	0.1544
Sequence	Confidence	Homo sapiens	Master Protein Accessions	Modifications	Percolator PEP Sequest HT		a-c
VLNSIFFELEADEKEPTESTQQPK	High	Homo sapiens	Q9TSZ0		2.038e-05		a-c
Confidence	Checked	Homo sapiens	Master Protein Accessions	Identifying Node	DeltaM [ppm]	Deltam/z [Da]	a-c	RT [min]	First Scan	Spectrum File	Ions Matched	Ions Score	Identity Strict	Identity Relaxed	Expectation Value	XCorr	Percolator q-Value	Percolator PEP
High	TRUE	Homo sapiens	Q9TSZ0	Sequest HT (A4)	1.50657	0.00139577	a-c	39.6966	6546	A_IyII_1-3.raw	0/0					5.70946	0	2.038e-05
High	TRUE	Homo sapiens	Q9TSZ0	Mascot (A2)	1.50657	0.00139577	a-c	39.6966	6546	A_IyII_1-3.raw	15/268	69.91	47	40	5.44467e-05		0	1.788e-05
Sequence	Confidence	Homo sapiens	Master Protein Accessions	Modifications	Percolator PEP Sequest HT		a-c
GVDEATIIDILTKR	High	Homo sapiens	P04083		0.01178		a-c
Confidence	Checked	Homo sapiens	Master Protein Accessions	Identifying Node	DeltaM [ppm]	Deltam/z [Da]	a-c	RT [min]	First Scan	Spectrum File	Ions Matched	Ions Score	Identity Strict	Identity Relaxed	Expectation Value	XCorr	Percolator q-Value	Percolator PEP
High	TRUE	Homo sapiens	P04083	Sequest HT (A4)	0.549389	0.000282728	a-c	43.6753	7362	A_IyII_1-3.raw	0/0					3.55161	0	0.01178
High	TRUE	Homo sapiens	P04083	Mascot (A2)	0.549389	0.000282728	a-c	43.6753	7362	A_IyII_1-3.raw	6/108	26.87	44	37	0.595797		0	0.01395
GLGTDEDTLIEILASR	High	Homo sapiens	P04083		0.003157		a-c
Confidence	Checked	Homo sapiens	Master Protein Accessions	Identifying Node	DeltaM [ppm]	Deltam/z [Da]	a-c	RT [min]	First Scan	Spectrum File	Ions Matched	Ions Score	Identity Strict	Identity Relaxed	Expectation Value	XCorr	Percolator q-Value	Percolator PEP
High	TRUE	Homo sapiens	P04083	Sequest HT (A4)	1.80365	0.00153571	a-c	62.5479	11157	A_IyII_1-3.raw	0/0					4.39873	0	0.003157
High	TRUE	Homo sapiens	P04083	Mascot (A2)	1.80365	0.00153571	a-c	62.5479	11157	A_IyII_1-3.raw	8/120	59.74	46	39	0.000507384		0	0.003268
High	TRUE	Homo sapiens	P04083	Sequest HT (A4)	1.30186	0.00110846	a-c	62.5178	11151	A_IyII_1-3.raw	0/0					3.759	0	0.01353
High	TRUE	Homo sapiens	P04083	Mascot (A2)	1.30186	0.00110846	a-c	62.5178	11151	A_IyII_1-3.raw	6/120	29.7	46	39	0.500453		0.001533	0.03354
High	TRUE	Homo sapiens	P04083	Mascot (A2)	1.72407	0.000978632	a-c	62.6116	11170	A_IyII_1-3.raw	7/120	14.5	46	39	17.2368		0.002414	0.04286
Keratin, type I cytoskeletal 9 OS=Homo sapiens GN=KRT9 PE=1 SV=3	P35527	Homo sapiens	62.027	35.7945	553.23	17	a-c
Sequence	Confidence	Homo sapiens	Master Protein Accessions	Modifications	Percolator PEP Sequest HT		a-c
NDNDNIFLSPLSISTAFAMTK	High	Homo sapiens	P01008	1xOxidation [M19]	0.02038		a-c
Confidence	Checked	Homo sapiens	Master Protein Accessions	Identifying Node	DeltaM [ppm]	Deltam/z [Da]	a-c	RT [min]	First Scan	Spectrum File	Ions Matched	Ions Score	Identity Strict	Identity Relaxed	Expectation Value	XCorr	Percolator q-Value	Percolator PEP
High	TRUE	Homo sapiens	P01008	Sequest HT (A4)	0.937664	0.0010854	a-c	68.9104	12442	A_IyII_1-3.raw	0/0					4.03743	0	0.02038
High	TRUE	Homo sapiens	P01008	Mascot (A2)	0.937664	0.0010854	a-c	68.9104	12442	A_IyII_1-3.raw	7/240	35.58	46	39	0.123696		0	0.008515
FATTFYQHLADSK	High	Homo sapiens	P01008		0.01622		a-c
Confidence	Checked	Homo sapiens	Master Protein Accessions	Identifying Node	DeltaM [ppm]	Deltam/z [Da]	a-c	RT [min]	First Scan	Spectrum File	Ions Matched	Ions Score	Identity Strict	Identity Relaxed	Expectation Value	XCorr	Percolator q-Value	Percolator PEP
High	TRUE	Homo sapiens	P01008	Sequest HT (A4)	0.822961	0.000419365	a-c	29.6296	4451	A_IyII_1-3.raw	0/0					3.05646	0	0.01622
High	TRUE	Homo sapiens	P01008	Mascot (A2)	0.822961	0.000419365	a-c	29.6296	4451	A_IyII_1-3.raw	9/120	16.15	44	37	6.5749		0.002414	0.06252
NDNDNIFLSPLSISTAFAMTK	High	Homo sapiens	P01008		0.08278		a-c
Confidence	Checked	Homo sapiens	Master Protein Accessions	Identifying Node	DeltaM [ppm]	Deltam/z [Da]	a-c	RT [min]	First Scan	Spectrum File	Ions Matched	Ions Score	Identity Strict	Identity Relaxed	Expectation Value	XCorr	Percolator q-Value	Percolator PEP
High	TRUE	Homo sapiens	P01008	Sequest HT (A4)	1.06862	0.00122845	a-c	73.7139	13409	A_IyII_1-3.raw	0/0					4.02895	0	0.08278
High	TRUE	Homo sapiens	P01008	Mascot (A2)	1.06862	0.00122845	a-c	73.7139	13409	A_IyII_1-3.raw	8/240	28.28	46	39	0.684942		0.004235	0.1092
Nucleobindin-2 OS=Homo sapiens GN=NUCB2 PE=1 SV=2	P80303	Homo sapiens	50.164	39.5238	461.704	16	a-c
Sequence	Confidence	Homo sapiens	Master Protein Accessions	Modifications	Percolator PEP Sequest HT		a-c
DVNEQDVLLFIDNIFR	High	Homo sapiens	A4QLB3		0.02809		a-c
Confidence	Checked	Homo sapiens	Master Protein Accessions	Identifying Node	DeltaM [ppm]	Deltam/z [Da]	a-c	RT [min]	First Scan	Spectrum File	Ions Matched	Ions Score	Identity Strict	Identity Relaxed	Expectation Value	XCorr	Percolator q-Value	Percolator PEP
High	TRUE	Homo sapiens	A4QLB3	Sequest HT (A4)	0.580931	0.000566407	a-c	86.392	15847	A_IyII_1-3.raw	0/0					2.53276	0	0.02809
High	TRUE	Homo sapiens	A4QLB3	Mascot (A2)	0.580931	0.000566407	a-c	86.392	15847	A_IyII_1-3.raw	6/172	12.43	46	39	26.7423		0.001533	0.03636
Keratin, type I cytoskeletal 10 OS=Homo sapiens GN=KRT10 PE=1 SV=6	P13645	Homo sapiens	58.792	42.1233	517.785	15	a-c
Sequence	Confidence	Homo sapiens	Master Protein Accessions	Modifications	Percolator PEP Sequest HT		a-c
TVLIMEIINNVAK	High	Homo sapiens	P38482		0.003818		a-c
Confidence	Checked	Homo sapiens	Master Protein Accessions	Identifying Node	DeltaM [ppm]	Deltam/z [Da]	a-c	RT [min]	First Scan	Spectrum File	Ions Matched	Ions Score	Identity Strict	Identity Relaxed	Expectation Value	XCorr	Percolator q-Value	Percolator PEP
High	TRUE	Homo sapiens	P38482	Mascot (A2)	0.777603	0.00056681	a-c	64.227	11496	A_IyII_1-3.raw	17/112	74.21	42	35	7.54268e-06		0	0.0002995
High	TRUE	Homo sapiens	P38482	Sequest HT (A4)	0.777603	0.00056681	a-c	64.227	11496	A_IyII_1-3.raw	0/0					4.24374	0	0.003818
Keratin, type II cytoskeletal 1 OS=Homo sapiens GN=KRT1 PE=1 SV=6	P04264	Homo sapiens	65.999	29.0373	332.353	15	a-c
Sequence	Confidence	Homo sapiens	Master Protein Accessions	Modifications	Percolator PEP Sequest HT		a-c
SYELPDGQVITIGNER	High	Homo sapiens	Q8BFZ3; P45521; P08023		0.001524		a-c
Confidence	Checked	Homo sapiens	Master Protein Accessions	Identifying Node	DeltaM [ppm]	Deltam/z [Da]	a-c	RT [min]	First Scan	Spectrum File	Ions Matched	Ions Score	Identity Strict	Identity Relaxed	Expectation Value	XCorr	Percolator q-Value	Percolator PEP
High	TRUE	Homo sapiens	Q8BFZ3; P45521; P08023	Mascot (A2)	0.83065	0.000495868	a-c	38.5148	6301	A_IyII_1-3.raw	9/152	42.16	47	40	0.0311791		0	0.006988
High	TRUE	Homo sapiens	Q8BFZ3; P45521; P08023	Sequest HT (A4)	0.83065	0.000495868	a-c	38.5148	6301	A_IyII_1-3.raw	0/0					3.62088	0	0.01091
High	TRUE	Homo sapiens	Q8BFZ3; P45521; P08023	Sequest HT (A4)	1.07672	0.000964148	a-c	38.5554	6309	A_IyII_1-3.raw	0/0					5.04487	0	0.001524
High	TRUE	Homo sapiens	Q8BFZ3; P45521; P08023	Mascot (A2)	1.07672	0.000964148	a-c	38.5554	6309	A_IyII_1-3.raw	11/152	87.19	47	40	9.79277e-07		0	0.0001144
TTGIVMDSGDGVTHTVPIYEGYALPHAILR	High	Homo sapiens	Q8BFZ3	1xOxidation [M6]	0.008636		a-c
Confidence	Checked	Homo sapiens	Master Protein Accessions	Identifying Node	DeltaM [ppm]	Deltam/z [Da]	a-c	RT [min]	First Scan	Spectrum File	Ions Matched	Ions Score	Identity Strict	Identity Relaxed	Expectation Value	XCorr	Percolator q-Value	Percolator PEP
High	TRUE	Homo sapiens	Q8BFZ3	Sequest HT (A4)	0.854715	0.000683688	a-c	38.4604	6290	A_IyII_1-3.raw	0/0					4.73057	0	0.008636
High	TRUE	Homo sapiens	Q8BFZ3	Mascot (A2)	0.854715	0.000683688	a-c	38.4604	6290	A_IyII_1-3.raw	24/232	35.84	46	39	0.127428		0	0.007821
IDIAGRDLTDYLMK	High	Homo sapiens	Q8BFZ3; P08023		0.03542		a-c
Confidence	Checked	Homo sapiens	Master Protein Accessions	Identifying Node	DeltaM [ppm]	Deltam/z [Da]	a-c	RT [min]	First Scan	Spectrum File	Ions Matched	Ions Score	Identity Strict	Identity Relaxed	Expectation Value	XCorr	Percolator q-Value	Percolator PEP
High	TRUE	Homo sapiens	Q8BFZ3; P08023	Sequest HT (A4)	0.958101	0.000518601	a-c	40.2853	6668	A_IyII_1-3.raw	0/0					3.7619	0	0.03542
High	TRUE	Homo sapiens	Q8BFZ3; P08023	Mascot (A2)	0.958101	0.000518601	a-c	40.2853	6668	A_IyII_1-3.raw	10/136	25.29	46	39	1.32489		0.002414	0.0712
VAPDEHPILLTEAPLNPK	High	Homo sapiens	Q8BFZ3		0.1299		a-c
Confidence	Checked	Homo sapiens	Master Protein Accessions	Identifying Node	DeltaM [ppm]	Deltam/z [Da]	a-c	RT [min]	First Scan	Spectrum File	Ions Matched	Ions Score	Identity Strict	Identity Relaxed	Expectation Value	XCorr	Percolator q-Value	Percolator PEP
High	TRUE	Homo sapiens	Q8BFZ3	Sequest HT (A4)	0.636512	0.000414595	a-c	31.0317	4742	A_IyII_1-3.raw	0/0					3.05512	0.001107	0.1299
Lactoperoxidase OS=Homo sapiens GN=LPO PE=1 SV=2	P22079	Homo sapiens	80.237	30.4775	478.223	15	a-c
Sequence	Confidence	Homo sapiens	Master Protein Accessions	Modifications	Percolator PEP Sequest HT		a-c
GSYNPVTHIYTAQDVK	High	Homo sapiens	P06865		0.07872		a-c
Confidence	Checked	Homo sapiens	Master Protein Accessions	Identifying Node	DeltaM [ppm]	Deltam/z [Da]	a-c	RT [min]	First Scan	Spectrum File	Ions Matched	Ions Score	Identity Strict	Identity Relaxed	Expectation Value	XCorr	Percolator q-Value	Percolator PEP
High	TRUE	Homo sapiens	P06865	Sequest HT (A4)	1.26453	0.000755719	a-c	26.7296	3856	A_IyII_1-3.raw	0/0					2.35471	0	0.07872
Catalase OS=Callithrix jacchus GN=CAT PE=2 SV=3	Q2I6W4	Callithrix jacchus	59.763	34.7249	285.254	14	a-c
Sequence	Confidence		Master Protein Accessions	Modifications	Percolator PEP Sequest HT		a-c
ALFEEVPELLTEAEKK	High		P31939		0.003776		a-c
Confidence	Checked		Master Protein Accessions	Identifying Node	DeltaM [ppm]	Deltam/z [Da]	a-c	RT [min]	First Scan	Spectrum File	Ions Matched	Ions Score	Identity Strict	Identity Relaxed	Expectation Value	XCorr	Percolator q-Value	Percolator PEP
High	TRUE		P31939	Sequest HT (A4)	1.24972	0.000768989	a-c	42.917	7207	A_IyII_1-3.raw	0/0					3.45128	0	0.003776
High	TRUE		P31939	Mascot (A2)	1.24972	0.000768989	a-c	42.917	7207	A_IyII_1-3.raw	12/124	32.88	45	39	0.205087		0	0.001674
EVSDGIIAPGYEEEALTILSK	High		P31939		0.1154		a-c
Confidence	Checked		Master Protein Accessions	Identifying Node	DeltaM [ppm]	Deltam/z [Da]	a-c	RT [min]	First Scan	Spectrum File	Ions Matched	Ions Score	Identity Strict	Identity Relaxed	Expectation Value	XCorr	Percolator q-Value	Percolator PEP
High	TRUE		P31939	Mascot (A2)	1.86281	0.00208089	a-c	62.3394	11115	A_IyII_1-3.raw	6/160	28.64	47	40	0.707184		0	0.02112
High	TRUE		P31939	Sequest HT (A4)	1.86281	0.00208089	a-c	62.3394	11115	A_IyII_1-3.raw	0/0					2.46522	0.001107	0.1154
DVSELTGFPEMLGGR	High		P31939		0.01008		a-c
Confidence	Checked		Master Protein Accessions	Identifying Node	DeltaM [ppm]	Deltam/z [Da]	a-c	RT [min]	First Scan	Spectrum File	Ions Matched	Ions Score	Identity Strict	Identity Relaxed	Expectation Value	XCorr	Percolator q-Value	Percolator PEP
High	TRUE		P31939	Sequest HT (A4)	0.367179	0.00029517	a-c	48.0682	8252	A_IyII_1-3.raw	0/0					3.32108	0	0.01008
High	TRUE		P31939	Mascot (A2)	0.367179	0.00029517	a-c	48.0682	8252	A_IyII_1-3.raw	8/112	42.24	45	38	0.0214515		0	0.019
Alpha-enolase OS=Homo sapiens GN=ENO1 PE=1 SV=2	P06733	Homo sapiens	47.139	42.6267	349.571	12	a-c
Sequence	Confidence		Master Protein Accessions	Modifications	Percolator PEP Sequest HT		a-c
TSIYPFLDFMPSPQVVR	High		P43251		0.001203		a-c
Confidence	Checked		Master Protein Accessions	Identifying Node	DeltaM [ppm]	Deltam/z [Da]	a-c	RT [min]	First Scan	Spectrum File	Ions Matched	Ions Score	Identity Strict	Identity Relaxed	Expectation Value	XCorr	Percolator q-Value	Percolator PEP
High	TRUE		P43251	Mascot (A2)	1.45279	0.00145062	a-c	67.8952	12236	A_IyII_1-3.raw	11/140	47.84	46	39	0.00715631		0	0.00208
High	TRUE		P43251	Sequest HT (A4)	1.45279	0.00145062	a-c	67.8952	12236	A_IyII_1-3.raw	0/0					4.49622	0	0.001203
TSIYPFLDFMPSPQVVR	High		P43251	1xOxidation [M10]	0.01703		a-c
Confidence	Checked		Master Protein Accessions	Identifying Node	DeltaM [ppm]	Deltam/z [Da]	a-c	RT [min]	First Scan	Spectrum File	Ions Matched	Ions Score	Identity Strict	Identity Relaxed	Expectation Value	XCorr	Percolator q-Value	Percolator PEP
High	TRUE		P43251	Sequest HT (A4)	1.60233	0.00161275	a-c	51.5128	8948	A_IyII_1-3.raw	0/0					4.30317	0	0.01703
High	TRUE		P43251	Mascot (A2)	1.60233	0.00161275	a-c	51.5128	8948	A_IyII_1-3.raw	8/140	50.77	46	39	0.00359677		0	0.009822
HVVYPTAWMNQLPLLAAIEIQK	High		P43251		0.03568		a-c
Confidence	Checked		Master Protein Accessions	Identifying Node	DeltaM [ppm]	Deltam/z [Da]	a-c	RT [min]	First Scan	Spectrum File	Ions Matched	Ions Score	Identity Strict	Identity Relaxed	Expectation Value	XCorr	Percolator q-Value	Percolator PEP
High	TRUE		P43251	Sequest HT (A4)	1.43359	0.00121157	a-c	70.006	12662	A_IyII_1-3.raw	0/0					4.71757	0	0.03568
High	TRUE		P43251	Mascot (A2)	1.43359	0.00121157	a-c	70.006	12662	A_IyII_1-3.raw	11/216	24.74	42	35	0.648981		0.002414	0.08843
HVVYPTAWMNQLPLLAAIEIQK	High		P43251	1xOxidation [M9]	0.1724		a-c
Confidence	Checked		Master Protein Accessions	Identifying Node	DeltaM [ppm]	Deltam/z [Da]	a-c	RT [min]	First Scan	Spectrum File	Ions Matched	Ions Score	Identity Strict	Identity Relaxed	Expectation Value	XCorr	Percolator q-Value	Percolator PEP
High	TRUE		P43251	Sequest HT (A4)	0.523031	0.000444816	a-c	61.6406	10974	A_IyII_1-3.raw	0/0					3.42043	0.002128	0.1724
Catalase OS=Pongo abelii GN=CAT PE=2 SV=3	Q5RF10	Pongo abelii	59.683	32.6376	160.281	12	a-c
Sequence	Confidence		Master Protein Accessions	Modifications	Percolator PEP Sequest HT		a-c
ALGFEAAESSLTK	High		Q8TDL5		0.04385		a-c
Confidence	Checked		Master Protein Accessions	Identifying Node	DeltaM [ppm]	Deltam/z [Da]	a-c	RT [min]	First Scan	Spectrum File	Ions Matched	Ions Score	Identity Strict	Identity Relaxed	Expectation Value	XCorr	Percolator q-Value	Percolator PEP
High	TRUE		Q8TDL5	Sequest HT (A4)	0.962008	0.000636695	a-c	32.7005	5092	A_IyII_1-3.raw	0/0					4.42193	0	0.04385
High	TRUE		Q8TDL5	Mascot (A2)	0.962008	0.000636695	a-c	32.7005	5092	A_IyII_1-3.raw	9/96	87.42	45	38	6.01727e-07		0	0.001733
ALGFEAAESSLTKDALVLTPASLWKPSSPVSQ	High		Q8TDL5		0.006377		a-c
Confidence	Checked		Master Protein Accessions	Identifying Node	DeltaM [ppm]	Deltam/z [Da]	a-c	RT [min]	First Scan	Spectrum File	Ions Matched	Ions Score	Identity Strict	Identity Relaxed	Expectation Value	XCorr	Percolator q-Value	Percolator PEP
High	TRUE		Q8TDL5	Mascot (A2)	1.28852	0.00141768	a-c	66.9689	12047	A_IyII_1-3.raw	15/324	47.79	44	37	0.00500687		0	0.009872
High	TRUE		Q8TDL5	Sequest HT (A4)	1.28852	0.00141768	a-c	66.9689	12047	A_IyII_1-3.raw	0/0					5.27133	0	0.005294
High	TRUE		Q8TDL5	Sequest HT (A4)	-0.153811	-0.00016923	a-c	68.5364	12366	A_IyII_1-3.raw	0/0					5.69353	0	0.006377
High	TRUE		Q8TDL5	Mascot (A2)	-0.153811	-0.00016923	a-c	68.5364	12366	A_IyII_1-3.raw	15/324	62.84	45	38	0.000165307		0	0.001591
High	TRUE		Q8TDL5	Sequest HT (A4)	1.84326	0.00202804	a-c	63.7051	11391	A_IyII_1-3.raw	0/0					3.74114	0.002128	0.1683
High	TRUE		Q8TDL5	Mascot (A2)	0.511879	0.000563192	a-c	70.1134	12684	A_IyII_1-3.raw	11/324	35.89	44	37	0.0789385		0.002414	0.071
DALVLTPASLWKPSSPVSQ	High		Q8TDL5		0.0003088		a-c
Confidence	Checked		Master Protein Accessions	Identifying Node	DeltaM [ppm]	Deltam/z [Da]	a-c	RT [min]	First Scan	Spectrum File	Ions Matched	Ions Score	Identity Strict	Identity Relaxed	Expectation Value	XCorr	Percolator q-Value	Percolator PEP
High	TRUE		Q8TDL5	Sequest HT (A4)	1.23861	0.00123618	a-c	55.5881	9771	A_IyII_1-3.raw	0/0					3.86749	0	0.06288
High	TRUE		Q8TDL5	Mascot (A2)	0.932833	0.000931003	a-c	60.3534	10715	A_IyII_1-3.raw	11/172	42.05	44	37	0.019367		0	0.005307
High	TRUE		Q8TDL5	Sequest HT (A4)	0.932833	0.000931003	a-c	60.3534	10715	A_IyII_1-3.raw	0/0					4.53923	0	0.003526
High	TRUE		Q8TDL5	Sequest HT (A4)	1.01783	0.000677221	a-c	49.1849	8477	A_IyII_1-3.raw	0/0					4.7956	0	0.00947
High	TRUE		Q8TDL5	Mascot (A2)	1.01783	0.000677221	a-c	49.1849	8477	A_IyII_1-3.raw	17/172	30.2	44	37	0.292323		0	0.01555
High	TRUE		Q8TDL5	Sequest HT (A4)	1.17745	0.00117514	a-c	49.0803	8456	A_IyII_1-3.raw	0/0					5.66382	0	0.0003088
High	TRUE		Q8TDL5	Mascot (A2)	1.17745	0.00117514	a-c	49.0803	8456	A_IyII_1-3.raw	14/172	63.96	44	37	0.000118106		0	0.0002432
High	TRUE		Q8TDL5	Sequest HT (A4)	1.05514	0.00105307	a-c	50.6317	8770	A_IyII_1-3.raw	0/0					4.37514	0	0.0921
High	TRUE		Q8TDL5	Sequest HT (A4)	-0.0456494	-4.55598e-05	a-c	53.7047	9391	A_IyII_1-3.raw	0/0					4.26172	0	0.0507
High	TRUE		Q8TDL5	Sequest HT (A4)	0.467433	0.000311011	a-c	49.519	8545	A_IyII_1-3.raw	0/0					3.89823	0.001107	0.103
High	TRUE		Q8TDL5	Sequest HT (A4)	-0.106805	-0.000106595	a-c	58.8006	10401	A_IyII_1-3.raw	0/0					2.90986	0.002128	0.1506
High	TRUE		Q8TDL5	Mascot (A2)	1.05514	0.00105307	a-c	50.6317	8770	A_IyII_1-3.raw	8/172	54.19	44	37	0.00116663		0.002414	0.04562
High	TRUE		Q8TDL5	Mascot (A2)	-0.0456494	-4.55598e-05	a-c	53.7047	9391	A_IyII_1-3.raw	6/172	29.84	44	37	0.315253		0.002414	0.06686
High	TRUE		Q8TDL5	Mascot (A2)	1.23861	0.00123618	a-c	55.5881	9771	A_IyII_1-3.raw	11/172	32.76	44	37	0.158052		0.004235	0.1462
High	TRUE		Q8TDL5	Mascot (A2)	0.467433	0.000311011	a-c	49.519	8545	A_IyII_1-3.raw	10/172	19.52	44	37	3.38745		0.004235	0.1569
Sequence	Confidence		Master Protein Accessions	Modifications	Percolator PEP Sequest HT		a-c
QFPEPMPVVLKVR	High		Q8N4F0		0.004411		a-c
Confidence	Checked		Master Protein Accessions	Identifying Node	DeltaM [ppm]	Deltam/z [Da]	a-c	RT [min]	First Scan	Spectrum File	Ions Matched	Ions Score	Identity Strict	Identity Relaxed	Expectation Value	XCorr	Percolator q-Value	Percolator PEP
High	TRUE		Q8N4F0	Sequest HT (A4)	0.934436	0.000479637	a-c	35.2881	5631	A_IyII_1-3.raw	0/0					3.95541	0	0.004411
High	TRUE		Q8N4F0	Mascot (A2)	0.934436	0.000479637	a-c	35.2881	5631	A_IyII_1-3.raw	6/144	33.35	42	36	0.0920601		0	0.01029
Heat shock 70 kDa protein 1 OS=Pongo abelii GN=HSPA1 PE=2 SV=1	Q5R7D3	Pongo abelii	70.009	27.7691	259.041	10	a-c
Sequence	Confidence		Master Protein Accessions	Modifications	Percolator PEP Sequest HT		a-c
RPTELLSNPQFIVDGATR	High		P07384		0.003628		a-c
Confidence	Checked		Master Protein Accessions	Identifying Node	DeltaM [ppm]	Deltam/z [Da]	a-c	RT [min]	First Scan	Spectrum File	Ions Matched	Ions Score	Identity Strict	Identity Relaxed	Expectation Value	XCorr	Percolator q-Value	Percolator PEP
High	TRUE		P07384	Sequest HT (A4)	0.492134	0.000330398	a-c	34.447	5456	A_IyII_1-3.raw	0/0					4.30798	0	0.003628
High	TRUE		P07384	Mascot (A2)	0.492134	0.000330398	a-c	34.447	5456	A_IyII_1-3.raw	9/204	26.33	46	39	0.993629		0.002414	0.05656
Keratin, type II cytoskeletal 6A OS=Homo sapiens GN=KRT6A PE=1 SV=3	P02538	Homo sapiens	60.008	24.6454	110.715	10	a-c
Sequence	Confidence		Master Protein Accessions	Modifications	Percolator PEP Sequest HT		a-c
KPEDWDEEMDGEWEPPVIQNPEYK	High		P52193		0.001233		a-c
Confidence	Checked		Master Protein Accessions	Identifying Node	DeltaM [ppm]	Deltam/z [Da]	a-c	RT [min]	First Scan	Spectrum File	Ions Matched	Ions Score	Identity Strict	Identity Relaxed	Expectation Value	XCorr	Percolator q-Value	Percolator PEP
High	TRUE		P52193	Sequest HT (A4)	-0.0928027	-9.15744e-05	a-c	40.2232	6655	A_IyII_1-3.raw	0/0					5.55443	0	0.001233
High	TRUE		P52193	Mascot (A2)	-0.0928027	-9.15744e-05	a-c	40.2232	6655	A_IyII_1-3.raw	18/276	36.85	40	33	0.0238345		0	0.001035
CKDDEFTHLYTLIVRPNNTYEVK	High		P52193	1xDeamidated [N]; 1xCarbamidomethyl [C1]	0.018		a-c
Confidence	Checked		Master Protein Accessions	Identifying Node	DeltaM [ppm]	Deltam/z [Da]	a-c	RT [min]	First Scan	Spectrum File	Ions Matched	Ions Score	Identity Strict	Identity Relaxed	Expectation Value	XCorr	Percolator q-Value	Percolator PEP
High	TRUE		P52193	Sequest HT (A4)	0.797011	0.000569143	a-c	38.7993	6359	A_IyII_1-3.raw	0/0					5.42383	0	0.02163
High	TRUE		P52193	Mascot (A2)	0.797011	0.000569143	a-c	38.7993	6359	A_IyII_1-3.raw	28/260	26.55	47	40	1.13144		0	0.01556
High	TRUE		P52193	Mascot (A2)	0.797011	0.000569143	a-c	38.7993	6359	A_IyII_1-3.raw	28/260	27.07	47	40	1.00377		0	0.01808
High	TRUE		P52193	Sequest HT (A4)	0.797011	0.000569143	a-c	38.7993	6359	A_IyII_1-3.raw	0/0					5.49622	0	0.018
IDNSQVESGSLEDDWDFLPPKK	High		P52193		0.04214		a-c
Confidence	Checked		Master Protein Accessions	Identifying Node	DeltaM [ppm]	Deltam/z [Da]	a-c	RT [min]	First Scan	Spectrum File	Ions Matched	Ions Score	Identity Strict	Identity Relaxed	Expectation Value	XCorr	Percolator q-Value	Percolator PEP
High	TRUE		P52193	Sequest HT (A4)	0.774908	0.000650714	a-c	39.0865	6420	A_IyII_1-3.raw	0/0					4.93409	0	0.04214
High	TRUE		P52193	Mascot (A2)	0.774908	0.000650714	a-c	39.0865	6420	A_IyII_1-3.raw	12/244	24.81	45	38	1.30859		0.004235	0.1676
KPEDWDEEMDGEWEPPVIQNPEYK	High		P52193	1xOxidation [M9]	0.07593		a-c
Confidence	Checked		Master Protein Accessions	Identifying Node	DeltaM [ppm]	Deltam/z [Da]	a-c	RT [min]	First Scan	Spectrum File	Ions Matched	Ions Score	Identity Strict	Identity Relaxed	Expectation Value	XCorr	Percolator q-Value	Percolator PEP
High	TRUE		P52193	Sequest HT (A4)	3.81046	0.00378035	a-c	37.0757	6003	A_IyII_1-3.raw	0/0					4.54663	0	0.07593
High	TRUE		P52193	Mascot (A2)	3.81046	0.00378035	a-c	37.0757	6003	A_IyII_1-3.raw	12/276	31.33	40	33	0.0844798		0.003589	0.09774
Sequence	Confidence		Master Protein Accessions	Modifications	Percolator PEP Sequest HT		a-c
IDGDKDGFVTVDELKDWIK	High		O43852		0.01393		a-c
Confidence	Checked		Master Protein Accessions	Identifying Node	DeltaM [ppm]	Deltam/z [Da]	a-c	RT [min]	First Scan	Spectrum File	Ions Matched	Ions Score	Identity Strict	Identity Relaxed	Expectation Value	XCorr	Percolator q-Value	Percolator PEP
High	TRUE		O43852	Mascot (A2)	0.858875	0.000470901	a-c	42.1694	7053	A_IyII_1-3.raw	11/200	27.54	46	39	0.87905		0	0.02414
High	TRUE		O43852	Sequest HT (A4)	0.858875	0.000470901	a-c	42.1694	7053	A_IyII_1-3.raw	0/0					5.87995	0	0.01393
Sequence	Confidence		Master Protein Accessions	Modifications	Percolator PEP Sequest HT		a-c
HVIEIHIVHYNSK	High		P23280		0.09667		a-c
Confidence	Checked		Master Protein Accessions	Identifying Node	DeltaM [ppm]	Deltam/z [Da]	a-c	RT [min]	First Scan	Spectrum File	Ions Matched	Ions Score	Identity Strict	Identity Relaxed	Expectation Value	XCorr	Percolator q-Value	Percolator PEP
High	TRUE		P23280	Sequest HT (A4)	1.59624	0.0008454	a-c	22.3165	2963	A_IyII_1-3.raw	0/0					2.68634	0	0.09667
High	TRUE		P23280	Mascot (A2)	1.59624	0.0008454	a-c	22.3165	2963	A_IyII_1-3.raw	11/104	19.24	45	38	4.59462		0.002414	0.08442
Transketolase OS=Pan troglodytes GN=TKT PE=2 SV=1	Q5R1W6	Pan troglodytes	67.797	26.6453	284.26	9	a-c
Sequence	Confidence		Master Protein Accessions	Modifications	Percolator PEP Sequest HT		a-c
EAVNVSLGNLLTYPFVR	High		P46510		0.1755		a-c
Confidence	Checked		Master Protein Accessions	Identifying Node	DeltaM [ppm]	Deltam/z [Da]	a-c	RT [min]	First Scan	Spectrum File	Ions Matched	Ions Score	Identity Strict	Identity Relaxed	Expectation Value	XCorr	Percolator q-Value	Percolator PEP
High	TRUE		P46510	Sequest HT (A4)	1.94174	0.00183691	a-c	66.7378	12001	A_IyII_1-3.raw	0/0					2.59381	0.002128	0.1755
High	TRUE		P46510	Mascot (A2)	1.94174	0.00183691	a-c	66.7378	12001	A_IyII_1-3.raw	5/180	18.43	44	37	4.18445		0.004235	0.1645
Sequence	Confidence		Master Protein Accessions	Modifications	Percolator PEP Sequest HT		a-c
ELLLNLIEYLCK	High		Q90240	1xCarbamidomethyl [C11]	0.07032		a-c
Confidence	Checked		Master Protein Accessions	Identifying Node	DeltaM [ppm]	Deltam/z [Da]	a-c	RT [min]	First Scan	Spectrum File	Ions Matched	Ions Score	Identity Strict	Identity Relaxed	Expectation Value	XCorr	Percolator q-Value	Percolator PEP
High	TRUE		Q90240	Sequest HT (A4)	0.884782	0.000672805	a-c	75.2104	13704	A_IyII_1-3.raw	0/0					1.9335	0	0.07032
High	TRUE		Q90240	Mascot (A2)	0.884782	0.000672805	a-c	75.2104	13704	A_IyII_1-3.raw	6/116	27.98	44	37	0.408959		0.001533	0.02949
Keratin, type II cytoskeletal 2 epidermal OS=Homo sapiens GN=KRT2 PE=1 SV=2	P35908	Homo sapiens	65.393	28.169	249.51	8	a-c
Sequence	Confidence	Homo sapiens	Master Protein Accessions	Modifications	Percolator PEP Sequest HT		a-c
AREGSEEDLDALEHMFR	High	Homo sapiens	P31944		0.01214		a-c
Confidence	Checked	Homo sapiens	Master Protein Accessions	Identifying Node	DeltaM [ppm]	Deltam/z [Da]	a-c	RT [min]	First Scan	Spectrum File	Ions Matched	Ions Score	Identity Strict	Identity Relaxed	Expectation Value	XCorr	Percolator q-Value	Percolator PEP
High	TRUE	Homo sapiens	P31944	Mascot (A2)	0.609297	0.000305396	a-c	36.8283	5951	A_IyII_1-3.raw	9/188	25.05	42	35	0.591454		0	0.002572
High	TRUE	Homo sapiens	P31944	Sequest HT (A4)	0.609297	0.000305396	a-c	36.8283	5951	A_IyII_1-3.raw	0/0					3.67145	0	0.01214
GSCFIQTLVDVFTK	High	Homo sapiens	P31944	1xCarbamidomethyl [C3]	0.01261		a-c
Confidence	Checked	Homo sapiens	Master Protein Accessions	Identifying Node	DeltaM [ppm]	Deltam/z [Da]	a-c	RT [min]	First Scan	Spectrum File	Ions Matched	Ions Score	Identity Strict	Identity Relaxed	Expectation Value	XCorr	Percolator q-Value	Percolator PEP
High	TRUE	Homo sapiens	P31944	Sequest HT (A4)	1.14776	0.000926716	a-c	73.7291	13412	A_IyII_1-3.raw	0/0					2.75552	0	0.01261
High	TRUE	Homo sapiens	P31944	Mascot (A2)	1.14776	0.000926716	a-c	73.7291	13412	A_IyII_1-3.raw	8/136	36.31	45	38	0.0920216		0	0.009806
EDPVSCAFVVLMAHGR	High	Homo sapiens	P31944	1xCarbamidomethyl [C6]	0.01312		a-c
Confidence	Checked	Homo sapiens	Master Protein Accessions	Identifying Node	DeltaM [ppm]	Deltam/z [Da]	a-c	RT [min]	First Scan	Spectrum File	Ions Matched	Ions Score	Identity Strict	Identity Relaxed	Expectation Value	XCorr	Percolator q-Value	Percolator PEP
High	TRUE	Homo sapiens	P31944	Sequest HT (A4)	1.8708	0.00111491	a-c	46.9056	8018	A_IyII_1-3.raw	0/0					3.34001	0	0.01312
High	TRUE	Homo sapiens	P31944	Mascot (A2)	1.8708	0.00111491	a-c	46.9056	8018	A_IyII_1-3.raw	6/120	19.42	45	38	3.69435		0	0.01808
MAEAELVQEGK	High	Homo sapiens	P31944		0.08846		a-c
Confidence	Checked	Homo sapiens	Master Protein Accessions	Identifying Node	DeltaM [ppm]	Deltam/z [Da]	a-c	RT [min]	First Scan	Spectrum File	Ions Matched	Ions Score	Identity Strict	Identity Relaxed	Expectation Value	XCorr	Percolator q-Value	Percolator PEP
High	TRUE	Homo sapiens	P31944	Sequest HT (A4)	0.913587	0.000550248	a-c	23.4923	3201	A_IyII_1-3.raw	0/0					2.34247	0	0.08846
High	TRUE	Homo sapiens	P31944	Mascot (A2)	0.913587	0.000550248	a-c	23.4923	3201	A_IyII_1-3.raw	7/92	40.45	45	38	0.0293461		0.002414	0.05658
Lactotransferrin OS=Homo sapiens GN=LTF PE=1 SV=6	P02788	Homo sapiens	78.132	10.8451	334.949	8	a-c
Sequence	Confidence	Homo sapiens	Master Protein Accessions	Modifications	Percolator PEP Sequest HT		a-c
GFFEVTHDVSQLTCADFLR	High	Homo sapiens	P55307	1xDeamidated [Q11]; 1xCarbamidomethyl [C14]			a-c
Confidence	Checked	Homo sapiens	Master Protein Accessions	Identifying Node	DeltaM [ppm]	Deltam/z [Da]	a-c	RT [min]	First Scan	Spectrum File	Ions Matched	Ions Score	Identity Strict	Identity Relaxed	Expectation Value	XCorr	Percolator q-Value	Percolator PEP
High	TRUE	Homo sapiens	P55307	Mascot (A2)	0.267933	0.000200329	a-c	61.5615	10958	A_IyII_1-3.raw	9/176	13.69	44	38	13.5174		0	0.02518
Nucleobindin-1 OS=Homo sapiens GN=NUCB1 PE=1 SV=4	Q02818	Homo sapiens	53.846	22.9935	67.2367	8	a-c
Sequence	Confidence	Homo sapiens	Master Protein Accessions	Modifications	Percolator PEP Sequest HT		a-c
ADVLTTGAGNPVGDKLNVITAGPR	High	Homo sapiens	Q2I6W4		0.00134		a-c
Confidence	Checked	Homo sapiens	Master Protein Accessions	Identifying Node	DeltaM [ppm]	Deltam/z [Da]	a-c	RT [min]	First Scan	Spectrum File	Ions Matched	Ions Score	Identity Strict	Identity Relaxed	Expectation Value	XCorr	Percolator q-Value	Percolator PEP
High	TRUE	Homo sapiens	Q2I6W4	Sequest HT (A4)	1.0544	0.000821119	a-c	34.9885	5569	A_IyII_1-3.raw	0/0					7.20892	0	0.00134
High	TRUE	Homo sapiens	Q2I6W4	Mascot (A2)	1.0544	0.000821119	a-c	34.9885	5569	A_IyII_1-3.raw	23/240	61.34	44	37	0.000207757		0	0.0007357
High	TRUE	Homo sapiens	Q2I6W4	Sequest HT (A4)	1.4144	0.0008261	a-c	35.0482	5581	A_IyII_1-3.raw	0/0					3.40137	0	0.04166
High	TRUE	Homo sapiens	Q2I6W4	Mascot (A2)	1.4144	0.0008261	a-c	35.0482	5581	A_IyII_1-3.raw	23/240	39.07	44	37	0.0357455		0	0.008866
GPLLVQDVVFTDEMAHFDRER	High	Homo sapiens	Q5RF10; Q2I6W4		0.01651		a-c
Confidence	Checked	Homo sapiens	Master Protein Accessions	Identifying Node	DeltaM [ppm]	Deltam/z [Da]	a-c	RT [min]	First Scan	Spectrum File	Ions Matched	Ions Score	Identity Strict	Identity Relaxed	Expectation Value	XCorr	Percolator q-Value	Percolator PEP
High	TRUE	Homo sapiens	Q5RF10; Q2I6W4	Sequest HT (A4)	1.14373	0.000943275	a-c	41.1187	6839	A_IyII_1-3.raw	0/0					3.60026	0	0.005465
High	TRUE	Homo sapiens	Q5RF10; Q2I6W4	Mascot (A2)	1.14373	0.000943275	a-c	41.1187	6839	A_IyII_1-3.raw	9/220	27.88	46	39	0.775708		0	0.002366
High	TRUE	Homo sapiens	Q5RF10; Q2I6W4	Sequest HT (A4)	0.792934	0.000490472	a-c	41.0989	6835	A_IyII_1-3.raw	0/0					4.63531	0	0.01651
High	TRUE	Homo sapiens	Q5RF10; Q2I6W4	Mascot (A2)	0.792934	0.000490472	a-c	41.0989	6835	A_IyII_1-3.raw	12/220	39.09	46	39	0.0602187		0	0.00203
LCENIAGHLKDAQIFIQK	High	Homo sapiens	Q5RF10; Q2I6W4	1xCarbamidomethyl [C2]	0.002992		a-c
Confidence	Checked	Homo sapiens	Master Protein Accessions	Identifying Node	DeltaM [ppm]	Deltam/z [Da]	a-c	RT [min]	First Scan	Spectrum File	Ions Matched	Ions Score	Identity Strict	Identity Relaxed	Expectation Value	XCorr	Percolator q-Value	Percolator PEP
High	TRUE	Homo sapiens	Q2I6W4	Sequest HT (A4)	0.629707	0.000330299	a-c	33.3748	5232	A_IyII_1-3.raw	0/0					5.44692	0	0.002992
High	TRUE	Homo sapiens	Q5RF10	Sequest HT (A4)	0.629707	0.000330299	a-c	33.3748	5232	A_IyII_1-3.raw	0/0					5.44692	0	0.002992
High	TRUE	Homo sapiens	Q2I6W4	Mascot (A2)	0.629707	0.000330299	a-c	33.3748	5232	A_IyII_1-3.raw	12/192	38.13	46	39	0.0636873		0	0.001
High	TRUE	Homo sapiens	Q5RF10	Mascot (A2)	0.629707	0.000330299	a-c	33.3748	5232	A_IyII_1-3.raw	12/192	38.13	46	39	0.0636873		0	0.001
GAGAFGYFEVTHDITKYSK	High	Homo sapiens	Q5RF10; Q2I6W4		0.01776		a-c
Confidence	Checked	Homo sapiens	Master Protein Accessions	Identifying Node	DeltaM [ppm]	Deltam/z [Da]	a-c	RT [min]	First Scan	Spectrum File	Ions Matched	Ions Score	Identity Strict	Identity Relaxed	Expectation Value	XCorr	Percolator q-Value	Percolator PEP
High	TRUE	Homo sapiens	Q5RF10; Q2I6W4	Sequest HT (A4)	0.830675	0.000434239	a-c	34.3121	5428	A_IyII_1-3.raw	0/0					3.97608	0	0.01776
High	TRUE	Homo sapiens	Q5RF10; Q2I6W4	Mascot (A2)	0.830675	0.000434239	a-c	34.3121	5428	A_IyII_1-3.raw	19/156	19.35	46	39	5.45997		0.001533	0.02778
GPLLVQDVVFTDEMAHFDRER	High	Homo sapiens	Q5RF10; Q2I6W4	1xOxidation [M14]	0.005001		a-c
Confidence	Checked	Homo sapiens	Master Protein Accessions	Identifying Node	DeltaM [ppm]	Deltam/z [Da]	a-c	RT [min]	First Scan	Spectrum File	Ions Matched	Ions Score	Identity Strict	Identity Relaxed	Expectation Value	XCorr	Percolator q-Value	Percolator PEP
High	TRUE	Homo sapiens	Q5RF10; Q2I6W4	Sequest HT (A4)	0.770993	0.000479983	a-c	36.8652	5959	A_IyII_1-3.raw	0/0					4.22881	0	0.005001
High	TRUE	Homo sapiens	Q5RF10; Q2I6W4	Mascot (A2)	0.770993	0.000479983	a-c	36.8652	5959	A_IyII_1-3.raw	19/220	39.03	46	39	0.0595811		0	0.001531
DPILFPSFIHSQK	High	Homo sapiens	Q5RF10; Q2I6W4		0.006111		a-c
Confidence	Checked	Homo sapiens	Master Protein Accessions	Identifying Node	DeltaM [ppm]	Deltam/z [Da]	a-c	RT [min]	First Scan	Spectrum File	Ions Matched	Ions Score	Identity Strict	Identity Relaxed	Expectation Value	XCorr	Percolator q-Value	Percolator PEP
High	TRUE	Homo sapiens	Q5RF10; Q2I6W4	Sequest HT (A4)	0.771791	0.000393309	a-c	39.8282	6573	A_IyII_1-3.raw	0/0					3.79847	0	0.006111
High	TRUE	Homo sapiens	Q5RF10; Q2I6W4	Mascot (A2)	0.771791	0.000393309	a-c	39.8282	6573	A_IyII_1-3.raw	11/100	35.44	45	38	0.107703		0	0.003044
ADVLTTGAGNPVGDK	High	Homo sapiens	Q5RF10; Q2I6W4		0.01699		a-c
Confidence	Checked	Homo sapiens	Master Protein Accessions	Identifying Node	DeltaM [ppm]	Deltam/z [Da]	a-c	RT [min]	First Scan	Spectrum File	Ions Matched	Ions Score	Identity Strict	Identity Relaxed	Expectation Value	XCorr	Percolator q-Value	Percolator PEP
High	TRUE	Homo sapiens	Q5RF10; Q2I6W4	Sequest HT (A4)	0.49105	0.000347348	a-c	25.4086	3589	A_IyII_1-3.raw	0/0					3.59679	0	0.01699
High	TRUE	Homo sapiens	Q5RF10; Q2I6W4	Mascot (A2)	0.49105	0.000347348	a-c	25.4086	3589	A_IyII_1-3.raw	9/132	45.64	44	37	0.00755927		0	0.009776
IQALLDKYNAEKPK	High	Homo sapiens	Q5RF10; Q2I6W4		0.02433		a-c
Confidence	Checked	Homo sapiens	Master Protein Accessions	Identifying Node	DeltaM [ppm]	Deltam/z [Da]	a-c	RT [min]	First Scan	Spectrum File	Ions Matched	Ions Score	Identity Strict	Identity Relaxed	Expectation Value	XCorr	Percolator q-Value	Percolator PEP
High	TRUE	Homo sapiens	Q5RF10; Q2I6W4	Sequest HT (A4)	-0.0761098	-3.10322e-05	a-c	22.7733	3056	A_IyII_1-3.raw	0/0					2.18344	0	0.02433
High	TRUE	Homo sapiens	Q5RF10; Q2I6W4	Mascot (A2)	-0.0761098	-3.10322e-05	a-c	22.7733	3056	A_IyII_1-3.raw	12/152	30.22	44	37	0.251863		0.002414	0.07958
NPVNYFAEVEQIAFDPSNMPPGIEASPDK	High	Homo sapiens	Q5RF10; Q2I6W4	1xOxidation [M19]	0.01971		a-c
Confidence	Checked	Homo sapiens	Master Protein Accessions	Identifying Node	DeltaM [ppm]	Deltam/z [Da]	a-c	RT [min]	First Scan	Spectrum File	Ions Matched	Ions Score	Identity Strict	Identity Relaxed	Expectation Value	XCorr	Percolator q-Value	Percolator PEP
High	TRUE	Homo sapiens	Q5RF10; Q2I6W4	Sequest HT (A4)	0.912829	0.000971397	a-c	68.8122	12422	A_IyII_1-3.raw	0/0					5.08909	0	0.01971
High	TRUE	Homo sapiens	Q5RF10; Q2I6W4	Mascot (A2)	0.912829	0.000971397	a-c	68.8122	12422	A_IyII_1-3.raw	18/336	20.05	45	38	3.43868		0.004235	0.1127
NAIHTFVQSGSHLAAR	High	Homo sapiens	Q5RF10; Q2I6W4	1xDeamidated [N1]	0.0001979		a-c
Confidence	Checked	Homo sapiens	Master Protein Accessions	Identifying Node	DeltaM [ppm]	Deltam/z [Da]	a-c	RT [min]	First Scan	Spectrum File	Ions Matched	Ions Score	Identity Strict	Identity Relaxed	Expectation Value	XCorr	Percolator q-Value	Percolator PEP
High	TRUE	Homo sapiens	Q5RF10; Q2I6W4	Sequest HT (A4)	0.539494	0.000307489	a-c	29.1662	4356	A_IyII_1-3.raw	0/0					5.42547	0	0.0001979
High	TRUE	Homo sapiens	Q5RF10; Q2I6W4	Mascot (A2)	0.539494	0.000307489	a-c	29.1662	4356	A_IyII_1-3.raw	10/180	50.93	46	39	0.00368543		0	8.662e-05
NAIHTFVQSGSHLAAR	High	Homo sapiens	Q5RF10; Q2I6W4		0.01188		a-c
Confidence	Checked	Homo sapiens	Master Protein Accessions	Identifying Node	DeltaM [ppm]	Deltam/z [Da]	a-c	RT [min]	First Scan	Spectrum File	Ions Matched	Ions Score	Identity Strict	Identity Relaxed	Expectation Value	XCorr	Percolator q-Value	Percolator PEP
High	TRUE	Homo sapiens	Q5RF10; Q2I6W4	Sequest HT (A4)	0.758323	0.000431963	a-c	24.1552	3335	A_IyII_1-3.raw	0/0					3.87071	0	0.01188
High	TRUE	Homo sapiens	Q5RF10; Q2I6W4	Mascot (A2)	0.758323	0.000431963	a-c	24.1552	3335	A_IyII_1-3.raw	12/180	24.84	46	39	1.5199		0	0.01636
FNTANDDNVTQVR	High	Homo sapiens	Q2I6W4	1xDeamidated [N5]	0.004549		a-c
Confidence	Checked	Homo sapiens	Master Protein Accessions	Identifying Node	DeltaM [ppm]	Deltam/z [Da]	a-c	RT [min]	First Scan	Spectrum File	Ions Matched	Ions Score	Identity Strict	Identity Relaxed	Expectation Value	XCorr	Percolator q-Value	Percolator PEP
High	TRUE	Homo sapiens	Q2I6W4	Sequest HT (A4)	0.249321	0.000186328	a-c	23.6257	3228	A_IyII_1-3.raw	0/0					3.81586	0	0.004549
High	TRUE	Homo sapiens	Q2I6W4	Mascot (A2)	0.249321	0.000186328	a-c	23.6257	3228	A_IyII_1-3.raw	9/140	80.05	43	36	2.01022e-06		0	0.0007686
GPLLVQDVVFTDEMAHFDR	High	Homo sapiens	Q5RF10; Q2I6W4		0.001452		a-c
Confidence	Checked	Homo sapiens	Master Protein Accessions	Identifying Node	DeltaM [ppm]	Deltam/z [Da]	a-c	RT [min]	First Scan	Spectrum File	Ions Matched	Ions Score	Identity Strict	Identity Relaxed	Expectation Value	XCorr	Percolator q-Value	Percolator PEP
High	TRUE	Homo sapiens	Q5RF10; Q2I6W4	Sequest HT (A4)	0.942675	0.00068786	a-c	46.012	7837	A_IyII_1-3.raw	0/0					3.76274	0	0.001452
High	TRUE	Homo sapiens	Q5RF10; Q2I6W4	Mascot (A2)	0.942675	0.00068786	a-c	46.012	7837	A_IyII_1-3.raw	12/196	26.68	46	39	1.01657		0	0.001633
AAQKADVLTTGAGNPVGDKLNVITAGPR	High	Homo sapiens	Q2I6W4		9.504e-05		a-c
Confidence	Checked	Homo sapiens	Master Protein Accessions	Identifying Node	DeltaM [ppm]	Deltam/z [Da]	a-c	RT [min]	First Scan	Spectrum File	Ions Matched	Ions Score	Identity Strict	Identity Relaxed	Expectation Value	XCorr	Percolator q-Value	Percolator PEP
High	TRUE	Homo sapiens	Q2I6W4	Sequest HT (A4)	1.3975	0.00127381	a-c	31.256	4789	A_IyII_1-3.raw	0/0					7.82605	0	9.504e-05
High	TRUE	Homo sapiens	Q2I6W4	Sequest HT (A4)	1.03545	0.000707856	a-c	31.2455	4787	A_IyII_1-3.raw	0/0					5.65746	0	0.0007498
High	TRUE	Homo sapiens	Q2I6W4	Mascot (A2)	1.03545	0.000707856	a-c	31.2455	4787	A_IyII_1-3.raw	13/316	40.46	43	36	0.0182778		0	0.000475
High	TRUE	Homo sapiens	Q2I6W4	Mascot (A2)	1.3975	0.00127381	a-c	31.256	4789	A_IyII_1-3.raw	22/316	54.68	43	36	0.000690178		0	0.0001024
LCENIAGHLKDAQLFIQKK	High	Homo sapiens	Q5RF10; Q2I6W4	1xCarbamidomethyl [C2]	0.08701		a-c
Confidence	Checked	Homo sapiens	Master Protein Accessions	Identifying Node	DeltaM [ppm]	Deltam/z [Da]	a-c	RT [min]	First Scan	Spectrum File	Ions Matched	Ions Score	Identity Strict	Identity Relaxed	Expectation Value	XCorr	Percolator q-Value	Percolator PEP
High	TRUE	Homo sapiens	Q5RF10	Sequest HT (A4)	1.14528	0.00063741	a-c	31.0896	4754	A_IyII_1-3.raw	0/0					3.41879	0	0.08701
High	TRUE	Homo sapiens	Q2I6W4	Sequest HT (A4)	1.14528	0.00063741	a-c	31.0896	4754	A_IyII_1-3.raw	0/0					3.41879	0	0.08701
High	TRUE	Homo sapiens	Q5RF10	Mascot (A2)	1.14528	0.00063741	a-c	31.0896	4754	A_IyII_1-3.raw	16/204	24.24	44	37	1.09169		0.001533	0.031
High	TRUE	Homo sapiens	Q2I6W4	Mascot (A2)	1.14528	0.00063741	a-c	31.0896	4754	A_IyII_1-3.raw	16/204	24.24	44	37	1.09169		0.001533	0.031
LSQEDPDYGLR	High	Homo sapiens	Q5RF10; Q2I6W4		0.2449		a-c
Confidence	Checked	Homo sapiens	Master Protein Accessions	Identifying Node	DeltaM [ppm]	Deltam/z [Da]	a-c	RT [min]	First Scan	Spectrum File	Ions Matched	Ions Score	Identity Strict	Identity Relaxed	Expectation Value	XCorr	Percolator q-Value	Percolator PEP
High	TRUE	Homo sapiens	Q2I6W4	Mascot (A2)	0.771854	0.000498854	a-c	25.1269	3532	A_IyII_1-3.raw	5/112	35.16	43	37	0.0764869		0.002414	0.08789
High	TRUE	Homo sapiens	Q5RF10	Mascot (A2)	0.771854	0.000498854	a-c	25.1269	3532	A_IyII_1-3.raw	5/112	35.16	43	37	0.0764869		0.002414	0.08789
IQALLDKYNAEKPKNAIHTFVQSGSHLAAR	High	Homo sapiens	Q5RF10; Q2I6W4	1xDeamidated [N9]	0.1495		a-c
Confidence	Checked	Homo sapiens	Master Protein Accessions	Identifying Node	DeltaM [ppm]	Deltam/z [Da]	a-c	RT [min]	First Scan	Spectrum File	Ions Matched	Ions Score	Identity Strict	Identity Relaxed	Expectation Value	XCorr	Percolator q-Value	Percolator PEP
High	TRUE	Homo sapiens	Q5RF10; Q2I6W4	Sequest HT (A4)	0.448179	0.000248125	a-c	31.4382	4828	A_IyII_1-3.raw	0/0					2.84665	0.002128	0.1495
Plastin-2 OS=Homo sapiens GN=LCP1 PE=1 SV=6	P13796	Homo sapiens	70.244	22.1691	117.133	8	a-c
Sequence	Confidence	Homo sapiens	Master Protein Accessions	Modifications	Percolator PEP Sequest HT		a-c
GPLLVQDVVFTDEMAHFDRER	High	Homo sapiens	Q5RF10; Q2I6W4		0.01651		a-c
Confidence	Checked	Homo sapiens	Master Protein Accessions	Identifying Node	DeltaM [ppm]	Deltam/z [Da]	a-c	RT [min]	First Scan	Spectrum File	Ions Matched	Ions Score	Identity Strict	Identity Relaxed	Expectation Value	XCorr	Percolator q-Value	Percolator PEP
High	TRUE	Homo sapiens	Q5RF10; Q2I6W4	Sequest HT (A4)	1.14373	0.000943275	a-c	41.1187	6839	A_IyII_1-3.raw	0/0					3.60026	0	0.005465
High	TRUE	Homo sapiens	Q5RF10; Q2I6W4	Mascot (A2)	1.14373	0.000943275	a-c	41.1187	6839	A_IyII_1-3.raw	9/220	27.88	46	39	0.775708		0	0.002366
High	TRUE	Homo sapiens	Q5RF10; Q2I6W4	Sequest HT (A4)	0.792934	0.000490472	a-c	41.0989	6835	A_IyII_1-3.raw	0/0					4.63531	0	0.01651
High	TRUE	Homo sapiens	Q5RF10; Q2I6W4	Mascot (A2)	0.792934	0.000490472	a-c	41.0989	6835	A_IyII_1-3.raw	12/220	39.09	46	39	0.0602187		0	0.00203
LCENIAGHLKDAQIFIQK	High	Homo sapiens	Q5RF10; Q2I6W4	1xCarbamidomethyl [C2]	0.002992		a-c
Confidence	Checked	Homo sapiens	Master Protein Accessions	Identifying Node	DeltaM [ppm]	Deltam/z [Da]	a-c	RT [min]	First Scan	Spectrum File	Ions Matched	Ions Score	Identity Strict	Identity Relaxed	Expectation Value	XCorr	Percolator q-Value	Percolator PEP
High	TRUE	Homo sapiens	Q2I6W4	Sequest HT (A4)	0.629707	0.000330299	a-c	33.3748	5232	A_IyII_1-3.raw	0/0					5.44692	0	0.002992
High	TRUE	Homo sapiens	Q5RF10	Sequest HT (A4)	0.629707	0.000330299	a-c	33.3748	5232	A_IyII_1-3.raw	0/0					5.44692	0	0.002992
High	TRUE	Homo sapiens	Q2I6W4	Mascot (A2)	0.629707	0.000330299	a-c	33.3748	5232	A_IyII_1-3.raw	12/192	38.13	46	39	0.0636873		0	0.001
High	TRUE	Homo sapiens	Q5RF10	Mascot (A2)	0.629707	0.000330299	a-c	33.3748	5232	A_IyII_1-3.raw	12/192	38.13	46	39	0.0636873		0	0.001
LGPNYLHIPVNCPYR	High	Homo sapiens	Q5RF10	1xCarbamidomethyl [C12]	0.001309		a-c
Confidence	Checked	Homo sapiens	Master Protein Accessions	Identifying Node	DeltaM [ppm]	Deltam/z [Da]	a-c	RT [min]	First Scan	Spectrum File	Ions Matched	Ions Score	Identity Strict	Identity Relaxed	Expectation Value	XCorr	Percolator q-Value	Percolator PEP
High	TRUE	Homo sapiens	Q5RF10	Mascot (A2)	1.09712	0.000662999	a-c	33.0333	5162	A_IyII_1-3.raw	8/156	36.58	46	39	0.0896177		0	0.0002304
High	TRUE	Homo sapiens	Q5RF10	Sequest HT (A4)	1.09712	0.000662999	a-c	33.0333	5162	A_IyII_1-3.raw	0/0					4.85286	0	0.001309
GAGAFGYFEVTHDITKYSK	High	Homo sapiens	Q5RF10; Q2I6W4		0.01776		a-c
Confidence	Checked	Homo sapiens	Master Protein Accessions	Identifying Node	DeltaM [ppm]	Deltam/z [Da]	a-c	RT [min]	First Scan	Spectrum File	Ions Matched	Ions Score	Identity Strict	Identity Relaxed	Expectation Value	XCorr	Percolator q-Value	Percolator PEP
High	TRUE	Homo sapiens	Q5RF10; Q2I6W4	Sequest HT (A4)	0.830675	0.000434239	a-c	34.3121	5428	A_IyII_1-3.raw	0/0					3.97608	0	0.01776
High	TRUE	Homo sapiens	Q5RF10; Q2I6W4	Mascot (A2)	0.830675	0.000434239	a-c	34.3121	5428	A_IyII_1-3.raw	19/156	19.35	46	39	5.45997		0.001533	0.02778
GPLLVQDVVFTDEMAHFDRER	High	Homo sapiens	Q5RF10; Q2I6W4	1xOxidation [M14]	0.005001		a-c
Confidence	Checked	Homo sapiens	Master Protein Accessions	Identifying Node	DeltaM [ppm]	Deltam/z [Da]	a-c	RT [min]	First Scan	Spectrum File	Ions Matched	Ions Score	Identity Strict	Identity Relaxed	Expectation Value	XCorr	Percolator q-Value	Percolator PEP
High	TRUE	Homo sapiens	Q5RF10; Q2I6W4	Sequest HT (A4)	0.770993	0.000479983	a-c	36.8652	5959	A_IyII_1-3.raw	0/0					4.22881	0	0.005001
High	TRUE	Homo sapiens	Q5RF10; Q2I6W4	Mascot (A2)	0.770993	0.000479983	a-c	36.8652	5959	A_IyII_1-3.raw	19/220	39.03	46	39	0.0595811		0	0.001531
DPILFPSFIHSQK	High	Homo sapiens	Q5RF10; Q2I6W4		0.006111		a-c
Confidence	Checked	Homo sapiens	Master Protein Accessions	Identifying Node	DeltaM [ppm]	Deltam/z [Da]	a-c	RT [min]	First Scan	Spectrum File	Ions Matched	Ions Score	Identity Strict	Identity Relaxed	Expectation Value	XCorr	Percolator q-Value	Percolator PEP
High	TRUE	Homo sapiens	Q5RF10; Q2I6W4	Sequest HT (A4)	0.771791	0.000393309	a-c	39.8282	6573	A_IyII_1-3.raw	0/0					3.79847	0	0.006111
High	TRUE	Homo sapiens	Q5RF10; Q2I6W4	Mascot (A2)	0.771791	0.000393309	a-c	39.8282	6573	A_IyII_1-3.raw	11/100	35.44	45	38	0.107703		0	0.003044
ADVLTTGAGNPVGDK	High	Homo sapiens	Q5RF10; Q2I6W4		0.01699		a-c
Confidence	Checked	Homo sapiens	Master Protein Accessions	Identifying Node	DeltaM [ppm]	Deltam/z [Da]	a-c	RT [min]	First Scan	Spectrum File	Ions Matched	Ions Score	Identity Strict	Identity Relaxed	Expectation Value	XCorr	Percolator q-Value	Percolator PEP
High	TRUE	Homo sapiens	Q5RF10; Q2I6W4	Sequest HT (A4)	0.49105	0.000347348	a-c	25.4086	3589	A_IyII_1-3.raw	0/0					3.59679	0	0.01699
High	TRUE	Homo sapiens	Q5RF10; Q2I6W4	Mascot (A2)	0.49105	0.000347348	a-c	25.4086	3589	A_IyII_1-3.raw	9/132	45.64	44	37	0.00755927		0	0.009776
IQALLDKYNAEKPK	High	Homo sapiens	Q5RF10; Q2I6W4		0.02433		a-c
Confidence	Checked	Homo sapiens	Master Protein Accessions	Identifying Node	DeltaM [ppm]	Deltam/z [Da]	a-c	RT [min]	First Scan	Spectrum File	Ions Matched	Ions Score	Identity Strict	Identity Relaxed	Expectation Value	XCorr	Percolator q-Value	Percolator PEP
High	TRUE	Homo sapiens	Q5RF10; Q2I6W4	Sequest HT (A4)	-0.0761098	-3.10322e-05	a-c	22.7733	3056	A_IyII_1-3.raw	0/0					2.18344	0	0.02433
High	TRUE	Homo sapiens	Q5RF10; Q2I6W4	Mascot (A2)	-0.0761098	-3.10322e-05	a-c	22.7733	3056	A_IyII_1-3.raw	12/152	30.22	44	37	0.251863		0.002414	0.07958
NPVNYFAEVEQIAFDPSNMPPGIEASPDK	High	Homo sapiens	Q5RF10; Q2I6W4	1xOxidation [M19]	0.01971		a-c
Confidence	Checked	Homo sapiens	Master Protein Accessions	Identifying Node	DeltaM [ppm]	Deltam/z [Da]	a-c	RT [min]	First Scan	Spectrum File	Ions Matched	Ions Score	Identity Strict	Identity Relaxed	Expectation Value	XCorr	Percolator q-Value	Percolator PEP
High	TRUE	Homo sapiens	Q5RF10; Q2I6W4	Sequest HT (A4)	0.912829	0.000971397	a-c	68.8122	12422	A_IyII_1-3.raw	0/0					5.08909	0	0.01971
High	TRUE	Homo sapiens	Q5RF10; Q2I6W4	Mascot (A2)	0.912829	0.000971397	a-c	68.8122	12422	A_IyII_1-3.raw	18/336	20.05	45	38	3.43868		0.004235	0.1127
NAIHTFVQSGSHLAAR	High	Homo sapiens	Q5RF10; Q2I6W4	1xDeamidated [N1]	0.0001979		a-c
Confidence	Checked	Homo sapiens	Master Protein Accessions	Identifying Node	DeltaM [ppm]	Deltam/z [Da]	a-c	RT [min]	First Scan	Spectrum File	Ions Matched	Ions Score	Identity Strict	Identity Relaxed	Expectation Value	XCorr	Percolator q-Value	Percolator PEP
High	TRUE	Homo sapiens	Q5RF10; Q2I6W4	Sequest HT (A4)	0.539494	0.000307489	a-c	29.1662	4356	A_IyII_1-3.raw	0/0					5.42547	0	0.0001979
High	TRUE	Homo sapiens	Q5RF10; Q2I6W4	Mascot (A2)	0.539494	0.000307489	a-c	29.1662	4356	A_IyII_1-3.raw	10/180	50.93	46	39	0.00368543		0	8.662e-05
NAIHTFVQSGSHLAAR	High	Homo sapiens	Q5RF10; Q2I6W4		0.01188		a-c
Confidence	Checked	Homo sapiens	Master Protein Accessions	Identifying Node	DeltaM [ppm]	Deltam/z [Da]	a-c	RT [min]	First Scan	Spectrum File	Ions Matched	Ions Score	Identity Strict	Identity Relaxed	Expectation Value	XCorr	Percolator q-Value	Percolator PEP
High	TRUE	Homo sapiens	Q5RF10; Q2I6W4	Sequest HT (A4)	0.758323	0.000431963	a-c	24.1552	3335	A_IyII_1-3.raw	0/0					3.87071	0	0.01188
High	TRUE	Homo sapiens	Q5RF10; Q2I6W4	Mascot (A2)	0.758323	0.000431963	a-c	24.1552	3335	A_IyII_1-3.raw	12/180	24.84	46	39	1.5199		0	0.01636
GPLLVQDVVFTDEMAHFDR	High	Homo sapiens	Q5RF10; Q2I6W4		0.001452		a-c
Confidence	Checked	Homo sapiens	Master Protein Accessions	Identifying Node	DeltaM [ppm]	Deltam/z [Da]	a-c	RT [min]	First Scan	Spectrum File	Ions Matched	Ions Score	Identity Strict	Identity Relaxed	Expectation Value	XCorr	Percolator q-Value	Percolator PEP
High	TRUE	Homo sapiens	Q5RF10; Q2I6W4	Sequest HT (A4)	0.942675	0.00068786	a-c	46.012	7837	A_IyII_1-3.raw	0/0					3.76274	0	0.001452
High	TRUE	Homo sapiens	Q5RF10; Q2I6W4	Mascot (A2)	0.942675	0.00068786	a-c	46.012	7837	A_IyII_1-3.raw	12/196	26.68	46	39	1.01657		0	0.001633
LCENIAGHLKDAQLFIQKK	High	Homo sapiens	Q5RF10; Q2I6W4	1xCarbamidomethyl [C2]	0.08701		a-c
Confidence	Checked	Homo sapiens	Master Protein Accessions	Identifying Node	DeltaM [ppm]	Deltam/z [Da]	a-c	RT [min]	First Scan	Spectrum File	Ions Matched	Ions Score	Identity Strict	Identity Relaxed	Expectation Value	XCorr	Percolator q-Value	Percolator PEP
High	TRUE	Homo sapiens	Q5RF10	Sequest HT (A4)	1.14528	0.00063741	a-c	31.0896	4754	A_IyII_1-3.raw	0/0					3.41879	0	0.08701
High	TRUE	Homo sapiens	Q2I6W4	Sequest HT (A4)	1.14528	0.00063741	a-c	31.0896	4754	A_IyII_1-3.raw	0/0					3.41879	0	0.08701
High	TRUE	Homo sapiens	Q5RF10	Mascot (A2)	1.14528	0.00063741	a-c	31.0896	4754	A_IyII_1-3.raw	16/204	24.24	44	37	1.09169		0.001533	0.031
High	TRUE	Homo sapiens	Q2I6W4	Mascot (A2)	1.14528	0.00063741	a-c	31.0896	4754	A_IyII_1-3.raw	16/204	24.24	44	37	1.09169		0.001533	0.031
LSQEDPDYGLR	High	Homo sapiens	Q5RF10; Q2I6W4		0.2449		a-c
Confidence	Checked	Homo sapiens	Master Protein Accessions	Identifying Node	DeltaM [ppm]	Deltam/z [Da]	a-c	RT [min]	First Scan	Spectrum File	Ions Matched	Ions Score	Identity Strict	Identity Relaxed	Expectation Value	XCorr	Percolator q-Value	Percolator PEP
High	TRUE	Homo sapiens	Q2I6W4	Mascot (A2)	0.771854	0.000498854	a-c	25.1269	3532	A_IyII_1-3.raw	5/112	35.16	43	37	0.0764869		0.002414	0.08789
High	TRUE	Homo sapiens	Q5RF10	Mascot (A2)	0.771854	0.000498854	a-c	25.1269	3532	A_IyII_1-3.raw	5/112	35.16	43	37	0.0764869		0.002414	0.08789
IQALLDKYNAEKPKNAIHTFVQSGSHLAAR	High	Homo sapiens	Q5RF10; Q2I6W4	1xDeamidated [N9]	0.1495		a-c
Confidence	Checked	Homo sapiens	Master Protein Accessions	Identifying Node	DeltaM [ppm]	Deltam/z [Da]	a-c	RT [min]	First Scan	Spectrum File	Ions Matched	Ions Score	Identity Strict	Identity Relaxed	Expectation Value	XCorr	Percolator q-Value	Percolator PEP
High	TRUE	Homo sapiens	Q5RF10; Q2I6W4	Sequest HT (A4)	0.448179	0.000248125	a-c	31.4382	4828	A_IyII_1-3.raw	0/0					2.84665	0.002128	0.1495
Serotransferrin OS=Pan troglodytes GN=TF PE=2 SV=1	A5A6I6	Homo sapiens	77.014	18.6246	299.012	8	a-c
Sequence	Confidence	Homo sapiens	Master Protein Accessions	Modifications	Percolator PEP Sequest HT		a-c
WAMLGALGCVFPELLAR	High	Homo sapiens	P15193	1xCarbamidomethyl [C9]	0.2849		a-c
Confidence	Checked	Homo sapiens	Master Protein Accessions	Identifying Node	DeltaM [ppm]	Deltam/z [Da]	a-c	RT [min]	First Scan	Spectrum File	Ions Matched	Ions Score	Identity Strict	Identity Relaxed	Expectation Value	XCorr	Percolator q-Value	Percolator PEP
High	TRUE	Homo sapiens	P15193	Mascot (A2)	1.86239	0.00177299	a-c	80.5336	14711	A_IyII_1-3.raw	7/128	9.98	46	39	47.3475		0.004235	0.1423
ERO1-like protein alpha OS=Homo sapiens GN=ERO1A PE=1 SV=2	Q96HE7	Homo sapiens	54.358	20.5128	125.047	7	a-c
Sequence	Confidence	Homo sapiens	Master Protein Accessions	Modifications	Percolator PEP Sequest HT		a-c
FMETVAEKALQEYR	High	Homo sapiens	P10909		0.004654		a-c
Confidence	Checked	Homo sapiens	Master Protein Accessions	Identifying Node	DeltaM [ppm]	Deltam/z [Da]	a-c	RT [min]	First Scan	Spectrum File	Ions Matched	Ions Score	Identity Strict	Identity Relaxed	Expectation Value	XCorr	Percolator q-Value	Percolator PEP
High	TRUE	Homo sapiens	P10909	Sequest HT (A4)	0.150903	8.62586e-05	a-c	34.4044	5447	A_IyII_1-3.raw	0/0					4.26889	0	0.004654
High	TRUE	Homo sapiens	P10909	Mascot (A2)	0.150903	8.62586e-05	a-c	34.4044	5447	A_IyII_1-3.raw	9/128	34.44	45	38	0.128718		0	0.003429
EPQDTYHYLPFSLPHR	High	Homo sapiens	P10909		0.03494		a-c
Confidence	Checked	Homo sapiens	Master Protein Accessions	Identifying Node	DeltaM [ppm]	Deltam/z [Da]	a-c	RT [min]	First Scan	Spectrum File	Ions Matched	Ions Score	Identity Strict	Identity Relaxed	Expectation Value	XCorr	Percolator q-Value	Percolator PEP
High	TRUE	Homo sapiens	P10909	Sequest HT (A4)	1.70852	0.000854247	a-c	32.9596	5147	A_IyII_1-3.raw	0/0					3.2741	0	0.03494
High	TRUE	Homo sapiens	P10909	Mascot (A2)	1.70852	0.000854247	a-c	32.9596	5147	A_IyII_1-3.raw	5/172	13.49	46	39	18.3809		0.001533	0.03489
VTTVASHTSDSDVPSGVTEVVVK	High	Homo sapiens	P10909		0.1112		a-c
Confidence	Checked	Homo sapiens	Master Protein Accessions	Identifying Node	DeltaM [ppm]	Deltam/z [Da]	a-c	RT [min]	First Scan	Spectrum File	Ions Matched	Ions Score	Identity Strict	Identity Relaxed	Expectation Value	XCorr	Percolator q-Value	Percolator PEP
High	TRUE	Homo sapiens	P10909	Sequest HT (A4)	0.747078	0.00057629	a-c	28.2246	4161	A_IyII_1-3.raw	0/0					3.72978	0.001107	0.1112
Keratin, type I cytoskeletal 13 OS=Homo sapiens GN=KRT13 PE=1 SV=4	P13646	Homo sapiens	49.557	24.4541	121.257	7	a-c
Sequence	Confidence	Homo sapiens	Master Protein Accessions	Modifications	Percolator PEP Sequest HT		a-c
LHEAFSPVSYQHDLALLR	High	Homo sapiens	P00748		0.002761		a-c
Confidence	Checked	Homo sapiens	Master Protein Accessions	Identifying Node	DeltaM [ppm]	Deltam/z [Da]	a-c	RT [min]	First Scan	Spectrum File	Ions Matched	Ions Score	Identity Strict	Identity Relaxed	Expectation Value	XCorr	Percolator q-Value	Percolator PEP
High	TRUE	Homo sapiens	P00748	Sequest HT (A4)	1.20229	0.00063003	a-c	34.896	5550	A_IyII_1-3.raw	0/0					4.023	0	0.002761
High	TRUE	Homo sapiens	P00748	Mascot (A2)	1.20229	0.00063003	a-c	34.896	5550	A_IyII_1-3.raw	15/164	33.06	46	39	0.204422		0	0.000893
Sequence	Confidence	Homo sapiens	Master Protein Accessions	Modifications	Percolator PEP Sequest HT		a-c
SGIPIVTSPYQIHFTK	High	Homo sapiens	P01026; P01024		0.00828		a-c
Confidence	Checked	Homo sapiens	Master Protein Accessions	Identifying Node	DeltaM [ppm]	Deltam/z [Da]	a-c	RT [min]	First Scan	Spectrum File	Ions Matched	Ions Score	Identity Strict	Identity Relaxed	Expectation Value	XCorr	Percolator q-Value	Percolator PEP
High	TRUE	Homo sapiens	P01026; P01024	Sequest HT (A4)	1.11641	0.000665371	a-c	36.3049	5842	A_IyII_1-3.raw	0/0					4.55092	0	0.00828
High	TRUE	Homo sapiens	P01026; P01024	Mascot (A2)	1.11641	0.000665371	a-c	36.3049	5842	A_IyII_1-3.raw	9/140	66.11	46	39	9.75829e-05		0	0.003036
TELRPGETLNVNFLLR	High	Homo sapiens	P01024		0.004975		a-c
Confidence	Checked	Homo sapiens	Master Protein Accessions	Identifying Node	DeltaM [ppm]	Deltam/z [Da]	a-c	RT [min]	First Scan	Spectrum File	Ions Matched	Ions Score	Identity Strict	Identity Relaxed	Expectation Value	XCorr	Percolator q-Value	Percolator PEP
High	TRUE	Homo sapiens	P01024	Sequest HT (A4)	1.01863	0.000635635	a-c	38.9403	6389	A_IyII_1-3.raw	0/0					5.92944	0	0.004975
High	TRUE	Homo sapiens	P01024	Mascot (A2)	1.01863	0.000635635	a-c	38.9403	6389	A_IyII_1-3.raw	19/168	49.48	44	37	0.00302653		0	0.0007019
EYVLPSFEVIVEPTEK	High	Homo sapiens	P01026; P01024		0.001847		a-c
Confidence	Checked	Homo sapiens	Master Protein Accessions	Identifying Node	DeltaM [ppm]	Deltam/z [Da]	a-c	RT [min]	First Scan	Spectrum File	Ions Matched	Ions Score	Identity Strict	Identity Relaxed	Expectation Value	XCorr	Percolator q-Value	Percolator PEP
High	TRUE	Homo sapiens	P01024	Mascot (A2)	1.31841	0.00123863	a-c	47.6369	8165	A_IyII_1-3.raw	9/120	64.25	46	39	0.000161591		0	0.0007106
High	TRUE	Homo sapiens	P01024	Sequest HT (A4)	1.31841	0.00123863	a-c	47.6369	8165	A_IyII_1-3.raw	0/0					5.01745	0	0.001847
High	TRUE	Homo sapiens	P01026	Sequest HT (A4)	1.31841	0.00123863	a-c	47.6369	8165	A_IyII_1-3.raw	0/0					5.01745	0	0.001847
High	TRUE	Homo sapiens	P01026	Mascot (A2)	1.31841	0.00123863	a-c	47.6369	8165	A_IyII_1-3.raw	9/120	64.25	46	39	0.000161591		0	0.0007106
GLEVTITAR	High	Homo sapiens	P01024		0.1352		a-c
Confidence	Checked	Homo sapiens	Master Protein Accessions	Identifying Node	DeltaM [ppm]	Deltam/z [Da]	a-c	RT [min]	First Scan	Spectrum File	Ions Matched	Ions Score	Identity Strict	Identity Relaxed	Expectation Value	XCorr	Percolator q-Value	Percolator PEP
High	TRUE	Homo sapiens	P01024	Sequest HT (A4)	0.729172	0.000349839	a-c	27.322	3977	A_IyII_1-3.raw	0/0					2.8457	0.001107	0.1352
High	TRUE	Homo sapiens	P01024	Mascot (A2)	0.729172	0.000349839	a-c	27.322	3977	A_IyII_1-3.raw	6/64	57.05	44	37	0.000585711		0.001533	0.03305
EPGQDLVVLPLSITTDFIPSFR	High	Homo sapiens	P01024		0.08584		a-c
Confidence	Checked	Homo sapiens	Master Protein Accessions	Identifying Node	DeltaM [ppm]	Deltam/z [Da]	a-c	RT [min]	First Scan	Spectrum File	Ions Matched	Ions Score	Identity Strict	Identity Relaxed	Expectation Value	XCorr	Percolator q-Value	Percolator PEP
High	TRUE	Homo sapiens	P01024	Sequest HT (A4)	1.10306	0.000898742	a-c	84.1548	15396	A_IyII_1-3.raw	0/0					3.36938	0	0.08584
Sequence	Confidence	Homo sapiens	Master Protein Accessions	Modifications	Percolator PEP Sequest HT		a-c
SGIPIVTSPYQIHFTK	High	Homo sapiens	P01026; P01024		0.00828		a-c
Confidence	Checked	Homo sapiens	Master Protein Accessions	Identifying Node	DeltaM [ppm]	Deltam/z [Da]	a-c	RT [min]	First Scan	Spectrum File	Ions Matched	Ions Score	Identity Strict	Identity Relaxed	Expectation Value	XCorr	Percolator q-Value	Percolator PEP
High	TRUE	Homo sapiens	P01026; P01024	Sequest HT (A4)	1.11641	0.000665371	a-c	36.3049	5842	A_IyII_1-3.raw	0/0					4.55092	0	0.00828
High	TRUE	Homo sapiens	P01026; P01024	Mascot (A2)	1.11641	0.000665371	a-c	36.3049	5842	A_IyII_1-3.raw	9/140	66.11	46	39	9.75829e-05		0	0.003036
EYVLPSFEVIVEPTEK	High	Homo sapiens	P01026; P01024		0.001847		a-c
Confidence	Checked	Homo sapiens	Master Protein Accessions	Identifying Node	DeltaM [ppm]	Deltam/z [Da]	a-c	RT [min]	First Scan	Spectrum File	Ions Matched	Ions Score	Identity Strict	Identity Relaxed	Expectation Value	XCorr	Percolator q-Value	Percolator PEP
High	TRUE	Homo sapiens	P01024	Mascot (A2)	1.31841	0.00123863	a-c	47.6369	8165	A_IyII_1-3.raw	9/120	64.25	46	39	0.000161591		0	0.0007106
High	TRUE	Homo sapiens	P01024	Sequest HT (A4)	1.31841	0.00123863	a-c	47.6369	8165	A_IyII_1-3.raw	0/0					5.01745	0	0.001847
High	TRUE	Homo sapiens	P01026	Sequest HT (A4)	1.31841	0.00123863	a-c	47.6369	8165	A_IyII_1-3.raw	0/0					5.01745	0	0.001847
High	TRUE	Homo sapiens	P01026	Mascot (A2)	1.31841	0.00123863	a-c	47.6369	8165	A_IyII_1-3.raw	9/120	64.25	46	39	0.000161591		0	0.0007106
EVVADSVWVDVKDSCVGTLVVK	High	Homo sapiens	P01026	1xCarbamidomethyl [C15]	0.05721		a-c
Confidence	Checked	Homo sapiens	Master Protein Accessions	Identifying Node	DeltaM [ppm]	Deltam/z [Da]	a-c	RT [min]	First Scan	Spectrum File	Ions Matched	Ions Score	Identity Strict	Identity Relaxed	Expectation Value	XCorr	Percolator q-Value	Percolator PEP
High	TRUE	Homo sapiens	P01026	Sequest HT (A4)	-0.967124	-0.000775067	a-c	46.5894	7954	A_IyII_1-3.raw	0/0					2.67411	0	0.05721
High	TRUE	Homo sapiens	P01026	Mascot (A2)	-0.967124	-0.000775067	a-c	46.5894	7954	A_IyII_1-3.raw	7/208	14.21	46	39	18.8159		0.002414	0.06556
Sequence	Confidence	Homo sapiens	Master Protein Accessions	Modifications	Percolator PEP Sequest HT		a-c
LLEQEFADVIVKPHDPATVDEVLR	High	Homo sapiens	Q9UBG3		8.816e-05		a-c
Confidence	Checked	Homo sapiens	Master Protein Accessions	Identifying Node	DeltaM [ppm]	Deltam/z [Da]	a-c	RT [min]	First Scan	Spectrum File	Ions Matched	Ions Score	Identity Strict	Identity Relaxed	Expectation Value	XCorr	Percolator q-Value	Percolator PEP
High	TRUE	Homo sapiens	Q9UBG3	Sequest HT (A4)	1.04562	0.000714539	a-c	40.6578	6745	A_IyII_1-3.raw	0/0					4.27357	0	0.009808
High	TRUE	Homo sapiens	Q9UBG3	Mascot (A2)	1.04562	0.000714539	a-c	40.6578	6745	A_IyII_1-3.raw	25/264	32.36	45	38	0.195195		0	0.009435
High	TRUE	Homo sapiens	Q9UBG3	Sequest HT (A4)	0.291356	0.000265468	a-c	40.6204	6737	A_IyII_1-3.raw	0/0					6.03315	0	8.816e-05
High	TRUE	Homo sapiens	Q9UBG3	Mascot (A2)	0.291356	0.000265468	a-c	40.6204	6737	A_IyII_1-3.raw	22/264	53.41	45	38	0.00159818		0	7.974e-05
Glucose-6-phosphate isomerase OS=Homo sapiens GN=GPI PE=1 SV=4	P06744	Homo sapiens	63.107	22.4014	265.98	6	a-c
Sequence	Confidence	Homo sapiens	Master Protein Accessions	Modifications	Percolator PEP Sequest HT		a-c
SQPNLDNCPFNDQPK	High	Homo sapiens	P28325	1xCarbamidomethyl [C8]	0.1464		a-c
Confidence	Checked	Homo sapiens	Master Protein Accessions	Identifying Node	DeltaM [ppm]	Deltam/z [Da]	a-c	RT [min]	First Scan	Spectrum File	Ions Matched	Ions Score	Identity Strict	Identity Relaxed	Expectation Value	XCorr	Percolator q-Value	Percolator PEP
High	TRUE	Homo sapiens	P28325	Sequest HT (A4)	1.09272	0.000969128	a-c	26.3808	3785	A_IyII_1-3.raw	0/0					2.76329	0.002128	0.1464
High	TRUE	Homo sapiens	P28325	Mascot (A2)	1.09272	0.000969128	a-c	26.3808	3785	A_IyII_1-3.raw	6/164	27.22	41	34	0.263927		0.004235	0.1054
Glucosidase 2 subunit beta OS=Homo sapiens GN=PRKCSH PE=1 SV=2	P14314	Homo sapiens	59.388	17.9924	76.1467	6	a-c
Sequence	Confidence	Homo sapiens	Master Protein Accessions	Modifications	Percolator PEP Sequest HT		a-c
TMNNFLDREQYGQYSLAVR	High	Homo sapiens	Q03763		0.008254		a-c
Confidence	Checked	Homo sapiens	Master Protein Accessions	Identifying Node	DeltaM [ppm]	Deltam/z [Da]	a-c	RT [min]	First Scan	Spectrum File	Ions Matched	Ions Score	Identity Strict	Identity Relaxed	Expectation Value	XCorr	Percolator q-Value	Percolator PEP
High	TRUE	Homo sapiens	Q03763	Sequest HT (A4)	0.560526	0.00043069	a-c	35.3306	5640	A_IyII_1-3.raw	0/0					4.05122	0	0.008254
High	TRUE	Homo sapiens	Q03763	Mascot (A2)	0.560526	0.00043069	a-c	35.3306	5640	A_IyII_1-3.raw	11/208	26.11	45	38	0.971054		0	0.02409
Sequence	Confidence	Homo sapiens	Master Protein Accessions	Modifications	Percolator PEP Sequest HT		a-c
ALNSMGQDLERPLELR	High	Homo sapiens	Q02413		0.03914		a-c
Confidence	Checked	Homo sapiens	Master Protein Accessions	Identifying Node	DeltaM [ppm]	Deltam/z [Da]	a-c	RT [min]	First Scan	Spectrum File	Ions Matched	Ions Score	Identity Strict	Identity Relaxed	Expectation Value	XCorr	Percolator q-Value	Percolator PEP
High	TRUE	Homo sapiens	Q02413	Sequest HT (A4)	0.112242	6.89148e-05	a-c	33.7859	5318	A_IyII_1-3.raw	0/0					2.37494	0	0.03914
Aldehyde dehydrogenase, dimeric NADP-preferring OS=Homo sapiens GN=ALDH3A1 PE=1 SV=3	P30838	Homo sapiens	50.363	17.66	117.789	5	a-c
Sequence	Confidence	Homo sapiens	Master Protein Accessions	Modifications	Percolator PEP Sequest HT		a-c
ALLQAILQTEDMLK	High	Homo sapiens	E9Q557		0.006594		a-c
Confidence	Checked	Homo sapiens	Master Protein Accessions	Identifying Node	DeltaM [ppm]	Deltam/z [Da]	a-c	RT [min]	First Scan	Spectrum File	Ions Matched	Ions Score	Identity Strict	Identity Relaxed	Expectation Value	XCorr	Percolator q-Value	Percolator PEP
High	TRUE	Homo sapiens	E9Q557	Sequest HT (A4)	1.25885	0.000998821	a-c	63.7854	11407	A_IyII_1-3.raw	0/0					3.90852	0	0.006594
High	TRUE	Homo sapiens	E9Q557	Mascot (A2)	1.25885	0.000998821	a-c	63.7854	11407	A_IyII_1-3.raw	9/144	79.36	44	37	3.22951e-06		0	0.001606
GYFNEELSEILSDPSDDTK	High	Homo sapiens	E9Q557		0.1861		a-c
Confidence	Checked	Homo sapiens	Master Protein Accessions	Identifying Node	DeltaM [ppm]	Deltam/z [Da]	a-c	RT [min]	First Scan	Spectrum File	Ions Matched	Ions Score	Identity Strict	Identity Relaxed	Expectation Value	XCorr	Percolator q-Value	Percolator PEP
High	TRUE	Homo sapiens	E9Q557	Sequest HT (A4)	1.85173	0.00199892	a-c	51.8886	9024	A_IyII_1-3.raw	0/0					2.38165	0.003158	0.1861
High	TRUE	Homo sapiens	E9Q557	Mascot (A2)	1.85173	0.00199892	a-c	51.8886	9024	A_IyII_1-3.raw	5/204	7.74	42	35	31.4155		0.004235	0.1149
Sequence	Confidence	Homo sapiens	Master Protein Accessions	Modifications	Percolator PEP Sequest HT		a-c
DLTQLFMFAR	High	Homo sapiens	Q9UHL4		0.02112		a-c
Confidence	Checked	Homo sapiens	Master Protein Accessions	Identifying Node	DeltaM [ppm]	Deltam/z [Da]	a-c	RT [min]	First Scan	Spectrum File	Ions Matched	Ions Score	Identity Strict	Identity Relaxed	Expectation Value	XCorr	Percolator q-Value	Percolator PEP
High	TRUE	Homo sapiens	Q9UHL4	Sequest HT (A4)	0.480435	0.000298263	a-c	67.6833	12193	A_IyII_1-3.raw	0/0					3.58022	0	0.02112
High	TRUE	Homo sapiens	Q9UHL4	Mascot (A2)	0.480435	0.000298263	a-c	67.6833	12193	A_IyII_1-3.raw	12/96	42.86	43	36	0.0118817		0	0.01437
Guanylate-binding protein 6 OS=Homo sapiens GN=GBP6 PE=2 SV=1	Q6ZN66	Homo sapiens	72.381	13.9021	90.55	5	a-c
Sequence	Confidence	Homo sapiens	Master Protein Accessions	Modifications	Percolator PEP Sequest HT		a-c
LEGSDVQLLEYEASAAGLIR	High	Homo sapiens	Q9NY33		0.09309		a-c
Confidence	Checked	Homo sapiens	Master Protein Accessions	Identifying Node	DeltaM [ppm]	Deltam/z [Da]	a-c	RT [min]	First Scan	Spectrum File	Ions Matched	Ions Score	Identity Strict	Identity Relaxed	Expectation Value	XCorr	Percolator q-Value	Percolator PEP
High	TRUE	Homo sapiens	Q9NY33	Sequest HT (A4)	-0.367724	-0.00039238	a-c	62.859	11220	A_IyII_1-3.raw	0/0					3.33502	0	0.09309
High	TRUE	Homo sapiens	Q9NY33	Mascot (A2)	-0.367724	-0.00039238	a-c	62.859	11220	A_IyII_1-3.raw	7/204	34.07	47	40	0.204391		0.004235	0.1253
Sequence	Confidence	Homo sapiens	Master Protein Accessions	Modifications	Percolator PEP Sequest HT		a-c
YTDATSKYESVMKTEPSIAEYTVR	High	Homo sapiens	Q13217		0.004496		a-c
Confidence	Checked	Homo sapiens	Master Protein Accessions	Identifying Node	DeltaM [ppm]	Deltam/z [Da]	a-c	RT [min]	First Scan	Spectrum File	Ions Matched	Ions Score	Identity Strict	Identity Relaxed	Expectation Value	XCorr	Percolator q-Value	Percolator PEP
High	TRUE	Homo sapiens	Q13217	Sequest HT (A4)	1.50023	0.00103866	a-c	32.6119	5073	A_IyII_1-3.raw	0/0					4.86814	0	0.004496
High	TRUE	Homo sapiens	Q13217	Mascot (A2)	1.50023	0.00103866	a-c	32.6119	5073	A_IyII_1-3.raw	19/252	46.91	46	39	0.00967799		0	0.000159
FIDIAAAKEVLSDPEMR	High	Homo sapiens	Q13217		0.007881		a-c
Confidence	Checked	Homo sapiens	Master Protein Accessions	Identifying Node	DeltaM [ppm]	Deltam/z [Da]	a-c	RT [min]	First Scan	Spectrum File	Ions Matched	Ions Score	Identity Strict	Identity Relaxed	Expectation Value	XCorr	Percolator q-Value	Percolator PEP
High	TRUE	Homo sapiens	Q13217	Mascot (A2)	1.88309	0.00119575	a-c	40.2183	6654	A_IyII_1-3.raw	10/164	45.47	47	40	0.014926		0	0.0004842
High	TRUE	Homo sapiens	Q13217	Sequest HT (A4)	1.88309	0.00119575	a-c	40.2183	6654	A_IyII_1-3.raw	0/0					5.03167	0	0.007881
FIDIAAAKEVLSDPEMR	High	Homo sapiens	Q13217	1xOxidation [M16]	0.001062		a-c
Confidence	Checked	Homo sapiens	Master Protein Accessions	Identifying Node	DeltaM [ppm]	Deltam/z [Da]	a-c	RT [min]	First Scan	Spectrum File	Ions Matched	Ions Score	Identity Strict	Identity Relaxed	Expectation Value	XCorr	Percolator q-Value	Percolator PEP
High	TRUE	Homo sapiens	Q13217	Sequest HT (A4)	1.43252	0.000917276	a-c	37.9537	6186	A_IyII_1-3.raw	0/0					4.76303	0	0.001062
High	TRUE	Homo sapiens	Q13217	Mascot (A2)	1.43252	0.000917276	a-c	37.9537	6186	A_IyII_1-3.raw	10/164	37.06	46	39	0.0944487		0	0.00102
KFDDGEDPLDAESQQGGGGNPFHR	High	Homo sapiens	Q13217		0.04438		a-c
Confidence	Checked	Homo sapiens	Master Protein Accessions	Identifying Node	DeltaM [ppm]	Deltam/z [Da]	a-c	RT [min]	First Scan	Spectrum File	Ions Matched	Ions Score	Identity Strict	Identity Relaxed	Expectation Value	XCorr	Percolator q-Value	Percolator PEP
High	TRUE	Homo sapiens	Q13217	Sequest HT (A4)	0.402039	0.000258625	a-c	29.4784	4420	A_IyII_1-3.raw	0/0					2.72277	0	0.04438
High	TRUE	Homo sapiens	Q13217	Mascot (A2)	0.402039	0.000258625	a-c	29.4784	4420	A_IyII_1-3.raw	18/276	26.91	41	34	0.265121		0	0.01549
KFIDIAAAKEVLSDPEMR	High	Homo sapiens	Q13217		0.1212		a-c
Confidence	Checked	Homo sapiens	Master Protein Accessions	Identifying Node	DeltaM [ppm]	Deltam/z [Da]	a-c	RT [min]	First Scan	Spectrum File	Ions Matched	Ions Score	Identity Strict	Identity Relaxed	Expectation Value	XCorr	Percolator q-Value	Percolator PEP
High	TRUE	Homo sapiens	Q13217	Sequest HT (A4)	0.620832	0.000315549	a-c	36.3746	5857	A_IyII_1-3.raw	0/0					2.49331	0.001107	0.1212
High	TRUE	Homo sapiens	Q13217	Mascot (A2)	0.620832	0.000315549	a-c	36.3746	5857	A_IyII_1-3.raw	16/204	24.2	46	39	1.68424		0.001533	0.03185
Sequence	Confidence	Homo sapiens	Master Protein Accessions	Modifications	Percolator PEP Sequest HT		a-c
STLTDSLVAAAGIIAQEVAGDVR	High	Homo sapiens	O23755		0.001493		a-c
Confidence	Checked	Homo sapiens	Master Protein Accessions	Identifying Node	DeltaM [ppm]	Deltam/z [Da]	a-c	RT [min]	First Scan	Spectrum File	Ions Matched	Ions Score	Identity Strict	Identity Relaxed	Expectation Value	XCorr	Percolator q-Value	Percolator PEP
High	TRUE	Homo sapiens	O23755	Sequest HT (A4)	0.859837	0.000646943	a-c	86.2247	15813	A_IyII_1-3.raw	0/0					6.16595	0	0.001493
High	TRUE	Homo sapiens	O23755	Mascot (A2)	0.859837	0.000646943	a-c	86.2247	15813	A_IyII_1-3.raw	22/204	41.47	45	38	0.0259906		0	0.0004832
Sequence	Confidence	Homo sapiens	Master Protein Accessions	Modifications	Percolator PEP Sequest HT		a-c
YSQFINFPIYVWSSK	High	Homo sapiens	P41148		0.07775		a-c
Confidence	Checked	Homo sapiens	Master Protein Accessions	Identifying Node	DeltaM [ppm]	Deltam/z [Da]	a-c	RT [min]	First Scan	Spectrum File	Ions Matched	Ions Score	Identity Strict	Identity Relaxed	Expectation Value	XCorr	Percolator q-Value	Percolator PEP
High	TRUE	Homo sapiens	P41148	Sequest HT (A4)	2.10836	0.00198074	a-c	63.6508	11380	A_IyII_1-3.raw	0/0					3.86736	0	0.07775
High	TRUE	Homo sapiens	P41148	Mascot (A2)	2.10836	0.00198074	a-c	63.6508	11380	A_IyII_1-3.raw	6/160	25.31	46	39	1.39168		0.002414	0.07572
ELISNASDAIDK	High	Homo sapiens	Q04619; P41148		0.1936		a-c
Confidence	Checked	Homo sapiens	Master Protein Accessions	Identifying Node	DeltaM [ppm]	Deltam/z [Da]	a-c	RT [min]	First Scan	Spectrum File	Ions Matched	Ions Score	Identity Strict	Identity Relaxed	Expectation Value	XCorr	Percolator q-Value	Percolator PEP
High	TRUE	Homo sapiens	Q04619; P41148	Sequest HT (A4)	1.38772	0.000885119	a-c	27.9989	4115	A_IyII_1-3.raw	0/0					2.30382	0.003158	0.1936
High	TRUE	Homo sapiens	Q04619; P41148	Mascot (A2)	1.38772	0.000885119	a-c	27.9989	4115	A_IyII_1-3.raw	5/116	24.1	45	38	1.51961		0.007196	0.2041
Sequence	Confidence	Homo sapiens	Master Protein Accessions	Modifications	Percolator PEP Sequest HT		a-c
IWNVIYEENCFKPQTIK	High	Homo sapiens	Q96HE7	1xCarbamidomethyl [C10]	0.0007175		a-c
Confidence	Checked	Homo sapiens	Master Protein Accessions	Identifying Node	DeltaM [ppm]	Deltam/z [Da]	a-c	RT [min]	First Scan	Spectrum File	Ions Matched	Ions Score	Identity Strict	Identity Relaxed	Expectation Value	XCorr	Percolator q-Value	Percolator PEP
High	TRUE	Homo sapiens	Q96HE7	Mascot (A2)	0.724858	0.000527238	a-c	36.7191	5929	A_IyII_1-3.raw	18/184	24.69	46	39	1.6212		0	0.005959
High	TRUE	Homo sapiens	Q96HE7	Sequest HT (A4)	0.724858	0.000527238	a-c	36.7191	5929	A_IyII_1-3.raw	0/0					3.62507	0	0.0007175
LIANMPESGPSYEFHLTR	High	Homo sapiens	Q96HE7		0.001427		a-c
Confidence	Checked	Homo sapiens	Master Protein Accessions	Identifying Node	DeltaM [ppm]	Deltam/z [Da]	a-c	RT [min]	First Scan	Spectrum File	Ions Matched	Ions Score	Identity Strict	Identity Relaxed	Expectation Value	XCorr	Percolator q-Value	Percolator PEP
High	TRUE	Homo sapiens	Q96HE7	Sequest HT (A4)	0.840144	0.000577461	a-c	34.5914	5486	A_IyII_1-3.raw	0/0					3.6791	0	0.001427
High	TRUE	Homo sapiens	Q96HE7	Mascot (A2)	0.840144	0.000577461	a-c	34.5914	5486	A_IyII_1-3.raw	20/192	42.96	46	39	0.0231921		0	0.001638
QEIVSLFNAFGR	High	Homo sapiens	Q96HE7		0.0164		a-c
Confidence	Checked	Homo sapiens	Master Protein Accessions	Identifying Node	DeltaM [ppm]	Deltam/z [Da]	a-c	RT [min]	First Scan	Spectrum File	Ions Matched	Ions Score	Identity Strict	Identity Relaxed	Expectation Value	XCorr	Percolator q-Value	Percolator PEP
High	TRUE	Homo sapiens	Q96HE7	Mascot (A2)	0.760174	0.000524796	a-c	45.1307	7657	A_IyII_1-3.raw	10/132	87.69	45	38	5.56776e-07		0	0.0009684
High	TRUE	Homo sapiens	Q96HE7	Sequest HT (A4)	0.760174	0.000524796	a-c	45.1307	7657	A_IyII_1-3.raw	0/0					3.59546	0	0.0164
SFPLHFDENSFFAGDK	High	Homo sapiens	Q96HE7		0.01739		a-c
Confidence	Checked	Homo sapiens	Master Protein Accessions	Identifying Node	DeltaM [ppm]	Deltam/z [Da]	a-c	RT [min]	First Scan	Spectrum File	Ions Matched	Ions Score	Identity Strict	Identity Relaxed	Expectation Value	XCorr	Percolator q-Value	Percolator PEP
High	TRUE	Homo sapiens	Q96HE7	Mascot (A2)	0.904631	0.000560221	a-c	40.9142	6798	A_IyII_1-3.raw	8/148	18.07	43	36	3.11599		0	0.02094
High	TRUE	Homo sapiens	Q96HE7	Sequest HT (A4)	0.904631	0.000560221	a-c	40.9142	6798	A_IyII_1-3.raw	0/0					2.79465	0	0.01739
LGAVDESLSEETQK	High	Homo sapiens	Q96HE7		0.01505		a-c
Confidence	Checked	Homo sapiens	Master Protein Accessions	Identifying Node	DeltaM [ppm]	Deltam/z [Da]	a-c	RT [min]	First Scan	Spectrum File	Ions Matched	Ions Score	Identity Strict	Identity Relaxed	Expectation Value	XCorr	Percolator q-Value	Percolator PEP
High	TRUE	Homo sapiens	Q96HE7	Sequest HT (A4)	1.05378	0.000793355	a-c	25.86	3680	A_IyII_1-3.raw	0/0					3.03949	0	0.01505
High	TRUE	Homo sapiens	Q96HE7	Mascot (A2)	1.05378	0.000793355	a-c	25.86	3680	A_IyII_1-3.raw	8/108	57.73	45	38	0.000635746		0	0.008546
MLLLEILHEIK	High	Homo sapiens	Q96HE7		0.1385		a-c
Confidence	Checked	Homo sapiens	Master Protein Accessions	Identifying Node	DeltaM [ppm]	Deltam/z [Da]	a-c	RT [min]	First Scan	Spectrum File	Ions Matched	Ions Score	Identity Strict	Identity Relaxed	Expectation Value	XCorr	Percolator q-Value	Percolator PEP
High	TRUE	Homo sapiens	Q96HE7	Sequest HT (A4)	0.986817	0.00044466	a-c	53.0588	9260	A_IyII_1-3.raw	0/0					1.73844	0	0.06755
High	TRUE	Homo sapiens	Q96HE7	Sequest HT (A4)	0.11632	7.86208e-05	a-c	53.0145	9251	A_IyII_1-3.raw	0/0					2.11103	0.001107	0.1385
High	TRUE	Homo sapiens	Q96HE7	Sequest HT (A4)	0.512732	0.000231037	a-c	52.9947	9247	A_IyII_1-3.raw	0/0					2.06286	0.001107	0.1409
High	TRUE	Homo sapiens	Q96HE7	Mascot (A2)	0.11632	7.86208e-05	a-c	53.0145	9251	A_IyII_1-3.raw	5/80	22.68	37	30	0.332069		0.004235	0.1691
MLLLEILHEIK	High	Homo sapiens	Q96HE7	1xOxidation [M1]	0.1285		a-c
Confidence	Checked	Homo sapiens	Master Protein Accessions	Identifying Node	DeltaM [ppm]	Deltam/z [Da]	a-c	RT [min]	First Scan	Spectrum File	Ions Matched	Ions Score	Identity Strict	Identity Relaxed	Expectation Value	XCorr	Percolator q-Value	Percolator PEP
High	TRUE	Homo sapiens	Q96HE7	Sequest HT (A4)	0.498375	0.000227225	a-c	42.7875	7180	A_IyII_1-3.raw	0/0					2.40295	0.001107	0.1285
High	TRUE	Homo sapiens	Q96HE7	Mascot (A2)	0.498375	0.000227225	a-c	42.7875	7180	A_IyII_1-3.raw	8/80	13.58	40	33	4.48617		0.002414	0.03991
SFPLHFDENSFFAGDKK	High	Homo sapiens	Q96HE7		0.1102		a-c
Confidence	Checked	Homo sapiens	Master Protein Accessions	Identifying Node	DeltaM [ppm]	Deltam/z [Da]	a-c	RT [min]	First Scan	Spectrum File	Ions Matched	Ions Score	Identity Strict	Identity Relaxed	Expectation Value	XCorr	Percolator q-Value	Percolator PEP
High	TRUE	Homo sapiens	Q96HE7	Sequest HT (A4)	1.05854	0.000525551	a-c	36.7033	5926	A_IyII_1-3.raw	0/0					2.00363	0.001107	0.1102
AVLQWTK	High	Homo sapiens	Q96HE7		0.3378		a-c
Confidence	Checked	Homo sapiens	Master Protein Accessions	Identifying Node	DeltaM [ppm]	Deltam/z [Da]	a-c	RT [min]	First Scan	Spectrum File	Ions Matched	Ions Score	Identity Strict	Identity Relaxed	Expectation Value	XCorr	Percolator q-Value	Percolator PEP
High	TRUE	Homo sapiens	Q96HE7	Mascot (A2)	1.36932	0.000578873	a-c	26.4158	3792	A_IyII_1-3.raw	5/60	23.84	46	39	1.67532		0.004235	0.1142
Prosaposin OS=Homo sapiens GN=PSAP PE=1 SV=2	P07602	Homo sapiens	58.074	12.7863	135.11	5	a-c
Sequence	Confidence	Homo sapiens	Master Protein Accessions	Modifications	Percolator PEP Sequest HT		a-c
MIIPSLDGDLFQWDR	High	Homo sapiens	Q9Z2B5		0.4919		a-c
Confidence	Checked	Homo sapiens	Master Protein Accessions	Identifying Node	DeltaM [ppm]	Deltam/z [Da]	a-c	RT [min]	First Scan	Spectrum File	Ions Matched	Ions Score	Identity Strict	Identity Relaxed	Expectation Value	XCorr	Percolator q-Value	Percolator PEP
High	TRUE	Homo sapiens	Q9Z2B5	Mascot (A2)	-0.47083	-0.000425134	a-c	68.6048	12380	A_IyII_1-3.raw	6/124	31.23	46	39	0.331702		0.004235	0.1179
Protein disulfide-isomerase OS=Homo sapiens GN=P4HB PE=1 SV=3	P07237	Homo sapiens	57.081	17.9134	54.1567	5	a-c
Sequence	Confidence	Homo sapiens	Master Protein Accessions	Modifications	Percolator PEP Sequest HT		a-c
QAVDQIKSQEQLAAELAEYTAK	High	Homo sapiens	P15311		0.002712		a-c
Confidence	Checked	Homo sapiens	Master Protein Accessions	Identifying Node	DeltaM [ppm]	Deltam/z [Da]	a-c	RT [min]	First Scan	Spectrum File	Ions Matched	Ions Score	Identity Strict	Identity Relaxed	Expectation Value	XCorr	Percolator q-Value	Percolator PEP
High	TRUE	Homo sapiens	P15311	Sequest HT (A4)	1.12717	0.000914605	a-c	39.2034	6444	A_IyII_1-3.raw	0/0					5.98567	0	0.002712
High	TRUE	Homo sapiens	P15311	Mascot (A2)	1.12717	0.000914605	a-c	39.2034	6444	A_IyII_1-3.raw	10/252	40.19	47	40	0.0517172		0	0.01061
IGFPWSEIR	High	Homo sapiens	O35763; P15311		0.1447		a-c
Confidence	Checked	Homo sapiens	Master Protein Accessions	Identifying Node	DeltaM [ppm]	Deltam/z [Da]	a-c	RT [min]	First Scan	Spectrum File	Ions Matched	Ions Score	Identity Strict	Identity Relaxed	Expectation Value	XCorr	Percolator q-Value	Percolator PEP
High	TRUE	Homo sapiens	O35763; P15311	Mascot (A2)	1.00368	0.000554323	a-c	40.5219	6717	A_IyII_1-3.raw	8/64	59.39	45	38	0.000427695		0	0.01477
High	TRUE	Homo sapiens	O35763; P15311	Sequest HT (A4)	1.00368	0.000554323	a-c	40.5219	6717	A_IyII_1-3.raw	0/0					2.85829	0.001107	0.1447
AKFYPEDVAEELIQDITQK	High	Homo sapiens	P15311		0.05224		a-c
Confidence	Checked	Homo sapiens	Master Protein Accessions	Identifying Node	DeltaM [ppm]	Deltam/z [Da]	a-c	RT [min]	First Scan	Spectrum File	Ions Matched	Ions Score	Identity Strict	Identity Relaxed	Expectation Value	XCorr	Percolator q-Value	Percolator PEP
High	TRUE	Homo sapiens	P15311	Sequest HT (A4)	0.370481	0.000276272	a-c	69.1723	12495	A_IyII_1-3.raw	0/0					3.35598	0	0.05224
High	TRUE	Homo sapiens	P15311	Mascot (A2)	0.370481	0.000276272	a-c	69.1723	12495	A_IyII_1-3.raw	8/212	15.28	46	39	14.286		0.004235	0.1076
KAPDFVFYAPR	High	Homo sapiens	O35763; P15311		0.1276		a-c
Confidence	Checked	Homo sapiens	Master Protein Accessions	Identifying Node	DeltaM [ppm]	Deltam/z [Da]	a-c	RT [min]	First Scan	Spectrum File	Ions Matched	Ions Score	Identity Strict	Identity Relaxed	Expectation Value	XCorr	Percolator q-Value	Percolator PEP
High	TRUE	Homo sapiens	O35763; P15311	Sequest HT (A4)	-0.233804	-0.000102148	a-c	31.2932	4797	A_IyII_1-3.raw	0/0					1.75137	0.001107	0.1276
Aminopeptidase N OS=Homo sapiens GN=ANPEP PE=1 SV=4	P15144	Homo sapiens	109.471	5.27404	105.1	4	a-c
Sequence	Confidence	Homo sapiens	Master Protein Accessions	Modifications	Percolator PEP Sequest HT		a-c
TPCTVSCNIPVVSGKECEEIIR	High	Homo sapiens	P02675	3xCarbamidomethyl [C3; C7; C17]	0.01531		a-c
Confidence	Checked	Homo sapiens	Master Protein Accessions	Identifying Node	DeltaM [ppm]	Deltam/z [Da]	a-c	RT [min]	First Scan	Spectrum File	Ions Matched	Ions Score	Identity Strict	Identity Relaxed	Expectation Value	XCorr	Percolator q-Value	Percolator PEP
High	TRUE	Homo sapiens	P02675	Sequest HT (A4)	1.28001	0.00108725	a-c	31.6069	4863	A_IyII_1-3.raw	0/0					2.50228	0	0.01531
High	TRUE	Homo sapiens	P02675	Mascot (A2)	1.28001	0.00108725	a-c	31.6069	4863	A_IyII_1-3.raw	7/224	26.01	46	39	1.16509		0	0.01482
Sequence	Confidence	Homo sapiens	Master Protein Accessions	Modifications	Percolator PEP Sequest HT		a-c
EGFGHLSPTGTTEFWLGNEK	High	Homo sapiens	P02679		0.008114		a-c
Confidence	Checked	Homo sapiens	Master Protein Accessions	Identifying Node	DeltaM [ppm]	Deltam/z [Da]	a-c	RT [min]	First Scan	Spectrum File	Ions Matched	Ions Score	Identity Strict	Identity Relaxed	Expectation Value	XCorr	Percolator q-Value	Percolator PEP
High	TRUE	Homo sapiens	P02679	Sequest HT (A4)	0.887336	0.000652795	a-c	38.3339	6264	A_IyII_1-3.raw	0/0					5.05471	0	0.008114
High	TRUE	Homo sapiens	P02679	Mascot (A2)	0.887336	0.000652795	a-c	38.3339	6264	A_IyII_1-3.raw	17/160	27.43	45	38	0.625734		0	0.009626
Complement C3 OS=Homo sapiens GN=C3 PE=1 SV=2	P01024	Homo sapiens	187.03	4.75045	150.64	4	a-c
Sequence	Confidence	Homo sapiens	Master Protein Accessions	Modifications	Percolator PEP Sequest HT		a-c
SLGLNPNHIHIYSASWGPEDDGK	High	Homo sapiens	P09958	1xDeamidated [N]	0.002402		a-c
Confidence	Checked	Homo sapiens	Master Protein Accessions	Identifying Node	DeltaM [ppm]	Deltam/z [Da]	a-c	RT [min]	First Scan	Spectrum File	Ions Matched	Ions Score	Identity Strict	Identity Relaxed	Expectation Value	XCorr	Percolator q-Value	Percolator PEP
High	TRUE	Homo sapiens	P09958	Sequest HT (A4)	0.236827	0.000148501	a-c	35.2778	5629	A_IyII_1-3.raw	0/0					4.40339	0	0.002574
High	TRUE	Homo sapiens	P09958	Sequest HT (A4)	0.236827	0.000148501	a-c	35.2778	5629	A_IyII_1-3.raw	0/0					4.54541	0	0.002402
High	TRUE	Homo sapiens	P09958	Mascot (A2)	0.236827	0.000148501	a-c	35.2778	5629	A_IyII_1-3.raw	18/248	42.39	45	38	0.0215019		0	0.001276
High	TRUE	Homo sapiens	P09958	Sequest HT (A4)	1.19123	0.000995941	a-c	35.4127	5657	A_IyII_1-3.raw	0/0					2.27642	0.002128	0.157
SLGLNPNHIHIYSASWGPEDDGK	High	Homo sapiens	P09958		0.004778		a-c
Confidence	Checked	Homo sapiens	Master Protein Accessions	Identifying Node	DeltaM [ppm]	Deltam/z [Da]	a-c	RT [min]	First Scan	Spectrum File	Ions Matched	Ions Score	Identity Strict	Identity Relaxed	Expectation Value	XCorr	Percolator q-Value	Percolator PEP
High	TRUE	Homo sapiens	P09958	Sequest HT (A4)	1.457	0.000913244	a-c	33.1309	5182	A_IyII_1-3.raw	0/0					6.17507	0	0.01321
High	TRUE	Homo sapiens	P09958	Mascot (A2)	1.34064	0.00112042	a-c	33.1126	5178	A_IyII_1-3.raw	10/248	58.28	46	39	0.000613617		0	0.001603
High	TRUE	Homo sapiens	P09958	Sequest HT (A4)	1.34064	0.00112042	a-c	33.1126	5178	A_IyII_1-3.raw	0/0					7.37488	0	0.004778
High	TRUE	Homo sapiens	P09958	Mascot (A2)	1.457	0.000913244	a-c	33.1309	5182	A_IyII_1-3.raw	23/248	54.45	46	39	0.00153924		0	0.004614
GGLGSIFVWASGNGGR	High	Homo sapiens	P09958		0.003866		a-c
Confidence	Checked	Homo sapiens	Master Protein Accessions	Identifying Node	DeltaM [ppm]	Deltam/z [Da]	a-c	RT [min]	First Scan	Spectrum File	Ions Matched	Ions Score	Identity Strict	Identity Relaxed	Expectation Value	XCorr	Percolator q-Value	Percolator PEP
High	TRUE	Homo sapiens	P09958	Sequest HT (A4)	0.522772	0.000401169	a-c	45.2087	7673	A_IyII_1-3.raw	0/0					5.11365	0	0.003866
High	TRUE	Homo sapiens	P09958	Mascot (A2)	0.522772	0.000401169	a-c	45.2087	7673	A_IyII_1-3.raw	11/132	80.64	46	39	3.80358e-06		0	0.0003049
High	TRUE	Homo sapiens	P09958	Sequest HT (A4)	0.593547	0.000303654	a-c	45.1645	7664	A_IyII_1-3.raw	0/0					3.06077	0.001107	0.1161
High	TRUE	Homo sapiens	P09958	Mascot (A2)	0.593547	0.000303654	a-c	45.1645	7664	A_IyII_1-3.raw	8/132	32.05	46	39	0.274911		0.003589	0.0997
GGLGSIFVWASGNGGR	High	Homo sapiens	P09958	1xDeamidated [N13]	0.0009968		a-c
Confidence	Checked	Homo sapiens	Master Protein Accessions	Identifying Node	DeltaM [ppm]	Deltam/z [Da]	a-c	RT [min]	First Scan	Spectrum File	Ions Matched	Ions Score	Identity Strict	Identity Relaxed	Expectation Value	XCorr	Percolator q-Value	Percolator PEP
High	TRUE	Homo sapiens	P09958	Mascot (A2)	-0.356597	-0.000273823	a-c	47.4893	8135	A_IyII_1-3.raw	9/132	68.61	46	39	6.18918e-05		0	0.001052
High	TRUE	Homo sapiens	P09958	Sequest HT (A4)	-0.356597	-0.000273823	a-c	47.4893	8135	A_IyII_1-3.raw	0/0					4.29835	0	0.004112
High	TRUE	Homo sapiens	P09958	Mascot (A2)	1.31259	0.00100791	a-c	50.7166	8787	A_IyII_1-3.raw	9/132	66.47	46	39	9.77664e-05		0	0.01345
High	TRUE	Homo sapiens	P09958	Sequest HT (A4)	0.915168	0.000702739	a-c	52.2727	9102	A_IyII_1-3.raw	0/0					5.18975	0	0.0009968
High	TRUE	Homo sapiens	P09958	Mascot (A2)	0.915168	0.000702739	a-c	52.2727	9102	A_IyII_1-3.raw	11/132	80.98	46	39	3.29851e-06		0	2.127e-05
High	TRUE	Homo sapiens	P09958	Sequest HT (A4)	1.31259	0.00100791	a-c	50.7166	8787	A_IyII_1-3.raw	0/0					3.33698	0	0.03841
LTLSYNRRGDLAIHLVSPMGTR	High	Homo sapiens	P09958		0.02912		a-c
Confidence	Checked	Homo sapiens	Master Protein Accessions	Identifying Node	DeltaM [ppm]	Deltam/z [Da]	a-c	RT [min]	First Scan	Spectrum File	Ions Matched	Ions Score	Identity Strict	Identity Relaxed	Expectation Value	XCorr	Percolator q-Value	Percolator PEP
High	TRUE	Homo sapiens	P09958	Sequest HT (A4)	0.648931	0.000400769	a-c	32.4024	5029	A_IyII_1-3.raw	0/0					2.72982	0	0.02912
High	TRUE	Homo sapiens	P09958	Mascot (A2)	0.648931	0.000400769	a-c	32.4024	5029	A_IyII_1-3.raw	20/232	13.45	44	37	13.8494		0	0.02569
CIIDILTEPK	High	Homo sapiens	P09958	1xCarbamidomethyl [C1]	0.08953		a-c
Confidence	Checked	Homo sapiens	Master Protein Accessions	Identifying Node	DeltaM [ppm]	Deltam/z [Da]	a-c	RT [min]	First Scan	Spectrum File	Ions Matched	Ions Score	Identity Strict	Identity Relaxed	Expectation Value	XCorr	Percolator q-Value	Percolator PEP
High	TRUE	Homo sapiens	P09958	Sequest HT (A4)	0.930242	0.000558912	a-c	39.2472	6453	A_IyII_1-3.raw	0/0					3.30888	0	0.08953
High	TRUE	Homo sapiens	P09958	Mascot (A2)	0.930242	0.000558912	a-c	39.2472	6453	A_IyII_1-3.raw	15/72	56.16	46	39	0.00112953		0	0.01064
DVYQEPTDPKFPQQWYLSGVTQR	High	Homo sapiens	P09958		0.0002805		a-c
Confidence	Checked	Homo sapiens	Master Protein Accessions	Identifying Node	DeltaM [ppm]	Deltam/z [Da]	a-c	RT [min]	First Scan	Spectrum File	Ions Matched	Ions Score	Identity Strict	Identity Relaxed	Expectation Value	XCorr	Percolator q-Value	Percolator PEP
High	TRUE	Homo sapiens	P09958	Mascot (A2)	0.578087	0.000536147	a-c	40.1424	6638	A_IyII_1-3.raw	16/252	48.06	46	39	0.00764614		0	0.0005222
High	TRUE	Homo sapiens	P09958	Sequest HT (A4)	0.578087	0.000536147	a-c	40.1424	6638	A_IyII_1-3.raw	0/0					6.76645	0	0.0002805
CIIDILTEPKDIGK	High	Homo sapiens	P09958	1xCarbamidomethyl [C1]	0.005469		a-c
Confidence	Checked	Homo sapiens	Master Protein Accessions	Identifying Node	DeltaM [ppm]	Deltam/z [Da]	a-c	RT [min]	First Scan	Spectrum File	Ions Matched	Ions Score	Identity Strict	Identity Relaxed	Expectation Value	XCorr	Percolator q-Value	Percolator PEP
High	TRUE	Homo sapiens	P09958	Sequest HT (A4)	0.976001	0.000525374	a-c	37.6696	6127	A_IyII_1-3.raw	0/0					4.70095	0	0.005469
High	TRUE	Homo sapiens	P09958	Mascot (A2)	0.976001	0.000525374	a-c	37.6696	6127	A_IyII_1-3.raw	10/120	42.46	45	38	0.0224152		0	0.004192
FPQQWYLSGVTQR	High	Homo sapiens	P09958		0.02951		a-c
Confidence	Checked	Homo sapiens	Master Protein Accessions	Identifying Node	DeltaM [ppm]	Deltam/z [Da]	a-c	RT [min]	First Scan	Spectrum File	Ions Matched	Ions Score	Identity Strict	Identity Relaxed	Expectation Value	XCorr	Percolator q-Value	Percolator PEP
High	TRUE	Homo sapiens	P09958	Sequest HT (A4)	1.14741	0.000615705	a-c	37.5274	6098	A_IyII_1-3.raw	0/0					3.36694	0	0.02951
High	TRUE	Homo sapiens	P09958	Mascot (A2)	1.14741	0.000615705	a-c	37.5274	6098	A_IyII_1-3.raw	5/136	28.29	46	39	0.622806		0	0.005199
MLDGEVTDAVEAR	High	Homo sapiens	P09958	1xOxidation [M1]	0.002331		a-c
Confidence	Checked	Homo sapiens	Master Protein Accessions	Identifying Node	DeltaM [ppm]	Deltam/z [Da]	a-c	RT [min]	First Scan	Spectrum File	Ions Matched	Ions Score	Identity Strict	Identity Relaxed	Expectation Value	XCorr	Percolator q-Value	Percolator PEP
High	TRUE	Homo sapiens	P09958	Sequest HT (A4)	1.25657	0.000893203	a-c	27.4593	4005	A_IyII_1-3.raw	0/0					4.62912	0	0.002331
High	TRUE	Homo sapiens	P09958	Mascot (A2)	1.25657	0.000893203	a-c	27.4593	4005	A_IyII_1-3.raw	20/96	80.71	43	36	1.89452e-06		0	0.000159
DMQHLVVQTSKPAHLNANDWATNGVGR	High	Homo sapiens	P09958	1xOxidation [M2]	0.000175		a-c
Confidence	Checked	Homo sapiens	Master Protein Accessions	Identifying Node	DeltaM [ppm]	Deltam/z [Da]	a-c	RT [min]	First Scan	Spectrum File	Ions Matched	Ions Score	Identity Strict	Identity Relaxed	Expectation Value	XCorr	Percolator q-Value	Percolator PEP
High	TRUE	Homo sapiens	P09958	Sequest HT (A4)	1.62501	0.00161172	a-c	27.2824	3969	A_IyII_1-3.raw	0/0					3.64732	0	0.01177
High	TRUE	Homo sapiens	P09958	Sequest HT (A4)	0.96408	0.000717144	a-c	27.2725	3967	A_IyII_1-3.raw	0/0					6.64379	0	0.000175
High	TRUE	Homo sapiens	P09958	Mascot (A2)	0.96408	0.000717144	a-c	27.2725	3967	A_IyII_1-3.raw	22/304	49.69	47	40	0.00550957		0	0.0003045
DMQHLVVQTSKPAHLNANDWATNGVGR	High	Homo sapiens	P09958		9.844e-05		a-c
Confidence	Checked	Homo sapiens	Master Protein Accessions	Identifying Node	DeltaM [ppm]	Deltam/z [Da]	a-c	RT [min]	First Scan	Spectrum File	Ions Matched	Ions Score	Identity Strict	Identity Relaxed	Expectation Value	XCorr	Percolator q-Value	Percolator PEP
High	TRUE	Homo sapiens	P09958	Sequest HT (A4)	1.04988	0.00103569	a-c	30.4258	4615	A_IyII_1-3.raw	0/0					7.37401	0	0.0001113
High	TRUE	Homo sapiens	P09958	Mascot (A2)	1.04988	0.00103569	a-c	30.4258	4615	A_IyII_1-3.raw	21/304	55.68	47	40	0.00138497		0	0.0001022
High	TRUE	Homo sapiens	P09958	Mascot (A2)	1.23095	0.000910738	a-c	30.4208	4614	A_IyII_1-3.raw	27/304	69.71	47	40	5.40407e-05		0	2.668e-05
High	TRUE	Homo sapiens	P09958	Sequest HT (A4)	1.23095	0.000910738	a-c	30.4208	4614	A_IyII_1-3.raw	0/0					7.49253	0	9.844e-05
High	TRUE	Homo sapiens	P09958	Mascot (A2)	1.10267	0.000652659	a-c	30.4448	4619	A_IyII_1-3.raw	16/304	21.08	47	40	3.96388		0.006202	0.185
TVTACLGEPNHITR	High	Homo sapiens	P09958	1xCarbamidomethyl [C5]	0.02584		a-c
Confidence	Checked	Homo sapiens	Master Protein Accessions	Identifying Node	DeltaM [ppm]	Deltam/z [Da]	a-c	RT [min]	First Scan	Spectrum File	Ions Matched	Ions Score	Identity Strict	Identity Relaxed	Expectation Value	XCorr	Percolator q-Value	Percolator PEP
High	TRUE	Homo sapiens	P09958	Mascot (A2)	0.705782	0.00055361	a-c	22.4143	2983	A_IyII_1-3.raw	10/120	64.72	45	38	0.000122705		0	0.003921
High	TRUE	Homo sapiens	P09958	Sequest HT (A4)	0.619399	0.000323901	a-c	22.4041	2981	A_IyII_1-3.raw	0/0					3.32138	0	0.004024
High	TRUE	Homo sapiens	P09958	Mascot (A2)	0.619399	0.000323901	a-c	22.4041	2981	A_IyII_1-3.raw	15/120	32.68	45	38	0.208494		0	0.01622
High	TRUE	Homo sapiens	P09958	Sequest HT (A4)	0.705782	0.00055361	a-c	22.4143	2983	A_IyII_1-3.raw	0/0					3.62678	0	0.02584
RGDLAIHLVSPMGTR	High	Homo sapiens	P09958		0.01461		a-c
Confidence	Checked	Homo sapiens	Master Protein Accessions	Identifying Node	DeltaM [ppm]	Deltam/z [Da]	a-c	RT [min]	First Scan	Spectrum File	Ions Matched	Ions Score	Identity Strict	Identity Relaxed	Expectation Value	XCorr	Percolator q-Value	Percolator PEP
High	TRUE	Homo sapiens	P09958	Sequest HT (A4)	0.46203	0.000187455	a-c	28.7857	4278	A_IyII_1-3.raw	0/0					2.45563	0	0.09534
High	TRUE	Homo sapiens	P09958	Sequest HT (A4)	0.319879	0.000173042	a-c	28.7399	4268	A_IyII_1-3.raw	0/0					3.6201	0	0.01461
High	TRUE	Homo sapiens	P09958	Mascot (A2)	0.319879	0.000173042	a-c	28.7399	4268	A_IyII_1-3.raw	7/168	30.19	44	37	0.257581		0	0.003959
High	TRUE	Homo sapiens	P09958	Mascot (A2)	0.46203	0.000187455	a-c	28.7857	4278	A_IyII_1-3.raw	12/168	23.35	44	37	1.24427		0.001533	0.03325
NHPDLAGNYDPGASFDVNDQDPDPQPR	High	Homo sapiens	P09958		5.767e-05		a-c
Confidence	Checked	Homo sapiens	Master Protein Accessions	Identifying Node	DeltaM [ppm]	Deltam/z [Da]	a-c	RT [min]	First Scan	Spectrum File	Ions Matched	Ions Score	Identity Strict	Identity Relaxed	Expectation Value	XCorr	Percolator q-Value	Percolator PEP
High	TRUE	Homo sapiens	P09958	Sequest HT (A4)	1.96242	0.00144791	a-c	31.9837	4942	A_IyII_1-3.raw	0/0					3.69719	0	0.001142
High	TRUE	Homo sapiens	P09958	Mascot (A2)	1.96242	0.00144791	a-c	31.9837	4942	A_IyII_1-3.raw	15/312	23.79	40	33	0.474655		0	0.0007871
High	TRUE	Homo sapiens	P09958	Sequest HT (A4)	1.44995	0.0014264	a-c	31.9226	4929	A_IyII_1-3.raw	0/0					7.52354	0	5.767e-05
High	TRUE	Homo sapiens	P09958	Mascot (A2)	1.44995	0.0014264	a-c	31.9226	4929	A_IyII_1-3.raw	20/312	52.65	40	33	0.000608984		0	0.0004124
SLGLNPNHIHIYSASWGPEDDGKTVDGPAR	High	Homo sapiens	P09958	1xDeamidated [N7]	0.001948		a-c
Confidence	Checked	Homo sapiens	Master Protein Accessions	Identifying Node	DeltaM [ppm]	Deltam/z [Da]	a-c	RT [min]	First Scan	Spectrum File	Ions Matched	Ions Score	Identity Strict	Identity Relaxed	Expectation Value	XCorr	Percolator q-Value	Percolator PEP
High	TRUE	Homo sapiens	P09958	Sequest HT (A4)	1.39851	0.00112039	a-c	33.7143	5303	A_IyII_1-3.raw	0/0					5.69292	0	0.001948
High	TRUE	Homo sapiens	P09958	Mascot (A2)	1.39851	0.00112039	a-c	33.7143	5303	A_IyII_1-3.raw	19/332	37.77	46	39	0.0766529		0	0.003713
SLGLNPNHIHIYSASWGPEDDGKTVDGPAR	High	Homo sapiens	P09958		0.0001717		a-c
Confidence	Checked	Homo sapiens	Master Protein Accessions	Identifying Node	DeltaM [ppm]	Deltam/z [Da]	a-c	RT [min]	First Scan	Spectrum File	Ions Matched	Ions Score	Identity Strict	Identity Relaxed	Expectation Value	XCorr	Percolator q-Value	Percolator PEP
High	TRUE	Homo sapiens	P09958	Sequest HT (A4)	1.16836	0.000748582	a-c	31.8707	4918	A_IyII_1-3.raw	0/0					7.56566	0	0.001202
High	TRUE	Homo sapiens	P09958	Mascot (A2)	1.16836	0.000748582	a-c	31.8707	4918	A_IyII_1-3.raw	36/332	64.29	46	39	0.000179027		0	0.0002851
High	TRUE	Homo sapiens	P09958	Mascot (A2)	0.982036	0.000786501	a-c	31.8752	4919	A_IyII_1-3.raw	30/332	69.48	46	39	5.42182e-05		0	8.131e-05
High	TRUE	Homo sapiens	P09958	Sequest HT (A4)	0.982036	0.000786501	a-c	31.8752	4919	A_IyII_1-3.raw	0/0					7.59282	0	0.0001073
High	TRUE	Homo sapiens	P09958	Sequest HT (A4)	1.88169	0.00200937	a-c	31.9177	4928	A_IyII_1-3.raw	0/0					8.93601	0	0.0001717
High	TRUE	Homo sapiens	P09958	Mascot (A2)	1.88169	0.00200937	a-c	31.9177	4928	A_IyII_1-3.raw	28/332	68.76	46	39	6.39882e-05		0	0.0005385
CAGEVAAVANNGVCGVGVAYNAR	High	Homo sapiens	P09958	2xCarbamidomethyl [C1; C14]	1.195e-05		a-c
Confidence	Checked	Homo sapiens	Master Protein Accessions	Identifying Node	DeltaM [ppm]	Deltam/z [Da]	a-c	RT [min]	First Scan	Spectrum File	Ions Matched	Ions Score	Identity Strict	Identity Relaxed	Expectation Value	XCorr	Percolator q-Value	Percolator PEP
High	TRUE	Homo sapiens	P09958	Sequest HT (A4)	1.29711	0.000985403	a-c	31.7463	4892	A_IyII_1-3.raw	0/0					6.92167	0	1.195e-05
High	TRUE	Homo sapiens	P09958	Mascot (A2)	1.29711	0.000985403	a-c	31.7463	4892	A_IyII_1-3.raw	20/228	56.52	45	38	0.000724241		0	0.0001098
High	TRUE	Homo sapiens	P09958	Mascot (A2)	0.862721	0.00049155	a-c	31.8368	4911	A_IyII_1-3.raw	11/228	15.79	45	38	8.45999		0.004235	0.1127
LAEEAFFR	High	Homo sapiens	P09958		0.09434		a-c
Confidence	Checked	Homo sapiens	Master Protein Accessions	Identifying Node	DeltaM [ppm]	Deltam/z [Da]	a-c	RT [min]	First Scan	Spectrum File	Ions Matched	Ions Score	Identity Strict	Identity Relaxed	Expectation Value	XCorr	Percolator q-Value	Percolator PEP
High	TRUE	Homo sapiens	P09958	Mascot (A2)	0.804223	0.000395074	a-c	31.5456	4850	A_IyII_1-3.raw	7/56	49.41	43	36	0.00278245		0	0.01714
High	TRUE	Homo sapiens	P09958	Sequest HT (A4)	0.804223	0.000395074	a-c	31.5456	4850	A_IyII_1-3.raw	0/0					2.73033	0	0.09434
GDLAIHLVSPMGTR	High	Homo sapiens	P09958		0.0206		a-c
Confidence	Checked	Homo sapiens	Master Protein Accessions	Identifying Node	DeltaM [ppm]	Deltam/z [Da]	a-c	RT [min]	First Scan	Spectrum File	Ions Matched	Ions Score	Identity Strict	Identity Relaxed	Expectation Value	XCorr	Percolator q-Value	Percolator PEP
High	TRUE	Homo sapiens	P09958	Mascot (A2)	0.691059	0.000337877	a-c	33.0033	5156	A_IyII_1-3.raw	7/104	48.31	45	38	0.00482261		0	0.003665
High	TRUE	Homo sapiens	P09958	Sequest HT (A4)	0.691059	0.000337877	a-c	33.0033	5156	A_IyII_1-3.raw	0/0					4.208	0	0.0206
GDLAIHLVSPMGTR	High	Homo sapiens	P09958	1xOxidation [M11]	0.01581		a-c
Confidence	Checked	Homo sapiens	Master Protein Accessions	Identifying Node	DeltaM [ppm]	Deltam/z [Da]	a-c	RT [min]	First Scan	Spectrum File	Ions Matched	Ions Score	Identity Strict	Identity Relaxed	Expectation Value	XCorr	Percolator q-Value	Percolator PEP
High	TRUE	Homo sapiens	P09958	Sequest HT (A4)	0.614148	0.000303547	a-c	28.9417	4310	A_IyII_1-3.raw	0/0					3.67294	0	0.01581
High	TRUE	Homo sapiens	P09958	Sequest HT (A4)	0.675892	0.000334065	a-c	29.0928	4341	A_IyII_1-3.raw	0/0					2.54035	0.001107	0.1149
High	TRUE	Homo sapiens	P09958	Mascot (A2)	0.614148	0.000303547	a-c	28.9417	4310	A_IyII_1-3.raw	12/104	30.29	44	37	0.286795		0.001533	0.02796
FTLVLYGTAPEGLPVPPESSGCK	High	Homo sapiens	P09958	1xCarbamidomethyl [C22]	0.03178		a-c
Confidence	Checked	Homo sapiens	Master Protein Accessions	Identifying Node	DeltaM [ppm]	Deltam/z [Da]	a-c	RT [min]	First Scan	Spectrum File	Ions Matched	Ions Score	Identity Strict	Identity Relaxed	Expectation Value	XCorr	Percolator q-Value	Percolator PEP
High	TRUE	Homo sapiens	P09958	Sequest HT (A4)	1.05421	0.00127519	a-c	46.0894	7853	A_IyII_1-3.raw	0/0					4.56304	0	0.03178
High	TRUE	Homo sapiens	P09958	Sequest HT (A4)	0.49361	0.000398051	a-c	45.8426	7802	A_IyII_1-3.raw	0/0					3.35162	0.001107	0.1093
High	TRUE	Homo sapiens	P09958	Mascot (A2)	1.05421	0.00127519	a-c	46.0894	7853	A_IyII_1-3.raw	12/176	23.23	47	40	2.55374		0.002414	0.06689
High	TRUE	Homo sapiens	P09958	Sequest HT (A4)	0.947737	0.000764262	a-c	47.3842	8114	A_IyII_1-3.raw	0/0					3.40493	0.003158	0.1924
High	TRUE	Homo sapiens	P09958	Mascot (A2)	0.947737	0.000764262	a-c	47.3842	8114	A_IyII_1-3.raw	11/176	15.76	47	40	14.6109		0.004235	0.1614
KTVTACLGEPNHITR	High	Homo sapiens	P09958	1xCarbamidomethyl [C6]	0.04761		a-c
Confidence	Checked	Homo sapiens	Master Protein Accessions	Identifying Node	DeltaM [ppm]	Deltam/z [Da]	a-c	RT [min]	First Scan	Spectrum File	Ions Matched	Ions Score	Identity Strict	Identity Relaxed	Expectation Value	XCorr	Percolator q-Value	Percolator PEP
High	TRUE	Homo sapiens	P09958	Sequest HT (A4)	0.353466	0.000149948	a-c	19.2225	2404	A_IyII_1-3.raw	0/0					2.61924	0	0.04761
High	TRUE	Homo sapiens	P09958	Mascot (A2)	0.353466	0.000149948	a-c	19.2225	2404	A_IyII_1-3.raw	7/168	18.68	45	38	5.11245		0.001533	0.0295
TLTSSQACVVCEEGFSLHQK	High	Homo sapiens	P09958	2xCarbamidomethyl [C8; C11]	0.08192		a-c
Confidence	Checked	Homo sapiens	Master Protein Accessions	Identifying Node	DeltaM [ppm]	Deltam/z [Da]	a-c	RT [min]	First Scan	Spectrum File	Ions Matched	Ions Score	Identity Strict	Identity Relaxed	Expectation Value	XCorr	Percolator q-Value	Percolator PEP
High	TRUE	Homo sapiens	P09958	Sequest HT (A4)	0.538358	0.000409342	a-c	29.5321	4431	A_IyII_1-3.raw	0/0					3.60851	0	0.08192
RGDLAIHLVSPMGTR	High	Homo sapiens	P09958	1xOxidation [M12]	0.1287		a-c
Confidence	Checked	Homo sapiens	Master Protein Accessions	Identifying Node	DeltaM [ppm]	Deltam/z [Da]	a-c	RT [min]	First Scan	Spectrum File	Ions Matched	Ions Score	Identity Strict	Identity Relaxed	Expectation Value	XCorr	Percolator q-Value	Percolator PEP
High	TRUE	Homo sapiens	P09958	Sequest HT (A4)	1.48291	0.000810099	a-c	25.0731	3521	A_IyII_1-3.raw	0/0					2.49635	0.001107	0.1287
LAEEAFFRGVSQGR	High	Homo sapiens	P09958		0.1851		a-c
Confidence	Checked	Homo sapiens	Master Protein Accessions	Identifying Node	DeltaM [ppm]	Deltam/z [Da]	a-c	RT [min]	First Scan	Spectrum File	Ions Matched	Ions Score	Identity Strict	Identity Relaxed	Expectation Value	XCorr	Percolator q-Value	Percolator PEP
High	TRUE	Homo sapiens	P09958	Sequest HT (A4)	0.717681	0.000374821	a-c	30.4018	4610	A_IyII_1-3.raw	0/0					3.07967	0.003158	0.1851
Sequence	Confidence	Homo sapiens	Master Protein Accessions	Modifications	Percolator PEP Sequest HT		a-c
TPSAAYLWVGTGASEAEKTGAQELLR	High	Homo sapiens	P06396		8.619e-05		a-c
Confidence	Checked	Homo sapiens	Master Protein Accessions	Identifying Node	DeltaM [ppm]	Deltam/z [Da]	a-c	RT [min]	First Scan	Spectrum File	Ions Matched	Ions Score	Identity Strict	Identity Relaxed	Expectation Value	XCorr	Percolator q-Value	Percolator PEP
High	TRUE	Homo sapiens	P06396	Sequest HT (A4)	2.90589	0.00262147	a-c	40.9097	6797	A_IyII_1-3.raw	0/0					5.53008	0	8.619e-05
High	TRUE	Homo sapiens	P06396	Mascot (A2)	2.90589	0.00262147	a-c	40.9097	6797	A_IyII_1-3.raw	17/232	63.7	46	39	0.000211072		0	4.361e-05
DPDQTDGLGLSYLSSHIANVER	High	Homo sapiens	P06396		0.0003963		a-c
Confidence	Checked	Homo sapiens	Master Protein Accessions	Identifying Node	DeltaM [ppm]	Deltam/z [Da]	a-c	RT [min]	First Scan	Spectrum File	Ions Matched	Ions Score	Identity Strict	Identity Relaxed	Expectation Value	XCorr	Percolator q-Value	Percolator PEP
High	TRUE	Homo sapiens	P06396	Sequest HT (A4)	1.10606	0.000880107	a-c	41.478	6912	A_IyII_1-3.raw	0/0					5.0192	0	0.0003963
High	TRUE	Homo sapiens	P06396	Mascot (A2)	1.10606	0.000880107	a-c	41.478	6912	A_IyII_1-3.raw	12/240	31.48	46	39	0.303653		0	0.004639
VPFDAATLHTSTAMAAQHGMDDDGTGQK	High	Homo sapiens	P06396		0.007868		a-c
Confidence	Checked	Homo sapiens	Master Protein Accessions	Identifying Node	DeltaM [ppm]	Deltam/z [Da]	a-c	RT [min]	First Scan	Spectrum File	Ions Matched	Ions Score	Identity Strict	Identity Relaxed	Expectation Value	XCorr	Percolator q-Value	Percolator PEP
High	TRUE	Homo sapiens	P06396	Mascot (A2)	1.09647	0.000787615	a-c	29.8569	4497	A_IyII_1-3.raw	22/260	28.35	42	35	0.267725		0	0.0048
High	TRUE	Homo sapiens	P06396	Sequest HT (A4)	1.09647	0.000787615	a-c	29.8569	4497	A_IyII_1-3.raw	0/0					4.42943	0	0.007868
High	TRUE	Homo sapiens	P06396	Sequest HT (A4)	0.40015	0.000383248	a-c	29.9398	4514	A_IyII_1-3.raw	0/0					4.27877	0	0.0082
High	TRUE	Homo sapiens	P06396	Mascot (A2)	0.40015	0.000383248	a-c	29.9398	4514	A_IyII_1-3.raw	20/260	35.17	42	35	0.0548576		0	0.004361
EVQGFESATFLGYFK	High	Homo sapiens	P06396		0.002725		a-c
Confidence	Checked	Homo sapiens	Master Protein Accessions	Identifying Node	DeltaM [ppm]	Deltam/z [Da]	a-c	RT [min]	First Scan	Spectrum File	Ions Matched	Ions Score	Identity Strict	Identity Relaxed	Expectation Value	XCorr	Percolator q-Value	Percolator PEP
High	TRUE	Homo sapiens	P06396	Mascot (A2)	0.262743	0.000226332	a-c	48.7027	8380	A_IyII_1-3.raw	10/160	50.45	46	39	0.00380598		0	0.005086
High	TRUE	Homo sapiens	P06396	Sequest HT (A4)	0.262743	0.000226332	a-c	48.7027	8380	A_IyII_1-3.raw	0/0					4.39099	0	0.002725
QTQVSVLPEGGETPLFK	High	Homo sapiens	P06396		0.06957		a-c
Confidence	Checked	Homo sapiens	Master Protein Accessions	Identifying Node	DeltaM [ppm]	Deltam/z [Da]	a-c	RT [min]	First Scan	Spectrum File	Ions Matched	Ions Score	Identity Strict	Identity Relaxed	Expectation Value	XCorr	Percolator q-Value	Percolator PEP
High	TRUE	Homo sapiens	P06396	Sequest HT (A4)	0.952918	0.000581268	a-c	37.6461	6122	A_IyII_1-3.raw	0/0					2.70556	0	0.06957
Gelsolin OS=Homo sapiens GN=GSN PE=1 SV=1	P06396	Homo sapiens	85.644	13.8107	113.186	4	a-c
Sequence	Confidence		Master Protein Accessions	Modifications	Percolator PEP Sequest HT		a-c
KIEPELDGSAQVTSHDASTNGLINFIKQQR	High		P06744		4.956e-05		a-c
Confidence	Checked		Master Protein Accessions	Identifying Node	DeltaM [ppm]	Deltam/z [Da]	a-c	RT [min]	First Scan	Spectrum File	Ions Matched	Ions Score	Identity Strict	Identity Relaxed	Expectation Value	XCorr	Percolator q-Value	Percolator PEP
High	TRUE		P06744	Sequest HT (A4)	0.874545	0.000720775	a-c	34.8586	5542	A_IyII_1-3.raw	0/0					7.3955	0	4.956e-05
High	TRUE		P06744	Mascot (A2)	0.874545	0.000720775	a-c	34.8586	5542	A_IyII_1-3.raw	37/348	59.18	46	39	0.00055022		0	4.15e-05
High	TRUE		P06744	Mascot (A2)	0.611269	0.000403033	a-c	34.8444	5539	A_IyII_1-3.raw	31/348	46.51	46	39	0.0102487		0	0.00633
High	TRUE		P06744	Sequest HT (A4)	0.611269	0.000403033	a-c	34.8444	5539	A_IyII_1-3.raw	0/0					3.56261	0	0.05459
KIEPELDGSAQVTSHDASTNGLINFIK	High		P06744		0.0008528		a-c
Confidence	Checked		Master Protein Accessions	Identifying Node	DeltaM [ppm]	Deltam/z [Da]	a-c	RT [min]	First Scan	Spectrum File	Ions Matched	Ions Score	Identity Strict	Identity Relaxed	Expectation Value	XCorr	Percolator q-Value	Percolator PEP
High	TRUE		P06744	Sequest HT (A4)	0.916315	0.000660771	a-c	36.0032	5779	A_IyII_1-3.raw	0/0					7.20439	0	0.0008528
High	TRUE		P06744	Mascot (A2)	0.916315	0.000660771	a-c	36.0032	5779	A_IyII_1-3.raw	25/312	60.14	46	39	0.000473439		0	3.601e-05
High	TRUE		P06744	Sequest HT (A4)	1.19606	0.00115	a-c	36.0694	5793	A_IyII_1-3.raw	0/0					6.58144	0	0.0003357
High	TRUE		P06744	Mascot (A2)	1.19606	0.00115	a-c	36.0694	5793	A_IyII_1-3.raw	21/312	57.75	46	39	0.000813632		0	0.0004007
VDHQTGPIVWGEPGTNGQHAFYQLIHQGTK	High		P06744	1xDeamidated [N/Q]	0.01759		a-c
Confidence	Checked		Master Protein Accessions	Identifying Node	DeltaM [ppm]	Deltam/z [Da]	a-c	RT [min]	First Scan	Spectrum File	Ions Matched	Ions Score	Identity Strict	Identity Relaxed	Expectation Value	XCorr	Percolator q-Value	Percolator PEP
High	TRUE		P06744	Sequest HT (A4)	0.449332	0.000372565	a-c	38.8836	6377	A_IyII_1-3.raw	0/0					5.73087	0	0.01759
High	TRUE		P06744	Mascot (A2)	0.449332	0.000372565	a-c	38.8836	6377	A_IyII_1-3.raw	27/336	35.58	47	40	0.141612		0	0.02111
High	TRUE		P06744	Mascot (A2)	0.449332	0.000372565	a-c	38.8836	6377	A_IyII_1-3.raw	27/336	36.69	47	40	0.109673		0	0.02196
TLAQLNPESSLFIIASK	High		P06744		0.0006183		a-c
Confidence	Checked		Master Protein Accessions	Identifying Node	DeltaM [ppm]	Deltam/z [Da]	a-c	RT [min]	First Scan	Spectrum File	Ions Matched	Ions Score	Identity Strict	Identity Relaxed	Expectation Value	XCorr	Percolator q-Value	Percolator PEP
High	TRUE		P06744	Sequest HT (A4)	0.807572	0.000739742	a-c	46.6726	7971	A_IyII_1-3.raw	0/0					5.1106	0	0.0006183
High	TRUE		P06744	Mascot (A2)	0.807572	0.000739742	a-c	46.6726	7971	A_IyII_1-3.raw	13/180	71.18	44	37	1.91434e-05		0	2.679e-05
ILLANFLAQTEALMR	High		P06744		0.05454		a-c
Confidence	Checked		Master Protein Accessions	Identifying Node	DeltaM [ppm]	Deltam/z [Da]	a-c	RT [min]	First Scan	Spectrum File	Ions Matched	Ions Score	Identity Strict	Identity Relaxed	Expectation Value	XCorr	Percolator q-Value	Percolator PEP
High	TRUE		P06744	Mascot (A2)	1.53595	0.00130859	a-c	73.501	13366	A_IyII_1-3.raw	9/152	71.05	43	36	1.82214e-05		0	0.00414
High	TRUE		P06744	Sequest HT (A4)	0.847481	0.000481355	a-c	73.6104	13388	A_IyII_1-3.raw	0/0					1.76903	0	0.09637
High	TRUE		P06744	Sequest HT (A4)	1.53595	0.00130859	a-c	73.501	13366	A_IyII_1-3.raw	0/0					4.18709	0	0.05454
High	TRUE		P06744	Mascot (A2)	0.847481	0.000481355	a-c	73.6104	13388	A_IyII_1-3.raw	8/152	8.25	44	37	38.6702		0.001533	0.02923
ILLANFLAQTEALMR	High		P06744	1xOxidation [M14]	0.008796		a-c
Confidence	Checked		Master Protein Accessions	Identifying Node	DeltaM [ppm]	Deltam/z [Da]	a-c	RT [min]	First Scan	Spectrum File	Ions Matched	Ions Score	Identity Strict	Identity Relaxed	Expectation Value	XCorr	Percolator q-Value	Percolator PEP
High	TRUE		P06744	Sequest HT (A4)	1.28435	0.00110451	a-c	57.2098	10091	A_IyII_1-3.raw	0/0					2.87011	0	0.008796
High	TRUE		P06744	Mascot (A2)	1.28435	0.00110451	a-c	57.2098	10091	A_IyII_1-3.raw	9/152	31.48	44	37	0.203692		0	0.004711
MIPCDFLIPVQTQHPIRK	High		P06744	1xCarbamidomethyl [C4]	0.0681		a-c
Confidence	Checked		Master Protein Accessions	Identifying Node	DeltaM [ppm]	Deltam/z [Da]	a-c	RT [min]	First Scan	Spectrum File	Ions Matched	Ions Score	Identity Strict	Identity Relaxed	Expectation Value	XCorr	Percolator q-Value	Percolator PEP
High	TRUE		P06744	Sequest HT (A4)	0.678757	0.000372157	a-c	34.1742	5399	A_IyII_1-3.raw	0/0					3.52853	0	0.0681
High	TRUE		P06744	Mascot (A2)	0.678757	0.000372157	a-c	34.1742	5399	A_IyII_1-3.raw	15/164	10.25	45	38	32.4427		0.002414	0.06241
IEPELDGSAQVTSHDASTNGLINFIK	High		P06744		0.09534		a-c
Confidence	Checked		Master Protein Accessions	Identifying Node	DeltaM [ppm]	Deltam/z [Da]	a-c	RT [min]	First Scan	Spectrum File	Ions Matched	Ions Score	Identity Strict	Identity Relaxed	Expectation Value	XCorr	Percolator q-Value	Percolator PEP
High	TRUE		P06744	Sequest HT (A4)	1.47026	0.00135086	a-c	39.5445	6515	A_IyII_1-3.raw	0/0					3.63465	0	0.09534
VFEGNRPTNSIVFTK	High		P06744; Q6P6V0		0.1697		a-c
Confidence	Checked		Master Protein Accessions	Identifying Node	DeltaM [ppm]	Deltam/z [Da]	a-c	RT [min]	First Scan	Spectrum File	Ions Matched	Ions Score	Identity Strict	Identity Relaxed	Expectation Value	XCorr	Percolator q-Value	Percolator PEP
High	TRUE		P06744; Q6P6V0	Sequest HT (A4)	0.863882	0.000492096	a-c	26.7204	3854	A_IyII_1-3.raw	0/0					2.66716	0.002128	0.1697
Guanylate-binding protein 6 OS=Pongo abelii GN=GBP6 PE=2 SV=1	Q5R9T9	Pongo abelii	72.318	11.2164	70.6467	4	a-c
Sequence	Confidence		Master Protein Accessions	Modifications	Percolator PEP Sequest HT		a-c
SPEELEKLLPHKVFEGNRPTNSIVFTK	High		Q6P6V0		0.08716		a-c
Confidence	Checked		Master Protein Accessions	Identifying Node	DeltaM [ppm]	Deltam/z [Da]	a-c	RT [min]	First Scan	Spectrum File	Ions Matched	Ions Score	Identity Strict	Identity Relaxed	Expectation Value	XCorr	Percolator q-Value	Percolator PEP
High	TRUE		Q6P6V0	Sequest HT (A4)	0.404928	0.000251839	a-c	34.8489	5540	A_IyII_1-3.raw	0/0					2.99011	0	0.08716
VFEGNRPTNSIVFTK	High		P06744; Q6P6V0		0.1697		a-c
Confidence	Checked		Master Protein Accessions	Identifying Node	DeltaM [ppm]	Deltam/z [Da]	a-c	RT [min]	First Scan	Spectrum File	Ions Matched	Ions Score	Identity Strict	Identity Relaxed	Expectation Value	XCorr	Percolator q-Value	Percolator PEP
High	TRUE		P06744; Q6P6V0	Sequest HT (A4)	0.863882	0.000492096	a-c	26.7204	3854	A_IyII_1-3.raw	0/0					2.66716	0.002128	0.1697
Sequence	Confidence		Master Protein Accessions	Modifications	Percolator PEP Sequest HT		a-c
MPPYDEQTQAFIDAAQEAR	High		P14314	1xOxidation [M1]	0.001507		a-c
Confidence	Checked		Master Protein Accessions	Identifying Node	DeltaM [ppm]	Deltam/z [Da]	a-c	RT [min]	First Scan	Spectrum File	Ions Matched	Ions Score	Identity Strict	Identity Relaxed	Expectation Value	XCorr	Percolator q-Value	Percolator PEP
High	TRUE		P14314	Sequest HT (A4)	0.214534	0.00015711	a-c	38.0206	6200	A_IyII_1-3.raw	0/0					4.98914	0	0.001507
High	TRUE		P14314	Mascot (A2)	0.214534	0.00015711	a-c	38.0206	6200	A_IyII_1-3.raw	10/192	41.5	42	35	0.0124315		0	0.001489
MPPYDEQTQAFIDAAQEAR	High		P14314		0.001565		a-c
Confidence	Checked		Master Protein Accessions	Identifying Node	DeltaM [ppm]	Deltam/z [Da]	a-c	RT [min]	First Scan	Spectrum File	Ions Matched	Ions Score	Identity Strict	Identity Relaxed	Expectation Value	XCorr	Percolator q-Value	Percolator PEP
High	TRUE		P14314	Sequest HT (A4)	0.683104	0.000496615	a-c	40.0713	6623	A_IyII_1-3.raw	0/0					5.90851	0	0.001565
High	TRUE		P14314	Mascot (A2)	0.683104	0.000496615	a-c	40.0713	6623	A_IyII_1-3.raw	14/192	28.25	43	36	0.310619		0	0.003034
YEQGTGCWQGPNR	High		Q28034; P14314	1xCarbamidomethyl [C7]	0.03052		a-c
Confidence	Checked		Master Protein Accessions	Identifying Node	DeltaM [ppm]	Deltam/z [Da]	a-c	RT [min]	First Scan	Spectrum File	Ions Matched	Ions Score	Identity Strict	Identity Relaxed	Expectation Value	XCorr	Percolator q-Value	Percolator PEP
High	TRUE		Q28034; P14314	Mascot (A2)	0.999473	0.000775921	a-c	22.4387	2988	A_IyII_1-3.raw	7/136	32.63	38	31	0.0382303		0	0.01983
High	TRUE		Q28034; P14314	Sequest HT (A4)	0.999473	0.000775921	a-c	22.4387	2988	A_IyII_1-3.raw	0/0					1.86768	0	0.03052
DGSDEPGTAACPNGSFHCTNTGYKPLYIPSNR	High		P14314	1xDeamidated [N13]; 2xCarbamidomethyl [C11; C18]	0.1394		a-c
Confidence	Checked		Master Protein Accessions	Identifying Node	DeltaM [ppm]	Deltam/z [Da]	a-c	RT [min]	First Scan	Spectrum File	Ions Matched	Ions Score	Identity Strict	Identity Relaxed	Expectation Value	XCorr	Percolator q-Value	Percolator PEP
High	TRUE		P14314	Mascot (A2)	0.387931	0.000337938	a-c	30.9897	4733	A_IyII_1-3.raw	14/324	20.94	39	32	0.788063		0	0.02305
High	TRUE		P14314	Sequest HT (A4)	0.387931	0.000337938	a-c	30.9897	4733	A_IyII_1-3.raw	0/0					2.52698	0.001107	0.1394
LWEEQLAAAK	High		P14314		0.03722		a-c
Confidence	Checked		Master Protein Accessions	Identifying Node	DeltaM [ppm]	Deltam/z [Da]	a-c	RT [min]	First Scan	Spectrum File	Ions Matched	Ions Score	Identity Strict	Identity Relaxed	Expectation Value	XCorr	Percolator q-Value	Percolator PEP
High	TRUE		P14314	Sequest HT (A4)	0.679031	0.000393368	a-c	30.1541	4558	A_IyII_1-3.raw	0/0					3.10143	0	0.03722
High	TRUE		P14314	Mascot (A2)	0.679031	0.000393368	a-c	30.1541	4558	A_IyII_1-3.raw	16/92	53.37	45	38	0.00178142		0	0.0117
SLKDMEESIR	High		Q28034; P14314		0.09873		a-c
Confidence	Checked		Master Protein Accessions	Identifying Node	DeltaM [ppm]	Deltam/z [Da]	a-c	RT [min]	First Scan	Spectrum File	Ions Matched	Ions Score	Identity Strict	Identity Relaxed	Expectation Value	XCorr	Percolator q-Value	Percolator PEP
High	TRUE		Q28034; P14314	Sequest HT (A4)	0.0374276	1.50659e-05	a-c	25.3051	3568	A_IyII_1-3.raw	0/0					1.96685	0	0.09873
High	TRUE		Q28034; P14314	Mascot (A2)	0.0374276	1.50659e-05	a-c	25.3051	3568	A_IyII_1-3.raw	5/100	25.11	45	38	1.21709		0.001533	0.03754
ESLQQMAEVTR	High		P14314		0.05469		a-c
Confidence	Checked		Master Protein Accessions	Identifying Node	DeltaM [ppm]	Deltam/z [Da]	a-c	RT [min]	First Scan	Spectrum File	Ions Matched	Ions Score	Identity Strict	Identity Relaxed	Expectation Value	XCorr	Percolator q-Value	Percolator PEP
High	TRUE		P14314	Sequest HT (A4)	1.28674	0.000830994	a-c	28.8776	4297	A_IyII_1-3.raw	0/0					3.08328	0	0.05469
High	TRUE		P14314	Mascot (A2)	1.28674	0.000830994	a-c	28.8776	4297	A_IyII_1-3.raw	7/108	36.12	45	38	0.0823314		0.002414	0.06414
Keratin, type II cytoskeletal 4 OS=Homo sapiens GN=KRT4 PE=1 SV=4	P19013	Homo sapiens	57.25	17.0412	103.456	4	a-c
Sequence	Confidence	Homo sapiens	Master Protein Accessions	Modifications	Percolator PEP Sequest HT		a-c
IIAEYIWIGGSGLDMR	High	Homo sapiens	Q42899		0.1425		a-c
Confidence	Checked	Homo sapiens	Master Protein Accessions	Identifying Node	DeltaM [ppm]	Deltam/z [Da]	a-c	RT [min]	First Scan	Spectrum File	Ions Matched	Ions Score	Identity Strict	Identity Relaxed	Expectation Value	XCorr	Percolator q-Value	Percolator PEP
High	TRUE	Homo sapiens	Q42899	Sequest HT (A4)	0.814137	0.000730251	a-c	52.6623	9180	A_IyII_1-3.raw	0/0					2.112	0.001107	0.1425
High	TRUE	Homo sapiens	Q42899	Mascot (A2)	0.814137	0.000730251	a-c	52.6623	9180	A_IyII_1-3.raw	5/120	6.11	46	39	115.4		0.004235	0.1335
Sequence	Confidence	Homo sapiens	Master Protein Accessions	Modifications	Percolator PEP Sequest HT		a-c
IFSHPDVVAEEPWYGIEQEYTLLQK	High	Homo sapiens	P32289		0.1074		a-c
Confidence	Checked	Homo sapiens	Master Protein Accessions	Identifying Node	DeltaM [ppm]	Deltam/z [Da]	a-c	RT [min]	First Scan	Spectrum File	Ions Matched	Ions Score	Identity Strict	Identity Relaxed	Expectation Value	XCorr	Percolator q-Value	Percolator PEP
High	TRUE	Homo sapiens	P32289	Sequest HT (A4)	0.995139	0.000992312	a-c	59.4131	10525	A_IyII_1-3.raw	0/0					3.04028	0.001107	0.1074
Sequence	Confidence	Homo sapiens	Master Protein Accessions	Modifications	Percolator PEP Sequest HT		a-c
LQAIEHELHELGLLK	High	Homo sapiens	Q16769		0.0005207		a-c
Confidence	Checked	Homo sapiens	Master Protein Accessions	Identifying Node	DeltaM [ppm]	Deltam/z [Da]	a-c	RT [min]	First Scan	Spectrum File	Ions Matched	Ions Score	Identity Strict	Identity Relaxed	Expectation Value	XCorr	Percolator q-Value	Percolator PEP
High	TRUE	Homo sapiens	Q16769	Mascot (A2)	0.880156	0.000511365	a-c	39.4239	6490	A_IyII_1-3.raw	11/164	36.88	44	37	0.0517201		0	0.0008605
High	TRUE	Homo sapiens	Q16769	Sequest HT (A4)	0.880156	0.000511365	a-c	39.4239	6490	A_IyII_1-3.raw	0/0					5.3772	0	0.0005207
High	TRUE	Homo sapiens	Q16769	Sequest HT (A4)	0.662336	0.000288609	a-c	39.3341	6471	A_IyII_1-3.raw	0/0					3.92015	0.002128	0.1756
High	TRUE	Homo sapiens	Q16769	Mascot (A2)	0.662336	0.000288609	a-c	39.3341	6471	A_IyII_1-3.raw	9/164	17.65	43	36	4.26299		0.002414	0.06785
VFVGATDSAVPCAMMLELAR	High	Homo sapiens	Q16769	1xCarbamidomethyl [C12]	0.3906		a-c
Confidence	Checked	Homo sapiens	Master Protein Accessions	Identifying Node	DeltaM [ppm]	Deltam/z [Da]	a-c	RT [min]	First Scan	Spectrum File	Ions Matched	Ions Score	Identity Strict	Identity Relaxed	Expectation Value	XCorr	Percolator q-Value	Percolator PEP
High	TRUE	Homo sapiens	Q16769	Mascot (A2)	1.46511	0.00156623	a-c	52.0904	9065	A_IyII_1-3.raw	7/152	11.64	46	39	31.4365		0.004235	0.166
Sequence	Confidence	Homo sapiens	Master Protein Accessions	Modifications	Percolator PEP Sequest HT		a-c
VIISAPSADAPMFVMGVNHEKYDK	High	Homo sapiens	O57479	1xOxidation [M15]	0.0005683		a-c
Confidence	Checked	Homo sapiens	Master Protein Accessions	Identifying Node	DeltaM [ppm]	Deltam/z [Da]	a-c	RT [min]	First Scan	Spectrum File	Ions Matched	Ions Score	Identity Strict	Identity Relaxed	Expectation Value	XCorr	Percolator q-Value	Percolator PEP
High	TRUE	Homo sapiens	O57479	Sequest HT (A4)	1.56692	0.00103232	a-c	32.3503	5019	A_IyII_1-3.raw	0/0					4.47117	0	0.0005683
High	TRUE	Homo sapiens	O57479	Mascot (A2)	1.56692	0.00103232	a-c	32.3503	5019	A_IyII_1-3.raw	24/208	50.33	47	40	0.00471988		0	0.0001126
VIISAPSADAPMFVMGVNHEKYDK	High	Homo sapiens	O57479		0.002469		a-c
Confidence	Checked	Homo sapiens	Master Protein Accessions	Identifying Node	DeltaM [ppm]	Deltam/z [Da]	a-c	RT [min]	First Scan	Spectrum File	Ions Matched	Ions Score	Identity Strict	Identity Relaxed	Expectation Value	XCorr	Percolator q-Value	Percolator PEP
High	TRUE	Homo sapiens	O57479	Sequest HT (A4)	1.03325	0.000676597	a-c	35.4749	5670	A_IyII_1-3.raw	0/0					4.36398	0	0.002469
High	TRUE	Homo sapiens	O57479	Mascot (A2)	1.03325	0.000676597	a-c	35.4749	5670	A_IyII_1-3.raw	16/208	44.72	47	40	0.0185407		0	0.0004419
VIHDNFGIVEGLMTTVHAITATQK	High	Homo sapiens	O57479		0.02574		a-c
Confidence	Checked	Homo sapiens	Master Protein Accessions	Identifying Node	DeltaM [ppm]	Deltam/z [Da]	a-c	RT [min]	First Scan	Spectrum File	Ions Matched	Ions Score	Identity Strict	Identity Relaxed	Expectation Value	XCorr	Percolator q-Value	Percolator PEP
High	TRUE	Homo sapiens	O57479	Sequest HT (A4)	0.785894	0.000679893	a-c	62.3688	11121	A_IyII_1-3.raw	0/0					3.74703	0	0.05082
High	TRUE	Homo sapiens	O57479	Sequest HT (A4)	0.96885	0.000628628	a-c	62.3635	11120	A_IyII_1-3.raw	0/0					4.10222	0	0.02574
High	TRUE	Homo sapiens	O57479	Mascot (A2)	0.96885	0.000628628	a-c	62.3635	11120	A_IyII_1-3.raw	24/260	22.85	45	38	1.92708		0	0.009345
High	TRUE	Homo sapiens	O57479	Mascot (A2)	0.785894	0.000679893	a-c	62.3688	11121	A_IyII_1-3.raw	11/260	22.84	45	38	1.93335		0.002414	0.08052
RVIISAPSADAPMFVMGVNHEKYDK	High	Homo sapiens	O57479		0.0008419		a-c
Confidence	Checked	Homo sapiens	Master Protein Accessions	Identifying Node	DeltaM [ppm]	Deltam/z [Da]	a-c	RT [min]	First Scan	Spectrum File	Ions Matched	Ions Score	Identity Strict	Identity Relaxed	Expectation Value	XCorr	Percolator q-Value	Percolator PEP
High	TRUE	Homo sapiens	O57479	Sequest HT (A4)	-0.269628	-0.000187081	a-c	32.1604	4979	A_IyII_1-3.raw	0/0					4.90918	0	0.0008419
High	TRUE	Homo sapiens	O57479	Mascot (A2)	-0.269628	-0.000187081	a-c	32.1604	4979	A_IyII_1-3.raw	28/288	33.23	47	40	0.247911		0	0.0005813
VIHDNFGIVEGLMTTVHAITATQK	High	Homo sapiens	O57479	1xOxidation [M13]	0.09282		a-c
Confidence	Checked	Homo sapiens	Master Protein Accessions	Identifying Node	DeltaM [ppm]	Deltam/z [Da]	a-c	RT [min]	First Scan	Spectrum File	Ions Matched	Ions Score	Identity Strict	Identity Relaxed	Expectation Value	XCorr	Percolator q-Value	Percolator PEP
High	TRUE	Homo sapiens	O57479	Sequest HT (A4)	2.35438	0.00204937	a-c	42.5961	7141	A_IyII_1-3.raw	0/0					3.40897	0	0.09282
High	TRUE	Homo sapiens	O57479	Mascot (A2)	2.35438	0.00204937	a-c	42.5961	7141	A_IyII_1-3.raw	9/260	12.47	46	39	22.7543		0.006202	0.1866
WD repeat-containing protein 1 OS=Homo sapiens GN=WDR1 PE=1 SV=4	O75083	Homo sapiens	66.152	14.3564	77.54	4	a-c
Sequence	Confidence	Homo sapiens	Master Protein Accessions	Modifications	Percolator PEP Sequest HT		a-c
LGDAVEQGVINNTVLGYFIGR	High	Homo sapiens	P41250		0.1057		a-c
Confidence	Checked	Homo sapiens	Master Protein Accessions	Identifying Node	DeltaM [ppm]	Deltam/z [Da]	a-c	RT [min]	First Scan	Spectrum File	Ions Matched	Ions Score	Identity Strict	Identity Relaxed	Expectation Value	XCorr	Percolator q-Value	Percolator PEP
High	TRUE	Homo sapiens	P41250	Sequest HT (A4)	0.102495	7.63652e-05	a-c	70.7347	12811	A_IyII_1-3.raw	0/0					2.90062	0.001107	0.1057
Sequence	Confidence	Homo sapiens	Master Protein Accessions	Modifications	Percolator PEP Sequest HT		a-c
CFIFDRPTNDKDLLANIEK	High	Homo sapiens	Q5R9T9	1xCarbamidomethyl [C1]			a-c
Confidence	Checked	Homo sapiens	Master Protein Accessions	Identifying Node	DeltaM [ppm]	Deltam/z [Da]	a-c	RT [min]	First Scan	Spectrum File	Ions Matched	Ions Score	Identity Strict	Identity Relaxed	Expectation Value	XCorr	Percolator q-Value	Percolator PEP
High	TRUE	Homo sapiens	Q5R9T9	Mascot (A2)	0.688029	0.000397192	a-c	35.6918	5715	A_IyII_1-3.raw	10/196	14.28	47	40	18.7428		0	0.01888
EAIAIFMEHSFKDENQEFQK	High	Homo sapiens	Q5R9T9; Q6ZN66		0.005221		a-c
Confidence	Checked	Homo sapiens	Master Protein Accessions	Identifying Node	DeltaM [ppm]	Deltam/z [Da]	a-c	RT [min]	First Scan	Spectrum File	Ions Matched	Ions Score	Identity Strict	Identity Relaxed	Expectation Value	XCorr	Percolator q-Value	Percolator PEP
High	TRUE	Homo sapiens	Q5R9T9; Q6ZN66	Sequest HT (A4)	0.955436	0.000777452	a-c	35.9316	5764	A_IyII_1-3.raw	0/0					3.4493	0	0.001826
High	TRUE	Homo sapiens	Q5R9T9; Q6ZN66	Mascot (A2)	0.955436	0.000777452	a-c	35.9316	5764	A_IyII_1-3.raw	15/184	13.88	45	38	15.0853		0	0.02523
High	TRUE	Homo sapiens	Q5R9T9; Q6ZN66	Sequest HT (A4)	1.09994	0.00067128	a-c	35.8943	5756	A_IyII_1-3.raw	0/0					5.18729	0	0.005221
High	TRUE	Homo sapiens	Q5R9T9; Q6ZN66	Mascot (A2)	1.09994	0.00067128	a-c	35.8943	5756	A_IyII_1-3.raw	19/184	22.86	45	38	1.88435		0	0.00505
AADYYSQQMAQR	High	Homo sapiens	Q5R9T9; Q6ZN66		0.01602		a-c
Confidence	Checked	Homo sapiens	Master Protein Accessions	Identifying Node	DeltaM [ppm]	Deltam/z [Da]	a-c	RT [min]	First Scan	Spectrum File	Ions Matched	Ions Score	Identity Strict	Identity Relaxed	Expectation Value	XCorr	Percolator q-Value	Percolator PEP
High	TRUE	Homo sapiens	Q5R9T9; Q6ZN66	Mascot (A2)	1.35661	0.000971081	a-c	22.6454	3030	A_IyII_1-3.raw	16/108	63.77	40	33	4.24166e-05		0	0.001859
High	TRUE	Homo sapiens	Q5R9T9; Q6ZN66	Sequest HT (A4)	1.35661	0.000971081	a-c	22.6454	3030	A_IyII_1-3.raw	0/0					3.86395	0	0.01602
KGDFLLQNEESSVQYCQAK	High	Homo sapiens	Q5R9T9; Q6ZN66	1xCarbamidomethyl [C16]	0.009463		a-c
Confidence	Checked	Homo sapiens	Master Protein Accessions	Identifying Node	DeltaM [ppm]	Deltam/z [Da]	a-c	RT [min]	First Scan	Spectrum File	Ions Matched	Ions Score	Identity Strict	Identity Relaxed	Expectation Value	XCorr	Percolator q-Value	Percolator PEP
High	TRUE	Homo sapiens	Q5R9T9; Q6ZN66	Sequest HT (A4)	1.34665	0.00100732	a-c	29.3134	4386	A_IyII_1-3.raw	0/0					4.90355	0	0.009463
High	TRUE	Homo sapiens	Q5R9T9; Q6ZN66	Mascot (A2)	1.34665	0.00100732	a-c	29.3134	4386	A_IyII_1-3.raw	16/216	31.35	45	38	0.288476		0	0.006969
EAIAIFMEHSFKDENQEFQKK	High	Homo sapiens	Q5R9T9; Q6ZN66		0.1167		a-c
Confidence	Checked	Homo sapiens	Master Protein Accessions	Identifying Node	DeltaM [ppm]	Deltam/z [Da]	a-c	RT [min]	First Scan	Spectrum File	Ions Matched	Ions Score	Identity Strict	Identity Relaxed	Expectation Value	XCorr	Percolator q-Value	Percolator PEP
High	TRUE	Homo sapiens	Q5R9T9; Q6ZN66	Sequest HT (A4)	0.900347	0.000462642	a-c	32.8656	5127	A_IyII_1-3.raw	0/0					3.75684	0.001107	0.1167
Bifunctional purine biosynthesis protein PURH OS=Homo sapiens GN=ATIC PE=1 SV=3	P31939	Homo sapiens	64.575	8.78378	55.0933	3	a-c
Sequence	Confidence	Homo sapiens	Master Protein Accessions	Modifications	Percolator PEP Sequest HT		a-c
QTQIFTTYSDNQPGVLIQVYEGER	High	Homo sapiens	Q5R7D3		0.00302		a-c
Confidence	Checked	Homo sapiens	Master Protein Accessions	Identifying Node	DeltaM [ppm]	Deltam/z [Da]	a-c	RT [min]	First Scan	Spectrum File	Ions Matched	Ions Score	Identity Strict	Identity Relaxed	Expectation Value	XCorr	Percolator q-Value	Percolator PEP
High	TRUE	Homo sapiens	Q5R7D3	Sequest HT (A4)	1.82882	0.00169859	a-c	44.0907	7447	A_IyII_1-3.raw	0/0					4.80156	0	0.00302
High	TRUE	Homo sapiens	Q5R7D3	Mascot (A2)	1.82882	0.00169859	a-c	44.0907	7447	A_IyII_1-3.raw	7/276	27.44	46	39	0.897632		0	0.004113
ELEQVCNPIISGLYQGAGGPGPGGFGAQGPK	High	Homo sapiens	Q5R7D3	1xCarbamidomethyl [C6]	0.0008259		a-c
Confidence	Checked	Homo sapiens	Master Protein Accessions	Identifying Node	DeltaM [ppm]	Deltam/z [Da]	a-c	RT [min]	First Scan	Spectrum File	Ions Matched	Ions Score	Identity Strict	Identity Relaxed	Expectation Value	XCorr	Percolator q-Value	Percolator PEP
High	TRUE	Homo sapiens	Q5R7D3	Sequest HT (A4)	0.572784	0.000583379	a-c	45.1595	7663	A_IyII_1-3.raw	0/0					8.18241	0	0.0008259
High	TRUE	Homo sapiens	Q5R7D3	Mascot (A2)	0.572784	0.000583379	a-c	45.1595	7663	A_IyII_1-3.raw	38/348	70.21	47	40	4.97264e-05		0	0.000237
IINEPTAAAIAYGLDR	High	Homo sapiens	Q5R7D3		0.004207		a-c
Confidence	Checked	Homo sapiens	Master Protein Accessions	Identifying Node	DeltaM [ppm]	Deltam/z [Da]	a-c	RT [min]	First Scan	Spectrum File	Ions Matched	Ions Score	Identity Strict	Identity Relaxed	Expectation Value	XCorr	Percolator q-Value	Percolator PEP
High	TRUE	Homo sapiens	Q5R7D3	Sequest HT (A4)	-0.0120832	-6.79844e-06	a-c	37.9772	6191	A_IyII_1-3.raw	0/0					4.54273	0	0.004207
High	TRUE	Homo sapiens	Q5R7D3	Mascot (A2)	-0.0120832	-6.79844e-06	a-c	37.9772	6191	A_IyII_1-3.raw	12/172	53.93	46	39	0.00177467		0	0.0005231
CQEVISWLDANTLAEKDEFEHK	High	Homo sapiens	Q5R7D3	1xCarbamidomethyl [C1]	0.006135		a-c
Confidence	Checked	Homo sapiens	Master Protein Accessions	Identifying Node	DeltaM [ppm]	Deltam/z [Da]	a-c	RT [min]	First Scan	Spectrum File	Ions Matched	Ions Score	Identity Strict	Identity Relaxed	Expectation Value	XCorr	Percolator q-Value	Percolator PEP
High	TRUE	Homo sapiens	Q5R7D3	Sequest HT (A4)	0.78892	0.000525075	a-c	38.4994	6298	A_IyII_1-3.raw	0/0					5.80332	0	0.006135
High	TRUE	Homo sapiens	Q5R7D3	Mascot (A2)	0.78892	0.000525075	a-c	38.4994	6298	A_IyII_1-3.raw	23/248	44.25	45	38	0.0132088		0	0.002269
High	TRUE	Homo sapiens	Q5R7D3	Mascot (A2)	0.106185	9.42304e-05	a-c	38.5103	6300	A_IyII_1-3.raw	11/248	31.74	45	38	0.235665		0	0.0007129
High	TRUE	Homo sapiens	Q5R7D3	Sequest HT (A4)	0.106185	9.42304e-05	a-c	38.5103	6300	A_IyII_1-3.raw	0/0					5.32577	0	0.000412
NQVALNPQNTVFDAKR	High	Homo sapiens	Q5R7D3		0.02315		a-c
Confidence	Checked	Homo sapiens	Master Protein Accessions	Identifying Node	DeltaM [ppm]	Deltam/z [Da]	a-c	RT [min]	First Scan	Spectrum File	Ions Matched	Ions Score	Identity Strict	Identity Relaxed	Expectation Value	XCorr	Percolator q-Value	Percolator PEP
High	TRUE	Homo sapiens	Q5R7D3	Sequest HT (A4)	1.88782	0.0011421	a-c	27.3502	3983	A_IyII_1-3.raw	0/0					3.49978	0	0.02315
High	TRUE	Homo sapiens	Q5R7D3	Mascot (A2)	1.88782	0.0011421	a-c	27.3502	3983	A_IyII_1-3.raw	13/180	24.92	46	39	1.34882		0	0.0158
SINPDEAVAYGAAVQAAILMGDK	High	Homo sapiens	Q5R7D3		3.583e-05		a-c
Confidence	Checked	Homo sapiens	Master Protein Accessions	Identifying Node	DeltaM [ppm]	Deltam/z [Da]	a-c	RT [min]	First Scan	Spectrum File	Ions Matched	Ions Score	Identity Strict	Identity Relaxed	Expectation Value	XCorr	Percolator q-Value	Percolator PEP
High	TRUE	Homo sapiens	Q5R7D3	Sequest HT (A4)	0.775433	0.000893359	a-c	67.4941	12154	A_IyII_1-3.raw	0/0					5.84084	0	3.583e-05
High	TRUE	Homo sapiens	Q5R7D3	Mascot (A2)	0.775433	0.000893359	a-c	67.4941	12154	A_IyII_1-3.raw	14/256	87.29	46	39	9.15833e-07		0	1.216e-06
High	TRUE	Homo sapiens	Q5R7D3	Sequest HT (A4)	-1.61443	-0.00123996	a-c	67.3938	12133	A_IyII_1-3.raw	0/0					4.9103	0	0.001979
High	TRUE	Homo sapiens	Q5R7D3	Mascot (A2)	-1.61443	-0.00123996	a-c	67.3938	12133	A_IyII_1-3.raw	28/256	41.68	46	39	0.033933		0	0.02106
SINPDEAVAYGAAVQAAILMGDK	High	Homo sapiens	Q5R7D3	1xOxidation [M20]	0.002677		a-c
Confidence	Checked	Homo sapiens	Master Protein Accessions	Identifying Node	DeltaM [ppm]	Deltam/z [Da]	a-c	RT [min]	First Scan	Spectrum File	Ions Matched	Ions Score	Identity Strict	Identity Relaxed	Expectation Value	XCorr	Percolator q-Value	Percolator PEP
High	TRUE	Homo sapiens	Q5R7D3	Sequest HT (A4)	2.11995	0.0024593	a-c	62.1571	11078	A_IyII_1-3.raw	0/0					3.46975	0	0.002677
High	TRUE	Homo sapiens	Q5R7D3	Mascot (A2)	2.11995	0.0024593	a-c	62.1571	11078	A_IyII_1-3.raw	10/256	34.29	47	40	0.195636		0	0.004481
TTPSYVAFTDTER	High	Homo sapiens	P19120; P11147; Q5R7D3		0.02333		a-c
Confidence	Checked	Homo sapiens	Master Protein Accessions	Identifying Node	DeltaM [ppm]	Deltam/z [Da]	a-c	RT [min]	First Scan	Spectrum File	Ions Matched	Ions Score	Identity Strict	Identity Relaxed	Expectation Value	XCorr	Percolator q-Value	Percolator PEP
High	TRUE	Homo sapiens	P19120; P11147; Q5R7D3	Sequest HT (A4)	0.872667	0.000649134	a-c	30.0817	4543	A_IyII_1-3.raw	0/0					3.42735	0	0.02333
High	TRUE	Homo sapiens	P19120; P11147; Q5R7D3	Mascot (A2)	0.872667	0.000649134	a-c	30.0817	4543	A_IyII_1-3.raw	10/96	55.09	43	36	0.000733004		0	0.002832
AQIHDIVLVGGSTR	High	Homo sapiens	Q5R7D3		0.07015		a-c
Confidence	Checked	Homo sapiens	Master Protein Accessions	Identifying Node	DeltaM [ppm]	Deltam/z [Da]	a-c	RT [min]	First Scan	Spectrum File	Ions Matched	Ions Score	Identity Strict	Identity Relaxed	Expectation Value	XCorr	Percolator q-Value	Percolator PEP
High	TRUE	Homo sapiens	Q5R7D3	Sequest HT (A4)	1.76897	0.00129649	a-c	28.0278	4121	A_IyII_1-3.raw	0/0					2.59082	0	0.07015
High	TRUE	Homo sapiens	Q5R7D3	Sequest HT (A4)	1.32259	0.000646223	a-c	27.9542	4106	A_IyII_1-3.raw	0/0					2.40497	0	0.02002
High	TRUE	Homo sapiens	Q5R7D3	Mascot (A2)	1.32259	0.000646223	a-c	27.9542	4106	A_IyII_1-3.raw	13/152	29.98	43	36	0.238496		0.001533	0.02861
High	TRUE	Homo sapiens	Q5R7D3	Mascot (A2)	1.76897	0.00129649	a-c	28.0278	4121	A_IyII_1-3.raw	7/152	29.11	43	36	0.291394		0.004235	0.1138
ATAGDTHLGGEDFDNR	High	Homo sapiens	Q5R7D3		0.04597		a-c
Confidence	Checked	Homo sapiens	Master Protein Accessions	Identifying Node	DeltaM [ppm]	Deltam/z [Da]	a-c	RT [min]	First Scan	Spectrum File	Ions Matched	Ions Score	Identity Strict	Identity Relaxed	Expectation Value	XCorr	Percolator q-Value	Percolator PEP
High	TRUE	Homo sapiens	Q5R7D3	Sequest HT (A4)	0.885794	0.000494784	a-c	21.9878	2897	A_IyII_1-3.raw	0/0					2.89578	0	0.04597
High	TRUE	Homo sapiens	Q5R7D3	Mascot (A2)	0.885794	0.000494784	a-c	21.9878	2897	A_IyII_1-3.raw	16/124	29.28	40	33	0.122104		0.001533	0.03438
LDKAQIHDIVLVGGSTR	High	Homo sapiens	Q5R7D3		0.04878		a-c
Confidence	Checked	Homo sapiens	Master Protein Accessions	Identifying Node	DeltaM [ppm]	Deltam/z [Da]	a-c	RT [min]	First Scan	Spectrum File	Ions Matched	Ions Score	Identity Strict	Identity Relaxed	Expectation Value	XCorr	Percolator q-Value	Percolator PEP
High	TRUE	Homo sapiens	Q5R7D3	Sequest HT (A4)	1.45495	0.000662735	a-c	29.1996	4363	A_IyII_1-3.raw	0/0					1.68427	0	0.04878
High	TRUE	Homo sapiens	Q5R7D3	Mascot (A2)	1.45495	0.000662735	a-c	29.1996	4363	A_IyII_1-3.raw	5/184	5.3	42	35	53.2103		0.004235	0.1769
BPI fold-containing family B member 1 OS=Homo sapiens GN=BPIFB1 PE=1 SV=1	Q8TDL5	Homo sapiens	52.408	6.61157	244.638	3	a-c
Sequence	Confidence	Homo sapiens	Master Protein Accessions	Modifications	Percolator PEP Sequest HT		a-c
VINEPTAAAMAYGLHK	High	Homo sapiens	O35162		0.2843		a-c
Confidence	Checked	Homo sapiens	Master Protein Accessions	Identifying Node	DeltaM [ppm]	Deltam/z [Da]	a-c	RT [min]	First Scan	Spectrum File	Ions Matched	Ions Score	Identity Strict	Identity Relaxed	Expectation Value	XCorr	Percolator q-Value	Percolator PEP
High	TRUE	Homo sapiens	O35162	Mascot (A2)	0.978655	0.000549961	a-c	29.9443	4515	A_IyII_1-3.raw	7/172	31.04	46	39	0.326939		0.004235	0.1242
Sequence	Confidence	Homo sapiens	Master Protein Accessions	Modifications	Percolator PEP Sequest HT		a-c
ARFEELNADLFR	High	Homo sapiens	P19120; P11147		0.04		a-c
Confidence	Checked	Homo sapiens	Master Protein Accessions	Identifying Node	DeltaM [ppm]	Deltam/z [Da]	a-c	RT [min]	First Scan	Spectrum File	Ions Matched	Ions Score	Identity Strict	Identity Relaxed	Expectation Value	XCorr	Percolator q-Value	Percolator PEP
High	TRUE	Homo sapiens	P19120; P11147	Sequest HT (A4)	0.188148	9.28672e-05	a-c	34.111	5386	A_IyII_1-3.raw	0/0					3.34542	0	0.04
High	TRUE	Homo sapiens	P19120; P11147	Mascot (A2)	0.188148	9.28672e-05	a-c	34.111	5386	A_IyII_1-3.raw	12/128	41.82	45	38	0.0260992		0	0.008935
QTQTFTTYSDNQPGVLIQVYEGER	High	Homo sapiens	P19120; P11147		0.000821		a-c
Confidence	Checked	Homo sapiens	Master Protein Accessions	Identifying Node	DeltaM [ppm]	Deltam/z [Da]	a-c	RT [min]	First Scan	Spectrum File	Ions Matched	Ions Score	Identity Strict	Identity Relaxed	Expectation Value	XCorr	Percolator q-Value	Percolator PEP
High	TRUE	Homo sapiens	P19120; P11147	Mascot (A2)	1.02585	0.000948679	a-c	40.9527	6806	A_IyII_1-3.raw	14/276	45.22	46	39	0.0132267		0	0.0009302
High	TRUE	Homo sapiens	P19120; P11147	Sequest HT (A4)	1.02585	0.000948679	a-c	40.9527	6806	A_IyII_1-3.raw	0/0					6.75778	0	0.000821
IINEPTAAAIAYGLDK	High	Homo sapiens	P19120; P11021; P11147		0.01479		a-c
Confidence	Checked	Homo sapiens	Master Protein Accessions	Identifying Node	DeltaM [ppm]	Deltam/z [Da]	a-c	RT [min]	First Scan	Spectrum File	Ions Matched	Ions Score	Identity Strict	Identity Relaxed	Expectation Value	XCorr	Percolator q-Value	Percolator PEP
High	TRUE	Homo sapiens	P19120; P11021; P11147	Sequest HT (A4)	0.860234	0.000475966	a-c	37.1819	6025	A_IyII_1-3.raw	0/0					3.93713	0	0.01479
High	TRUE	Homo sapiens	P19120; P11021; P11147	Mascot (A2)	0.860234	0.000475966	a-c	37.1819	6025	A_IyII_1-3.raw	10/172	34.05	46	39	0.168085		0.002414	0.05941
TTPSYVAFTDTER	High	Homo sapiens	P19120; P11147; Q5R7D3		0.02333		a-c
Confidence	Checked	Homo sapiens	Master Protein Accessions	Identifying Node	DeltaM [ppm]	Deltam/z [Da]	a-c	RT [min]	First Scan	Spectrum File	Ions Matched	Ions Score	Identity Strict	Identity Relaxed	Expectation Value	XCorr	Percolator q-Value	Percolator PEP
High	TRUE	Homo sapiens	P19120; P11147; Q5R7D3	Sequest HT (A4)	0.872667	0.000649134	a-c	30.0817	4543	A_IyII_1-3.raw	0/0					3.42735	0	0.02333
High	TRUE	Homo sapiens	P19120; P11147; Q5R7D3	Mascot (A2)	0.872667	0.000649134	a-c	30.0817	4543	A_IyII_1-3.raw	10/96	55.09	43	36	0.000733004		0	0.002832
TFFPEEISSMVLTK	High	Homo sapiens	P11147		0.03331		a-c
Confidence	Checked	Homo sapiens	Master Protein Accessions	Identifying Node	DeltaM [ppm]	Deltam/z [Da]	a-c	RT [min]	First Scan	Spectrum File	Ions Matched	Ions Score	Identity Strict	Identity Relaxed	Expectation Value	XCorr	Percolator q-Value	Percolator PEP
High	TRUE	Homo sapiens	P11147	Sequest HT (A4)	1.04956	0.000854771	a-c	49.3922	8519	A_IyII_1-3.raw	0/0					2.76172	0	0.03331
High	TRUE	Homo sapiens	P11147	Mascot (A2)	1.04956	0.000854771	a-c	49.3922	8519	A_IyII_1-3.raw	12/104	39.55	46	39	0.0464689		0.001533	0.02909
Sequence	Confidence	Homo sapiens	Master Protein Accessions	Modifications	Percolator PEP Sequest HT		a-c
TVTNAVVTVPAYFNDSQR	High	Homo sapiens	P19120		0.005486		a-c
Confidence	Checked	Homo sapiens	Master Protein Accessions	Identifying Node	DeltaM [ppm]	Deltam/z [Da]	a-c	RT [min]	First Scan	Spectrum File	Ions Matched	Ions Score	Identity Strict	Identity Relaxed	Expectation Value	XCorr	Percolator q-Value	Percolator PEP
High	TRUE	Homo sapiens	P19120	Sequest HT (A4)	0.8601	0.000568239	a-c	36.3796	5858	A_IyII_1-3.raw	0/0					3.61001	0	0.005486
High	TRUE	Homo sapiens	P19120	Mascot (A2)	0.8601	0.000568239	a-c	36.3796	5858	A_IyII_1-3.raw	16/192	24.94	46	39	1.45933		0	0.009182
ARFEELNADLFR	High	Homo sapiens	P19120; P11147		0.04		a-c
Confidence	Checked	Homo sapiens	Master Protein Accessions	Identifying Node	DeltaM [ppm]	Deltam/z [Da]	a-c	RT [min]	First Scan	Spectrum File	Ions Matched	Ions Score	Identity Strict	Identity Relaxed	Expectation Value	XCorr	Percolator q-Value	Percolator PEP
High	TRUE	Homo sapiens	P19120; P11147	Sequest HT (A4)	0.188148	9.28672e-05	a-c	34.111	5386	A_IyII_1-3.raw	0/0					3.34542	0	0.04
High	TRUE	Homo sapiens	P19120; P11147	Mascot (A2)	0.188148	9.28672e-05	a-c	34.111	5386	A_IyII_1-3.raw	12/128	41.82	45	38	0.0260992		0	0.008935
QTQTFTTYSDNQPGVLIQVYEGER	High	Homo sapiens	P19120; P11147		0.000821		a-c
Confidence	Checked	Homo sapiens	Master Protein Accessions	Identifying Node	DeltaM [ppm]	Deltam/z [Da]	a-c	RT [min]	First Scan	Spectrum File	Ions Matched	Ions Score	Identity Strict	Identity Relaxed	Expectation Value	XCorr	Percolator q-Value	Percolator PEP
High	TRUE	Homo sapiens	P19120; P11147	Mascot (A2)	1.02585	0.000948679	a-c	40.9527	6806	A_IyII_1-3.raw	14/276	45.22	46	39	0.0132267		0	0.0009302
High	TRUE	Homo sapiens	P19120; P11147	Sequest HT (A4)	1.02585	0.000948679	a-c	40.9527	6806	A_IyII_1-3.raw	0/0					6.75778	0	0.000821
IINEPTAAAIAYGLDK	High	Homo sapiens	P19120; P11021; P11147		0.01479		a-c
Confidence	Checked	Homo sapiens	Master Protein Accessions	Identifying Node	DeltaM [ppm]	Deltam/z [Da]	a-c	RT [min]	First Scan	Spectrum File	Ions Matched	Ions Score	Identity Strict	Identity Relaxed	Expectation Value	XCorr	Percolator q-Value	Percolator PEP
High	TRUE	Homo sapiens	P19120; P11021; P11147	Sequest HT (A4)	0.860234	0.000475966	a-c	37.1819	6025	A_IyII_1-3.raw	0/0					3.93713	0	0.01479
High	TRUE	Homo sapiens	P19120; P11021; P11147	Mascot (A2)	0.860234	0.000475966	a-c	37.1819	6025	A_IyII_1-3.raw	10/172	34.05	46	39	0.168085		0.002414	0.05941
GPAVGIDLGTTYSCVGVFQHGK	High	Homo sapiens	P19120	1xCarbamidomethyl [C14]	0.0002847		a-c
Confidence	Checked	Homo sapiens	Master Protein Accessions	Identifying Node	DeltaM [ppm]	Deltam/z [Da]	a-c	RT [min]	First Scan	Spectrum File	Ions Matched	Ions Score	Identity Strict	Identity Relaxed	Expectation Value	XCorr	Percolator q-Value	Percolator PEP
High	TRUE	Homo sapiens	P19120	Sequest HT (A4)	0.921366	0.000695053	a-c	37.1008	6008	A_IyII_1-3.raw	0/0					4.26038	0	0.0002847
High	TRUE	Homo sapiens	P19120	Mascot (A2)	0.921366	0.000695053	a-c	37.1008	6008	A_IyII_1-3.raw	17/180	32.63	46	39	0.263383		0	0.0007836
SINPDEAVAYGAAVQAAILSGDK	High	Homo sapiens	P19120		0.001598		a-c
Confidence	Checked	Homo sapiens	Master Protein Accessions	Identifying Node	DeltaM [ppm]	Deltam/z [Da]	a-c	RT [min]	First Scan	Spectrum File	Ions Matched	Ions Score	Identity Strict	Identity Relaxed	Expectation Value	XCorr	Percolator q-Value	Percolator PEP
High	TRUE	Homo sapiens	P19120	Mascot (A2)	0.967326	0.00109315	a-c	63.0564	11260	A_IyII_1-3.raw	10/256	62.98	46	39	0.000249812		0	0.0002735
High	TRUE	Homo sapiens	P19120	Sequest HT (A4)	0.967326	0.00109315	a-c	63.0564	11260	A_IyII_1-3.raw	0/0					5.08165	0	0.001598
TTPSYVAFTDTER	High	Homo sapiens	P19120; P11147; Q5R7D3		0.02333		a-c
Confidence	Checked	Homo sapiens	Master Protein Accessions	Identifying Node	DeltaM [ppm]	Deltam/z [Da]	a-c	RT [min]	First Scan	Spectrum File	Ions Matched	Ions Score	Identity Strict	Identity Relaxed	Expectation Value	XCorr	Percolator q-Value	Percolator PEP
High	TRUE	Homo sapiens	P19120; P11147; Q5R7D3	Sequest HT (A4)	0.872667	0.000649134	a-c	30.0817	4543	A_IyII_1-3.raw	0/0					3.42735	0	0.02333
High	TRUE	Homo sapiens	P19120; P11147; Q5R7D3	Mascot (A2)	0.872667	0.000649134	a-c	30.0817	4543	A_IyII_1-3.raw	10/96	55.09	43	36	0.000733004		0	0.002832
NQVAMNPTNTVFDAKR	High	Homo sapiens	P19120		0.07271		a-c
Confidence	Checked	Homo sapiens	Master Protein Accessions	Identifying Node	DeltaM [ppm]	Deltam/z [Da]	a-c	RT [min]	First Scan	Spectrum File	Ions Matched	Ions Score	Identity Strict	Identity Relaxed	Expectation Value	XCorr	Percolator q-Value	Percolator PEP
High	TRUE	Homo sapiens	P19120	Sequest HT (A4)	1.74769	0.00105205	a-c	26.5972	3829	A_IyII_1-3.raw	0/0					3.42867	0	0.07271
High	TRUE	Homo sapiens	P19120	Mascot (A2)	1.74769	0.00105205	a-c	26.5972	3829	A_IyII_1-3.raw	6/180	29.7	46	39	0.489791		0.003589	0.09844
NQVAMNPTNTVFDAK	High	Homo sapiens	P19120	1xOxidation [M5]	0.4209		a-c
Confidence	Checked	Homo sapiens	Master Protein Accessions	Identifying Node	DeltaM [ppm]	Deltam/z [Da]	a-c	RT [min]	First Scan	Spectrum File	Ions Matched	Ions Score	Identity Strict	Identity Relaxed	Expectation Value	XCorr	Percolator q-Value	Percolator PEP
High	TRUE	Homo sapiens	P19120	Mascot (A2)	0.800422	0.000666667	a-c	26.49	3807	A_IyII_1-3.raw	6/168	22.6	45	38	1.84151		0.004235	0.1324
Ezrin OS=Homo sapiens GN=EZR PE=1 SV=4	P15311	Homo sapiens	69.37	10.4096	69.7242	3	a-c
Sequence	Confidence	Homo sapiens	Master Protein Accessions	Modifications	Percolator PEP Sequest HT		a-c
YHTSQSGDEMTSLSEYVSR	High	Homo sapiens	Q04619		0.01081		a-c
Confidence	Checked	Homo sapiens	Master Protein Accessions	Identifying Node	DeltaM [ppm]	Deltam/z [Da]	a-c	RT [min]	First Scan	Spectrum File	Ions Matched	Ions Score	Identity Strict	Identity Relaxed	Expectation Value	XCorr	Percolator q-Value	Percolator PEP
High	TRUE	Homo sapiens	Q04619	Sequest HT (A4)	2.41647	0.00175351	a-c	30.6414	4660	A_IyII_1-3.raw	0/0					2.90311	0	0.01081
High	TRUE	Homo sapiens	Q04619	Mascot (A2)	2.41647	0.00175351	a-c	30.6414	4660	A_IyII_1-3.raw	6/200	21.44	40	33	0.871402		0	0.02632
ELISNASDAIDK	High	Homo sapiens	Q04619; P41148		0.1936		a-c
Confidence	Checked	Homo sapiens	Master Protein Accessions	Identifying Node	DeltaM [ppm]	Deltam/z [Da]	a-c	RT [min]	First Scan	Spectrum File	Ions Matched	Ions Score	Identity Strict	Identity Relaxed	Expectation Value	XCorr	Percolator q-Value	Percolator PEP
High	TRUE	Homo sapiens	Q04619; P41148	Sequest HT (A4)	1.38772	0.000885119	a-c	27.9989	4115	A_IyII_1-3.raw	0/0					2.30382	0.003158	0.1936
High	TRUE	Homo sapiens	Q04619; P41148	Mascot (A2)	1.38772	0.000885119	a-c	27.9989	4115	A_IyII_1-3.raw	5/116	24.1	45	38	1.51961		0.007196	0.2041
Sequence	Confidence	Homo sapiens	Master Protein Accessions	Modifications	Percolator PEP Sequest HT		a-c
KVADALTNAVAHVDDMPNALSALSDLHAHK	High	Homo sapiens	P67817	1xOxidation [M16]	0.0378		a-c
Confidence	Checked	Homo sapiens	Master Protein Accessions	Identifying Node	DeltaM [ppm]	Deltam/z [Da]	a-c	RT [min]	First Scan	Spectrum File	Ions Matched	Ions Score	Identity Strict	Identity Relaxed	Expectation Value	XCorr	Percolator q-Value	Percolator PEP
High	TRUE	Homo sapiens	P67817	Sequest HT (A4)	1.17615	0.000738758	a-c	36.2086	5822	A_IyII_1-3.raw	0/0					4.6044	0	0.0378
High	TRUE	Homo sapiens	P67817	Mascot (A2)	1.17615	0.000738758	a-c	36.2086	5822	A_IyII_1-3.raw	31/348	28.44	46	39	0.694969		0	0.02282
KVADALTNAVAHVDDMPNALSALSDLHAHK	High	Homo sapiens	P67817		0.002618		a-c
Confidence	Checked	Homo sapiens	Master Protein Accessions	Identifying Node	DeltaM [ppm]	Deltam/z [Da]	a-c	RT [min]	First Scan	Spectrum File	Ions Matched	Ions Score	Identity Strict	Identity Relaxed	Expectation Value	XCorr	Percolator q-Value	Percolator PEP
High	TRUE	Homo sapiens	P67817	Sequest HT (A4)	0.121236	7.57623e-05	a-c	40.3563	6683	A_IyII_1-3.raw	0/0					4.83143	0	0.002618
High	TRUE	Homo sapiens	P67817	Mascot (A2)	0.121236	7.57623e-05	a-c	40.3563	6683	A_IyII_1-3.raw	31/348	52.97	47	40	0.00255258		0	0.0007941
VADALTNAVAHVDDMPNALSALSDLHAHK	High	Homo sapiens	P67817	1xOxidation [M15]	0.01705		a-c
Confidence	Checked	Homo sapiens	Master Protein Accessions	Identifying Node	DeltaM [ppm]	Deltam/z [Da]	a-c	RT [min]	First Scan	Spectrum File	Ions Matched	Ions Score	Identity Strict	Identity Relaxed	Expectation Value	XCorr	Percolator q-Value	Percolator PEP
High	TRUE	Homo sapiens	P67817	Sequest HT (A4)	1.48698	0.000895901	a-c	37.579	6109	A_IyII_1-3.raw	0/0					4.12326	0	0.01705
VADALTNAVAHVDDMPNALSALSDLHAHK	High	Homo sapiens	P67817		0.0004103		a-c
Confidence	Checked	Homo sapiens	Master Protein Accessions	Identifying Node	DeltaM [ppm]	Deltam/z [Da]	a-c	RT [min]	First Scan	Spectrum File	Ions Matched	Ions Score	Identity Strict	Identity Relaxed	Expectation Value	XCorr	Percolator q-Value	Percolator PEP
High	TRUE	Homo sapiens	P67817	Sequest HT (A4)	0.800495	0.000599669	a-c	42.0118	7021	A_IyII_1-3.raw	0/0					7.24031	0	0.0004103
High	TRUE	Homo sapiens	P67817	Mascot (A2)	0.800495	0.000599669	a-c	42.0118	7021	A_IyII_1-3.raw	8/312	44.55	47	40	0.0186881		0	7.727e-05
High	TRUE	Homo sapiens	P67817	Sequest HT (A4)	1.30523	0.000782221	a-c	41.9723	7013	A_IyII_1-3.raw	0/0					4.89681	0	0.03599
High	TRUE	Homo sapiens	P67817	Mascot (A2)	1.30523	0.000782221	a-c	41.9723	7013	A_IyII_1-3.raw	11/312	35.02	47	40	0.169632		0	0.01961
High	TRUE	Homo sapiens	P67817	Mascot (A2)	-1.70039	-0.0016984	a-c	42.032	7025	A_IyII_1-3.raw	26/312	53.52	47	40	0.00237011		0	7.423e-05
High	TRUE	Homo sapiens	P67817	Sequest HT (A4)	-1.70039	-0.0016984	a-c	42.032	7025	A_IyII_1-3.raw	0/0					7.04477	0	0.0004385
TYFPHFDLSHGSAQVK	High	Homo sapiens	P67817		0.03476		a-c
Confidence	Checked	Homo sapiens	Master Protein Accessions	Identifying Node	DeltaM [ppm]	Deltam/z [Da]	a-c	RT [min]	First Scan	Spectrum File	Ions Matched	Ions Score	Identity Strict	Identity Relaxed	Expectation Value	XCorr	Percolator q-Value	Percolator PEP
High	TRUE	Homo sapiens	P67817	Sequest HT (A4)	0.710486	0.000434318	a-c	30.4303	4616	A_IyII_1-3.raw	0/0					3.9094	0	0.03476
High	TRUE	Homo sapiens	P67817	Mascot (A2)	0.710486	0.000434318	a-c	30.4303	4616	A_IyII_1-3.raw	9/128	16.88	46	39	8.61591		0.002414	0.09046
VGGHAGDYGAEALER	High	Homo sapiens	P67817		0.08419		a-c
Confidence	Checked	Homo sapiens	Master Protein Accessions	Identifying Node	DeltaM [ppm]	Deltam/z [Da]	a-c	RT [min]	First Scan	Spectrum File	Ions Matched	Ions Score	Identity Strict	Identity Relaxed	Expectation Value	XCorr	Percolator q-Value	Percolator PEP
High	TRUE	Homo sapiens	P67817	Sequest HT (A4)	0.149742	7.49558e-05	a-c	22.121	2923	A_IyII_1-3.raw	0/0					3.13404	0	0.08419
High	TRUE	Homo sapiens	P67817	Mascot (A2)	0.280628	0.00021071	a-c	22.1016	2919	A_IyII_1-3.raw	8/112	19.35	43	36	2.44601		0.009211	0.2085
Histidine-rich glycoprotein OS=Homo sapiens GN=HRG PE=1 SV=1	P04196	Homo sapiens	59.541	6.66667	148.67	3	a-c
Sequence	Confidence	Homo sapiens	Master Protein Accessions	Modifications	Percolator PEP Sequest HT		a-c
GTFAQLSELHCDKLHVDPENFR	High	Homo sapiens	P02036; Q6WN29	1xCarbamidomethyl [C11]	0.01378		a-c
Confidence	Checked	Homo sapiens	Master Protein Accessions	Identifying Node	DeltaM [ppm]	Deltam/z [Da]	a-c	RT [min]	First Scan	Spectrum File	Ions Matched	Ions Score	Identity Strict	Identity Relaxed	Expectation Value	XCorr	Percolator q-Value	Percolator PEP
High	TRUE	Homo sapiens	P02036; Q6WN29	Mascot (A2)	0.902877	0.000589861	a-c	32.9739	5150	A_IyII_1-3.raw	19/236	30.32	46	39	0.400988		0	0.01035
High	TRUE	Homo sapiens	P02036; Q6WN29	Sequest HT (A4)	0.902877	0.000589861	a-c	32.9739	5150	A_IyII_1-3.raw	0/0					4.23409	0	0.01378
High	TRUE	Homo sapiens	P02036; Q6WN29	Sequest HT (A4)	2.69615	0.00140914	a-c	32.9408	5143	A_IyII_1-3.raw	0/0					3.38767	0	0.0264
High	TRUE	Homo sapiens	P02036; Q6WN29	Mascot (A2)	2.69615	0.00140914	a-c	32.9408	5143	A_IyII_1-3.raw	18/236	15.79	46	39	11.733		0.002414	0.06114
VLGAFSDGLAHLDNLK	High	Homo sapiens	P02036; Q6WN29		0.01537		a-c
Confidence	Checked	Homo sapiens	Master Protein Accessions	Identifying Node	DeltaM [ppm]	Deltam/z [Da]	a-c	RT [min]	First Scan	Spectrum File	Ions Matched	Ions Score	Identity Strict	Identity Relaxed	Expectation Value	XCorr	Percolator q-Value	Percolator PEP
High	TRUE	Homo sapiens	P02036; Q6WN29	Mascot (A2)	1.05109	0.000585067	a-c	37.7564	6145	A_IyII_1-3.raw	9/128	57.54	45	38	0.000598719		0	0.001027
High	TRUE	Homo sapiens	P02036; Q6WN29	Sequest HT (A4)	1.05109	0.000585067	a-c	37.7564	6145	A_IyII_1-3.raw	0/0					5.26014	0	0.01537
VNVDEVGGEALGR	High	Homo sapiens	Q6WN29		0.06781		a-c
Confidence	Checked	Homo sapiens	Master Protein Accessions	Identifying Node	DeltaM [ppm]	Deltam/z [Da]	a-c	RT [min]	First Scan	Spectrum File	Ions Matched	Ions Score	Identity Strict	Identity Relaxed	Expectation Value	XCorr	Percolator q-Value	Percolator PEP
High	TRUE	Homo sapiens	Q6WN29	Sequest HT (A4)	0.667883	0.000439021	a-c	28.1857	4153	A_IyII_1-3.raw	0/0					4.15891	0	0.06781
High	TRUE	Homo sapiens	Q6WN29	Mascot (A2)	0.667883	0.000439021	a-c	28.1857	4153	A_IyII_1-3.raw	8/140	58.71	44	37	0.000388012		0.001533	0.03228
KVLGAFSDGLAHLDNLK	High	Homo sapiens	P02036; Q6WN29		0.02934		a-c
Confidence	Checked	Homo sapiens	Master Protein Accessions	Identifying Node	DeltaM [ppm]	Deltam/z [Da]	a-c	RT [min]	First Scan	Spectrum File	Ions Matched	Ions Score	Identity Strict	Identity Relaxed	Expectation Value	XCorr	Percolator q-Value	Percolator PEP
High	TRUE	Homo sapiens	P02036; Q6WN29	Sequest HT (A4)	0.667515	0.000300046	a-c	33.9882	5360	A_IyII_1-3.raw	0/0					3.66611	0	0.02934
High	TRUE	Homo sapiens	P02036; Q6WN29	Mascot (A2)	0.667515	0.000300046	a-c	33.9882	5360	A_IyII_1-3.raw	15/192	20.18	44	37	2.89739		0.001533	0.02799
LLGNVLVCVLAQHFGK	High	Homo sapiens	Q6WN29	1xCarbamidomethyl [C8]	0.2244		a-c
Confidence	Checked	Homo sapiens	Master Protein Accessions	Identifying Node	DeltaM [ppm]	Deltam/z [Da]	a-c	RT [min]	First Scan	Spectrum File	Ions Matched	Ions Score	Identity Strict	Identity Relaxed	Expectation Value	XCorr	Percolator q-Value	Percolator PEP
High	TRUE	Homo sapiens	Q6WN29	Mascot (A2)	1.47705	0.000870469	a-c	59.5063	10544	A_IyII_1-3.raw	9/168	13.91	42	35	7.53546		0.004235	0.1163
High	TRUE	Homo sapiens	Q6WN29	Sequest HT (A4)	1.47705	0.000870469	a-c	59.5063	10544	A_IyII_1-3.raw	0/0					2.46554	0.008188	0.2244
Keratin, type II cytoskeletal 78 OS=Homo sapiens GN=KRT78 PE=2 SV=2	Q8N1N4	Homo sapiens	56.83	7.30769	63.85	3	a-c
Sequence	Confidence	Homo sapiens	Master Protein Accessions	Modifications	Percolator PEP Sequest HT		a-c
GTFAQLSELHCDKLHVDPENFR	High	Homo sapiens	P02036; Q6WN29	1xCarbamidomethyl [C11]	0.01378		a-c
Confidence	Checked	Homo sapiens	Master Protein Accessions	Identifying Node	DeltaM [ppm]	Deltam/z [Da]	a-c	RT [min]	First Scan	Spectrum File	Ions Matched	Ions Score	Identity Strict	Identity Relaxed	Expectation Value	XCorr	Percolator q-Value	Percolator PEP
High	TRUE	Homo sapiens	P02036; Q6WN29	Mascot (A2)	0.902877	0.000589861	a-c	32.9739	5150	A_IyII_1-3.raw	19/236	30.32	46	39	0.400988		0	0.01035
High	TRUE	Homo sapiens	P02036; Q6WN29	Sequest HT (A4)	0.902877	0.000589861	a-c	32.9739	5150	A_IyII_1-3.raw	0/0					4.23409	0	0.01378
High	TRUE	Homo sapiens	P02036; Q6WN29	Sequest HT (A4)	2.69615	0.00140914	a-c	32.9408	5143	A_IyII_1-3.raw	0/0					3.38767	0	0.0264
High	TRUE	Homo sapiens	P02036; Q6WN29	Mascot (A2)	2.69615	0.00140914	a-c	32.9408	5143	A_IyII_1-3.raw	18/236	15.79	46	39	11.733		0.002414	0.06114
VLGAFSDGLAHLDNLK	High	Homo sapiens	P02036; Q6WN29		0.01537		a-c
Confidence	Checked	Homo sapiens	Master Protein Accessions	Identifying Node	DeltaM [ppm]	Deltam/z [Da]	a-c	RT [min]	First Scan	Spectrum File	Ions Matched	Ions Score	Identity Strict	Identity Relaxed	Expectation Value	XCorr	Percolator q-Value	Percolator PEP
High	TRUE	Homo sapiens	P02036; Q6WN29	Mascot (A2)	1.05109	0.000585067	a-c	37.7564	6145	A_IyII_1-3.raw	9/128	57.54	45	38	0.000598719		0	0.001027
High	TRUE	Homo sapiens	P02036; Q6WN29	Sequest HT (A4)	1.05109	0.000585067	a-c	37.7564	6145	A_IyII_1-3.raw	0/0					5.26014	0	0.01537
FFESFGDLSTPDAVMNNPK	High	Homo sapiens	P02036		0.01569		a-c
Confidence	Checked	Homo sapiens	Master Protein Accessions	Identifying Node	DeltaM [ppm]	Deltam/z [Da]	a-c	RT [min]	First Scan	Spectrum File	Ions Matched	Ions Score	Identity Strict	Identity Relaxed	Expectation Value	XCorr	Percolator q-Value	Percolator PEP
High	TRUE	Homo sapiens	P02036	Sequest HT (A4)	-0.361129	-0.000254713	a-c	42.783	7179	A_IyII_1-3.raw	0/0					4.51946	0	0.01569
High	TRUE	Homo sapiens	P02036	Mascot (A2)	-0.361129	-0.000254713	a-c	42.783	7179	A_IyII_1-3.raw	13/156	22.33	43	36	1.2649		0.002414	0.05897
KVLGAFSDGLAHLDNLK	High	Homo sapiens	P02036; Q6WN29		0.02934		a-c
Confidence	Checked	Homo sapiens	Master Protein Accessions	Identifying Node	DeltaM [ppm]	Deltam/z [Da]	a-c	RT [min]	First Scan	Spectrum File	Ions Matched	Ions Score	Identity Strict	Identity Relaxed	Expectation Value	XCorr	Percolator q-Value	Percolator PEP
High	TRUE	Homo sapiens	P02036; Q6WN29	Sequest HT (A4)	0.667515	0.000300046	a-c	33.9882	5360	A_IyII_1-3.raw	0/0					3.66611	0	0.02934
High	TRUE	Homo sapiens	P02036; Q6WN29	Mascot (A2)	0.667515	0.000300046	a-c	33.9882	5360	A_IyII_1-3.raw	15/192	20.18	44	37	2.89739		0.001533	0.02799
Sequence	Confidence	Homo sapiens	Master Protein Accessions	Modifications	Percolator PEP Sequest HT		a-c
HQGTITVNEEGTQAAAVTTVGFMPLSTQVR	High	Homo sapiens	P47776		0.178		a-c
Confidence	Checked	Homo sapiens	Master Protein Accessions	Identifying Node	DeltaM [ppm]	Deltam/z [Da]	a-c	RT [min]	First Scan	Spectrum File	Ions Matched	Ions Score	Identity Strict	Identity Relaxed	Expectation Value	XCorr	Percolator q-Value	Percolator PEP
High	TRUE	Homo sapiens	P47776	Sequest HT (A4)	1.46482	0.00153492	a-c	38.5197	6302	A_IyII_1-3.raw	0/0					2.20582	0.002128	0.178
Sequence	Confidence	Homo sapiens	Master Protein Accessions	Modifications	Percolator PEP Sequest HT		a-c
ADLFYDVEALDLESPK	High	Homo sapiens	P04196		0.001556		a-c
Confidence	Checked	Homo sapiens	Master Protein Accessions	Identifying Node	DeltaM [ppm]	Deltam/z [Da]	a-c	RT [min]	First Scan	Spectrum File	Ions Matched	Ions Score	Identity Strict	Identity Relaxed	Expectation Value	XCorr	Percolator q-Value	Percolator PEP
High	TRUE	Homo sapiens	P04196	Sequest HT (A4)	1.13581	0.00103636	a-c	56.1898	9890	A_IyII_1-3.raw	0/0					3.84337	0	0.01431
High	TRUE	Homo sapiens	P04196	Mascot (A2)	1.13581	0.00103636	a-c	56.1898	9890	A_IyII_1-3.raw	8/120	58.62	46	39	0.00057222		0	0.003175
High	TRUE	Homo sapiens	P04196	Sequest HT (A4)	1.12844	0.000686425	a-c	55.09	9672	A_IyII_1-3.raw	0/0					4.29876	0	0.001556
High	TRUE	Homo sapiens	P04196	Mascot (A2)	1.12844	0.000686425	a-c	55.09	9672	A_IyII_1-3.raw	11/120	67.82	46	39	6.87959e-05		0	0.0002498
High	TRUE	Homo sapiens	P04196	Sequest HT (A4)	0.199321	0.000181869	a-c	54.683	9590	A_IyII_1-3.raw	0/0					4.29546	0	0.004823
High	TRUE	Homo sapiens	P04196	Mascot (A2)	0.199321	0.000181869	a-c	54.683	9590	A_IyII_1-3.raw	8/120	62.78	46	39	0.000219407		0	0.0004036
DGYLFQLLR	High	Homo sapiens	P04196		0.1617		a-c
Confidence	Checked	Homo sapiens	Master Protein Accessions	Identifying Node	DeltaM [ppm]	Deltam/z [Da]	a-c	RT [min]	First Scan	Spectrum File	Ions Matched	Ions Score	Identity Strict	Identity Relaxed	Expectation Value	XCorr	Percolator q-Value	Percolator PEP
High	TRUE	Homo sapiens	P04196	Sequest HT (A4)	-0.398246	-0.000223936	a-c	51.7149	8989	A_IyII_1-3.raw	0/0					2.08471	0	0.09854
High	TRUE	Homo sapiens	P04196	Sequest HT (A4)	0.470111	0.000264346	a-c	50.1594	8675	A_IyII_1-3.raw	0/0					2.98511	0.002128	0.1617
High	TRUE	Homo sapiens	P04196	Mascot (A2)	-0.398246	-0.000223936	a-c	51.7149	8989	A_IyII_1-3.raw	9/76	33.96	43	36	0.0839542		0.002414	0.04368
High	TRUE	Homo sapiens	P04196	Mascot (A2)	0.470111	0.000264346	a-c	50.1594	8675	A_IyII_1-3.raw	13/76	54.7	43	36	0.000746982		0.002414	0.06011
HPNVFGFCR	High	Homo sapiens	P04196	1xCarbamidomethyl [C8]	0.04383		a-c
Confidence	Checked	Homo sapiens	Master Protein Accessions	Identifying Node	DeltaM [ppm]	Deltam/z [Da]	a-c	RT [min]	First Scan	Spectrum File	Ions Matched	Ions Score	Identity Strict	Identity Relaxed	Expectation Value	XCorr	Percolator q-Value	Percolator PEP
High	TRUE	Homo sapiens	P04196	Sequest HT (A4)	-1.09595	-0.000414096	a-c	25.9821	3705	A_IyII_1-3.raw	0/0					1.28889	0	0.04383
RDGYLFQLLR	High	Homo sapiens	P04196		0.2781		a-c
Confidence	Checked	Homo sapiens	Master Protein Accessions	Identifying Node	DeltaM [ppm]	Deltam/z [Da]	a-c	RT [min]	First Scan	Spectrum File	Ions Matched	Ions Score	Identity Strict	Identity Relaxed	Expectation Value	XCorr	Percolator q-Value	Percolator PEP
High	TRUE	Homo sapiens	P04196	Mascot (A2)	0.754881	0.000322262	a-c	37.1537	6019	A_IyII_1-3.raw	8/108	27.01	42	35	0.380318		0.002414	0.08737
Sequence	Confidence	Homo sapiens	Master Protein Accessions	Modifications	Percolator PEP Sequest HT		a-c
AANSLEAFIFETQDK	High	Homo sapiens	Q60432		0.002463		a-c
Confidence	Checked	Homo sapiens	Master Protein Accessions	Identifying Node	DeltaM [ppm]	Deltam/z [Da]	a-c	RT [min]	First Scan	Spectrum File	Ions Matched	Ions Score	Identity Strict	Identity Relaxed	Expectation Value	XCorr	Percolator q-Value	Percolator PEP
High	TRUE	Homo sapiens	Q60432	Sequest HT (A4)	0.894433	0.000502022	a-c	43.1416	7253	A_IyII_1-3.raw	0/0					3.81333	0	0.002463
High	TRUE	Homo sapiens	Q60432	Mascot (A2)	0.894433	0.000502022	a-c	43.1416	7253	A_IyII_1-3.raw	7/160	35.99	45	38	0.0919833		0	0.002955
LYQPEYQEVSTEEQREEISGK	High	Homo sapiens	Q60432				a-c
Confidence	Checked	Homo sapiens	Master Protein Accessions	Identifying Node	DeltaM [ppm]	Deltam/z [Da]	a-c	RT [min]	First Scan	Spectrum File	Ions Matched	Ions Score	Identity Strict	Identity Relaxed	Expectation Value	XCorr	Percolator q-Value	Percolator PEP
High	TRUE	Homo sapiens	Q60432	Mascot (A2)	2.16206	0.00183212	a-c	28.142	4144	A_IyII_1-3.raw	6/232	14.67	45	38	13.3748		0.004235	0.1151
Protein ERGIC-53 OS=Homo sapiens GN=LMAN1 PE=1 SV=2	P49257	Homo sapiens	57.513	12.549	60.01	3	a-c
Sequence	Confidence		Master Protein Accessions	Modifications	Percolator PEP Sequest HT		a-c
WLQGSQELPR	High		P01876		0.009572		a-c
Confidence	Checked		Master Protein Accessions	Identifying Node	DeltaM [ppm]	Deltam/z [Da]	a-c	RT [min]	First Scan	Spectrum File	Ions Matched	Ions Score	Identity Strict	Identity Relaxed	Expectation Value	XCorr	Percolator q-Value	Percolator PEP
High	TRUE		P01876	Sequest HT (A4)	1.08586	0.000658915	a-c	27.8313	4081	A_IyII_1-3.raw	0/0					3.3198	0	0.009572
High	TRUE		P01876	Mascot (A2)	1.08586	0.000658915	a-c	27.8313	4081	A_IyII_1-3.raw	8/100	56.14	43	36	0.000490211		0	0.00456
GFSPKDVLVR	High		P01876		0.07088		a-c
Confidence	Checked		Master Protein Accessions	Identifying Node	DeltaM [ppm]	Deltam/z [Da]	a-c	RT [min]	First Scan	Spectrum File	Ions Matched	Ions Score	Identity Strict	Identity Relaxed	Expectation Value	XCorr	Percolator q-Value	Percolator PEP
High	TRUE		P01876	Sequest HT (A4)	0.965619	0.000539605	a-c	27.3166	3976	A_IyII_1-3.raw	0/0					2.6979	0	0.07088
High	TRUE		P01876	Mascot (A2)	0.965619	0.000539605	a-c	27.3166	3976	A_IyII_1-3.raw	8/92	50.42	44	37	0.00245293		0.001533	0.02864
Sequence	Confidence		Master Protein Accessions	Modifications	Percolator PEP Sequest HT		a-c
GLEWVSR	High		P19180		0.2408		a-c
Confidence	Checked		Master Protein Accessions	Identifying Node	DeltaM [ppm]	Deltam/z [Da]	a-c	RT [min]	First Scan	Spectrum File	Ions Matched	Ions Score	Identity Strict	Identity Relaxed	Expectation Value	XCorr	Percolator q-Value	Percolator PEP
High	TRUE		P19180	Mascot (A2)	0.933773	0.000395195	a-c	28.0524	4126	A_IyII_1-3.raw	5/48	30.02	45	38	0.370988		0.004235	0.1162
Sequence	Confidence		Master Protein Accessions	Modifications	Percolator PEP Sequest HT		a-c
SEDTALYYCAR	High		P01807	1xCarbamidomethyl [C9]	0.06775		a-c
Confidence	Checked		Master Protein Accessions	Identifying Node	DeltaM [ppm]	Deltam/z [Da]	a-c	RT [min]	First Scan	Spectrum File	Ions Matched	Ions Score	Identity Strict	Identity Relaxed	Expectation Value	XCorr	Percolator q-Value	Percolator PEP
High	TRUE		P01807	Sequest HT (A4)	0.359128	0.000242157	a-c	25.4136	3590	A_IyII_1-3.raw	0/0					2.70098	0	0.06775
High	TRUE		P01807	Mascot (A2)	0.359128	0.000242157	a-c	25.4136	3590	A_IyII_1-3.raw	7/80	20.71	38	31	0.620751		0.002414	0.0625
Sequence	Confidence		Master Protein Accessions	Modifications	Percolator PEP Sequest HT		a-c
SEDTAVYYCAR	High		P01743	1xCarbamidomethyl [C9]	0.07352		a-c
Confidence	Checked		Master Protein Accessions	Identifying Node	DeltaM [ppm]	Deltam/z [Da]	a-c	RT [min]	First Scan	Spectrum File	Ions Matched	Ions Score	Identity Strict	Identity Relaxed	Expectation Value	XCorr	Percolator q-Value	Percolator PEP
High	TRUE		P01743	Sequest HT (A4)	0.747549	0.000498828	a-c	23.317	3166	A_IyII_1-3.raw	0/0					3.38012	0	0.07352
High	TRUE		P01743	Mascot (A2)	0.747549	0.000498828	a-c	23.317	3166	A_IyII_1-3.raw	6/80	40.76	37	30	0.0051249		0	0.02237
Sulfhydryl oxidase 1 OS=Pongo abelii GN=QSOX1 PE=3 SV=2	H2N4I1	Pongo abelii	82.752	5.86667	111.773	3	a-c
Sequence	Confidence		Master Protein Accessions	Modifications	Percolator PEP Sequest HT		a-c
QVQLVQSGAEVK	High		P06326	1xDeamidated [Q]			a-c
Confidence	Checked		Master Protein Accessions	Identifying Node	DeltaM [ppm]	Deltam/z [Da]	a-c	RT [min]	First Scan	Spectrum File	Ions Matched	Ions Score	Identity Strict	Identity Relaxed	Expectation Value	XCorr	Percolator q-Value	Percolator PEP
High	TRUE		P06326	Mascot (A2)	0.52024	0.000334695	a-c	24.3806	3381	A_IyII_1-3.raw	9/132	52.43	46	39	0.00236906		0.003589	0.09841
High	TRUE		P06326	Mascot (A2)	0.52024	0.000334695	a-c	24.3806	3381	A_IyII_1-3.raw	9/132	50.01	46	39	0.00413597		0.004235	0.1041
Sequence	Confidence		Master Protein Accessions	Modifications	Percolator PEP Sequest HT		a-c
AEDTAVYYCAK	High		P01764	1xCarbamidomethyl [C9]	0.1285		a-c
Confidence	Checked		Master Protein Accessions	Identifying Node	DeltaM [ppm]	Deltam/z [Da]	a-c	RT [min]	First Scan	Spectrum File	Ions Matched	Ions Score	Identity Strict	Identity Relaxed	Expectation Value	XCorr	Percolator q-Value	Percolator PEP
High	TRUE		P01764	Sequest HT (A4)	-0.106163	-6.8505e-05	a-c	22.5668	3014	A_IyII_1-3.raw	0/0					2.31629	0.001107	0.1285
High	TRUE		P01764	Mascot (A2)	-0.106163	-6.8505e-05	a-c	22.5668	3014	A_IyII_1-3.raw	6/80	45.47	39	32	0.00251156		0.002414	0.05404
Sequence	Confidence		Master Protein Accessions	Modifications	Percolator PEP Sequest HT		a-c
EVQLVESGGGLVQPGGSLR	High		P01766		0.0008427		a-c
Confidence	Checked		Master Protein Accessions	Identifying Node	DeltaM [ppm]	Deltam/z [Da]	a-c	RT [min]	First Scan	Spectrum File	Ions Matched	Ions Score	Identity Strict	Identity Relaxed	Expectation Value	XCorr	Percolator q-Value	Percolator PEP
High	TRUE		P01766	Sequest HT (A4)	1.09718	0.00103245	a-c	34.567	5481	A_IyII_1-3.raw	0/0					4.40597	0	0.0004567
High	TRUE		P01766	Mascot (A2)	1.09718	0.00103245	a-c	34.567	5481	A_IyII_1-3.raw	26/208	37.6	45	38	0.0587464		0	0.0005119
High	TRUE		P01766	Sequest HT (A4)	0.863016	0.0005414	a-c	34.4371	5454	A_IyII_1-3.raw	0/0					5.10048	0	0.0008427
High	TRUE		P01766	Mascot (A2)	0.863016	0.0005414	a-c	34.4371	5454	A_IyII_1-3.raw	22/208	38.55	45	38	0.0484819		0	0.0003671
Sequence	Confidence		Master Protein Accessions	Modifications	Percolator PEP Sequest HT		a-c
EVQLVESGGGLVQPGESLK	High		P80419		0.1793		a-c
Confidence	Checked		Master Protein Accessions	Identifying Node	DeltaM [ppm]	Deltam/z [Da]	a-c	RT [min]	First Scan	Spectrum File	Ions Matched	Ions Score	Identity Strict	Identity Relaxed	Expectation Value	XCorr	Percolator q-Value	Percolator PEP
High	TRUE		P80419	Sequest HT (A4)	7.16687	0.00460117	a-c	28.5942	4238	A_IyII_1-3.raw	0/0					3.61499	0.002128	0.1793
Sequence	Confidence		Master Protein Accessions	Modifications	Percolator PEP Sequest HT		a-c
LICQATGFSPR	High		P01871	1xCarbamidomethyl [C3]	0.02278		a-c
Confidence	Checked		Master Protein Accessions	Identifying Node	DeltaM [ppm]	Deltam/z [Da]	a-c	RT [min]	First Scan	Spectrum File	Ions Matched	Ions Score	Identity Strict	Identity Relaxed	Expectation Value	XCorr	Percolator q-Value	Percolator PEP
High	TRUE		P01871	Sequest HT (A4)	1.18974	0.00074337	a-c	26.3556	3780	A_IyII_1-3.raw	0/0					3.04693	0	0.02278
High	TRUE		P01871	Mascot (A2)	1.18974	0.00074337	a-c	26.3556	3780	A_IyII_1-3.raw	7/108	46.21	45	38	0.00922264		0	0.004458
VFAIPPSFASIFLTK	High		P01871		0.03923		a-c
Confidence	Checked		Master Protein Accessions	Identifying Node	DeltaM [ppm]	Deltam/z [Da]	a-c	RT [min]	First Scan	Spectrum File	Ions Matched	Ions Score	Identity Strict	Identity Relaxed	Expectation Value	XCorr	Percolator q-Value	Percolator PEP
High	TRUE		P01871	Sequest HT (A4)	0.0416218	2.27245e-05	a-c	70.7685	12818	A_IyII_1-3.raw	0/0					3.12496	0	0.03923
High	TRUE		P01871	Mascot (A2)	0.0416218	2.27245e-05	a-c	70.7685	12818	A_IyII_1-3.raw	14/112	14.79	41	34	4.96016		0.004235	0.1133
High	TRUE		P01871	Sequest HT (A4)	-1.36619	-0.00111886	a-c	70.4883	12761	A_IyII_1-3.raw	0/0					2.71596	0.005193	0.2097
Antithrombin-III OS=Homo sapiens GN=SERPINC1 PE=1 SV=1	P01008	Homo sapiens	52.569	7.32759	41.86	2	a-c
Sequence	Confidence	Homo sapiens	Master Protein Accessions	Modifications	Percolator PEP Sequest HT		a-c
SNEILTAIIQGMR	High	Homo sapiens	P52297		0.1126		a-c
Confidence	Checked	Homo sapiens	Master Protein Accessions	Identifying Node	DeltaM [ppm]	Deltam/z [Da]	a-c	RT [min]	First Scan	Spectrum File	Ions Matched	Ions Score	Identity Strict	Identity Relaxed	Expectation Value	XCorr	Percolator q-Value	Percolator PEP
High	TRUE	Homo sapiens	P52297	Sequest HT (A4)	-0.219273	-0.00015851	a-c	52.0953	9066	A_IyII_1-3.raw	0/0					2.9786	0.001107	0.1126
High	TRUE	Homo sapiens	P52297	Mascot (A2)	-0.219273	-0.00015851	a-c	52.0953	9066	A_IyII_1-3.raw	10/140	45.05	46	39	0.0128654		0.001533	0.03027
Biotinidase OS=Homo sapiens GN=BTD PE=1 SV=2	P43251	Homo sapiens	61.093	7.18232	73.35	2	a-c
Sequence	Confidence	Homo sapiens	Master Protein Accessions	Modifications	Percolator PEP Sequest HT		a-c
ESPGNVQIVNGYFVHFFAPQGLPVVPK	High	Homo sapiens	Q06033		0.04736		a-c
Confidence	Checked	Homo sapiens	Master Protein Accessions	Identifying Node	DeltaM [ppm]	Deltam/z [Da]	a-c	RT [min]	First Scan	Spectrum File	Ions Matched	Ions Score	Identity Strict	Identity Relaxed	Expectation Value	XCorr	Percolator q-Value	Percolator PEP
High	TRUE	Homo sapiens	Q06033	Sequest HT (A4)	0.93715	0.000918576	a-c	64.823	11617	A_IyII_1-3.raw	0/0					2.52191	0	0.04736
High	TRUE	Homo sapiens	Q06033	Mascot (A2)	0.93715	0.000918576	a-c	64.823	11617	A_IyII_1-3.raw	16/296	20.31	45	38	3.28774		0.006202	0.1998
Clusterin OS=Homo sapiens GN=CLU PE=1 SV=1	P10909	Homo sapiens	52.461	11.804	34.44	2	a-c
Sequence	Confidence	Homo sapiens	Master Protein Accessions	Modifications	Percolator PEP Sequest HT		a-c
AATESFASDPILYRPVAVALDTKGPEIR	High	Homo sapiens	P11980-2		0.0006609		a-c
Confidence	Checked	Homo sapiens	Master Protein Accessions	Identifying Node	DeltaM [ppm]	Deltam/z [Da]	a-c	RT [min]	First Scan	Spectrum File	Ions Matched	Ions Score	Identity Strict	Identity Relaxed	Expectation Value	XCorr	Percolator q-Value	Percolator PEP
High	TRUE	Homo sapiens	P11980-2	Sequest HT (A4)	1.46343	0.00109303	a-c	39.7203	6551	A_IyII_1-3.raw	0/0					5.24453	0	0.0006609
AATESFASDPILYRPVAVALDTK	High	Homo sapiens	P11980-2		0.03389		a-c
Confidence	Checked	Homo sapiens	Master Protein Accessions	Identifying Node	DeltaM [ppm]	Deltam/z [Da]	a-c	RT [min]	First Scan	Spectrum File	Ions Matched	Ions Score	Identity Strict	Identity Relaxed	Expectation Value	XCorr	Percolator q-Value	Percolator PEP
High	TRUE	Homo sapiens	P11980-2	Sequest HT (A4)	1.87334	0.0015207	a-c	40.7151	6757	A_IyII_1-3.raw	0/0					4.40635	0	0.03389
GDYPLEAVR	High	Homo sapiens	P11980-2; P00548; P14618		0.05141		a-c
Confidence	Checked	Homo sapiens	Master Protein Accessions	Identifying Node	DeltaM [ppm]	Deltam/z [Da]	a-c	RT [min]	First Scan	Spectrum File	Ions Matched	Ions Score	Identity Strict	Identity Relaxed	Expectation Value	XCorr	Percolator q-Value	Percolator PEP
High	TRUE	Homo sapiens	P11980-2; P00548; P14618	Sequest HT (A4)	0.694688	0.000354123	a-c	27.3799	3989	A_IyII_1-3.raw	0/0					2.28648	0	0.05141
High	TRUE	Homo sapiens	P00548; P14618	Mascot (A2)	0.694688	0.000354123	a-c	27.3799	3989	A_IyII_1-3.raw	7/64	44.97	45	38	0.0100764		0	0.02178
FGVEQDVDMVFASFIR	High	Homo sapiens	P11980-2; P14618	1xOxidation [M9]	0.007265		a-c
Confidence	Checked	Homo sapiens	Master Protein Accessions	Identifying Node	DeltaM [ppm]	Deltam/z [Da]	a-c	RT [min]	First Scan	Spectrum File	Ions Matched	Ions Score	Identity Strict	Identity Relaxed	Expectation Value	XCorr	Percolator q-Value	Percolator PEP
High	TRUE	Homo sapiens	P11980-2; P14618	Sequest HT (A4)	0.790328	0.000741286	a-c	71.8975	13046	A_IyII_1-3.raw	0/0					3.8362	0	0.007265
High	TRUE	Homo sapiens	P14618	Mascot (A2)	0.790328	0.000741286	a-c	71.8975	13046	A_IyII_1-3.raw	8/164	51.7	45	38	0.00224054		0	0.001139
High	TRUE	Homo sapiens	P11980-2; P14618	Sequest HT (A4)	0.620477	0.000387983	a-c	71.5279	12971	A_IyII_1-3.raw	0/0					2.06724	0	0.02718
High	TRUE	Homo sapiens	P14618	Mascot (A2)	0.620477	0.000387983	a-c	71.5279	12971	A_IyII_1-3.raw	14/164	14.8	45	38	11.0118		0.002414	0.06085
EAEAAIYHLQLFEELRR	High	Homo sapiens	P11980-2; P14618		0.03532		a-c
Confidence	Checked	Homo sapiens	Master Protein Accessions	Identifying Node	DeltaM [ppm]	Deltam/z [Da]	a-c	RT [min]	First Scan	Spectrum File	Ions Matched	Ions Score	Identity Strict	Identity Relaxed	Expectation Value	XCorr	Percolator q-Value	Percolator PEP
High	TRUE	Homo sapiens	P11980-2; P14618	Sequest HT (A4)	1.07008	0.000558606	a-c	38.1823	6233	A_IyII_1-3.raw	0/0					4.15675	0	0.03532
High	TRUE	Homo sapiens	P11980-2; P14618	Sequest HT (A4)	1.33959	0.000932396	a-c	38.1635	6229	A_IyII_1-3.raw	0/0					2.26651	0	0.04317
High	TRUE	Homo sapiens	P14618	Mascot (A2)	1.07008	0.000558606	a-c	38.1823	6233	A_IyII_1-3.raw	10/156	13.55	46	39	21.1623		0.002414	0.06976
Complement C4-A OS=Homo sapiens GN=C4A PE=1 SV=2	P0C0L4	Homo sapiens	192.664	1.66284	117.407	2	a-c
Sequence	Confidence	Homo sapiens	Master Protein Accessions	Modifications	Percolator PEP Sequest HT		a-c
TLVTQNSGVEALIHAILR	High	Homo sapiens	P14923		0.0001236		a-c
Confidence	Checked	Homo sapiens	Master Protein Accessions	Identifying Node	DeltaM [ppm]	Deltam/z [Da]	a-c	RT [min]	First Scan	Spectrum File	Ions Matched	Ions Score	Identity Strict	Identity Relaxed	Expectation Value	XCorr	Percolator q-Value	Percolator PEP
High	TRUE	Homo sapiens	P14923	Sequest HT (A4)	0.357987	0.000230914	a-c	63.0909	11267	A_IyII_1-3.raw	0/0					4.16695	0	0.0001236
High	TRUE	Homo sapiens	P14923	Mascot (A2)	0.357987	0.000230914	a-c	63.0909	11267	A_IyII_1-3.raw	22/188	42.54	40	33	0.00623212		0	0.0009124
Sequence	Confidence	Homo sapiens	Master Protein Accessions	Modifications	Percolator PEP Sequest HT		a-c
GSSGGGCFGGSSGGYGGLGGFGGGSFR	High	Homo sapiens	P13645	1xCarbamidomethyl [C7]	0.008206		a-c
Confidence	Checked	Homo sapiens	Master Protein Accessions	Identifying Node	DeltaM [ppm]	Deltam/z [Da]	a-c	RT [min]	First Scan	Spectrum File	Ions Matched	Ions Score	Identity Strict	Identity Relaxed	Expectation Value	XCorr	Percolator q-Value	Percolator PEP
High	TRUE	Homo sapiens	P13645	Sequest HT (A4)	0.58006	0.000453024	a-c	36.4225	5867	A_IyII_1-3.raw	0/0					4.64985	0	0.008206
High	TRUE	Homo sapiens	P13645	Mascot (A2)	0.58006	0.000453024	a-c	36.4225	5867	A_IyII_1-3.raw	11/208	19.96	37	30	0.531876		0.004235	0.1688
VTMQNLNDRLASYLDKVR	High	Homo sapiens	P02533; P13645; P08779	1xOxidation [M3]	0.01751		a-c
Confidence	Checked	Homo sapiens	Master Protein Accessions	Identifying Node	DeltaM [ppm]	Deltam/z [Da]	a-c	RT [min]	First Scan	Spectrum File	Ions Matched	Ions Score	Identity Strict	Identity Relaxed	Expectation Value	XCorr	Percolator q-Value	Percolator PEP
High	TRUE	Homo sapiens	P02533; P13645; P08779	Sequest HT (A4)	0.86395	0.000464831	a-c	33.1788	5192	A_IyII_1-3.raw	0/0					3.72723	0	0.01751
High	TRUE	Homo sapiens	P02533; P13645; P08779	Mascot (A2)	0.86395	0.000464831	a-c	33.1788	5192	A_IyII_1-3.raw	22/192	35.87	46	39	0.118773		0	0.007251
VTMQNLNDRLASYLDKVR	High	Homo sapiens	P02533; P13645; P08779		0.002574		a-c
Confidence	Checked	Homo sapiens	Master Protein Accessions	Identifying Node	DeltaM [ppm]	Deltam/z [Da]	a-c	RT [min]	First Scan	Spectrum File	Ions Matched	Ions Score	Identity Strict	Identity Relaxed	Expectation Value	XCorr	Percolator q-Value	Percolator PEP
High	TRUE	Homo sapiens	P02533; P13645; P08779	Sequest HT (A4)	0.661476	0.000353249	a-c	37.2045	6030	A_IyII_1-3.raw	0/0					2.96044	0	0.07794
High	TRUE	Homo sapiens	P02533; P13645; P08779	Sequest HT (A4)	0.353469	0.000251685	a-c	37.1492	6018	A_IyII_1-3.raw	0/0					4.50827	0	0.002574
High	TRUE	Homo sapiens	P02533; P13645; P08779	Mascot (A2)	0.353469	0.000251685	a-c	37.1492	6018	A_IyII_1-3.raw	11/192	22.13	46	39	2.56238		0	0.009264
SQYEQLAEQNRKDAEAWFNEK	High	Homo sapiens	P13645		0.001862		a-c
Confidence	Checked	Homo sapiens	Master Protein Accessions	Identifying Node	DeltaM [ppm]	Deltam/z [Da]	a-c	RT [min]	First Scan	Spectrum File	Ions Matched	Ions Score	Identity Strict	Identity Relaxed	Expectation Value	XCorr	Percolator q-Value	Percolator PEP
High	TRUE	Homo sapiens	P13645	Mascot (A2)	1.06397	0.000916502	a-c	32.9988	5155	A_IyII_1-3.raw	15/236	18.37	45	38	5.38302		0	0.01853
High	TRUE	Homo sapiens	P13645	Mascot (A2)	0.822577	0.000531427	a-c	32.8754	5129	A_IyII_1-3.raw	10/236	9.5	45	38	40.028		0	0.0212
High	TRUE	Homo sapiens	P13645	Sequest HT (A4)	0.822577	0.000531427	a-c	32.8754	5129	A_IyII_1-3.raw	0/0					4.11616	0	0.01176
High	TRUE	Homo sapiens	P13645	Sequest HT (A4)	1.06397	0.000916502	a-c	32.9988	5155	A_IyII_1-3.raw	0/0					4.3842	0	0.001862
NVQALEIELQSQLALK	High	Homo sapiens	P13645		0.02573		a-c
Confidence	Checked	Homo sapiens	Master Protein Accessions	Identifying Node	DeltaM [ppm]	Deltam/z [Da]	a-c	RT [min]	First Scan	Spectrum File	Ions Matched	Ions Score	Identity Strict	Identity Relaxed	Expectation Value	XCorr	Percolator q-Value	Percolator PEP
High	TRUE	Homo sapiens	P13645	Sequest HT (A4)	1.08962	0.000979027	a-c	45.6435	7761	A_IyII_1-3.raw	0/0					5.59467	0	0.02573
High	TRUE	Homo sapiens	P13645	Mascot (A2)	1.08962	0.000979027	a-c	45.6435	7761	A_IyII_1-3.raw	11/180	92.61	42	35	1.07243e-07		0	0.005481
High	TRUE	Homo sapiens	P13645	Sequest HT (A4)	1.15006	0.000688892	a-c	45.452	7722	A_IyII_1-3.raw	0/0					3.83192	0	0.01222
High	TRUE	Homo sapiens	P13645	Mascot (A2)	1.15006	0.000688892	a-c	45.452	7722	A_IyII_1-3.raw	16/180	36.92	42	35	0.0398748		0	0.00112
ELTTEIDNNIEQISSYK	High	Homo sapiens	P13645		0.0004116		a-c
Confidence	Checked	Homo sapiens	Master Protein Accessions	Identifying Node	DeltaM [ppm]	Deltam/z [Da]	a-c	RT [min]	First Scan	Spectrum File	Ions Matched	Ions Score	Identity Strict	Identity Relaxed	Expectation Value	XCorr	Percolator q-Value	Percolator PEP
High	TRUE	Homo sapiens	P13645	Mascot (A2)	0.348856	0.000232218	a-c	39.4293	6491	A_IyII_1-3.raw	12/164	36.27	46	39	0.102492		0	0.001555
High	TRUE	Homo sapiens	P13645	Sequest HT (A4)	0.348856	0.000232218	a-c	39.4293	6491	A_IyII_1-3.raw	0/0					5.78143	0	0.001035
High	TRUE	Homo sapiens	P13645	Mascot (A2)	0.508408	0.000507638	a-c	39.4771	6501	A_IyII_1-3.raw	11/164	109.57	46	39	4.77348e-09		0	1.045e-05
High	TRUE	Homo sapiens	P13645	Sequest HT (A4)	0.508408	0.000507638	a-c	39.4771	6501	A_IyII_1-3.raw	0/0					6.06999	0	0.0004116
NVSTGDVNVEMNAAPGVDLTQLLNNMR	High	Homo sapiens	P13645		0.0004435		a-c
Confidence	Checked	Homo sapiens	Master Protein Accessions	Identifying Node	DeltaM [ppm]	Deltam/z [Da]	a-c	RT [min]	First Scan	Spectrum File	Ions Matched	Ions Score	Identity Strict	Identity Relaxed	Expectation Value	XCorr	Percolator q-Value	Percolator PEP
High	TRUE	Homo sapiens	P13645	Sequest HT (A4)	1.05618	0.00151689	a-c	67.4888	12153	A_IyII_1-3.raw	0/0					4.53277	0	0.02818
High	TRUE	Homo sapiens	P13645	Mascot (A2)	1.05618	0.00151689	a-c	67.4888	12153	A_IyII_1-3.raw	10/312	63.29	46	39	0.0002285		0	0.004374
High	TRUE	Homo sapiens	P13645	Mascot (A2)	0.924008	0.000884705	a-c	67.4648	12148	A_IyII_1-3.raw	10/312	47.37	46	39	0.00893986		0	0.0003935
High	TRUE	Homo sapiens	P13645	Sequest HT (A4)	0.924008	0.000884705	a-c	67.4648	12148	A_IyII_1-3.raw	0/0					7.20022	0	0.0004435
NVSTGDVNVEMNAAPGVDLTQLLNNMR	High	Homo sapiens	P13645	1xOxidation [M11]	0.0007725		a-c
Confidence	Checked	Homo sapiens	Master Protein Accessions	Identifying Node	DeltaM [ppm]	Deltam/z [Da]	a-c	RT [min]	First Scan	Spectrum File	Ions Matched	Ions Score	Identity Strict	Identity Relaxed	Expectation Value	XCorr	Percolator q-Value	Percolator PEP
High	TRUE	Homo sapiens	P13645	Sequest HT (A4)	0.376086	0.000362094	a-c	61.1207	10869	A_IyII_1-3.raw	0/0					5.73194	0	0.0007725
High	TRUE	Homo sapiens	P13645	Mascot (A2)	0.376086	0.000362094	a-c	61.1207	10869	A_IyII_1-3.raw	18/312	36.28	46	39	0.109675		0	0.001976
NVSTGDVNVEMNAAPGVDLTQLLNNMR	High	Homo sapiens	P13645	2xOxidation [M11; M26]	0.0009149		a-c
Confidence	Checked	Homo sapiens	Master Protein Accessions	Identifying Node	DeltaM [ppm]	Deltam/z [Da]	a-c	RT [min]	First Scan	Spectrum File	Ions Matched	Ions Score	Identity Strict	Identity Relaxed	Expectation Value	XCorr	Percolator q-Value	Percolator PEP
High	TRUE	Homo sapiens	P13645	Sequest HT (A4)	1.28422	0.00124329	a-c	43.0002	7224	A_IyII_1-3.raw	0/0					6.92282	0	0.0009149
High	TRUE	Homo sapiens	P13645	Mascot (A2)	1.28422	0.00124329	a-c	43.0002	7224	A_IyII_1-3.raw	26/312	39.8	46	39	0.0482674		0	0.001488
IRLENEIQTYR	High	Homo sapiens	P13645		0.02528		a-c
Confidence	Checked	Homo sapiens	Master Protein Accessions	Identifying Node	DeltaM [ppm]	Deltam/z [Da]	a-c	RT [min]	First Scan	Spectrum File	Ions Matched	Ions Score	Identity Strict	Identity Relaxed	Expectation Value	XCorr	Percolator q-Value	Percolator PEP
High	TRUE	Homo sapiens	P13645	Mascot (A2)	1.10069	0.000789622	a-c	25.9627	3701	A_IyII_1-3.raw	15/116	44.62	46	39	0.0155401		0	0.002447
High	TRUE	Homo sapiens	P13645	Sequest HT (A4)	1.10069	0.000789622	a-c	25.9627	3701	A_IyII_1-3.raw	0/0					3.67548	0	0.02528
High	TRUE	Homo sapiens	P13645	Mascot (A2)	0.751003	0.000359172	a-c	25.9481	3698	A_IyII_1-3.raw	10/116	28.2	46	39	0.681557		0.004235	0.1434
TIDDLKNQILNLTTDNANILLQIDNAR	High	Homo sapiens	P13645		0.003006		a-c
Confidence	Checked	Homo sapiens	Master Protein Accessions	Identifying Node	DeltaM [ppm]	Deltam/z [Da]	a-c	RT [min]	First Scan	Spectrum File	Ions Matched	Ions Score	Identity Strict	Identity Relaxed	Expectation Value	XCorr	Percolator q-Value	Percolator PEP
High	TRUE	Homo sapiens	P13645	Sequest HT (A4)	1.36719	0.00104338	a-c	74.4394	13553	A_IyII_1-3.raw	0/0					3.81536	0	0.003006
High	TRUE	Homo sapiens	P13645	Mascot (A2)	1.36719	0.00104338	a-c	74.4394	13553	A_IyII_1-3.raw	7/292	28.84	44	37	0.328371		0	0.002248
High	TRUE	Homo sapiens	P13645	Mascot (A2)	3.04672	0.00232512	a-c	74.2432	13513	A_IyII_1-3.raw	8/292	30.58	43	36	0.206015		0.002414	0.04917
SQYEQLAEQNR	High	Homo sapiens	P13645		0.01885		a-c
Confidence	Checked	Homo sapiens	Master Protein Accessions	Identifying Node	DeltaM [ppm]	Deltam/z [Da]	a-c	RT [min]	First Scan	Spectrum File	Ions Matched	Ions Score	Identity Strict	Identity Relaxed	Expectation Value	XCorr	Percolator q-Value	Percolator PEP
High	TRUE	Homo sapiens	P13645	Sequest HT (A4)	0.355604	0.000242813	a-c	21.5197	2806	A_IyII_1-3.raw	0/0					3.2321	0	0.01885
High	TRUE	Homo sapiens	P13645	Mascot (A2)	0.355604	0.000242813	a-c	21.5197	2806	A_IyII_1-3.raw	8/116	52.36	43	36	0.00141474		0	0.006769
ADLEMQIESLTEELAYLK	High	Homo sapiens	P13645		0.0007226		a-c
Confidence	Checked	Homo sapiens	Master Protein Accessions	Identifying Node	DeltaM [ppm]	Deltam/z [Da]	a-c	RT [min]	First Scan	Spectrum File	Ions Matched	Ions Score	Identity Strict	Identity Relaxed	Expectation Value	XCorr	Percolator q-Value	Percolator PEP
High	TRUE	Homo sapiens	P13645	Sequest HT (A4)	1.00765	0.00105604	a-c	81.5456	14892	A_IyII_1-3.raw	0/0					4.44223	0	0.0007226
High	TRUE	Homo sapiens	P13645	Mascot (A2)	1.00765	0.00105604	a-c	81.5456	14892	A_IyII_1-3.raw	15/184	79.7	46	39	5.2617e-06		0	2.727e-05
ADLEMQIESLTEELAYLKK	High	Homo sapiens	P13645		0.004577		a-c
Confidence	Checked	Homo sapiens	Master Protein Accessions	Identifying Node	DeltaM [ppm]	Deltam/z [Da]	a-c	RT [min]	First Scan	Spectrum File	Ions Matched	Ions Score	Identity Strict	Identity Relaxed	Expectation Value	XCorr	Percolator q-Value	Percolator PEP
High	TRUE	Homo sapiens	P13645	Sequest HT (A4)	1.61171	0.00179234	a-c	67.3598	12126	A_IyII_1-3.raw	0/0					4.21985	0	0.004577
High	TRUE	Homo sapiens	P13645	Mascot (A2)	1.61171	0.00179234	a-c	67.3598	12126	A_IyII_1-3.raw	10/196	69.35	46	39	5.47913e-05		0	0.0003988
High	TRUE	Homo sapiens	P13645	Sequest HT (A4)	1.27636	0.000946267	a-c	67.2369	12101	A_IyII_1-3.raw	0/0					3.21924	0	0.04895
High	TRUE	Homo sapiens	P13645	Mascot (A2)	1.27636	0.000946267	a-c	67.2369	12101	A_IyII_1-3.raw	10/196	19.99	46	39	4.75093		0	0.02269
ADLEMQIESLTEELAYLKK	High	Homo sapiens	P13645	1xOxidation [M5]	0.0003529		a-c
Confidence	Checked	Homo sapiens	Master Protein Accessions	Identifying Node	DeltaM [ppm]	Deltam/z [Da]	a-c	RT [min]	First Scan	Spectrum File	Ions Matched	Ions Score	Identity Strict	Identity Relaxed	Expectation Value	XCorr	Percolator q-Value	Percolator PEP
High	TRUE	Homo sapiens	P13645	Mascot (A2)	0.649101	0.000484692	a-c	67.8459	12226	A_IyII_1-3.raw	13/196	36.7	46	39	0.104247		0	0.00272
High	TRUE	Homo sapiens	P13645	Sequest HT (A4)	0.649101	0.000484692	a-c	67.8459	12226	A_IyII_1-3.raw	0/0					4.68828	0	0.0003529
High	TRUE	Homo sapiens	P13645	Sequest HT (A4)	0.600612	0.000672726	a-c	68.3951	12337	A_IyII_1-3.raw	0/0					2.72515	0	0.05243
High	TRUE	Homo sapiens	P13645	Mascot (A2)	0.600612	0.000672726	a-c	68.3951	12337	A_IyII_1-3.raw	5/196	13.84	46	39	19.6218		0.002414	0.04096
VLDELTLTK	High	Homo sapiens	P13645		0.04962		a-c
Confidence	Checked	Homo sapiens	Master Protein Accessions	Identifying Node	DeltaM [ppm]	Deltam/z [Da]	a-c	RT [min]	First Scan	Spectrum File	Ions Matched	Ions Score	Identity Strict	Identity Relaxed	Expectation Value	XCorr	Percolator q-Value	Percolator PEP
High	TRUE	Homo sapiens	P13645	Sequest HT (A4)	0.957798	0.000494031	a-c	31.08	4752	A_IyII_1-3.raw	0/0					3.51722	0	0.04962
High	TRUE	Homo sapiens	P13645	Mascot (A2)	0.957798	0.000494031	a-c	31.08	4752	A_IyII_1-3.raw	7/64	54.69	43	36	0.000771459		0	0.02569
QSLEASLAETEGR	High	Homo sapiens	P13645		0.003607		a-c
Confidence	Checked	Homo sapiens	Master Protein Accessions	Identifying Node	DeltaM [ppm]	Deltam/z [Da]	a-c	RT [min]	First Scan	Spectrum File	Ions Matched	Ions Score	Identity Strict	Identity Relaxed	Expectation Value	XCorr	Percolator q-Value	Percolator PEP
High	TRUE	Homo sapiens	P13645	Sequest HT (A4)	0.769029	0.000534737	a-c	28.387	4195	A_IyII_1-3.raw	0/0					4.06348	0	0.003607
High	TRUE	Homo sapiens	P13645	Mascot (A2)	0.769029	0.000534737	a-c	28.387	4195	A_IyII_1-3.raw	9/144	86.56	45	38	7.29083e-07		0	0.000468
LKYENEVALR	High	Homo sapiens	P13645		0.05835		a-c
Confidence	Checked	Homo sapiens	Master Protein Accessions	Identifying Node	DeltaM [ppm]	Deltam/z [Da]	a-c	RT [min]	First Scan	Spectrum File	Ions Matched	Ions Score	Identity Strict	Identity Relaxed	Expectation Value	XCorr	Percolator q-Value	Percolator PEP
High	TRUE	Homo sapiens	P13645	Sequest HT (A4)	0.189723	0.000117124	a-c	22.8364	3069	A_IyII_1-3.raw	0/0					2.92696	0	0.05835
High	TRUE	Homo sapiens	P13645	Mascot (A2)	0.189723	0.000117124	a-c	22.8364	3069	A_IyII_1-3.raw	7/104	46.55	45	38	0.00815304		0.001533	0.02822
High	TRUE	Homo sapiens	P13645	Mascot (A2)	0.327135	0.000134636	a-c	22.8212	3066	A_IyII_1-3.raw	7/104	53.39	45	38	0.00168779		0.002414	0.06847
NQILNLTTDNANILLQIDNAR	High	Homo sapiens	P13645		0.08385		a-c
Confidence	Checked	Homo sapiens	Master Protein Accessions	Identifying Node	DeltaM [ppm]	Deltam/z [Da]	a-c	RT [min]	First Scan	Spectrum File	Ions Matched	Ions Score	Identity Strict	Identity Relaxed	Expectation Value	XCorr	Percolator q-Value	Percolator PEP
High	TRUE	Homo sapiens	P13645	Sequest HT (A4)	1.18883	0.000938092	a-c	54.6537	9584	A_IyII_1-3.raw	0/0					2.74382	0	0.08385
LAADDFRLKYENEVALR	High	Homo sapiens	P13645		0.0452		a-c
Confidence	Checked	Homo sapiens	Master Protein Accessions	Identifying Node	DeltaM [ppm]	Deltam/z [Da]	a-c	RT [min]	First Scan	Spectrum File	Ions Matched	Ions Score	Identity Strict	Identity Relaxed	Expectation Value	XCorr	Percolator q-Value	Percolator PEP
High	TRUE	Homo sapiens	P13645	Sequest HT (A4)	0.772016	0.000390459	a-c	32.3979	5028	A_IyII_1-3.raw	0/0					3.34709	0	0.0452
QSVEADINGLRR	High	Homo sapiens	P13645; P13646	1xDeamidated [N8]	0.1063		a-c
Confidence	Checked	Homo sapiens	Master Protein Accessions	Identifying Node	DeltaM [ppm]	Deltam/z [Da]	a-c	RT [min]	First Scan	Spectrum File	Ions Matched	Ions Score	Identity Strict	Identity Relaxed	Expectation Value	XCorr	Percolator q-Value	Percolator PEP
High	TRUE	Homo sapiens	P13645; P13646	Sequest HT (A4)	0.521473	0.000236176	a-c	25.914	3691	A_IyII_1-3.raw	0/0					2.12753	0.001107	0.1063
ALEESNYELEGK	High	Homo sapiens	P13645		0.1196		a-c
Confidence	Checked	Homo sapiens	Master Protein Accessions	Identifying Node	DeltaM [ppm]	Deltam/z [Da]	a-c	RT [min]	First Scan	Spectrum File	Ions Matched	Ions Score	Identity Strict	Identity Relaxed	Expectation Value	XCorr	Percolator q-Value	Percolator PEP
High	TRUE	Homo sapiens	P13645	Sequest HT (A4)	0.407802	0.00028172	a-c	24.8278	3472	A_IyII_1-3.raw	0/0					2.4761	0.001107	0.1196
High	TRUE	Homo sapiens	P13645	Mascot (A2)	0.407802	0.00028172	a-c	24.8278	3472	A_IyII_1-3.raw	6/112	31.77	43	36	0.156572		0.004235	0.1452
Sequence	Confidence	Homo sapiens	Master Protein Accessions	Modifications	Percolator PEP Sequest HT		a-c
DKILTATIENNRVILEIDNAR	High	Homo sapiens	P13646		0.01722		a-c
Confidence	Checked	Homo sapiens	Master Protein Accessions	Identifying Node	DeltaM [ppm]	Deltam/z [Da]	a-c	RT [min]	First Scan	Spectrum File	Ions Matched	Ions Score	Identity Strict	Identity Relaxed	Expectation Value	XCorr	Percolator q-Value	Percolator PEP
High	TRUE	Homo sapiens	P13646	Sequest HT (A4)	1.04403	0.000629371	a-c	35.2596	5625	A_IyII_1-3.raw	0/0					3.83137	0	0.01722
High	TRUE	Homo sapiens	P13646	Mascot (A2)	1.04403	0.000629371	a-c	35.2596	5625	A_IyII_1-3.raw	9/236	9.44	42	35	22.3828		0.002414	0.07397
ITMQNLNDRLASYLEKVR	High	Homo sapiens	P13646	1xOxidation [M3]	0.02287		a-c
Confidence	Checked	Homo sapiens	Master Protein Accessions	Identifying Node	DeltaM [ppm]	Deltam/z [Da]	a-c	RT [min]	First Scan	Spectrum File	Ions Matched	Ions Score	Identity Strict	Identity Relaxed	Expectation Value	XCorr	Percolator q-Value	Percolator PEP
High	TRUE	Homo sapiens	P13646	Sequest HT (A4)	-0.289982	-0.000158051	a-c	34.4754	5462	A_IyII_1-3.raw	0/0					3.62735	0	0.02287
High	TRUE	Homo sapiens	P13646	Mascot (A2)	-0.289982	-0.000158051	a-c	34.4754	5462	A_IyII_1-3.raw	18/192	25.49	45	38	1.02148		0.002414	0.03981
LQSSSASYGGGFGGGSCQLGGGR	High	Homo sapiens	P13646	1xCarbamidomethyl [C17]	0.002418		a-c
Confidence	Checked	Homo sapiens	Master Protein Accessions	Identifying Node	DeltaM [ppm]	Deltam/z [Da]	a-c	RT [min]	First Scan	Spectrum File	Ions Matched	Ions Score	Identity Strict	Identity Relaxed	Expectation Value	XCorr	Percolator q-Value	Percolator PEP
High	TRUE	Homo sapiens	P13646	Sequest HT (A4)	1.83078	0.0019653	a-c	27.5617	4026	A_IyII_1-3.raw	0/0					4.70194	0	0.002418
High	TRUE	Homo sapiens	P13646	Mascot (A2)	1.83078	0.0019653	a-c	27.5617	4026	A_IyII_1-3.raw	13/260	75.13	42	35	5.70224e-06		0	0.0008684
High	TRUE	Homo sapiens	P13646	Sequest HT (A4)	1.85294	0.00132606	a-c	27.5028	4014	A_IyII_1-3.raw	0/0					2.94085	0	0.03189
High	TRUE	Homo sapiens	P13646	Mascot (A2)	1.85294	0.00132606	a-c	27.5028	4014	A_IyII_1-3.raw	15/260	24.17	42	35	0.711288		0.004235	0.1138
EVSTNTAMIQTSK	High	Homo sapiens	P13646		0.02764		a-c
Confidence	Checked	Homo sapiens	Master Protein Accessions	Identifying Node	DeltaM [ppm]	Deltam/z [Da]	a-c	RT [min]	First Scan	Spectrum File	Ions Matched	Ions Score	Identity Strict	Identity Relaxed	Expectation Value	XCorr	Percolator q-Value	Percolator PEP
High	TRUE	Homo sapiens	P13646	Sequest HT (A4)	1.60781	0.00113326	a-c	22.3354	2967	A_IyII_1-3.raw	0/0					2.77694	0	0.02764
High	TRUE	Homo sapiens	P13646	Mascot (A2)	1.60781	0.00113326	a-c	22.3354	2967	A_IyII_1-3.raw	8/128	41.83	45	38	0.0253469		0	0.008148
ITMQNLNDRLASYLEKVR	High	Homo sapiens	P13646		0.02731		a-c
Confidence	Checked	Homo sapiens	Master Protein Accessions	Identifying Node	DeltaM [ppm]	Deltam/z [Da]	a-c	RT [min]	First Scan	Spectrum File	Ions Matched	Ions Score	Identity Strict	Identity Relaxed	Expectation Value	XCorr	Percolator q-Value	Percolator PEP
High	TRUE	Homo sapiens	P13646	Sequest HT (A4)	0.833382	0.000601189	a-c	38.9358	6388	A_IyII_1-3.raw	0/0					4.17433	0	0.02731
High	TRUE	Homo sapiens	P13646	Mascot (A2)	0.833382	0.000601189	a-c	38.9358	6388	A_IyII_1-3.raw	19/192	32.79	45	38	0.181502		0.002414	0.05073
EVSTNTAMIQTSKTEITELRR	High	Homo sapiens	P13646		0.08761		a-c
Confidence	Checked	Homo sapiens	Master Protein Accessions	Identifying Node	DeltaM [ppm]	Deltam/z [Da]	a-c	RT [min]	First Scan	Spectrum File	Ions Matched	Ions Score	Identity Strict	Identity Relaxed	Expectation Value	XCorr	Percolator q-Value	Percolator PEP
High	TRUE	Homo sapiens	P13646	Sequest HT (A4)	1.13718	0.000684653	a-c	28.536	4226	A_IyII_1-3.raw	0/0					3.35367	0	0.08761
High	TRUE	Homo sapiens	P13646	Mascot (A2)	1.13718	0.000684653	a-c	28.536	4226	A_IyII_1-3.raw	11/224	25.18	46	39	1.49252		0.002414	0.04153
VILEIDNAR	High	Homo sapiens	P13646		0.1389		a-c
Confidence	Checked	Homo sapiens	Master Protein Accessions	Identifying Node	DeltaM [ppm]	Deltam/z [Da]	a-c	RT [min]	First Scan	Spectrum File	Ions Matched	Ions Score	Identity Strict	Identity Relaxed	Expectation Value	XCorr	Percolator q-Value	Percolator PEP
High	TRUE	Homo sapiens	P13646	Sequest HT (A4)	0.842527	0.000439205	a-c	28.488	4216	A_IyII_1-3.raw	0/0					2.41711	0.001107	0.1389
High	TRUE	Homo sapiens	P13646	Mascot (A2)	0.842527	0.000439205	a-c	28.488	4216	A_IyII_1-3.raw	11/72	26.44	44	37	0.704339		0.002414	0.07491
MLLDIKTRLEQEIATYR	High	Homo sapiens	P13646		0.1593		a-c
Confidence	Checked	Homo sapiens	Master Protein Accessions	Identifying Node	DeltaM [ppm]	Deltam/z [Da]	a-c	RT [min]	First Scan	Spectrum File	Ions Matched	Ions Score	Identity Strict	Identity Relaxed	Expectation Value	XCorr	Percolator q-Value	Percolator PEP
High	TRUE	Homo sapiens	P13646	Sequest HT (A4)	0.650512	0.000340403	a-c	40.4282	6698	A_IyII_1-3.raw	0/0					3.08147	0.002128	0.1593
High	TRUE	Homo sapiens	P13646	Mascot (A2)	0.650512	0.000340403	a-c	40.4282	6698	A_IyII_1-3.raw	8/172	11.27	44	37	19.5458		0.002414	0.05733
LTMQNLNDRLASYLEK	High	Homo sapiens	P13646		0.1011		a-c
Confidence	Checked	Homo sapiens	Master Protein Accessions	Identifying Node	DeltaM [ppm]	Deltam/z [Da]	a-c	RT [min]	First Scan	Spectrum File	Ions Matched	Ions Score	Identity Strict	Identity Relaxed	Expectation Value	XCorr	Percolator q-Value	Percolator PEP
High	TRUE	Homo sapiens	P13646	Sequest HT (A4)	0.928626	0.000590911	a-c	37.9393	6183	A_IyII_1-3.raw	0/0					4.9358	0.001107	0.1011
QSVEADINGLRR	High	Homo sapiens	P13645; P13646	1xDeamidated [N8]	0.1063		a-c
Confidence	Checked	Homo sapiens	Master Protein Accessions	Identifying Node	DeltaM [ppm]	Deltam/z [Da]	a-c	RT [min]	First Scan	Spectrum File	Ions Matched	Ions Score	Identity Strict	Identity Relaxed	Expectation Value	XCorr	Percolator q-Value	Percolator PEP
High	TRUE	Homo sapiens	P13645; P13646	Sequest HT (A4)	0.521473	0.000236176	a-c	25.914	3691	A_IyII_1-3.raw	0/0					2.12753	0.001107	0.1063
Sequence	Confidence	Homo sapiens	Master Protein Accessions	Modifications	Percolator PEP Sequest HT		a-c
NKLNDLEDALQQAK	High	Homo sapiens	P04264		0.005729		a-c
Confidence	Checked	Homo sapiens	Master Protein Accessions	Identifying Node	DeltaM [ppm]	Deltam/z [Da]	a-c	RT [min]	First Scan	Spectrum File	Ions Matched	Ions Score	Identity Strict	Identity Relaxed	Expectation Value	XCorr	Percolator q-Value	Percolator PEP
High	TRUE	Homo sapiens	P04264	Mascot (A2)	1.06241	0.000849844	a-c	32.8562	5125	A_IyII_1-3.raw	20/156	80.25	45	38	3.74273e-06		0	0.0008384
High	TRUE	Homo sapiens	P04264	Sequest HT (A4)	1.06241	0.000849844	a-c	32.8562	5125	A_IyII_1-3.raw	0/0					5.16153	0	0.005729
THNLEPYFESFINNLR	High	Homo sapiens	P04264		0.001875		a-c
Confidence	Checked	Homo sapiens	Master Protein Accessions	Identifying Node	DeltaM [ppm]	Deltam/z [Da]	a-c	RT [min]	First Scan	Spectrum File	Ions Matched	Ions Score	Identity Strict	Identity Relaxed	Expectation Value	XCorr	Percolator q-Value	Percolator PEP
High	TRUE	Homo sapiens	P04264	Sequest HT (A4)	1.02032	0.00101725	a-c	46.0844	7852	A_IyII_1-3.raw	0/0					4.2534	0	0.003438
High	TRUE	Homo sapiens	P04264	Mascot (A2)	1.02032	0.00101725	a-c	46.0844	7852	A_IyII_1-3.raw	10/172	32.1	46	39	0.29575		0	0.006045
High	TRUE	Homo sapiens	P04264	Sequest HT (A4)	1.25845	0.000836443	a-c	45.5597	7744	A_IyII_1-3.raw	0/0					5.76254	0	0.001875
High	TRUE	Homo sapiens	P04264	Mascot (A2)	1.25845	0.000836443	a-c	45.5597	7744	A_IyII_1-3.raw	6/172	30.71	46	39	0.407352		0	0.01872
FLEQQNQVLQTKWELLQQVDTSTR	High	Homo sapiens	P04264		0.0002872		a-c
Confidence	Checked	Homo sapiens	Master Protein Accessions	Identifying Node	DeltaM [ppm]	Deltam/z [Da]	a-c	RT [min]	First Scan	Spectrum File	Ions Matched	Ions Score	Identity Strict	Identity Relaxed	Expectation Value	XCorr	Percolator q-Value	Percolator PEP
High	TRUE	Homo sapiens	P04264	Sequest HT (A4)	1.1101	0.00108513	a-c	40.9777	6811	A_IyII_1-3.raw	0/0					8.96771	0	0.0002872
High	TRUE	Homo sapiens	P04264	Mascot (A2)	1.1101	0.00108513	a-c	40.9777	6811	A_IyII_1-3.raw	15/264	61.27	46	39	0.000339522		0	0.0001529
NKLNDLEDALQQAKEDLAR	High	Homo sapiens	P04264		0.01152		a-c
Confidence	Checked	Homo sapiens	Master Protein Accessions	Identifying Node	DeltaM [ppm]	Deltam/z [Da]	a-c	RT [min]	First Scan	Spectrum File	Ions Matched	Ions Score	Identity Strict	Identity Relaxed	Expectation Value	XCorr	Percolator q-Value	Percolator PEP
High	TRUE	Homo sapiens	P04264	Sequest HT (A4)	0.619058	0.000338025	a-c	40.7786	6770	A_IyII_1-3.raw	0/0					4.27323	0	0.01152
High	TRUE	Homo sapiens	P04264	Mascot (A2)	0.619058	0.000338025	a-c	40.7786	6770	A_IyII_1-3.raw	18/216	45.07	46	39	0.0136869		0	0.0008023
LNDLEDALQQAKEDLAR	High	Homo sapiens	P04264		0.004751		a-c
Confidence	Checked	Homo sapiens	Master Protein Accessions	Identifying Node	DeltaM [ppm]	Deltam/z [Da]	a-c	RT [min]	First Scan	Spectrum File	Ions Matched	Ions Score	Identity Strict	Identity Relaxed	Expectation Value	XCorr	Percolator q-Value	Percolator PEP
High	TRUE	Homo sapiens	P04264	Sequest HT (A4)	0.772167	0.000499846	a-c	41.5902	6935	A_IyII_1-3.raw	0/0					6.09534	0	0.004751
High	TRUE	Homo sapiens	P04264	Mascot (A2)	0.772167	0.000499846	a-c	41.5902	6935	A_IyII_1-3.raw	21/188	51.74	46	39	0.00301147		0	0.001429
KQISNLQQSISDAEQR	High	Homo sapiens	P04264		0.0339		a-c
Confidence	Checked	Homo sapiens	Master Protein Accessions	Identifying Node	DeltaM [ppm]	Deltam/z [Da]	a-c	RT [min]	First Scan	Spectrum File	Ions Matched	Ions Score	Identity Strict	Identity Relaxed	Expectation Value	XCorr	Percolator q-Value	Percolator PEP
High	TRUE	Homo sapiens	P04264	Sequest HT (A4)	0.827148	0.000508681	a-c	24.8126	3469	A_IyII_1-3.raw	0/0					3.12621	0	0.0339
High	TRUE	Homo sapiens	P04264	Mascot (A2)	0.827148	0.000508681	a-c	24.8126	3469	A_IyII_1-3.raw	8/180	25.23	46	39	1.43285		0	0.006956
SLDLDSIIAEVK	High	Homo sapiens	P04264; P50446; Q6P6Q2; Q5XQN5		0.01304		a-c
Confidence	Checked	Homo sapiens	Master Protein Accessions	Identifying Node	DeltaM [ppm]	Deltam/z [Da]	a-c	RT [min]	First Scan	Spectrum File	Ions Matched	Ions Score	Identity Strict	Identity Relaxed	Expectation Value	XCorr	Percolator q-Value	Percolator PEP
High	TRUE	Homo sapiens	P04264; P50446; Q6P6Q2; Q5XQN5	Sequest HT (A4)	1.32129	0.000860632	a-c	58.5925	10359	A_IyII_1-3.raw	0/0					2.3961	0	0.09174
High	TRUE	Homo sapiens	P04264; P50446; Q6P6Q2; Q5XQN5	Mascot (A2)	1.22758	0.000799597	a-c	52.338	9114	A_IyII_1-3.raw	8/88	67.52	45	38	7.02999e-05		0	0.002653
High	TRUE	Homo sapiens	P04264; P50446; Q6P6Q2; Q5XQN5	Sequest HT (A4)	1.22758	0.000799597	a-c	52.338	9114	A_IyII_1-3.raw	0/0					4.72271	0	0.01304
High	TRUE	Homo sapiens	P04264; P50446; Q6P6Q2; Q5XQN5	Mascot (A2)	0.946471	0.000616491	a-c	58.463	10333	A_IyII_1-3.raw	8/88	28.91	45	39	0.510516		0.004235	0.1298
SGGGFSSGSAGIINYQR	High	Homo sapiens	P04264		0.007337		a-c
Confidence	Checked	Homo sapiens	Master Protein Accessions	Identifying Node	DeltaM [ppm]	Deltam/z [Da]	a-c	RT [min]	First Scan	Spectrum File	Ions Matched	Ions Score	Identity Strict	Identity Relaxed	Expectation Value	XCorr	Percolator q-Value	Percolator PEP
High	TRUE	Homo sapiens	P04264	Sequest HT (A4)	1.26469	0.0010483	a-c	29.3917	4402	A_IyII_1-3.raw	0/0					4.08467	0	0.007337
High	TRUE	Homo sapiens	P04264	Mascot (A2)	1.26469	0.0010483	a-c	29.3917	4402	A_IyII_1-3.raw	9/140	75.72	44	37	8.04822e-06		0	0.000565
QISNLQQSISDAEQR	High	Homo sapiens	P04264		0.002472		a-c
Confidence	Checked	Homo sapiens	Master Protein Accessions	Identifying Node	DeltaM [ppm]	Deltam/z [Da]	a-c	RT [min]	First Scan	Spectrum File	Ions Matched	Ions Score	Identity Strict	Identity Relaxed	Expectation Value	XCorr	Percolator q-Value	Percolator PEP
High	TRUE	Homo sapiens	P04264	Sequest HT (A4)	1.28324	0.00110157	a-c	29.3523	4394	A_IyII_1-3.raw	0/0					4.74671	0	0.002472
High	TRUE	Homo sapiens	P04264	Mascot (A2)	1.28324	0.00110157	a-c	29.3523	4394	A_IyII_1-3.raw	11/168	91.22	46	39	3.53383e-07		0	0.0001036
SKAEAESLYQSKYEELQITAGR	High	Homo sapiens	P04264		0.002953		a-c
Confidence	Checked	Homo sapiens	Master Protein Accessions	Identifying Node	DeltaM [ppm]	Deltam/z [Da]	a-c	RT [min]	First Scan	Spectrum File	Ions Matched	Ions Score	Identity Strict	Identity Relaxed	Expectation Value	XCorr	Percolator q-Value	Percolator PEP
High	TRUE	Homo sapiens	P04264	Sequest HT (A4)	2.55497	0.00213021	a-c	29.333	4390	A_IyII_1-3.raw	0/0					4.97092	0	0.002953
High	TRUE	Homo sapiens	P04264	Mascot (A2)	2.55497	0.00213021	a-c	29.333	4390	A_IyII_1-3.raw	21/248	42.27	47	40	0.0304319		0	0.002013
THNLEPYFESFINNLRR	High	Homo sapiens	P04264		0.2089		a-c
Confidence	Checked	Homo sapiens	Master Protein Accessions	Identifying Node	DeltaM [ppm]	Deltam/z [Da]	a-c	RT [min]	First Scan	Spectrum File	Ions Matched	Ions Score	Identity Strict	Identity Relaxed	Expectation Value	XCorr	Percolator q-Value	Percolator PEP
High	TRUE	Homo sapiens	P04264	Mascot (A2)	1.14375	0.000614785	a-c	41.2165	6859	A_IyII_1-3.raw	8/184	22.11	47	40	3.17893		0.001533	0.0371
High	TRUE	Homo sapiens	P04264	Sequest HT (A4)	1.14375	0.000614785	a-c	41.2165	6859	A_IyII_1-3.raw	0/0					4.21342	0.005193	0.2089
SLNNQFASFIDKVR	High	Homo sapiens	P04264	1xDeamidated [Q5]	0.803		a-c
Confidence	Checked	Homo sapiens	Master Protein Accessions	Identifying Node	DeltaM [ppm]	Deltam/z [Da]	a-c	RT [min]	First Scan	Spectrum File	Ions Matched	Ions Score	Identity Strict	Identity Relaxed	Expectation Value	XCorr	Percolator q-Value	Percolator PEP
High	TRUE	Homo sapiens	P04264	Mascot (A2)	-5.36037	-0.00293005	a-c	37.1442	6017	A_IyII_1-3.raw	8/148	36.78	46	39	0.0875048		0.001533	0.03571
AEAESLYQSKYEELQITAGR	High	Homo sapiens	P04264		0.0358		a-c
Confidence	Checked	Homo sapiens	Master Protein Accessions	Identifying Node	DeltaM [ppm]	Deltam/z [Da]	a-c	RT [min]	First Scan	Spectrum File	Ions Matched	Ions Score	Identity Strict	Identity Relaxed	Expectation Value	XCorr	Percolator q-Value	Percolator PEP
High	TRUE	Homo sapiens	P04264	Sequest HT (A4)	1.4505	0.00110534	a-c	32.2227	4992	A_IyII_1-3.raw	0/0					3.67681	0	0.0358
LLRDYQELMNTK	High	Homo sapiens	P04264		0.03236		a-c
Confidence	Checked	Homo sapiens	Master Protein Accessions	Identifying Node	DeltaM [ppm]	Deltam/z [Da]	a-c	RT [min]	First Scan	Spectrum File	Ions Matched	Ions Score	Identity Strict	Identity Relaxed	Expectation Value	XCorr	Percolator q-Value	Percolator PEP
High	TRUE	Homo sapiens	P04264	Sequest HT (A4)	0.860949	0.000437302	a-c	29.4059	4405	A_IyII_1-3.raw	0/0					3.54463	0	0.03236
High	TRUE	Homo sapiens	P04264	Mascot (A2)	0.860949	0.000437302	a-c	29.4059	4405	A_IyII_1-3.raw	5/124	21.43	45	38	2.62419		0.002414	0.06271
MSGECAPNVSVSVSTSHTTISGGGSR	High	Homo sapiens	P04264	1xCarbamidomethyl [C5]; 1xOxidation [M1]	0.06894		a-c
Confidence	Checked	Homo sapiens	Master Protein Accessions	Identifying Node	DeltaM [ppm]	Deltam/z [Da]	a-c	RT [min]	First Scan	Spectrum File	Ions Matched	Ions Score	Identity Strict	Identity Relaxed	Expectation Value	XCorr	Percolator q-Value	Percolator PEP
High	TRUE	Homo sapiens	P04264	Sequest HT (A4)	0.524971	0.000451678	a-c	24.9656	3499	A_IyII_1-3.raw	0/0					1.82495	0	0.06894
SISISVAR	High	Homo sapiens	P04264		0.204		a-c
Confidence	Checked	Homo sapiens	Master Protein Accessions	Identifying Node	DeltaM [ppm]	Deltam/z [Da]	a-c	RT [min]	First Scan	Spectrum File	Ions Matched	Ions Score	Identity Strict	Identity Relaxed	Expectation Value	XCorr	Percolator q-Value	Percolator PEP
High	TRUE	Homo sapiens	P04264	Sequest HT (A4)	0.735891	0.000306311	a-c	24.1014	3324	A_IyII_1-3.raw	0/0					2.08212	0.004163	0.204
High	TRUE	Homo sapiens	P04264	Mascot (A2)	0.735891	0.000306311	a-c	24.1014	3324	A_IyII_1-3.raw	7/56	32.87	44	37	0.139226		0.004235	0.1256
MSGECAPNVSVSVSTSHTTISGGGSR	High	Homo sapiens	P04264	1xCarbamidomethyl [C5]	0.1489		a-c
Confidence	Checked	Homo sapiens	Master Protein Accessions	Identifying Node	DeltaM [ppm]	Deltam/z [Da]	a-c	RT [min]	First Scan	Spectrum File	Ions Matched	Ions Score	Identity Strict	Identity Relaxed	Expectation Value	XCorr	Percolator q-Value	Percolator PEP
High	TRUE	Homo sapiens	P04264	Sequest HT (A4)	1.85326	0.00158464	a-c	26.0468	3718	A_IyII_1-3.raw	0/0					2.91813	0.002128	0.1489
High	TRUE	Homo sapiens	P04264	Mascot (A2)	1.85326	0.00158464	a-c	26.0468	3718	A_IyII_1-3.raw	15/272	30.4	44	37	0.239084		0.004235	0.109
Ig mu chain C region OS=Homo sapiens GN=IGHM PE=1 SV=3	P01871	Homo sapiens	49.276	5.75221	46.21	2	a-c
Sequence	Confidence	Homo sapiens	Master Protein Accessions	Modifications	Percolator PEP Sequest HT		a-c
TSQNSELNNMQDLVEDYKK	High	Homo sapiens	P35908		0.007729		a-c
Confidence	Checked	Homo sapiens	Master Protein Accessions	Identifying Node	DeltaM [ppm]	Deltam/z [Da]	a-c	RT [min]	First Scan	Spectrum File	Ions Matched	Ions Score	Identity Strict	Identity Relaxed	Expectation Value	XCorr	Percolator q-Value	Percolator PEP
High	TRUE	Homo sapiens	P35908	Sequest HT (A4)	0.959725	0.000721728	a-c	33.6027	5280	A_IyII_1-3.raw	0/0					5.69146	0	0.007729
High	TRUE	Homo sapiens	P35908	Mascot (A2)	0.959725	0.000721728	a-c	33.6027	5280	A_IyII_1-3.raw	20/208	31.37	44	37	0.208661		0	0.01442
VLYDAEISQIHQSVTDTNVILSMDNSR	High	Homo sapiens	P35908		0.0001651		a-c
Confidence	Checked	Homo sapiens	Master Protein Accessions	Identifying Node	DeltaM [ppm]	Deltam/z [Da]	a-c	RT [min]	First Scan	Spectrum File	Ions Matched	Ions Score	Identity Strict	Identity Relaxed	Expectation Value	XCorr	Percolator q-Value	Percolator PEP
High	TRUE	Homo sapiens	P35908	Sequest HT (A4)	1.5958	0.0016216	a-c	42.7045	7163	A_IyII_1-3.raw	0/0					6.84278	0	0.0001651
High	TRUE	Homo sapiens	P35908	Mascot (A2)	1.5958	0.0016216	a-c	42.7045	7163	A_IyII_1-3.raw	12/280	56.46	47	40	0.00116734		0	7.354e-05
High	TRUE	Homo sapiens	P35908	Sequest HT (A4)	1.05081	0.000800847	a-c	42.6894	7160	A_IyII_1-3.raw	0/0					2.90256	0	0.01073
High	TRUE	Homo sapiens	P35908	Mascot (A2)	1.05081	0.000800847	a-c	42.6894	7160	A_IyII_1-3.raw	21/280	34.66	47	40	0.175213		0	0.002689
VLYDAEISQIHQSVTDTNVILSMDNSR	High	Homo sapiens	P35908	1xOxidation [M23]	6.253e-05		a-c
Confidence	Checked	Homo sapiens	Master Protein Accessions	Identifying Node	DeltaM [ppm]	Deltam/z [Da]	a-c	RT [min]	First Scan	Spectrum File	Ions Matched	Ions Score	Identity Strict	Identity Relaxed	Expectation Value	XCorr	Percolator q-Value	Percolator PEP
High	TRUE	Homo sapiens	P35908	Mascot (A2)	0.418599	0.000427598	a-c	40.1324	6636	A_IyII_1-3.raw	23/280	63.24	47	40	0.000238947		0	0.0002042
High	TRUE	Homo sapiens	P35908	Sequest HT (A4)	0.418599	0.000427598	a-c	40.1324	6636	A_IyII_1-3.raw	0/0					7.31212	0	6.253e-05
GGGFGGGSSFGGGSGFSGGGFGGGGFGGGR	High	Homo sapiens	P35908		1.15714e-06		a-c
Confidence	Checked	Homo sapiens	Master Protein Accessions	Identifying Node	DeltaM [ppm]	Deltam/z [Da]	a-c	RT [min]	First Scan	Spectrum File	Ions Matched	Ions Score	Identity Strict	Identity Relaxed	Expectation Value	XCorr	Percolator q-Value	Percolator PEP
High	TRUE	Homo sapiens	P35908	Sequest HT (A4)	1.49978	0.00119933	a-c	37.9443	6184	A_IyII_1-3.raw	0/0					8.60759	0	1.15714e-06
High	TRUE	Homo sapiens	P35908	Mascot (A2)	1.49978	0.00119933	a-c	37.9443	6184	A_IyII_1-3.raw	33/232	76.4	38	31	1.77313e-06		0	2.21778e-07
NVQDAIADAEQR	High	Homo sapiens	P35908		0.006408		a-c
Confidence	Checked	Homo sapiens	Master Protein Accessions	Identifying Node	DeltaM [ppm]	Deltam/z [Da]	a-c	RT [min]	First Scan	Spectrum File	Ions Matched	Ions Score	Identity Strict	Identity Relaxed	Expectation Value	XCorr	Percolator q-Value	Percolator PEP
High	TRUE	Homo sapiens	P35908	Mascot (A2)	1.00788	0.000670059	a-c	27.4543	4004	A_IyII_1-3.raw	10/132	75.99	43	36	5.59805e-06		0	0.0005161
High	TRUE	Homo sapiens	P35908	Sequest HT (A4)	1.00788	0.000670059	a-c	27.4543	4004	A_IyII_1-3.raw	0/0					4.30865	0	0.006408
NKLNDLEEALQQAKEDLAR	High	Homo sapiens	P35908		0.0001799		a-c
Confidence	Checked	Homo sapiens	Master Protein Accessions	Identifying Node	DeltaM [ppm]	Deltam/z [Da]	a-c	RT [min]	First Scan	Spectrum File	Ions Matched	Ions Score	Identity Strict	Identity Relaxed	Expectation Value	XCorr	Percolator q-Value	Percolator PEP
High	TRUE	Homo sapiens	P35908	Sequest HT (A4)	0.776428	0.000568899	a-c	41.2985	6875	A_IyII_1-3.raw	0/0					6.88257	0	0.0001799
High	TRUE	Homo sapiens	P35908	Mascot (A2)	0.776428	0.000568899	a-c	41.2985	6875	A_IyII_1-3.raw	18/216	49.1	46	39	0.00532583		0	0.0005961
High	TRUE	Homo sapiens	P35908	Sequest HT (A4)	1.27011	0.000697971	a-c	41.288	6873	A_IyII_1-3.raw	0/0					4.079	0	0.06884
High	TRUE	Homo sapiens	P35908	Mascot (A2)	1.27011	0.000697971	a-c	41.288	6873	A_IyII_1-3.raw	13/216	15.24	46	39	12.8144		0.002414	0.08712
NVQDAIADAEQRGEHALK	High	Homo sapiens	P35908		0.06265		a-c
Confidence	Checked	Homo sapiens	Master Protein Accessions	Identifying Node	DeltaM [ppm]	Deltam/z [Da]	a-c	RT [min]	First Scan	Spectrum File	Ions Matched	Ions Score	Identity Strict	Identity Relaxed	Expectation Value	XCorr	Percolator q-Value	Percolator PEP
High	TRUE	Homo sapiens	P35908	Sequest HT (A4)	1.08007	0.000707436	a-c	31.8563	4915	A_IyII_1-3.raw	0/0					2.185	0	0.06265
High	TRUE	Homo sapiens	P35908	Mascot (A2)	1.16641	0.000572992	a-c	31.9119	4927	A_IyII_1-3.raw	9/204	18.98	46	39	6.06694		0.001533	0.03388
High	TRUE	Homo sapiens	P35908	Mascot (A2)	1.08007	0.000707436	a-c	31.8563	4915	A_IyII_1-3.raw	10/204	15.25	46	39	14.3		0.004235	0.1555
NVQDAIADAEQRGEHALKDAR	High	Homo sapiens	P35908		0.03736		a-c
Confidence	Checked	Homo sapiens	Master Protein Accessions	Identifying Node	DeltaM [ppm]	Deltam/z [Da]	a-c	RT [min]	First Scan	Spectrum File	Ions Matched	Ions Score	Identity Strict	Identity Relaxed	Expectation Value	XCorr	Percolator q-Value	Percolator PEP
High	TRUE	Homo sapiens	P35908	Sequest HT (A4)	1.09641	0.000632395	a-c	33.3323	5223	A_IyII_1-3.raw	0/0					4.25587	0	0.03736
High	TRUE	Homo sapiens	P35908	Mascot (A2)	1.09641	0.000632395	a-c	33.3323	5223	A_IyII_1-3.raw	10/240	10.96	47	40	40.5649		0.002414	0.08315
FGGFGGPGGVGGLGGPGGFGPGGYPGGIHEVSVNQSLLQPLNVK	High	Homo sapiens	P35908	1xDeamidated [N34]	0.1212		a-c
Confidence	Checked	Homo sapiens	Master Protein Accessions	Identifying Node	DeltaM [ppm]	Deltam/z [Da]	a-c	RT [min]	First Scan	Spectrum File	Ions Matched	Ions Score	Identity Strict	Identity Relaxed	Expectation Value	XCorr	Percolator q-Value	Percolator PEP
High	TRUE	Homo sapiens	P35908	Sequest HT (A4)	6.11947	0.00626183	a-c	60.5555	10756	A_IyII_1-3.raw	0/0					5.39528	0.001107	0.1212
DVDNAYMIK	High	Homo sapiens	P35908	1xOxidation [M7]	0.1511		a-c
Confidence	Checked	Homo sapiens	Master Protein Accessions	Identifying Node	DeltaM [ppm]	Deltam/z [Da]	a-c	RT [min]	First Scan	Spectrum File	Ions Matched	Ions Score	Identity Strict	Identity Relaxed	Expectation Value	XCorr	Percolator q-Value	Percolator PEP
High	TRUE	Homo sapiens	P35908	Sequest HT (A4)	0.932999	0.000505918	a-c	24.2376	3352	A_IyII_1-3.raw	0/0					2.91706	0.002128	0.1511
TAAENDFVTLK	High	Homo sapiens	P35908		0.4934		a-c
Confidence	Checked	Homo sapiens	Master Protein Accessions	Identifying Node	DeltaM [ppm]	Deltam/z [Da]	a-c	RT [min]	First Scan	Spectrum File	Ions Matched	Ions Score	Identity Strict	Identity Relaxed	Expectation Value	XCorr	Percolator q-Value	Percolator PEP
High	TRUE	Homo sapiens	P35908	Mascot (A2)	0.729063	0.000440579	a-c	28.3248	4182	A_IyII_1-3.raw	7/104	47.79	45	38	0.00594337		0.004235	0.1458
Sequence	Confidence	Homo sapiens	Master Protein Accessions	Modifications	Percolator PEP Sequest HT		a-c
DVDAAYMNKVELEAK	High	Homo sapiens	Q6P6Q2; Q5XQN5		0.01268		a-c
Confidence	Checked	Homo sapiens	Master Protein Accessions	Identifying Node	DeltaM [ppm]	Deltam/z [Da]	a-c	RT [min]	First Scan	Spectrum File	Ions Matched	Ions Score	Identity Strict	Identity Relaxed	Expectation Value	XCorr	Percolator q-Value	Percolator PEP
High	TRUE	Homo sapiens	Q6P6Q2; Q5XQN5	Sequest HT (A4)	0.627974	0.000354978	a-c	30.3499	4599	A_IyII_1-3.raw	0/0					3.8143	0	0.01268
High	TRUE	Homo sapiens	Q6P6Q2; Q5XQN5	Mascot (A2)	0.627974	0.000354978	a-c	30.3499	4599	A_IyII_1-3.raw	12/140	30.58	46	39	0.35065		0	0.01273
SLDLDSIIAEVK	High	Homo sapiens	P04264; P50446; Q6P6Q2; Q5XQN5		0.01304		a-c
Confidence	Checked	Homo sapiens	Master Protein Accessions	Identifying Node	DeltaM [ppm]	Deltam/z [Da]	a-c	RT [min]	First Scan	Spectrum File	Ions Matched	Ions Score	Identity Strict	Identity Relaxed	Expectation Value	XCorr	Percolator q-Value	Percolator PEP
High	TRUE	Homo sapiens	P04264; P50446; Q6P6Q2; Q5XQN5	Sequest HT (A4)	1.32129	0.000860632	a-c	58.5925	10359	A_IyII_1-3.raw	0/0					2.3961	0	0.09174
High	TRUE	Homo sapiens	P04264; P50446; Q6P6Q2; Q5XQN5	Mascot (A2)	1.22758	0.000799597	a-c	52.338	9114	A_IyII_1-3.raw	8/88	67.52	45	38	7.02999e-05		0	0.002653
High	TRUE	Homo sapiens	P04264; P50446; Q6P6Q2; Q5XQN5	Sequest HT (A4)	1.22758	0.000799597	a-c	52.338	9114	A_IyII_1-3.raw	0/0					4.72271	0	0.01304
High	TRUE	Homo sapiens	P04264; P50446; Q6P6Q2; Q5XQN5	Mascot (A2)	0.946471	0.000616491	a-c	58.463	10333	A_IyII_1-3.raw	8/88	28.91	45	39	0.510516		0.004235	0.1298
SFSTASAITPSVSR	High	Homo sapiens	Q5XQN5		0.08515		a-c
Confidence	Checked	Homo sapiens	Master Protein Accessions	Identifying Node	DeltaM [ppm]	Deltam/z [Da]	a-c	RT [min]	First Scan	Spectrum File	Ions Matched	Ions Score	Identity Strict	Identity Relaxed	Expectation Value	XCorr	Percolator q-Value	Percolator PEP
High	TRUE	Homo sapiens	Q5XQN5	Sequest HT (A4)	1.73332	0.00122262	a-c	27.8068	4076	A_IyII_1-3.raw	0/0					2.86571	0	0.08515
High	TRUE	Homo sapiens	Q5XQN5	Mascot (A2)	1.73332	0.00122262	a-c	27.8068	4076	A_IyII_1-3.raw	8/104	34.8	45	38	0.1153		0.001533	0.03773
EYQELMNTK	High	Homo sapiens	Q6P6Q2; Q5XQN5		0.142		a-c
Confidence	Checked	Homo sapiens	Master Protein Accessions	Identifying Node	DeltaM [ppm]	Deltam/z [Da]	a-c	RT [min]	First Scan	Spectrum File	Ions Matched	Ions Score	Identity Strict	Identity Relaxed	Expectation Value	XCorr	Percolator q-Value	Percolator PEP
High	TRUE	Homo sapiens	Q6P6Q2; Q5XQN5	Sequest HT (A4)	0.766563	0.000442895	a-c	23.7653	3256	A_IyII_1-3.raw	0/0					1.63265	0.001107	0.142
High	TRUE	Homo sapiens	Q6P6Q2; Q5XQN5	Mascot (A2)	0.766563	0.000442895	a-c	23.7653	3256	A_IyII_1-3.raw	5/88	18.07	42	35	2.70894		0.008205	0.2049
TEAESWYQTK	High	Homo sapiens	Q6P6Q2; Q5XQN5		0.1327		a-c
Confidence	Checked	Homo sapiens	Master Protein Accessions	Identifying Node	DeltaM [ppm]	Deltam/z [Da]	a-c	RT [min]	First Scan	Spectrum File	Ions Matched	Ions Score	Identity Strict	Identity Relaxed	Expectation Value	XCorr	Percolator q-Value	Percolator PEP
High	TRUE	Homo sapiens	Q6P6Q2; Q5XQN5	Sequest HT (A4)	1.22741	0.000762568	a-c	24.1655	3337	A_IyII_1-3.raw	0/0					2.19927	0.001107	0.1327
High	TRUE	Homo sapiens	Q6P6Q2; Q5XQN5	Mascot (A2)	1.22741	0.000762568	a-c	24.1655	3337	A_IyII_1-3.raw	4/80	20.47	41	34	1.21646		0.004235	0.1183
Ovostatin homolog 2 OS=Homo sapiens GN=OVOS2 PE=2 SV=2	Q6IE36	Homo sapiens	161.149	3.91061	32.3	2	a-c
Sequence	Confidence	Homo sapiens	Master Protein Accessions	Modifications	Percolator PEP Sequest HT		a-c
FLEQQNKVLDTKWTLLQEQGTK	High	Homo sapiens	Q6P6Q2		0.00734		a-c
Confidence	Checked	Homo sapiens	Master Protein Accessions	Identifying Node	DeltaM [ppm]	Deltam/z [Da]	a-c	RT [min]	First Scan	Spectrum File	Ions Matched	Ions Score	Identity Strict	Identity Relaxed	Expectation Value	XCorr	Percolator q-Value	Percolator PEP
High	TRUE	Homo sapiens	Q6P6Q2	Mascot (A2)	1.87714	0.00124239	a-c	34.7008	5509	A_IyII_1-3.raw	8/240	48.06	44	37	0.00487389		0	0.0007709
High	TRUE	Homo sapiens	Q6P6Q2	Sequest HT (A4)	1.87714	0.00124239	a-c	34.7008	5509	A_IyII_1-3.raw	0/0					4.34414	0	0.00734
DVDAAYMNKVELEAK	High	Homo sapiens	Q6P6Q2; Q5XQN5		0.01268		a-c
Confidence	Checked	Homo sapiens	Master Protein Accessions	Identifying Node	DeltaM [ppm]	Deltam/z [Da]	a-c	RT [min]	First Scan	Spectrum File	Ions Matched	Ions Score	Identity Strict	Identity Relaxed	Expectation Value	XCorr	Percolator q-Value	Percolator PEP
High	TRUE	Homo sapiens	Q6P6Q2; Q5XQN5	Sequest HT (A4)	0.627974	0.000354978	a-c	30.3499	4599	A_IyII_1-3.raw	0/0					3.8143	0	0.01268
High	TRUE	Homo sapiens	Q6P6Q2; Q5XQN5	Mascot (A2)	0.627974	0.000354978	a-c	30.3499	4599	A_IyII_1-3.raw	12/140	30.58	46	39	0.35065		0	0.01273
SLDLDSIIAEVK	High	Homo sapiens	P04264; P50446; Q6P6Q2; Q5XQN5		0.01304		a-c
Confidence	Checked	Homo sapiens	Master Protein Accessions	Identifying Node	DeltaM [ppm]	Deltam/z [Da]	a-c	RT [min]	First Scan	Spectrum File	Ions Matched	Ions Score	Identity Strict	Identity Relaxed	Expectation Value	XCorr	Percolator q-Value	Percolator PEP
High	TRUE	Homo sapiens	P04264; P50446; Q6P6Q2; Q5XQN5	Sequest HT (A4)	1.32129	0.000860632	a-c	58.5925	10359	A_IyII_1-3.raw	0/0					2.3961	0	0.09174
High	TRUE	Homo sapiens	P04264; P50446; Q6P6Q2; Q5XQN5	Mascot (A2)	1.22758	0.000799597	a-c	52.338	9114	A_IyII_1-3.raw	8/88	67.52	45	38	7.02999e-05		0	0.002653
High	TRUE	Homo sapiens	P04264; P50446; Q6P6Q2; Q5XQN5	Sequest HT (A4)	1.22758	0.000799597	a-c	52.338	9114	A_IyII_1-3.raw	0/0					4.72271	0	0.01304
High	TRUE	Homo sapiens	P04264; P50446; Q6P6Q2; Q5XQN5	Mascot (A2)	0.946471	0.000616491	a-c	58.463	10333	A_IyII_1-3.raw	8/88	28.91	45	39	0.510516		0.004235	0.1298
EYQELMNTK	High	Homo sapiens	Q6P6Q2; Q5XQN5		0.142		a-c
Confidence	Checked	Homo sapiens	Master Protein Accessions	Identifying Node	DeltaM [ppm]	Deltam/z [Da]	a-c	RT [min]	First Scan	Spectrum File	Ions Matched	Ions Score	Identity Strict	Identity Relaxed	Expectation Value	XCorr	Percolator q-Value	Percolator PEP
High	TRUE	Homo sapiens	Q6P6Q2; Q5XQN5	Sequest HT (A4)	0.766563	0.000442895	a-c	23.7653	3256	A_IyII_1-3.raw	0/0					1.63265	0.001107	0.142
High	TRUE	Homo sapiens	Q6P6Q2; Q5XQN5	Mascot (A2)	0.766563	0.000442895	a-c	23.7653	3256	A_IyII_1-3.raw	5/88	18.07	42	35	2.70894		0.008205	0.2049
TEAESWYQTK	High	Homo sapiens	Q6P6Q2; Q5XQN5		0.1327		a-c
Confidence	Checked	Homo sapiens	Master Protein Accessions	Identifying Node	DeltaM [ppm]	Deltam/z [Da]	a-c	RT [min]	First Scan	Spectrum File	Ions Matched	Ions Score	Identity Strict	Identity Relaxed	Expectation Value	XCorr	Percolator q-Value	Percolator PEP
High	TRUE	Homo sapiens	Q6P6Q2; Q5XQN5	Sequest HT (A4)	1.22741	0.000762568	a-c	24.1655	3337	A_IyII_1-3.raw	0/0					2.19927	0.001107	0.1327
High	TRUE	Homo sapiens	Q6P6Q2; Q5XQN5	Mascot (A2)	1.22741	0.000762568	a-c	24.1655	3337	A_IyII_1-3.raw	4/80	20.47	41	34	1.21646		0.004235	0.1183
Protein disulfide-isomerase A3 OS=Homo sapiens GN=PDIA3 PE=1 SV=4	P30101	Homo sapiens	56.747	7.72277	24.69	2	a-c
Sequence	Confidence	Homo sapiens	Master Protein Accessions	Modifications	Percolator PEP Sequest HT		a-c
FLEQQNKVLETKWTLLQEQGTK	High	Homo sapiens	P02538		0.008455		a-c
Confidence	Checked	Homo sapiens	Master Protein Accessions	Identifying Node	DeltaM [ppm]	Deltam/z [Da]	a-c	RT [min]	First Scan	Spectrum File	Ions Matched	Ions Score	Identity Strict	Identity Relaxed	Expectation Value	XCorr	Percolator q-Value	Percolator PEP
High	TRUE	Homo sapiens	P02538	Mascot (A2)	0.481846	0.000320599	a-c	34.7442	5518	A_IyII_1-3.raw	6/240	19.23	44	37	3.64584		0	0.02404
High	TRUE	Homo sapiens	P02538	Sequest HT (A4)	0.481846	0.000320599	a-c	34.7442	5518	A_IyII_1-3.raw	0/0					4.12325	0	0.008455
ALYDAELSQMQTHISDTSVVLSMDNNR	High	Homo sapiens	P02538	1xOxidation [M23]	0.01466		a-c
Confidence	Checked	Homo sapiens	Master Protein Accessions	Identifying Node	DeltaM [ppm]	Deltam/z [Da]	a-c	RT [min]	First Scan	Spectrum File	Ions Matched	Ions Score	Identity Strict	Identity Relaxed	Expectation Value	XCorr	Percolator q-Value	Percolator PEP
High	TRUE	Homo sapiens	P02538	Mascot (A2)	-0.2829	-0.000288031	a-c	40.5609	6725	A_IyII_1-3.raw	12/280	27.46	44	37	0.561393		0	0.01572
High	TRUE	Homo sapiens	P02538	Sequest HT (A4)	-0.2829	-0.000288031	a-c	40.5609	6725	A_IyII_1-3.raw	0/0					4.65558	0	0.01466
ALYDAELSQMQTHISDTSVVLSMDNNR	High	Homo sapiens	P02538		0.003169		a-c
Confidence	Checked	Homo sapiens	Master Protein Accessions	Identifying Node	DeltaM [ppm]	Deltam/z [Da]	a-c	RT [min]	First Scan	Spectrum File	Ions Matched	Ions Score	Identity Strict	Identity Relaxed	Expectation Value	XCorr	Percolator q-Value	Percolator PEP
High	TRUE	Homo sapiens	P02538	Sequest HT (A4)	1.7382	0.00176046	a-c	42.9264	7209	A_IyII_1-3.raw	0/0					5.58184	0	0.003169
High	TRUE	Homo sapiens	P02538	Mascot (A2)	1.7382	0.00176046	a-c	42.9264	7209	A_IyII_1-3.raw	17/280	40.09	45	38	0.0373969		0	0.01174
QNLEPLFEQYINNLR	High	Homo sapiens	P02538		0.004236		a-c
Confidence	Checked	Homo sapiens	Master Protein Accessions	Identifying Node	DeltaM [ppm]	Deltam/z [Da]	a-c	RT [min]	First Scan	Spectrum File	Ions Matched	Ions Score	Identity Strict	Identity Relaxed	Expectation Value	XCorr	Percolator q-Value	Percolator PEP
High	TRUE	Homo sapiens	P02538	Mascot (A2)	0.754103	0.000475329	a-c	60.3335	10711	A_IyII_1-3.raw	18/168	31.93	46	39	0.315732		0	0.002989
High	TRUE	Homo sapiens	P02538	Sequest HT (A4)	0.754103	0.000475329	a-c	60.3335	10711	A_IyII_1-3.raw	0/0					3.32229	0	0.004236
GSGGLGGACGGAGFGSR	High	Homo sapiens	P02538	1xCarbamidomethyl [C9]	0.03009		a-c
Confidence	Checked	Homo sapiens	Master Protein Accessions	Identifying Node	DeltaM [ppm]	Deltam/z [Da]	a-c	RT [min]	First Scan	Spectrum File	Ions Matched	Ions Score	Identity Strict	Identity Relaxed	Expectation Value	XCorr	Percolator q-Value	Percolator PEP
High	TRUE	Homo sapiens	P02538	Mascot (A2)	0.982269	0.000699687	a-c	23.2484	3152	A_IyII_1-3.raw	9/128	50.62	41	34	0.00122979		0	0.01325
High	TRUE	Homo sapiens	P02538	Sequest HT (A4)	0.982269	0.000699687	a-c	23.2484	3152	A_IyII_1-3.raw	0/0					2.86808	0	0.03009
SRAEAESWYQTKYEELQVTAGR	High	Homo sapiens	P02538; P50446		0.00549		a-c
Confidence	Checked	Homo sapiens	Master Protein Accessions	Identifying Node	DeltaM [ppm]	Deltam/z [Da]	a-c	RT [min]	First Scan	Spectrum File	Ions Matched	Ions Score	Identity Strict	Identity Relaxed	Expectation Value	XCorr	Percolator q-Value	Percolator PEP
High	TRUE	Homo sapiens	P02538; P50446	Sequest HT (A4)	2.15352	0.001868	a-c	31.0751	4751	A_IyII_1-3.raw	0/0					3.89779	0	0.00549
High	TRUE	Homo sapiens	P02538; P50446	Mascot (A2)	2.15352	0.001868	a-c	31.0751	4751	A_IyII_1-3.raw	10/248	29.7	46	39	0.492952		0	0.006101
DVDAAYMNKVELQAK	High	Homo sapiens	P02538; P50446	1xDeamidated [N/Q]	0.2005		a-c
Confidence	Checked	Homo sapiens	Master Protein Accessions	Identifying Node	DeltaM [ppm]	Deltam/z [Da]	a-c	RT [min]	First Scan	Spectrum File	Ions Matched	Ions Score	Identity Strict	Identity Relaxed	Expectation Value	XCorr	Percolator q-Value	Percolator PEP
High	TRUE	Homo sapiens	P02538; P50446	Mascot (A2)	0.62772	0.000354835	a-c	30.3499	4599	A_IyII_1-3.raw	12/140	30.58	46	39	0.35065		0	0.01273
High	TRUE	Homo sapiens	P02538; P50446	Sequest HT (A4)	0.62772	0.000354835	a-c	30.3499	4599	A_IyII_1-3.raw	0/0					3.63552	0.004163	0.2005
FLEQQNKVLETK	High	Homo sapiens	P02538; Q8N1N4				a-c
Confidence	Checked	Homo sapiens	Master Protein Accessions	Identifying Node	DeltaM [ppm]	Deltam/z [Da]	a-c	RT [min]	First Scan	Spectrum File	Ions Matched	Ions Score	Identity Strict	Identity Relaxed	Expectation Value	XCorr	Percolator q-Value	Percolator PEP
High	TRUE	Homo sapiens	P02538; Q8N1N4	Mascot (A2)	0.412064	0.000202846	a-c	23.2084	3144	A_IyII_1-3.raw	11/120	22.07	45	38	2.38755		0.001533	0.03133
TAAENEFVTLKK	High	Homo sapiens	P02538; P50446		0.09268		a-c
Confidence	Checked	Homo sapiens	Master Protein Accessions	Identifying Node	DeltaM [ppm]	Deltam/z [Da]	a-c	RT [min]	First Scan	Spectrum File	Ions Matched	Ions Score	Identity Strict	Identity Relaxed	Expectation Value	XCorr	Percolator q-Value	Percolator PEP
High	TRUE	Homo sapiens	P02538; P50446	Sequest HT (A4)	0.910659	0.000615026	a-c	23.1788	3138	A_IyII_1-3.raw	0/0					2.73621	0	0.09268
High	TRUE	Homo sapiens	P02538; P50446	Mascot (A2)	0.910659	0.000615026	a-c	23.1788	3138	A_IyII_1-3.raw	8/116	39.14	45	38	0.0389833		0.002414	0.06128
AEAESWYQTK	High	Homo sapiens	P02538; P50446		0.05091		a-c
Confidence	Checked	Homo sapiens	Master Protein Accessions	Identifying Node	DeltaM [ppm]	Deltam/z [Da]	a-c	RT [min]	First Scan	Spectrum File	Ions Matched	Ions Score	Identity Strict	Identity Relaxed	Expectation Value	XCorr	Percolator q-Value	Percolator PEP
High	TRUE	Homo sapiens	P02538; P50446	Sequest HT (A4)	0.306004	0.000185523	a-c	23.8552	3274	A_IyII_1-3.raw	0/0					2.9998	0	0.05091
High	TRUE	Homo sapiens	P02538; P50446	Mascot (A2)	0.306004	0.000185523	a-c	23.8552	3274	A_IyII_1-3.raw	5/80	35.74	42	35	0.0433898		0.002414	0.0399
EYQELMNVK	High	Homo sapiens	P02538; P50446		0.2877		a-c
Confidence	Checked	Homo sapiens	Master Protein Accessions	Identifying Node	DeltaM [ppm]	Deltam/z [Da]	a-c	RT [min]	First Scan	Spectrum File	Ions Matched	Ions Score	Identity Strict	Identity Relaxed	Expectation Value	XCorr	Percolator q-Value	Percolator PEP
High	TRUE	Homo sapiens	P02538; P50446	Mascot (A2)	0.887997	0.000512177	a-c	27.3601	3985	A_IyII_1-3.raw	6/88	28.41	43	36	0.358366		0.003589	0.09626
Sequence	Confidence	Homo sapiens	Master Protein Accessions	Modifications	Percolator PEP Sequest HT		a-c
TLNNQFASFIDKVR	High	Homo sapiens	Q8N1N4		0.01181		a-c
Confidence	Checked	Homo sapiens	Master Protein Accessions	Identifying Node	DeltaM [ppm]	Deltam/z [Da]	a-c	RT [min]	First Scan	Spectrum File	Ions Matched	Ions Score	Identity Strict	Identity Relaxed	Expectation Value	XCorr	Percolator q-Value	Percolator PEP
High	TRUE	Homo sapiens	Q8N1N4	Sequest HT (A4)	1.20711	0.00066507	a-c	36.9567	5978	A_IyII_1-3.raw	0/0					3.56119	0	0.01181
High	TRUE	Homo sapiens	Q8N1N4	Mascot (A2)	1.20711	0.00066507	a-c	36.9567	5978	A_IyII_1-3.raw	9/148	28.05	45	38	0.517968		0	0.01689
YLDFSSIITEVR	High	Homo sapiens	Q8N1N4		0.005892		a-c
Confidence	Checked	Homo sapiens	Master Protein Accessions	Identifying Node	DeltaM [ppm]	Deltam/z [Da]	a-c	RT [min]	First Scan	Spectrum File	Ions Matched	Ions Score	Identity Strict	Identity Relaxed	Expectation Value	XCorr	Percolator q-Value	Percolator PEP
High	TRUE	Homo sapiens	Q8N1N4	Sequest HT (A4)	0.873641	0.000630224	a-c	52.9206	9232	A_IyII_1-3.raw	0/0					4.61662	0	0.005892
High	TRUE	Homo sapiens	Q8N1N4	Mascot (A2)	0.873641	0.000630224	a-c	52.9206	9232	A_IyII_1-3.raw	9/88	63.85	45	38	0.000138733		0	0.0009333
FLEQQNKVLETK	High	Homo sapiens	P02538; Q8N1N4				a-c
Confidence	Checked	Homo sapiens	Master Protein Accessions	Identifying Node	DeltaM [ppm]	Deltam/z [Da]	a-c	RT [min]	First Scan	Spectrum File	Ions Matched	Ions Score	Identity Strict	Identity Relaxed	Expectation Value	XCorr	Percolator q-Value	Percolator PEP
High	TRUE	Homo sapiens	P02538; Q8N1N4	Mascot (A2)	0.412064	0.000202846	a-c	23.2084	3144	A_IyII_1-3.raw	11/120	22.07	45	38	2.38755		0.001533	0.03133
Sequence	Confidence	Homo sapiens	Master Protein Accessions	Modifications	Percolator PEP Sequest HT		a-c
GRVGPLLACLLGK	High	Homo sapiens	P22079	1xCarbamidomethyl [C9]	0.02684		a-c
Confidence	Checked	Homo sapiens	Master Protein Accessions	Identifying Node	DeltaM [ppm]	Deltam/z [Da]	a-c	RT [min]	First Scan	Spectrum File	Ions Matched	Ions Score	Identity Strict	Identity Relaxed	Expectation Value	XCorr	Percolator q-Value	Percolator PEP
High	TRUE	Homo sapiens	P22079	Sequest HT (A4)	0.765737	0.000345552	a-c	36.8516	5956	A_IyII_1-3.raw	0/0					4.32629	0	0.02684
High	TRUE	Homo sapiens	P22079	Mascot (A2)	0.765737	0.000345552	a-c	36.8516	5956	A_IyII_1-3.raw	8/140	39.96	40	33	0.010254		0	0.006387
IVGYLNEEGVLDQNR	High	Homo sapiens	P22079		0.001524		a-c
Confidence	Checked	Homo sapiens	Master Protein Accessions	Identifying Node	DeltaM [ppm]	Deltam/z [Da]	a-c	RT [min]	First Scan	Spectrum File	Ions Matched	Ions Score	Identity Strict	Identity Relaxed	Expectation Value	XCorr	Percolator q-Value	Percolator PEP
High	TRUE	Homo sapiens	P22079	Mascot (A2)	0.773241	0.000664551	a-c	34.2219	5409	A_IyII_1-3.raw	9/148	87.07	46	39	9.68035e-07		0	0.0003097
High	TRUE	Homo sapiens	P22079	Sequest HT (A4)	0.773241	0.000664551	a-c	34.2219	5409	A_IyII_1-3.raw	0/0					5.39736	0	0.001524
AQCDEYCIQGDNCFPIMFPPNDPK	High	Homo sapiens	P22079	3xCarbamidomethyl [C3; C7; C13]	0.009099		a-c
Confidence	Checked	Homo sapiens	Master Protein Accessions	Identifying Node	DeltaM [ppm]	Deltam/z [Da]	a-c	RT [min]	First Scan	Spectrum File	Ions Matched	Ions Score	Identity Strict	Identity Relaxed	Expectation Value	XCorr	Percolator q-Value	Percolator PEP
High	TRUE	Homo sapiens	P22079	Sequest HT (A4)	1.2717	0.00123619	a-c	43.0051	7225	A_IyII_1-3.raw	0/0					5.04963	0	0.009099
High	TRUE	Homo sapiens	P22079	Mascot (A2)	1.2717	0.00123619	a-c	43.0051	7225	A_IyII_1-3.raw	15/272	25.76	35	28	0.104061		0	0.01411
VGPLLACLLGKQFQQIR	High	Homo sapiens	P22079	1xCarbamidomethyl [C7]	0.0005681		a-c
Confidence	Checked	Homo sapiens	Master Protein Accessions	Identifying Node	DeltaM [ppm]	Deltam/z [Da]	a-c	RT [min]	First Scan	Spectrum File	Ions Matched	Ions Score	Identity Strict	Identity Relaxed	Expectation Value	XCorr	Percolator q-Value	Percolator PEP
High	TRUE	Homo sapiens	P22079	Sequest HT (A4)	0.731094	0.000473044	a-c	42.9215	7208	A_IyII_1-3.raw	0/0					5.98308	0	0.0005681
High	TRUE	Homo sapiens	P22079	Mascot (A2)	0.731094	0.000473044	a-c	42.9215	7208	A_IyII_1-3.raw	22/152	43.35	40	33	0.00503995		0	0.0009931
KILGAFVQIITFR	High	Homo sapiens	P22079		0.03168		a-c
Confidence	Checked	Homo sapiens	Master Protein Accessions	Identifying Node	DeltaM [ppm]	Deltam/z [Da]	a-c	RT [min]	First Scan	Spectrum File	Ions Matched	Ions Score	Identity Strict	Identity Relaxed	Expectation Value	XCorr	Percolator q-Value	Percolator PEP
High	TRUE	Homo sapiens	P22079	Sequest HT (A4)	0.719479	0.000361159	a-c	42.3511	7091	A_IyII_1-3.raw	0/0					3.93255	0	0.03168
High	TRUE	Homo sapiens	P22079	Mascot (A2)	0.719479	0.000361159	a-c	42.3511	7091	A_IyII_1-3.raw	14/144	41.51	33	26	0.00159275		0	0.005303
ILGAFVQIITFR	High	Homo sapiens	P22079		0.008885		a-c
Confidence	Checked	Homo sapiens	Master Protein Accessions	Identifying Node	DeltaM [ppm]	Deltam/z [Da]	a-c	RT [min]	First Scan	Spectrum File	Ions Matched	Ions Score	Identity Strict	Identity Relaxed	Expectation Value	XCorr	Percolator q-Value	Percolator PEP
High	TRUE	Homo sapiens	P22079	Mascot (A2)	0.856955	0.000590367	a-c	62.1521	11077	A_IyII_1-3.raw	7/108	55.45	36	29	0.000137989		0	0.006729
High	TRUE	Homo sapiens	P22079	Sequest HT (A4)	0.856955	0.000590367	a-c	62.1521	11077	A_IyII_1-3.raw	0/0					2.98552	0	0.05514
High	TRUE	Homo sapiens	P22079	Sequest HT (A4)	1.38853	0.000956578	a-c	60.5854	10762	A_IyII_1-3.raw	0/0					4.33538	0	0.008885
High	TRUE	Homo sapiens	P22079	Mascot (A2)	1.38853	0.000956578	a-c	60.5854	10762	A_IyII_1-3.raw	10/108	76.58	36	29	1.05607e-06		0	0.0001812
High	TRUE	Homo sapiens	P22079	Sequest HT (A4)	0.227021	0.000104265	a-c	60.9712	10839	A_IyII_1-3.raw	0/0					2.24065	0	0.06191
LDENYQPWGPEPELPLHTLFFNTWR	High	Homo sapiens	P22079		0.01445		a-c
Confidence	Checked	Homo sapiens	Master Protein Accessions	Identifying Node	DeltaM [ppm]	Deltam/z [Da]	a-c	RT [min]	First Scan	Spectrum File	Ions Matched	Ions Score	Identity Strict	Identity Relaxed	Expectation Value	XCorr	Percolator q-Value	Percolator PEP
High	TRUE	Homo sapiens	P22079	Sequest HT (A4)	1.03733	0.00107174	a-c	70.9669	12858	A_IyII_1-3.raw	0/0					3.01299	0	0.01445
High	TRUE	Homo sapiens	P22079	Mascot (A2)	1.03733	0.00107174	a-c	70.9669	12858	A_IyII_1-3.raw	11/276	22.3	46	39	2.92214		0	0.02065
SLLFMQWGQIVDHDLDFAPDTELGSSEYSK	High	Homo sapiens	P22079	1xOxidation [M5]	0.002465		a-c
Confidence	Checked	Homo sapiens	Master Protein Accessions	Identifying Node	DeltaM [ppm]	Deltam/z [Da]	a-c	RT [min]	First Scan	Spectrum File	Ions Matched	Ions Score	Identity Strict	Identity Relaxed	Expectation Value	XCorr	Percolator q-Value	Percolator PEP
High	TRUE	Homo sapiens	P22079	Sequest HT (A4)	1.36454	0.00156676	a-c	65.9811	11849	A_IyII_1-3.raw	0/0					4.60495	0	0.002465
High	TRUE	Homo sapiens	P22079	Mascot (A2)	1.36454	0.00156676	a-c	65.9811	11849	A_IyII_1-3.raw	23/328	31.97	45	38	0.210835		0	0.005605
WLPAEYEDGLSLPFGWTPGK	High	Homo sapiens	P22079		0.0003912		a-c
Confidence	Checked	Homo sapiens	Master Protein Accessions	Identifying Node	DeltaM [ppm]	Deltam/z [Da]	a-c	RT [min]	First Scan	Spectrum File	Ions Matched	Ions Score	Identity Strict	Identity Relaxed	Expectation Value	XCorr	Percolator q-Value	Percolator PEP
High	TRUE	Homo sapiens	P22079	Sequest HT (A4)	1.61156	0.00182357	a-c	71.4682	12959	A_IyII_1-3.raw	0/0					4.67349	0	0.009983
High	TRUE	Homo sapiens	P22079	Mascot (A2)	1.61156	0.00182357	a-c	71.4682	12959	A_IyII_1-3.raw	7/152	34.79	46	39	0.156654		0	0.008299
High	TRUE	Homo sapiens	P22079	Sequest HT (A4)	0.85641	0.000969074	a-c	73.008	13268	A_IyII_1-3.raw	0/0					3.68731	0	0.02001
High	TRUE	Homo sapiens	P22079	Sequest HT (A4)	0.823499	0.000621222	a-c	68.3797	12334	A_IyII_1-3.raw	0/0					3.86968	0	0.02541
High	TRUE	Homo sapiens	P22079	Mascot (A2)	0.823499	0.000621222	a-c	68.3797	12334	A_IyII_1-3.raw	21/152	29.05	46	39	0.599296		0	0.01863
High	TRUE	Homo sapiens	P22079	Sequest HT (A4)	1.28792	0.00145735	a-c	68.3602	12330	A_IyII_1-3.raw	0/0					5.72508	0	0.0003912
High	TRUE	Homo sapiens	P22079	Mascot (A2)	1.28792	0.00145735	a-c	68.3602	12330	A_IyII_1-3.raw	14/152	60.76	46	39	0.000401514		0	0.0001198
High	TRUE	Homo sapiens	P22079	Sequest HT (A4)	1.28792	0.00145735	a-c	69.9119	12643	A_IyII_1-3.raw	0/0					4.69916	0	0.002238
High	TRUE	Homo sapiens	P22079	Mascot (A2)	1.28792	0.00145735	a-c	69.9119	12643	A_IyII_1-3.raw	13/152	50.97	46	39	0.00382561		0	0.001353
High	TRUE	Homo sapiens	P22079	Mascot (A2)	0.85641	0.000969074	a-c	73.008	13268	A_IyII_1-3.raw	14/152	22.85	46	39	2.50347		0.002414	0.04171
IHGFDLAAINTQR	High	Homo sapiens	P22079		0.01636		a-c
Confidence	Checked	Homo sapiens	Master Protein Accessions	Identifying Node	DeltaM [ppm]	Deltam/z [Da]	a-c	RT [min]	First Scan	Spectrum File	Ions Matched	Ions Score	Identity Strict	Identity Relaxed	Expectation Value	XCorr	Percolator q-Value	Percolator PEP
High	TRUE	Homo sapiens	P22079	Sequest HT (A4)	0.510483	0.000247715	a-c	31.1737	4772	A_IyII_1-3.raw	0/0					4.43841	0	0.01636
High	TRUE	Homo sapiens	P22079	Mascot (A2)	0.510483	0.000247715	a-c	31.1737	4772	A_IyII_1-3.raw	15/108	42.43	45	38	0.0180902		0	0.01442
AFCDLSQPQTLEELNTVLK	High	Homo sapiens	P22079	1xCarbamidomethyl [C3]	0.00361		a-c
Confidence	Checked	Homo sapiens	Master Protein Accessions	Identifying Node	DeltaM [ppm]	Deltam/z [Da]	a-c	RT [min]	First Scan	Spectrum File	Ions Matched	Ions Score	Identity Strict	Identity Relaxed	Expectation Value	XCorr	Percolator q-Value	Percolator PEP
High	TRUE	Homo sapiens	P22079	Sequest HT (A4)	1.62373	0.00119404	a-c	46.491	7934	A_IyII_1-3.raw	0/0					6.77145	0	0.00361
High	TRUE	Homo sapiens	P22079	Mascot (A2)	1.62373	0.00119404	a-c	46.491	7934	A_IyII_1-3.raw	19/192	49.08	47	40	0.00639232		0	0.006132
High	TRUE	Homo sapiens	P22079	Sequest HT (A4)	1.10417	0.00121795	a-c	46.4617	7928	A_IyII_1-3.raw	0/0					6.47604	0	0.0003586
High	TRUE	Homo sapiens	P22079	Mascot (A2)	1.10417	0.00121795	a-c	46.4617	7928	A_IyII_1-3.raw	14/192	68	47	40	8.25809e-05		0	8.287e-05
High	TRUE	Homo sapiens	P22079	Sequest HT (A4)	-0.00249308	-2.75e-06	a-c	48.0044	8239	A_IyII_1-3.raw	0/0					2.9752	0	0.04431
High	TRUE	Homo sapiens	P22079	Mascot (A2)	-0.00249308	-2.75e-06	a-c	48.0044	8239	A_IyII_1-3.raw	9/192	19.39	47	40	6.0417		0.002414	0.04798
LNPQWDGEKLYQEAR	High	Homo sapiens	P22079		0.005591		a-c
Confidence	Checked	Homo sapiens	Master Protein Accessions	Identifying Node	DeltaM [ppm]	Deltam/z [Da]	a-c	RT [min]	First Scan	Spectrum File	Ions Matched	Ions Score	Identity Strict	Identity Relaxed	Expectation Value	XCorr	Percolator q-Value	Percolator PEP
High	TRUE	Homo sapiens	P22079	Sequest HT (A4)	0.998885	0.000922424	a-c	30.1441	4556	A_IyII_1-3.raw	0/0					4.14585	0	0.01385
High	TRUE	Homo sapiens	P22079	Mascot (A2)	0.998885	0.000922424	a-c	30.1441	4556	A_IyII_1-3.raw	21/164	64.03	46	39	0.000161389		0	0.003078
High	TRUE	Homo sapiens	P22079	Sequest HT (A4)	1.12379	0.000691848	a-c	30.0184	4530	A_IyII_1-3.raw	0/0					4.32152	0	0.005591
High	TRUE	Homo sapiens	P22079	Mascot (A2)	1.12379	0.000691848	a-c	30.0184	4530	A_IyII_1-3.raw	11/164	47.1	46	39	0.00794269		0	0.005939
VPCFLAGDSR	High	Homo sapiens	P22079	1xCarbamidomethyl [C3]	0.03809		a-c
Confidence	Checked	Homo sapiens	Master Protein Accessions	Identifying Node	DeltaM [ppm]	Deltam/z [Da]	a-c	RT [min]	First Scan	Spectrum File	Ions Matched	Ions Score	Identity Strict	Identity Relaxed	Expectation Value	XCorr	Percolator q-Value	Percolator PEP
High	TRUE	Homo sapiens	P22079	Mascot (A2)	0.883352	0.000495358	a-c	28.9158	4305	A_IyII_1-3.raw	9/72	49.62	44	37	0.00342549		0	0.007715
High	TRUE	Homo sapiens	P22079	Sequest HT (A4)	0.883352	0.000495358	a-c	28.9158	4305	A_IyII_1-3.raw	0/0					3.352	0	0.03809
DGGIDPLVRGLLAK	High	Homo sapiens	P22079		0.05386		a-c
Confidence	Checked	Homo sapiens	Master Protein Accessions	Identifying Node	DeltaM [ppm]	Deltam/z [Da]	a-c	RT [min]	First Scan	Spectrum File	Ions Matched	Ions Score	Identity Strict	Identity Relaxed	Expectation Value	XCorr	Percolator q-Value	Percolator PEP
High	TRUE	Homo sapiens	P22079	Sequest HT (A4)	0.50421	0.000239303	a-c	40.2565	6662	A_IyII_1-3.raw	0/0					3.56011	0	0.05386
High	TRUE	Homo sapiens	P22079	Mascot (A2)	0.50421	0.000239303	a-c	40.2565	6662	A_IyII_1-3.raw	14/124	39.19	40	33	0.0137495		0.002414	0.07103
DGGIDPLVR	High	Homo sapiens	P22079		0.1261		a-c
Confidence	Checked	Homo sapiens	Master Protein Accessions	Identifying Node	DeltaM [ppm]	Deltam/z [Da]	a-c	RT [min]	First Scan	Spectrum File	Ions Matched	Ions Score	Identity Strict	Identity Relaxed	Expectation Value	XCorr	Percolator q-Value	Percolator PEP
High	TRUE	Homo sapiens	P22079	Sequest HT (A4)	0.823	0.000387429	a-c	29.9058	4507	A_IyII_1-3.raw	0/0					3.03595	0.001107	0.1261
High	TRUE	Homo sapiens	P22079	Mascot (A2)	0.823	0.000387429	a-c	29.9058	4507	A_IyII_1-3.raw	6/64	37.47	41	34	0.0240389		0.004235	0.1671
AFCDLSQPQTLEELNTVLK	High	Homo sapiens	P22079	1xDeamidated [Q/N]; 1xCarbamidomethyl [C3]	0.1352		a-c
Confidence	Checked	Homo sapiens	Master Protein Accessions	Identifying Node	DeltaM [ppm]	Deltam/z [Da]	a-c	RT [min]	First Scan	Spectrum File	Ions Matched	Ions Score	Identity Strict	Identity Relaxed	Expectation Value	XCorr	Percolator q-Value	Percolator PEP
High	TRUE	Homo sapiens	P22079	Sequest HT (A4)	2.26188	0.00249609	a-c	52.2776	9103	A_IyII_1-3.raw	0/0					3.07988	0.001107	0.1352
High	TRUE	Homo sapiens	P22079	Mascot (A2)	-0.20543	-0.000151134	a-c	51.2959	8904	A_IyII_1-3.raw	5/192	7.97	47	40	80.8712		0.004235	0.1599
High	TRUE	Homo sapiens	P22079	Mascot (A2)	2.26188	0.00249609	a-c	52.2776	9103	A_IyII_1-3.raw	5/192	21.47	47	40	3.58423		0.004235	0.123
AQCDEYCIQGDNCFPIMFPPNDPK	High	Homo sapiens	P22079	3xCarbamidomethyl [C3; C7; C13]; 1xOxidation [M17]	0.1075		a-c
Confidence	Checked	Homo sapiens	Master Protein Accessions	Identifying Node	DeltaM [ppm]	Deltam/z [Da]	a-c	RT [min]	First Scan	Spectrum File	Ions Matched	Ions Score	Identity Strict	Identity Relaxed	Expectation Value	XCorr	Percolator q-Value	Percolator PEP
High	TRUE	Homo sapiens	P22079	Sequest HT (A4)	2.16634	0.00211738	a-c	41.2787	6871	A_IyII_1-3.raw	0/0					3.70706	0.001107	0.1075
Sequence	Confidence	Homo sapiens	Master Protein Accessions	Modifications	Percolator PEP Sequest HT		a-c
TTYEEYLGPQYVTAIAKLR	High	Homo sapiens	Q9TUM0		0.1324		a-c
Confidence	Checked	Homo sapiens	Master Protein Accessions	Identifying Node	DeltaM [ppm]	Deltam/z [Da]	a-c	RT [min]	First Scan	Spectrum File	Ions Matched	Ions Score	Identity Strict	Identity Relaxed	Expectation Value	XCorr	Percolator q-Value	Percolator PEP
High	TRUE	Homo sapiens	Q9TUM0	Sequest HT (A4)	1.62635	0.00120142	a-c	35.5944	5695	A_IyII_1-3.raw	0/0					4.39525	0.001107	0.1324
High	TRUE	Homo sapiens	Q9TUM0	Mascot (A2)	1.62635	0.00120142	a-c	35.5944	5695	A_IyII_1-3.raw	15/180	25.45	46	39	1.32458		0.004235	0.1067
Sequence	Confidence	Homo sapiens	Master Protein Accessions	Modifications	Percolator PEP Sequest HT		a-c
IGFPWSEIR	High	Homo sapiens	O35763; P15311		0.1447		a-c
Confidence	Checked	Homo sapiens	Master Protein Accessions	Identifying Node	DeltaM [ppm]	Deltam/z [Da]	a-c	RT [min]	First Scan	Spectrum File	Ions Matched	Ions Score	Identity Strict	Identity Relaxed	Expectation Value	XCorr	Percolator q-Value	Percolator PEP
High	TRUE	Homo sapiens	O35763; P15311	Mascot (A2)	1.00368	0.000554323	a-c	40.5219	6717	A_IyII_1-3.raw	8/64	59.39	45	38	0.000427695		0	0.01477
High	TRUE	Homo sapiens	O35763; P15311	Sequest HT (A4)	1.00368	0.000554323	a-c	40.5219	6717	A_IyII_1-3.raw	0/0					2.85829	0.001107	0.1447
FYPEDVSEELIQDITQR	High	Homo sapiens	O35763		0.0001833		a-c
Confidence	Checked	Homo sapiens	Master Protein Accessions	Identifying Node	DeltaM [ppm]	Deltam/z [Da]	a-c	RT [min]	First Scan	Spectrum File	Ions Matched	Ions Score	Identity Strict	Identity Relaxed	Expectation Value	XCorr	Percolator q-Value	Percolator PEP
High	TRUE	Homo sapiens	O35763	Sequest HT (A4)	1.35833	0.00141403	a-c	68.4398	12346	A_IyII_1-3.raw	0/0					4.7483	0	0.0001833
High	TRUE	Homo sapiens	O35763	Mascot (A2)	1.35833	0.00141403	a-c	68.4398	12346	A_IyII_1-3.raw	21/148	88.22	46	39	6.42643e-07		0	7.82e-05
High	TRUE	Homo sapiens	O35763	Sequest HT (A4)	0.149935	0.000104055	a-c	68.3203	12322	A_IyII_1-3.raw	0/0					2.59718	0	0.08834
High	TRUE	Homo sapiens	O35763	Mascot (A2)	0.149935	0.000104055	a-c	68.3203	12322	A_IyII_1-3.raw	9/148	12.28	46	39	24.674		0.004235	0.1461
EVWFFGLQYQDTK	High	Homo sapiens	O35763		0.0367		a-c
Confidence	Checked	Homo sapiens	Master Protein Accessions	Identifying Node	DeltaM [ppm]	Deltam/z [Da]	a-c	RT [min]	First Scan	Spectrum File	Ions Matched	Ions Score	Identity Strict	Identity Relaxed	Expectation Value	XCorr	Percolator q-Value	Percolator PEP
High	TRUE	Homo sapiens	O35763	Sequest HT (A4)	0.588367	0.00048858	a-c	50.7805	8800	A_IyII_1-3.raw	0/0					3.36662	0	0.0367
High	TRUE	Homo sapiens	O35763	Mascot (A2)	0.588367	0.00048858	a-c	50.7805	8800	A_IyII_1-3.raw	12/116	18.59	45	38	4.70689		0.004235	0.1445
KAPDFVFYAPR	High	Homo sapiens	O35763; P15311		0.1276		a-c
Confidence	Checked	Homo sapiens	Master Protein Accessions	Identifying Node	DeltaM [ppm]	Deltam/z [Da]	a-c	RT [min]	First Scan	Spectrum File	Ions Matched	Ions Score	Identity Strict	Identity Relaxed	Expectation Value	XCorr	Percolator q-Value	Percolator PEP
High	TRUE	Homo sapiens	O35763; P15311	Sequest HT (A4)	-0.233804	-0.000102148	a-c	31.2932	4797	A_IyII_1-3.raw	0/0					1.75137	0.001107	0.1276
AKFYPEDVSEELIQDITQR	High	Homo sapiens	O35763		0.1654		a-c
Confidence	Checked	Homo sapiens	Master Protein Accessions	Identifying Node	DeltaM [ppm]	Deltam/z [Da]	a-c	RT [min]	First Scan	Spectrum File	Ions Matched	Ions Score	Identity Strict	Identity Relaxed	Expectation Value	XCorr	Percolator q-Value	Percolator PEP
High	TRUE	Homo sapiens	O35763	Sequest HT (A4)	1.36912	0.00104105	a-c	50.1541	8674	A_IyII_1-3.raw	0/0					2.91845	0.002128	0.1654
Carbonic anhydrase 6 OS=Homo sapiens GN=CA6 PE=1 SV=3	P23280	Homo sapiens	35.345	4.22078	19.24	1	a-c
Sequence	Confidence	Homo sapiens	Master Protein Accessions	Modifications	Percolator PEP Sequest HT		a-c
VCSTWGDFHYK	High	Homo sapiens	Q9HC84	1xCarbamidomethyl [C2]	0.07841		a-c
Confidence	Checked	Homo sapiens	Master Protein Accessions	Identifying Node	DeltaM [ppm]	Deltam/z [Da]	a-c	RT [min]	First Scan	Spectrum File	Ions Matched	Ions Score	Identity Strict	Identity Relaxed	Expectation Value	XCorr	Percolator q-Value	Percolator PEP
High	TRUE	Homo sapiens	Q9HC84	Sequest HT (A4)	1.03298	0.000481922	a-c	27.699	4054	A_IyII_1-3.raw	0/0					1.53918	0	0.07841
Sequence	Confidence	Homo sapiens	Master Protein Accessions	Modifications	Percolator PEP Sequest HT		a-c
HVEQEKSELQASLEEAEASLEHEEGK	High	Homo sapiens	P13538		0.0005674		a-c
Confidence	Checked	Homo sapiens	Master Protein Accessions	Identifying Node	DeltaM [ppm]	Deltam/z [Da]	a-c	RT [min]	First Scan	Spectrum File	Ions Matched	Ions Score	Identity Strict	Identity Relaxed	Expectation Value	XCorr	Percolator q-Value	Percolator PEP
High	TRUE	Homo sapiens	P13538	Sequest HT (A4)	0.683061	0.000501431	a-c	36.5086	5885	A_IyII_1-3.raw	0/0					5.64603	0	0.0005674
High	TRUE	Homo sapiens	P13538	Mascot (A2)	0.683061	0.000501431	a-c	36.5086	5885	A_IyII_1-3.raw	21/288	34.53	45	38	0.136086		0	0.001051
DLEEATLQHEATAAALR	High	Homo sapiens	P13538		0.005305		a-c
Confidence	Checked	Homo sapiens	Master Protein Accessions	Identifying Node	DeltaM [ppm]	Deltam/z [Da]	a-c	RT [min]	First Scan	Spectrum File	Ions Matched	Ions Score	Identity Strict	Identity Relaxed	Expectation Value	XCorr	Percolator q-Value	Percolator PEP
High	TRUE	Homo sapiens	P13538	Sequest HT (A4)	1.03363	0.000633588	a-c	32.6539	5082	A_IyII_1-3.raw	0/0					4.42286	0	0.005305
High	TRUE	Homo sapiens	P13538	Mascot (A2)	1.03363	0.000633588	a-c	32.6539	5082	A_IyII_1-3.raw	19/164	53.16	46	39	0.00209527		0	0.0007169
IQHELEEAEERADIAESQVNKLR	High	Homo sapiens	Q076A5; P13538		0.02003		a-c
Confidence	Checked	Homo sapiens	Master Protein Accessions	Identifying Node	DeltaM [ppm]	Deltam/z [Da]	a-c	RT [min]	First Scan	Spectrum File	Ions Matched	Ions Score	Identity Strict	Identity Relaxed	Expectation Value	XCorr	Percolator q-Value	Percolator PEP
High	TRUE	Homo sapiens	Q076A5; P13538	Sequest HT (A4)	1.04065	0.000563483	a-c	32.5739	5065	A_IyII_1-3.raw	0/0					4.96904	0	0.02003
High	TRUE	Homo sapiens	Q076A5; P13538	Mascot (A2)	1.04065	0.000563483	a-c	32.5739	5065	A_IyII_1-3.raw	20/260	25.11	47	40	1.56657		0	0.01481
NLTEEMAVLDETIAK	High	Homo sapiens	P13538		0.002542		a-c
Confidence	Checked	Homo sapiens	Master Protein Accessions	Identifying Node	DeltaM [ppm]	Deltam/z [Da]	a-c	RT [min]	First Scan	Spectrum File	Ions Matched	Ions Score	Identity Strict	Identity Relaxed	Expectation Value	XCorr	Percolator q-Value	Percolator PEP
High	TRUE	Homo sapiens	P13538	Sequest HT (A4)	1.22795	0.00102954	a-c	44.7309	7576	A_IyII_1-3.raw	0/0					5.26189	0	0.002542
High	TRUE	Homo sapiens	P13538	Mascot (A2)	1.22795	0.00102954	a-c	44.7309	7576	A_IyII_1-3.raw	21/168	89.56	46	39	5.25812e-07		0	0.0001432
QREEQAEPDGTEVADKAAYLMGLNSAELLK	High	Homo sapiens	P13538		0.00658		a-c
Confidence	Checked	Homo sapiens	Master Protein Accessions	Identifying Node	DeltaM [ppm]	Deltam/z [Da]	a-c	RT [min]	First Scan	Spectrum File	Ions Matched	Ions Score	Identity Strict	Identity Relaxed	Expectation Value	XCorr	Percolator q-Value	Percolator PEP
High	TRUE	Homo sapiens	P13538	Sequest HT (A4)	4.7267	0.00387188	a-c	41.9768	7014	A_IyII_1-3.raw	0/0					6.2664	0	0.00658
High	TRUE	Homo sapiens	P13538	Mascot (A2)	4.7267	0.00387188	a-c	41.9768	7014	A_IyII_1-3.raw	23/348	56.51	47	40	0.00112338		0	0.002896
High	TRUE	Homo sapiens	P13538	Sequest HT (A4)	0.576857	0.000630044	a-c	41.963	7011	A_IyII_1-3.raw	0/0					6.1389	0	0.004285
High	TRUE	Homo sapiens	P13538	Mascot (A2)	0.576857	0.000630044	a-c	41.963	7011	A_IyII_1-3.raw	17/348	47.01	46	40	0.00995934		0	0.001695
HVEQEKSELQASLEEAEASLEHEEGKILR	High	Homo sapiens	P13538		0.01258		a-c
Confidence	Checked	Homo sapiens	Master Protein Accessions	Identifying Node	DeltaM [ppm]	Deltam/z [Da]	a-c	RT [min]	First Scan	Spectrum File	Ions Matched	Ions Score	Identity Strict	Identity Relaxed	Expectation Value	XCorr	Percolator q-Value	Percolator PEP
High	TRUE	Homo sapiens	P13538	Sequest HT (A4)	1.6632	0.00110391	a-c	40.3518	6682	A_IyII_1-3.raw	0/0					5.53224	0	0.01258
High	TRUE	Homo sapiens	P13538	Mascot (A2)	1.6632	0.00110391	a-c	40.3518	6682	A_IyII_1-3.raw	30/324	41.24	47	40	0.0387725		0	0.002632
KKLETDIVQIQSEMEDTIQEAR	High	Homo sapiens	P13538		0.01015		a-c
Confidence	Checked	Homo sapiens	Master Protein Accessions	Identifying Node	DeltaM [ppm]	Deltam/z [Da]	a-c	RT [min]	First Scan	Spectrum File	Ions Matched	Ions Score	Identity Strict	Identity Relaxed	Expectation Value	XCorr	Percolator q-Value	Percolator PEP
High	TRUE	Homo sapiens	P13538	Sequest HT (A4)	0.55503	0.000361369	a-c	38.4649	6291	A_IyII_1-3.raw	0/0					5.43551	0	0.01015
High	TRUE	Homo sapiens	P13538	Mascot (A2)	0.55503	0.000361369	a-c	38.4649	6291	A_IyII_1-3.raw	19/252	35.19	47	40	0.165391		0	0.001985
NLQQEIADLTEQIAEGGKAVHELEK	High	Homo sapiens	P13538		0.004747		a-c
Confidence	Checked	Homo sapiens	Master Protein Accessions	Identifying Node	DeltaM [ppm]	Deltam/z [Da]	a-c	RT [min]	First Scan	Spectrum File	Ions Matched	Ions Score	Identity Strict	Identity Relaxed	Expectation Value	XCorr	Percolator q-Value	Percolator PEP
High	TRUE	Homo sapiens	P13538	Sequest HT (A4)	0.154759	0.000142554	a-c	62.7644	11201	A_IyII_1-3.raw	0/0					2.54998	0	0.09591
High	TRUE	Homo sapiens	P13538	Sequest HT (A4)	1.3205	0.00091227	a-c	62.68	11184	A_IyII_1-3.raw	0/0					4.55903	0	0.004747
High	TRUE	Homo sapiens	P13538	Mascot (A2)	1.3205	0.00091227	a-c	62.68	11184	A_IyII_1-3.raw	27/288	30.49	46	39	0.422355		0	0.006834
IKEVTERAEDEEEINAELTAK	High	Homo sapiens	Q076A5; P11055; P13538		0.0611		a-c
Confidence	Checked	Homo sapiens	Master Protein Accessions	Identifying Node	DeltaM [ppm]	Deltam/z [Da]	a-c	RT [min]	First Scan	Spectrum File	Ions Matched	Ions Score	Identity Strict	Identity Relaxed	Expectation Value	XCorr	Percolator q-Value	Percolator PEP
High	TRUE	Homo sapiens	Q076A5; P11055; P13538	Sequest HT (A4)	0.527543	0.000425059	a-c	26.5049	3810	A_IyII_1-3.raw	0/0					2.90693	0	0.03697
High	TRUE	Homo sapiens	Q076A5; P11055; P13538	Sequest HT (A4)	0.824984	0.000498538	a-c	26.5781	3825	A_IyII_1-3.raw	0/0					3.35872	0	0.0611
High	TRUE	Homo sapiens	Q076A5; P11055; P13538	Mascot (A2)	0.824984	0.000498538	a-c	26.5781	3825	A_IyII_1-3.raw	18/236	18.79	47	40	6.77825		0	0.02347
High	TRUE	Homo sapiens	Q076A5; P11055; P13538	Mascot (A2)	0.527543	0.000425059	a-c	26.5049	3810	A_IyII_1-3.raw	12/236	16.25	47	40	12.1711		0.002414	0.08032
QAEEKDALISQLSR	High	Homo sapiens	P13538		0.01291		a-c
Confidence	Checked	Homo sapiens	Master Protein Accessions	Identifying Node	DeltaM [ppm]	Deltam/z [Da]	a-c	RT [min]	First Scan	Spectrum File	Ions Matched	Ions Score	Identity Strict	Identity Relaxed	Expectation Value	XCorr	Percolator q-Value	Percolator PEP
High	TRUE	Homo sapiens	P13538	Sequest HT (A4)	0.792901	0.000419665	a-c	27.186	3950	A_IyII_1-3.raw	0/0					2.60121	0	0.01291
High	TRUE	Homo sapiens	P13538	Mascot (A2)	0.792901	0.000419665	a-c	27.186	3950	A_IyII_1-3.raw	6/156	27.3	46	39	0.875553		0.003589	0.09553
MQGTLEDQIISANPLLEAFGNAK	High	Homo sapiens	Q076A5; P13538		0.03121		a-c
Confidence	Checked	Homo sapiens	Master Protein Accessions	Identifying Node	DeltaM [ppm]	Deltam/z [Da]	a-c	RT [min]	First Scan	Spectrum File	Ions Matched	Ions Score	Identity Strict	Identity Relaxed	Expectation Value	XCorr	Percolator q-Value	Percolator PEP
High	TRUE	Homo sapiens	Q076A5; P13538	Sequest HT (A4)	1.02954	0.000844306	a-c	70.8929	12843	A_IyII_1-3.raw	0/0					3.9753	0	0.03121
High	TRUE	Homo sapiens	Q076A5; P13538	Sequest HT (A4)	0.910962	0.00112059	a-c	70.863	12837	A_IyII_1-3.raw	0/0					3.97505	0	0.01157
High	TRUE	Homo sapiens	Q076A5; P13538	Mascot (A2)	0.910962	0.00112059	a-c	70.863	12837	A_IyII_1-3.raw	9/260	53.34	47	40	0.00252301		0	0.006632
High	TRUE	Homo sapiens	Q076A5; P13538	Mascot (A2)	1.02954	0.000844306	a-c	70.8929	12843	A_IyII_1-3.raw	10/260	9.46	47	40	61.6932		0.002414	0.08672
MQGTLEDQIISANPLLEAFGNAK	High	Homo sapiens	Q076A5; P13538	1xOxidation [M1]	0.002898		a-c
Confidence	Checked	Homo sapiens	Master Protein Accessions	Identifying Node	DeltaM [ppm]	Deltam/z [Da]	a-c	RT [min]	First Scan	Spectrum File	Ions Matched	Ions Score	Identity Strict	Identity Relaxed	Expectation Value	XCorr	Percolator q-Value	Percolator PEP
High	TRUE	Homo sapiens	Q076A5; P13538	Sequest HT (A4)	2.26844	0.0028086	a-c	69.3375	12528	A_IyII_1-3.raw	0/0					5.51702	0	0.002898
High	TRUE	Homo sapiens	Q076A5; P13538	Mascot (A2)	2.26844	0.0028086	a-c	69.3375	12528	A_IyII_1-3.raw	10/260	75.21	47	40	1.66484e-05		0	0.001576
NLQQEIADLTEQIAEGGK	High	Homo sapiens	P13538		0.000245		a-c
Confidence	Checked	Homo sapiens	Master Protein Accessions	Identifying Node	DeltaM [ppm]	Deltam/z [Da]	a-c	RT [min]	First Scan	Spectrum File	Ions Matched	Ions Score	Identity Strict	Identity Relaxed	Expectation Value	XCorr	Percolator q-Value	Percolator PEP
High	TRUE	Homo sapiens	P13538	Sequest HT (A4)	0.375719	0.000245092	a-c	68.7483	12409	A_IyII_1-3.raw	0/0					4.74436	0	0.005398
High	TRUE	Homo sapiens	P13538	Mascot (A2)	0.725661	0.000710055	a-c	68.8217	12424	A_IyII_1-3.raw	12/204	70.7	46	39	3.87523e-05		0	3.775e-05
High	TRUE	Homo sapiens	P13538	Sequest HT (A4)	0.725661	0.000710055	a-c	68.8217	12424	A_IyII_1-3.raw	0/0					6.57056	0	0.000245
High	TRUE	Homo sapiens	P13538	Mascot (A2)	0.375719	0.000245092	a-c	68.7483	12409	A_IyII_1-3.raw	14/204	18.59	46	39	6.28277		0.001533	0.03281
QAEEAEELSNVNLSK	High	Homo sapiens	P13538		0.001174		a-c
Confidence	Checked	Homo sapiens	Master Protein Accessions	Identifying Node	DeltaM [ppm]	Deltam/z [Da]	a-c	RT [min]	First Scan	Spectrum File	Ions Matched	Ions Score	Identity Strict	Identity Relaxed	Expectation Value	XCorr	Percolator q-Value	Percolator PEP
High	TRUE	Homo sapiens	P13538	Sequest HT (A4)	1.38528	0.00115033	a-c	27.9002	4095	A_IyII_1-3.raw	0/0					4.61008	0	0.001174
High	TRUE	Homo sapiens	P13538	Mascot (A2)	1.38528	0.00115033	a-c	27.9002	4095	A_IyII_1-3.raw	12/168	80.89	45	38	3.02174e-06		0	0.000322
NKDPLNETVIGLYQK	High	Homo sapiens	P13538		0.005801		a-c
Confidence	Checked	Homo sapiens	Master Protein Accessions	Identifying Node	DeltaM [ppm]	Deltam/z [Da]	a-c	RT [min]	First Scan	Spectrum File	Ions Matched	Ions Score	Identity Strict	Identity Relaxed	Expectation Value	XCorr	Percolator q-Value	Percolator PEP
High	TRUE	Homo sapiens	P13538	Sequest HT (A4)	1.16873	0.000674721	a-c	32.1087	4968	A_IyII_1-3.raw	0/0					3.69091	0	0.005801
High	TRUE	Homo sapiens	P13538	Mascot (A2)	1.16873	0.000674721	a-c	32.1087	4968	A_IyII_1-3.raw	7/168	36.93	46	39	0.0864401		0	0.006423
ALQEAHQQTLDDLQVEEDKVNTLTK	High	Homo sapiens	P13538		5.857e-05		a-c
Confidence	Checked	Homo sapiens	Master Protein Accessions	Identifying Node	DeltaM [ppm]	Deltam/z [Da]	a-c	RT [min]	First Scan	Spectrum File	Ions Matched	Ions Score	Identity Strict	Identity Relaxed	Expectation Value	XCorr	Percolator q-Value	Percolator PEP
High	TRUE	Homo sapiens	P13538	Sequest HT (A4)	2.03505	0.00194445	a-c	31.9276	4930	A_IyII_1-3.raw	0/0					8.93926	0	5.857e-05
High	TRUE	Homo sapiens	P13538	Mascot (A2)	2.03505	0.00194445	a-c	31.9276	4930	A_IyII_1-3.raw	21/280	73.5	47	40	2.37167e-05		0	4.413e-05
AITDAAMMAEELKKEQDTSAHLER	High	Homo sapiens	Q076A5; P11055; P13538		0.001595		a-c
Confidence	Checked	Homo sapiens	Master Protein Accessions	Identifying Node	DeltaM [ppm]	Deltam/z [Da]	a-c	RT [min]	First Scan	Spectrum File	Ions Matched	Ions Score	Identity Strict	Identity Relaxed	Expectation Value	XCorr	Percolator q-Value	Percolator PEP
High	TRUE	Homo sapiens	Q076A5; P11055; P13538	Mascot (A2)	0.829775	0.00055767	a-c	31.4902	4839	A_IyII_1-3.raw	25/228	38.25	46	39	0.0716472		0	0.0007368
High	TRUE	Homo sapiens	Q076A5; P11055; P13538	Sequest HT (A4)	0.756661	0.000406826	a-c	31.4761	4836	A_IyII_1-3.raw	0/0					5.54078	0	0.001573
High	TRUE	Homo sapiens	Q076A5; P11055; P13538	Mascot (A2)	0.756661	0.000406826	a-c	31.4761	4836	A_IyII_1-3.raw	24/228	33.09	46	39	0.233549		0	0.009468
High	TRUE	Homo sapiens	Q076A5; P11055; P13538	Sequest HT (A4)	0.829775	0.00055767	a-c	31.4902	4839	A_IyII_1-3.raw	0/0					5.92885	0	0.001595
LQLELNQIKSEIDRK	High	Homo sapiens	P13538		0.00493		a-c
Confidence	Checked	Homo sapiens	Master Protein Accessions	Identifying Node	DeltaM [ppm]	Deltam/z [Da]	a-c	RT [min]	First Scan	Spectrum File	Ions Matched	Ions Score	Identity Strict	Identity Relaxed	Expectation Value	XCorr	Percolator q-Value	Percolator PEP
High	TRUE	Homo sapiens	P13538	Mascot (A2)	1.01893	0.000465404	a-c	31.7129	4885	A_IyII_1-3.raw	15/164	25.2	42	35	0.55552		0	0.0137
High	TRUE	Homo sapiens	P13538	Sequest HT (A4)	1.01893	0.000465404	a-c	31.7129	4885	A_IyII_1-3.raw	0/0					4.04346	0	0.00493
ANLLQAEVEELRGALEQTER	High	Homo sapiens	P13538		0.00646		a-c
Confidence	Checked	Homo sapiens	Master Protein Accessions	Identifying Node	DeltaM [ppm]	Deltam/z [Da]	a-c	RT [min]	First Scan	Spectrum File	Ions Matched	Ions Score	Identity Strict	Identity Relaxed	Expectation Value	XCorr	Percolator q-Value	Percolator PEP
High	TRUE	Homo sapiens	P13538	Sequest HT (A4)	1.12676	0.000852272	a-c	59.0759	10457	A_IyII_1-3.raw	0/0					2.85102	0	0.00646
High	TRUE	Homo sapiens	P13538	Mascot (A2)	1.12676	0.000852272	a-c	59.0759	10457	A_IyII_1-3.raw	10/224	22.21	46	39	2.64757		0	0.01992
HADSTAELGEQIDNLQR	High	Homo sapiens	P13538		0.004442		a-c
Confidence	Checked	Homo sapiens	Master Protein Accessions	Identifying Node	DeltaM [ppm]	Deltam/z [Da]	a-c	RT [min]	First Scan	Spectrum File	Ions Matched	Ions Score	Identity Strict	Identity Relaxed	Expectation Value	XCorr	Percolator q-Value	Percolator PEP
High	TRUE	Homo sapiens	P13538	Sequest HT (A4)	1.39845	0.000884242	a-c	28.8291	4287	A_IyII_1-3.raw	0/0					3.83663	0	0.004442
High	TRUE	Homo sapiens	P13538	Mascot (A2)	1.39845	0.000884242	a-c	28.8291	4287	A_IyII_1-3.raw	14/152	39.15	45	38	0.0457468		0	0.002868
KALQEAHQQTLDDLQVEEDKVNTLTK	High	Homo sapiens	P13538		0.0006234		a-c
Confidence	Checked	Homo sapiens	Master Protein Accessions	Identifying Node	DeltaM [ppm]	Deltam/z [Da]	a-c	RT [min]	First Scan	Spectrum File	Ions Matched	Ions Score	Identity Strict	Identity Relaxed	Expectation Value	XCorr	Percolator q-Value	Percolator PEP
High	TRUE	Homo sapiens	P13538	Mascot (A2)	1.68112	0.00125855	a-c	29.5617	4437	A_IyII_1-3.raw	28/300	57.86	46	39	0.000730675		0	0.0002416
High	TRUE	Homo sapiens	P13538	Sequest HT (A4)	1.68112	0.00125855	a-c	29.5617	4437	A_IyII_1-3.raw	0/0					6.76209	0	0.0006234
NAYEESLDHLETLKR	High	Homo sapiens	Q076A5; P13538		0.02349		a-c
Confidence	Checked	Homo sapiens	Master Protein Accessions	Identifying Node	DeltaM [ppm]	Deltam/z [Da]	a-c	RT [min]	First Scan	Spectrum File	Ions Matched	Ions Score	Identity Strict	Identity Relaxed	Expectation Value	XCorr	Percolator q-Value	Percolator PEP
High	TRUE	Homo sapiens	Q076A5; P13538	Sequest HT (A4)	0.967053	0.000586003	a-c	29.3379	4391	A_IyII_1-3.raw	0/0					3.66455	0	0.02349
High	TRUE	Homo sapiens	Q076A5; P13538	Mascot (A2)	0.967053	0.000586003	a-c	29.3379	4391	A_IyII_1-3.raw	15/168	14.24	46	39	17.1607		0	0.01765
IEELEEEIEAERTSR	High	Homo sapiens	P13538		0.03579		a-c
Confidence	Checked	Homo sapiens	Master Protein Accessions	Identifying Node	DeltaM [ppm]	Deltam/z [Da]	a-c	RT [min]	First Scan	Spectrum File	Ions Matched	Ions Score	Identity Strict	Identity Relaxed	Expectation Value	XCorr	Percolator q-Value	Percolator PEP
High	TRUE	Homo sapiens	P13538	Sequest HT (A4)	0.873762	0.000533836	a-c	29.3034	4384	A_IyII_1-3.raw	0/0					2.62187	0	0.03579
QGFTQQIEELKR	High	Homo sapiens	P13538		0.1362		a-c
Confidence	Checked	Homo sapiens	Master Protein Accessions	Identifying Node	DeltaM [ppm]	Deltam/z [Da]	a-c	RT [min]	First Scan	Spectrum File	Ions Matched	Ions Score	Identity Strict	Identity Relaxed	Expectation Value	XCorr	Percolator q-Value	Percolator PEP
High	TRUE	Homo sapiens	P13538	Sequest HT (A4)	1.20116	0.000591281	a-c	27.3457	3982	A_IyII_1-3.raw	0/0					2.19892	0.001107	0.1362
High	TRUE	Homo sapiens	P13538	Mascot (A2)	1.20116	0.000591281	a-c	27.3457	3982	A_IyII_1-3.raw	8/132	34.77	46	39	0.153393		0.002414	0.09229
NTQGTLKDTQIHLDDALR	High	Homo sapiens	P13538		0.07212		a-c
Confidence	Checked	Homo sapiens	Master Protein Accessions	Identifying Node	DeltaM [ppm]	Deltam/z [Da]	a-c	RT [min]	First Scan	Spectrum File	Ions Matched	Ions Score	Identity Strict	Identity Relaxed	Expectation Value	XCorr	Percolator q-Value	Percolator PEP
High	TRUE	Homo sapiens	P13538	Sequest HT (A4)	-0.238322	-0.000161984	a-c	28.1473	4145	A_IyII_1-3.raw	0/0					2.20319	0	0.07212
SELQASLEEAEASLEHEEGKILR	High	Homo sapiens	P13538		0.05645		a-c
Confidence	Checked	Homo sapiens	Master Protein Accessions	Identifying Node	DeltaM [ppm]	Deltam/z [Da]	a-c	RT [min]	First Scan	Spectrum File	Ions Matched	Ions Score	Identity Strict	Identity Relaxed	Expectation Value	XCorr	Percolator q-Value	Percolator PEP
High	TRUE	Homo sapiens	P13538	Sequest HT (A4)	-0.117624	-7.55228e-05	a-c	43.652	7358	A_IyII_1-3.raw	0/0					3.15493	0	0.05645
High	TRUE	Homo sapiens	P13538	Mascot (A2)	-0.117624	-7.55228e-05	a-c	43.652	7358	A_IyII_1-3.raw	11/252	34.38	47	40	0.188213		0.002414	0.0446
TKLEQQVDDLEGSLEQEKK	High	Homo sapiens	Q076A5; P13538		0.05981		a-c
Confidence	Checked	Homo sapiens	Master Protein Accessions	Identifying Node	DeltaM [ppm]	Deltam/z [Da]	a-c	RT [min]	First Scan	Spectrum File	Ions Matched	Ions Score	Identity Strict	Identity Relaxed	Expectation Value	XCorr	Percolator q-Value	Percolator PEP
High	TRUE	Homo sapiens	Q076A5; P13538	Sequest HT (A4)	0.731934	0.000405697	a-c	31.1647	4770	A_IyII_1-3.raw	0/0					3.21375	0	0.05981
High	TRUE	Homo sapiens	Q076A5; P13538	Mascot (A2)	0.731934	0.000405697	a-c	31.1647	4770	A_IyII_1-3.raw	13/212	14.7	47	40	18.0435		0.004235	0.1269
Sequence	Confidence	Homo sapiens	Master Protein Accessions	Modifications	Percolator PEP Sequest HT		a-c
FTVEQEIDLKDVLK	High	Homo sapiens	Q90935		0.00126		a-c
Confidence	Checked	Homo sapiens	Master Protein Accessions	Identifying Node	DeltaM [ppm]	Deltam/z [Da]	a-c	RT [min]	First Scan	Spectrum File	Ions Matched	Ions Score	Identity Strict	Identity Relaxed	Expectation Value	XCorr	Percolator q-Value	Percolator PEP
High	TRUE	Homo sapiens	Q90935	Sequest HT (A4)	0.708381	0.000395964	a-c	38.8603	6372	A_IyII_1-3.raw	0/0					5.89921	0	0.00126
High	TRUE	Homo sapiens	Q90935	Mascot (A2)	0.708381	0.000395964	a-c	38.8603	6372	A_IyII_1-3.raw	12/140	47.98	45	38	0.00574867		0	0.004686
Cornulin OS=Homo sapiens GN=CRNN PE=1 SV=1	Q9UBG3	Homo sapiens	53.502	4.84848	64.27	1	a-c
Sequence	Confidence	Homo sapiens	Master Protein Accessions	Modifications	Percolator PEP Sequest HT		a-c
AQLIEEWANSVKK	High	Homo sapiens	O35684		0.01093		a-c
Confidence	Checked	Homo sapiens	Master Protein Accessions	Identifying Node	DeltaM [ppm]	Deltam/z [Da]	a-c	RT [min]	First Scan	Spectrum File	Ions Matched	Ions Score	Identity Strict	Identity Relaxed	Expectation Value	XCorr	Percolator q-Value	Percolator PEP
High	TRUE	Homo sapiens	O35684	Sequest HT (A4)	1.06303	0.000537121	a-c	31.8981	4924	A_IyII_1-3.raw	0/0					4.19638	0	0.01093
High	TRUE	Homo sapiens	O35684	Mascot (A2)	1.06303	0.000537121	a-c	31.8981	4924	A_IyII_1-3.raw	9/140	47.65	45	38	0.00653063		0	0.007715
Sequence	Confidence	Homo sapiens	Master Protein Accessions	Modifications	Percolator PEP Sequest HT		a-c
HHGPQTLYLPVTLSSIPVFQR	High	Homo sapiens	Q14697		0.3504		a-c
Confidence	Checked	Homo sapiens	Master Protein Accessions	Identifying Node	DeltaM [ppm]	Deltam/z [Da]	a-c	RT [min]	First Scan	Spectrum File	Ions Matched	Ions Score	Identity Strict	Identity Relaxed	Expectation Value	XCorr	Percolator q-Value	Percolator PEP
High	TRUE	Homo sapiens	Q14697	Mascot (A2)	1.35672	0.000810742	a-c	41.5125	6919	A_IyII_1-3.raw	23/224	23.8	43	36	1.02404		0.002414	0.06915
Sequence	Confidence	Homo sapiens	Master Protein Accessions	Modifications	Percolator PEP Sequest HT		a-c
DISNYGFPSSVQAIDAAVFYR	High	Homo sapiens	P22894		0.05171		a-c
Confidence	Checked	Homo sapiens	Master Protein Accessions	Identifying Node	DeltaM [ppm]	Deltam/z [Da]	a-c	RT [min]	First Scan	Spectrum File	Ions Matched	Ions Score	Identity Strict	Identity Relaxed	Expectation Value	XCorr	Percolator q-Value	Percolator PEP
High	TRUE	Homo sapiens	P22894	Sequest HT (A4)	1.17809	0.000911108	a-c	69.3626	12533	A_IyII_1-3.raw	0/0					3.6432	0	0.05171
High	TRUE	Homo sapiens	P22894	Sequest HT (A4)	1.31542	0.00152597	a-c	69.4222	12545	A_IyII_1-3.raw	0/0					2.43568	0.001107	0.1293
High	TRUE	Homo sapiens	P22894	Mascot (A2)	1.31542	0.00152597	a-c	69.4222	12545	A_IyII_1-3.raw	7/228	28.43	46	39	0.685446		0.004235	0.1189
Sequence	Confidence	Homo sapiens	Master Protein Accessions	Modifications	Percolator PEP Sequest HT		a-c
NTLSLVNDFIIR	High	Homo sapiens	P55259		0.006561		a-c
Confidence	Checked	Homo sapiens	Master Protein Accessions	Identifying Node	DeltaM [ppm]	Deltam/z [Da]	a-c	RT [min]	First Scan	Spectrum File	Ions Matched	Ions Score	Identity Strict	Identity Relaxed	Expectation Value	XCorr	Percolator q-Value	Percolator PEP
High	TRUE	Homo sapiens	P55259	Sequest HT (A4)	0.64622	0.0004539	a-c	45.746	7782	A_IyII_1-3.raw	0/0					4.25904	0	0.006561
High	TRUE	Homo sapiens	P55259	Mascot (A2)	0.64622	0.0004539	a-c	45.746	7782	A_IyII_1-3.raw	9/132	58.87	44	37	0.000394278		0	0.01045
Sequence	Confidence	Homo sapiens	Master Protein Accessions	Modifications	Percolator PEP Sequest HT		a-c
EGGLGPLNIPLLADVTR	High	Homo sapiens	Q9BGI3		0.02741		a-c
Confidence	Checked	Homo sapiens	Master Protein Accessions	Identifying Node	DeltaM [ppm]	Deltam/z [Da]	a-c	RT [min]	First Scan	Spectrum File	Ions Matched	Ions Score	Identity Strict	Identity Relaxed	Expectation Value	XCorr	Percolator q-Value	Percolator PEP
High	TRUE	Homo sapiens	Q9BGI3	Mascot (A2)	1.21981	0.00105817	a-c	66.7579	12005	A_IyII_1-3.raw	8/164	48.48	42	35	0.00238544		0	0.00605
High	TRUE	Homo sapiens	Q9BGI3	Sequest HT (A4)	1.21981	0.00105817	a-c	66.7579	12005	A_IyII_1-3.raw	0/0					2.5177	0	0.02741
Sequence	Confidence	Homo sapiens	Master Protein Accessions	Modifications	Percolator PEP Sequest HT		a-c
ELNELVSAIEEHFFQPQK	High	Homo sapiens	Q5RFI8		0.01521		a-c
Confidence	Checked	Homo sapiens	Master Protein Accessions	Identifying Node	DeltaM [ppm]	Deltam/z [Da]	a-c	RT [min]	First Scan	Spectrum File	Ions Matched	Ions Score	Identity Strict	Identity Relaxed	Expectation Value	XCorr	Percolator q-Value	Percolator PEP
High	TRUE	Homo sapiens	Q5RFI8	Sequest HT (A4)	0.200943	0.000144551	a-c	68.93	12446	A_IyII_1-3.raw	0/0					2.10479	0	0.01521
High	TRUE	Homo sapiens	Q5RFI8	Mascot (A2)	0.200943	0.000144551	a-c	68.93	12446	A_IyII_1-3.raw	8/196	15.96	46	39	12.3448		0	0.02535
Sequence	Confidence	Homo sapiens	Master Protein Accessions	Modifications	Percolator PEP Sequest HT		a-c
LEGPIAWDVLFNFEQR	High	Homo sapiens	P93400		0.3313		a-c
Confidence	Checked	Homo sapiens	Master Protein Accessions	Identifying Node	DeltaM [ppm]	Deltam/z [Da]	a-c	RT [min]	First Scan	Spectrum File	Ions Matched	Ions Score	Identity Strict	Identity Relaxed	Expectation Value	XCorr	Percolator q-Value	Percolator PEP
High	TRUE	Homo sapiens	P93400	Mascot (A2)	2.44344	0.00236278	a-c	73.546	13375	A_IyII_1-3.raw	7/136	16.08	46	39	11.9887		0.004235	0.1401
Sequence	Confidence	Homo sapiens	Master Protein Accessions	Modifications	Percolator PEP Sequest HT		a-c
AEIVELITQLEAK	High	Homo sapiens	Q9ZWQ8		0.02334		a-c
Confidence	Checked	Homo sapiens	Master Protein Accessions	Identifying Node	DeltaM [ppm]	Deltam/z [Da]	a-c	RT [min]	First Scan	Spectrum File	Ions Matched	Ions Score	Identity Strict	Identity Relaxed	Expectation Value	XCorr	Percolator q-Value	Percolator PEP
High	TRUE	Homo sapiens	Q9ZWQ8	Mascot (A2)	0.834462	0.000607833	a-c	50.6818	8780	A_IyII_1-3.raw	11/112	53.95	44	37	0.00103398		0	0.01374
High	TRUE	Homo sapiens	Q9ZWQ8	Sequest HT (A4)	0.834462	0.000607833	a-c	50.6818	8780	A_IyII_1-3.raw	0/0					3.49881	0	0.02334
Sequence	Confidence	Homo sapiens	Master Protein Accessions	Modifications	Percolator PEP Sequest HT		a-c
ILVTLLGVLR	High	Homo sapiens	Q9FIK7		0.02548		a-c
Confidence	Checked	Homo sapiens	Master Protein Accessions	Identifying Node	DeltaM [ppm]	Deltam/z [Da]	a-c	RT [min]	First Scan	Spectrum File	Ions Matched	Ions Score	Identity Strict	Identity Relaxed	Expectation Value	XCorr	Percolator q-Value	Percolator PEP
High	TRUE	Homo sapiens	Q9FIK7	Sequest HT (A4)	0.15243	8.35884e-05	a-c	49.3974	8520	A_IyII_1-3.raw	0/0					3.24368	0	0.02548
High	TRUE	Homo sapiens	Q9FIK7	Mascot (A2)	0.15243	8.35884e-05	a-c	49.3974	8520	A_IyII_1-3.raw	13/72	42.47	23	16	0.000135897		0	0.01495
Sequence	Confidence	Homo sapiens	Master Protein Accessions	Modifications	Percolator PEP Sequest HT		a-c
NVIPALELVEPIK	High	Homo sapiens	P07602		0.007823		a-c
Confidence	Checked	Homo sapiens	Master Protein Accessions	Identifying Node	DeltaM [ppm]	Deltam/z [Da]	a-c	RT [min]	First Scan	Spectrum File	Ions Matched	Ions Score	Identity Strict	Identity Relaxed	Expectation Value	XCorr	Percolator q-Value	Percolator PEP
High	TRUE	Homo sapiens	P07602	Mascot (A2)	0.576353	0.000413492	a-c	44.3398	7497	A_IyII_1-3.raw	9/144	36.13	36	29	0.00972687		0	0.009706
High	TRUE	Homo sapiens	P07602	Sequest HT (A4)	0.576353	0.000413492	a-c	44.3398	7497	A_IyII_1-3.raw	0/0					3.22165	0	0.007823
SDVYCEVCEFLVK	High	Homo sapiens	P07602	2xCarbamidomethyl [C5; C8]	0.004563		a-c
Confidence	Checked	Homo sapiens	Master Protein Accessions	Identifying Node	DeltaM [ppm]	Deltam/z [Da]	a-c	RT [min]	First Scan	Spectrum File	Ions Matched	Ions Score	Identity Strict	Identity Relaxed	Expectation Value	XCorr	Percolator q-Value	Percolator PEP
High	TRUE	Homo sapiens	P07602	Sequest HT (A4)	0.518009	0.000426772	a-c	43.851	7398	A_IyII_1-3.raw	0/0					4.88343	0	0.004563
High	TRUE	Homo sapiens	P07602	Mascot (A2)	0.518009	0.000426772	a-c	43.851	7398	A_IyII_1-3.raw	10/96	52.34	41	34	0.000795819		0	0.001562
LPALTVHVTQPK	High	Homo sapiens	P07602		0.00422		a-c
Confidence	Checked	Homo sapiens	Master Protein Accessions	Identifying Node	DeltaM [ppm]	Deltam/z [Da]	a-c	RT [min]	First Scan	Spectrum File	Ions Matched	Ions Score	Identity Strict	Identity Relaxed	Expectation Value	XCorr	Percolator q-Value	Percolator PEP
High	TRUE	Homo sapiens	P07602	Mascot (A2)	1.58682	0.00103443	a-c	26.6704	3844	A_IyII_1-3.raw	7/96	47.91	40	33	0.00162293		0	0.01221
High	TRUE	Homo sapiens	P07602	Sequest HT (A4)	0.850886	0.000369787	a-c	26.6403	3838	A_IyII_1-3.raw	0/0					3.39013	0	0.00422
High	TRUE	Homo sapiens	P07602	Mascot (A2)	0.850886	0.000369787	a-c	26.6403	3838	A_IyII_1-3.raw	6/96	36.83	40	33	0.0253866		0	0.003746
High	TRUE	Homo sapiens	P07602	Sequest HT (A4)	1.58682	0.00103443	a-c	26.6704	3844	A_IyII_1-3.raw	0/0					3.02107	0.001107	0.1129
DNATEEEILVYLEK	High	Homo sapiens	P07602		0.01155		a-c
Confidence	Checked	Homo sapiens	Master Protein Accessions	Identifying Node	DeltaM [ppm]	Deltam/z [Da]	a-c	RT [min]	First Scan	Spectrum File	Ions Matched	Ions Score	Identity Strict	Identity Relaxed	Expectation Value	XCorr	Percolator q-Value	Percolator PEP
High	TRUE	Homo sapiens	P07602	Sequest HT (A4)	1.71665	0.00142982	a-c	50.2332	8690	A_IyII_1-3.raw	0/0					3.75028	0	0.01155
High	TRUE	Homo sapiens	P07602	Mascot (A2)	1.71665	0.00142982	a-c	50.2332	8690	A_IyII_1-3.raw	9/152	53.9	46	39	0.00178534		0	0.001309
EIVDSYLPVILDIIK	High	Homo sapiens	P07602		0.3534		a-c
Confidence	Checked	Homo sapiens	Master Protein Accessions	Identifying Node	DeltaM [ppm]	Deltam/z [Da]	a-c	RT [min]	First Scan	Spectrum File	Ions Matched	Ions Score	Identity Strict	Identity Relaxed	Expectation Value	XCorr	Percolator q-Value	Percolator PEP
High	TRUE	Homo sapiens	P07602	Mascot (A2)	1.13777	0.000656116	a-c	82.2488	15022	A_IyII_1-3.raw	8/112	7.03	40	33	23.2136		0.002414	0.05407
Sequence	Confidence	Homo sapiens	Master Protein Accessions	Modifications	Percolator PEP Sequest HT		a-c
AITVFSPDGHLFQVEYALEAVR	High	Homo sapiens	O24616		0.05603		a-c
Confidence	Checked	Homo sapiens	Master Protein Accessions	Identifying Node	DeltaM [ppm]	Deltam/z [Da]	a-c	RT [min]	First Scan	Spectrum File	Ions Matched	Ions Score	Identity Strict	Identity Relaxed	Expectation Value	XCorr	Percolator q-Value	Percolator PEP
High	TRUE	Homo sapiens	O24616	Sequest HT (A4)	2.36377	0.00194008	a-c	61.5266	10951	A_IyII_1-3.raw	0/0					2.47846	0	0.05603
Junction plakoglobin OS=Homo sapiens GN=JUP PE=1 SV=3	P14923	Homo sapiens	81.693	2.41611	42.54	1	a-c
Sequence	Confidence		Master Protein Accessions	Modifications	Percolator PEP Sequest HT		a-c
TFSHELSDFGLESTAGEIPVVAIR	High		P30101		0.007285		a-c
Confidence	Checked		Master Protein Accessions	Identifying Node	DeltaM [ppm]	Deltam/z [Da]	a-c	RT [min]	First Scan	Spectrum File	Ions Matched	Ions Score	Identity Strict	Identity Relaxed	Expectation Value	XCorr	Percolator q-Value	Percolator PEP
High	TRUE		P30101	Sequest HT (A4)	2.42105	0.00207831	a-c	44.9779	7626	A_IyII_1-3.raw	0/0					4.29576	0	0.007285
High	TRUE		P30101	Mascot (A2)	2.42105	0.00207831	a-c	44.9779	7626	A_IyII_1-3.raw	10/184	25.53	47	40	1.44469		0	0.008822
MDATANDVPSPYEVR	High		P30101		0.07578		a-c
Confidence	Checked		Master Protein Accessions	Identifying Node	DeltaM [ppm]	Deltam/z [Da]	a-c	RT [min]	First Scan	Spectrum File	Ions Matched	Ions Score	Identity Strict	Identity Relaxed	Expectation Value	XCorr	Percolator q-Value	Percolator PEP
High	TRUE		P30101	Sequest HT (A4)	2.35199	0.00195775	a-c	29.7788	4481	A_IyII_1-3.raw	0/0					1.75727	0	0.07578
High	TRUE		P30101	Mascot (A2)	2.35199	0.00195775	a-c	29.7788	4481	A_IyII_1-3.raw	5/148	21.66	42	35	1.34352		0.002414	0.08135
Sequence	Confidence		Master Protein Accessions	Modifications	Percolator PEP Sequest HT		a-c
QLAPIWDKLGETYKDHENIVIAK	High		P07237		0.02249		a-c
Confidence	Checked		Master Protein Accessions	Identifying Node	DeltaM [ppm]	Deltam/z [Da]	a-c	RT [min]	First Scan	Spectrum File	Ions Matched	Ions Score	Identity Strict	Identity Relaxed	Expectation Value	XCorr	Percolator q-Value	Percolator PEP
High	TRUE		P07237	Sequest HT (A4)	1.31319	0.000880304	a-c	36.3235	5846	A_IyII_1-3.raw	0/0					4.14251	0	0.02249
High	TRUE		P07237	Mascot (A2)	1.31319	0.000880304	a-c	36.3235	5846	A_IyII_1-3.raw	17/264	16.92	44	37	5.79933		0	0.02564
EYTAGREADDIVNWLK	High		P07237		0.02335		a-c
Confidence	Checked		Master Protein Accessions	Identifying Node	DeltaM [ppm]	Deltam/z [Da]	a-c	RT [min]	First Scan	Spectrum File	Ions Matched	Ions Score	Identity Strict	Identity Relaxed	Expectation Value	XCorr	Percolator q-Value	Percolator PEP
High	TRUE		P07237	Sequest HT (A4)	0.921821	0.000577649	a-c	38.9259	6386	A_IyII_1-3.raw	0/0					3.05045	0	0.02335
NNFEGEVTKENLLDFIK	High		P07237		0.004414		a-c
Confidence	Checked		Master Protein Accessions	Identifying Node	DeltaM [ppm]	Deltam/z [Da]	a-c	RT [min]	First Scan	Spectrum File	Ions Matched	Ions Score	Identity Strict	Identity Relaxed	Expectation Value	XCorr	Percolator q-Value	Percolator PEP
High	TRUE		P07237	Sequest HT (A4)	0.946095	0.000633889	a-c	40.8659	6788	A_IyII_1-3.raw	0/0					4.65439	0	0.004414
High	TRUE		P07237	Mascot (A2)	0.946095	0.000633889	a-c	40.8659	6788	A_IyII_1-3.raw	25/192	27.64	46	39	0.796106		0	0.02665
ILFIFIDSDHTDNQR	High		P07237		0.003651		a-c
Confidence	Checked		Master Protein Accessions	Identifying Node	DeltaM [ppm]	Deltam/z [Da]	a-c	RT [min]	First Scan	Spectrum File	Ions Matched	Ions Score	Identity Strict	Identity Relaxed	Expectation Value	XCorr	Percolator q-Value	Percolator PEP
High	TRUE		P07237	Sequest HT (A4)	1.27018	0.000776465	a-c	40.4144	6695	A_IyII_1-3.raw	0/0					4.81319	0	0.003651
High	TRUE		P07237	Mascot (A2)	1.27018	0.000776465	a-c	40.4144	6695	A_IyII_1-3.raw	11/120	49.78	46	39	0.00514515		0	0.0004454
MDSTANEVEAVKVHSFPTLK	High		P07237		0.009831		a-c
Confidence	Checked		Master Protein Accessions	Identifying Node	DeltaM [ppm]	Deltam/z [Da]	a-c	RT [min]	First Scan	Spectrum File	Ions Matched	Ions Score	Identity Strict	Identity Relaxed	Expectation Value	XCorr	Percolator q-Value	Percolator PEP
High	TRUE		P07237	Sequest HT (A4)	0.643189	0.000472338	a-c	30.7373	4680	A_IyII_1-3.raw	0/0					2.79871	0	0.009831
High	TRUE		P07237	Mascot (A2)	0.643189	0.000472338	a-c	30.7373	4680	A_IyII_1-3.raw	12/208	16.79	46	39	10.4371		0	0.01955
EADDIVNWLK	High		P07237		0.07713		a-c
Confidence	Checked		Master Protein Accessions	Identifying Node	DeltaM [ppm]	Deltam/z [Da]	a-c	RT [min]	First Scan	Spectrum File	Ions Matched	Ions Score	Identity Strict	Identity Relaxed	Expectation Value	XCorr	Percolator q-Value	Percolator PEP
High	TRUE		P07237	Sequest HT (A4)	0.585088	0.000351815	a-c	40.8852	6792	A_IyII_1-3.raw	0/0					2.95155	0	0.07713
High	TRUE		P07237	Mascot (A2)	0.585088	0.000351815	a-c	40.8852	6792	A_IyII_1-3.raw	7/84	36.07	45	38	0.0814804		0.004235	0.1182
Legumain OS=Macaca fascicularis GN=LGMN PE=2 SV=1	Q4R4T8	Macaca fascicularis	49.406	3.9261	28.09	1	a-c
Sequence	Confidence		Master Protein Accessions	Modifications	Percolator PEP Sequest HT		a-c
GPHLVQSDGTVPFWAHAGNAIPSSDQIR	High		P49257		0.01149		a-c
Confidence	Checked		Master Protein Accessions	Identifying Node	DeltaM [ppm]	Deltam/z [Da]	a-c	RT [min]	First Scan	Spectrum File	Ions Matched	Ions Score	Identity Strict	Identity Relaxed	Expectation Value	XCorr	Percolator q-Value	Percolator PEP
High	TRUE		P49257	Sequest HT (A4)	1.3095	0.00129094	a-c	35.4514	5665	A_IyII_1-3.raw	0/0					4.33684	0	0.01149
High	TRUE		P49257	Mascot (A2)	1.3095	0.00129094	a-c	35.4514	5665	A_IyII_1-3.raw	17/304	26.27	47	40	1.19228		0	0.01923
YSFKGPHLVQSDGTVPFWAHAGNAIPSSDQIR	High		P49257		0.001778		a-c
Confidence	Checked		Master Protein Accessions	Identifying Node	DeltaM [ppm]	Deltam/z [Da]	a-c	RT [min]	First Scan	Spectrum File	Ions Matched	Ions Score	Identity Strict	Identity Relaxed	Expectation Value	XCorr	Percolator q-Value	Percolator PEP
High	TRUE		P49257	Sequest HT (A4)	2.38587	0.00207733	a-c	36.218	5824	A_IyII_1-3.raw	0/0					6.14345	0	0.001778
High	TRUE		P49257	Mascot (A2)	2.38587	0.00207733	a-c	36.218	5824	A_IyII_1-3.raw	26/360	60.01	46	39	0.000489921		0	2.131e-05
NNPAIVIIGNNGQIHYDHQNDGASQALASCQR	High		P49257	1xCarbamidomethyl [C30]			a-c
Confidence	Checked		Master Protein Accessions	Identifying Node	DeltaM [ppm]	Deltam/z [Da]	a-c	RT [min]	First Scan	Spectrum File	Ions Matched	Ions Score	Identity Strict	Identity Relaxed	Expectation Value	XCorr	Percolator q-Value	Percolator PEP
High	TRUE		P49257	Mascot (A2)	1.99192	0.00230773	a-c	31.1977	4777	A_IyII_1-3.raw	8/372	16.09	46	39	10.6743		0.001533	0.03664
Sequence	Confidence		Master Protein Accessions	Modifications	Percolator PEP Sequest HT		a-c
VIRSPADLIR	High		Q13438; Q3MHX6		0.07566		a-c
Confidence	Checked		Master Protein Accessions	Identifying Node	DeltaM [ppm]	Deltam/z [Da]	a-c	RT [min]	First Scan	Spectrum File	Ions Matched	Ions Score	Identity Strict	Identity Relaxed	Expectation Value	XCorr	Percolator q-Value	Percolator PEP
High	TRUE		Q13438; Q3MHX6	Sequest HT (A4)	-0.0802831	-3.04993e-05	a-c	28.1613	4148	A_IyII_1-3.raw	0/0					1.66078	0	0.07566
YGIEILPLPVMGGQSQASDVVIVSSK	High		Q3MHX6		0.1033		a-c
Confidence	Checked		Master Protein Accessions	Identifying Node	DeltaM [ppm]	Deltam/z [Da]	a-c	RT [min]	First Scan	Spectrum File	Ions Matched	Ions Score	Identity Strict	Identity Relaxed	Expectation Value	XCorr	Percolator q-Value	Percolator PEP
High	TRUE		Q3MHX6	Sequest HT (A4)	0.173538	0.000155457	a-c	66.0672	11866	A_IyII_1-3.raw	0/0					3.2055	0.001107	0.1033
High	TRUE		Q3MHX6	Mascot (A2)	0.173538	0.000155457	a-c	66.0672	11866	A_IyII_1-3.raw	8/248	5.6	45	38	91.6194		0.006202	0.1856
Sequence	Confidence		Master Protein Accessions	Modifications	Percolator PEP Sequest HT		a-c
QIIQQNPSLLPALLQQIGR	High		P54728		0.07886		a-c
Confidence	Checked		Master Protein Accessions	Identifying Node	DeltaM [ppm]	Deltam/z [Da]	a-c	RT [min]	First Scan	Spectrum File	Ions Matched	Ions Score	Identity Strict	Identity Relaxed	Expectation Value	XCorr	Percolator q-Value	Percolator PEP
High	TRUE		P54728	Sequest HT (A4)	0.661451	0.000469683	a-c	62.5829	11164	A_IyII_1-3.raw	0/0					2.32121	0	0.07886
Sequence	Confidence		Master Protein Accessions	Modifications	Percolator PEP Sequest HT		a-c
VVTVFSVADGYSENNVFYGHHAK	High		O75083		0.002519		a-c
Confidence	Checked		Master Protein Accessions	Identifying Node	DeltaM [ppm]	Deltam/z [Da]	a-c	RT [min]	First Scan	Spectrum File	Ions Matched	Ions Score	Identity Strict	Identity Relaxed	Expectation Value	XCorr	Percolator q-Value	Percolator PEP
High	TRUE		O75083	Sequest HT (A4)	1.01588	0.000645137	a-c	35.3591	5646	A_IyII_1-3.raw	0/0					5.49741	0	0.002519
High	TRUE		O75083	Mascot (A2)	1.01588	0.000645137	a-c	35.3591	5646	A_IyII_1-3.raw	22/212	40.69	46	39	0.0408763		0	0.0008339
LYSILGTTLKDEGK	High		O75083		0.00828		a-c
Confidence	Checked		Master Protein Accessions	Identifying Node	DeltaM [ppm]	Deltam/z [Da]	a-c	RT [min]	First Scan	Spectrum File	Ions Matched	Ions Score	Identity Strict	Identity Relaxed	Expectation Value	XCorr	Percolator q-Value	Percolator PEP
High	TRUE		O75083	Sequest HT (A4)	0.795205	0.000407635	a-c	31.8179	4907	A_IyII_1-3.raw	0/0					3.67659	0	0.00828
High	TRUE		O75083	Mascot (A2)	0.795205	0.000407635	a-c	31.8179	4907	A_IyII_1-3.raw	16/120	32.45	43	36	0.14227		0	0.004625
NIDNPAIADIYTEHAHQVVVAK	High		O75083		0.0001969		a-c
Confidence	Checked		Master Protein Accessions	Identifying Node	DeltaM [ppm]	Deltam/z [Da]	a-c	RT [min]	First Scan	Spectrum File	Ions Matched	Ions Score	Identity Strict	Identity Relaxed	Expectation Value	XCorr	Percolator q-Value	Percolator PEP
High	TRUE		O75083	Sequest HT (A4)	0.266274	0.000160979	a-c	31.5918	4860	A_IyII_1-3.raw	0/0					5.38665	0	0.0001969
High	TRUE		O75083	Mascot (A2)	0.266274	0.000160979	a-c	31.5918	4860	A_IyII_1-3.raw	22/252	52.24	47	40	0.00305801		0	7.499e-05
SYIYSGSHDGHINYWDSETGENDSFAGK	High		O75083		0.01038		a-c
Confidence	Checked		Master Protein Accessions	Identifying Node	DeltaM [ppm]	Deltam/z [Da]	a-c	RT [min]	First Scan	Spectrum File	Ions Matched	Ions Score	Identity Strict	Identity Relaxed	Expectation Value	XCorr	Percolator q-Value	Percolator PEP
High	TRUE		O75083	Sequest HT (A4)	0.423763	0.000332264	a-c	31.3443	4808	A_IyII_1-3.raw	0/0					4.30384	0	0.01038
High	TRUE		O75083	Mascot (A2)	0.423763	0.000332264	a-c	31.3443	4808	A_IyII_1-3.raw	11/276	24.16	37	30	0.195499		0	0.01231
Furin OS=Macaca mulatta GN=FURIN PE=2 SV=1	G7MVY8	Macaca mulatta	86.652	34.005	925.375	20	a-c
Serum albumin OS=Macaca mulatta GN=ALB PE=4 SV=1	F7HCH2	Macaca mulatta	68.829	20.3947	570.151	14	a-c
Sequence	Confidence		Master Protein Accessions	Modifications	Percolator PEP Sequest HT		a-c
NVIPALELVEPIKK	High		F7GVI7		0.09488		a-c
Confidence	Checked		Master Protein Accessions	Identifying Node	DeltaM [ppm]	Deltam/z [Da]	a-c	RT [min]	First Scan	Spectrum File	Ions Matched	Ions Score	Identity Strict	Identity Relaxed	Expectation Value	XCorr	Percolator q-Value	Percolator PEP
High	TRUE		F7GVI7	Mascot (A2)	0.955031	0.000497556	a-c	37.4756	6087	A_IyII_1-3.raw	6/156	35.44	23	16	0.000571518		0	0.05846
High	TRUE		F7GVI7	Sequest HT (A4)	0.955031	0.000497556	a-c	37.4756	6087	A_IyII_1-3.raw	0/0					3.7184	0	0.09488
SDVYCEVCEFLVK	High		F7GVI7	2xCarbamidomethyl [C5; C8]	0.0004864		a-c
Confidence	Checked		Master Protein Accessions	Identifying Node	DeltaM [ppm]	Deltam/z [Da]	a-c	RT [min]	First Scan	Spectrum File	Ions Matched	Ions Score	Identity Strict	Identity Relaxed	Expectation Value	XCorr	Percolator q-Value	Percolator PEP
High	TRUE		F7GVI7	Sequest HT (A4)	0.518009	0.000426772	a-c	43.851	7398	A_IyII_1-3.raw	0/0					4.88343	0	0.0004864
High	TRUE		F7GVI7	Mascot (A2)	0.518009	0.000426772	a-c	43.851	7398	A_IyII_1-3.raw	10/96	52.34	32	25	9.2476e-05		0	0.0021
NVIPALELVEPIK	High		F7GVI7		0.01031		a-c
Confidence	Checked		Master Protein Accessions	Identifying Node	DeltaM [ppm]	Deltam/z [Da]	a-c	RT [min]	First Scan	Spectrum File	Ions Matched	Ions Score	Identity Strict	Identity Relaxed	Expectation Value	XCorr	Percolator q-Value	Percolator PEP
High	TRUE		F7GVI7	Mascot (A2)	0.576353	0.000413492	a-c	44.3398	7497	A_IyII_1-3.raw	9/144	36.13	25	18	0.000841045		0	0.004899
High	TRUE		F7GVI7	Sequest HT (A4)	0.576353	0.000413492	a-c	44.3398	7497	A_IyII_1-3.raw	0/0					3.22165	0	0.01031
DNATEEEILVYLEK	High		F7GVI7		0.001372		a-c
Confidence	Checked		Master Protein Accessions	Identifying Node	DeltaM [ppm]	Deltam/z [Da]	a-c	RT [min]	First Scan	Spectrum File	Ions Matched	Ions Score	Identity Strict	Identity Relaxed	Expectation Value	XCorr	Percolator q-Value	Percolator PEP
High	TRUE		F7GVI7	Mascot (A2)	1.71665	0.00142982	a-c	50.2332	8690	A_IyII_1-3.raw	9/152	53.9	35	28	0.000145231		0	0.0006435
High	TRUE		F7GVI7	Sequest HT (A4)	1.71665	0.00142982	a-c	50.2332	8690	A_IyII_1-3.raw	0/0					3.75028	0	0.001372
LPALTVHVTQPK	High		F7GVI7		0.01058		a-c
Confidence	Checked		Master Protein Accessions	Identifying Node	DeltaM [ppm]	Deltam/z [Da]	a-c	RT [min]	First Scan	Spectrum File	Ions Matched	Ions Score	Identity Strict	Identity Relaxed	Expectation Value	XCorr	Percolator q-Value	Percolator PEP
High	TRUE		F7GVI7	Mascot (A2)	0.850886	0.000369787	a-c	26.6403	3838	A_IyII_1-3.raw	6/96	36.83	28	21	0.00151469		0	0.006421
[truncated: 161 more rows]

## Sheet: biological process
Accession	Description	Biological Process	Cell communication	Cell organization and biogenesis	Cell proliferation	Cell deth	cellular homeostasis	coagulation	metabolic process	regulacion of biological process	response to stimulus	transport	defence response				% de proteínas con esa función
P11021	78 kDa glucose-regulated protein OS=Homo sapiens GN=HSPA5 PE=1 SV=2	cell communication;cell organization and biogenesis;coagulation;metabolic process;regulation of biological process;response to stimulus;transport	1	1	0	0	0	1	1	1	1	1	0		Cell communication	7	1.96078			Cell communication	1.96078
P35527	Keratin, type I cytoskeletal 9 OS=Homo sapiens GN=KRT9 PE=1 SV=3	cell organization and biogenesis	0	1	0	0	0	0	0	0	0	0	0		Cell organization and biogenesis	43	12.0448			Cell organization and biogenesis	12.0448
P80303	Nucleobindin-2 OS=Homo sapiens GN=NUCB2 PE=1 SV=2		0	0	0	0	0	0	1	0	0	0	0		Cell proliferation	9	2.52101			Cell proliferation	2.52101
P13645	Keratin, type I cytoskeletal 10 OS=Homo sapiens GN=KRT10 PE=1 SV=6	cell differentiation;response to stimulus	0	0	0	0	0	0	0	0	1	0	0		Cell deth	10	2.80112			Cell deth	2.80112
P04264	Keratin, type II cytoskeletal 1 OS=Homo sapiens GN=KRT1 PE=1 SV=6	defense response;metabolic process;regulation of biological process;response to stimulus;transport	0	0	0	0	0	0	1	1	1	1	0		Cellular homeostasis	8	2.2409			Cellular homeostasis	2.2409
P22079	Lactoperoxidase OS=Homo sapiens GN=LPO PE=1 SV=2	defense response;metabolic process;response to stimulus	0	0	0	0	0	0	1	0	1	0	1		Coagulation	19	5.32213			Coagulation	5.32213
Q2I6W4	Catalase OS=Callithrix jacchus GN=CAT PE=2 SV=3	metabolic process;regulation of biological process;response to stimulus	0	0	0	0	0	0	1	1	1	0	0		Metabolic process	82	22.9692			Metabolic process	22.9692
P06733	Alpha-enolase OS=Homo sapiens GN=ENO1 PE=1 SV=2	metabolic process;regulation of biological process;response to stimulus	0	0	0	0	0	0	1	1	1	1	0		Regulacion of biological process	67	18.7675			Regulacion of biological process	18.7675
Q5R7D3	Heat shock 70 kDa protein 1 OS=Pongo abelii GN=HSPA1 PE=2 SV=1	cell organization and biogenesis;response to stimulus	0	1	0	0	0	0	0	0	1	0	0		Response to stimulus	54	15.1261			Response to stimulus	15.1261
P02538	Keratin, type II cytoskeletal 6A OS=Homo sapiens GN=KRT6A PE=1 SV=3	cell differentiation;cell organization and biogenesis;regulation of biological process	0	1	0	0	0	0	0	1	1	0	0		Transport	37	10.3641			Transport	10.3641
Q5R1W6	Transketolase OS=Pan troglodytes GN=TKT PE=2 SV=1	metabolic process	0	0	0	0	0	0	1	0	0	0	0		Defence response	21	5.88235			Defence response	5.88235
P35908	Keratin, type II cytoskeletal 2 epidermal OS=Homo sapiens GN=KRT2 PE=1 SV=2	cell proliferation;cellular component movement	0	1	1	0	0	0	0	0	0	0	0		total	357	100
P02788	Lactotransferrin OS=Homo sapiens GN=LTF PE=1 SV=6	cell organization and biogenesis;cellular homeostasis;defense response;metabolic process;regulation of biological process;response to stimulus;transport	0	1	0	0	1	0	1	1	1	1	1
Q02818	Nucleobindin-1 OS=Homo sapiens GN=NUCB1 PE=1 SV=4	regulation of biological process;response to stimulus	0	0	0	0	0	0	0	1	0	1	0
P13796	Plastin-2 OS=Homo sapiens GN=LCP1 PE=1 SV=6	cell organization and biogenesis;cellular component movement;regulation of biological process;response to stimulus	0	0	0	0	0	0	0	0	0	0	0
A5A6I6	Serotransferrin OS=Pan troglodytes GN=TF PE=2 SV=1	cellular homeostasis;transport	0	0	0	0	1	0	0	0	0	1	0
Q96HE7	ERO1-like protein alpha OS=Homo sapiens GN=ERO1A PE=1 SV=2	cell death;cell differentiation;cell organization and biogenesis;cellular homeostasis;metabolic process;regulation of biological process;response to stimulus;transport	0	1	0	1	1	0	1	1	1	1	0
P13646	Keratin, type I cytoskeletal 13 OS=Homo sapiens GN=KRT13 PE=1 SV=4	cell organization and biogenesis;response to stimulus	0	1	0	0	0	0	0	1	1	0	0
P06744	Glucose-6-phosphate isomerase OS=Homo sapiens GN=GPI PE=1 SV=4	metabolic process;regulation of biological process;response to stimulus	0	0	0	0	0	0	1	1	1	0	0
P14314	Glucosidase 2 subunit beta OS=Homo sapiens GN=PRKCSH PE=1 SV=2	cell organization and biogenesis;defense response;metabolic process;regulation of biological process;response to stimulus	0	1	0	0	0	0	1	1	1	0	1
P02533	Keratin, type I cytoskeletal 14 OS=Homo sapiens GN=KRT14 PE=1 SV=4	cell differentiation;cell organization and biogenesis;response to stimulus	0	1	0	0	0	0	0	0	1	0	0
P30838	Aldehyde dehydrogenase, dimeric NADP-preferring OS=Homo sapiens GN=ALDH3A1 PE=1 SV=3	metabolic process;regulation of biological process;response to stimulus	0	0	0	0	0	0	1	1	1	0	0
Q6ZN66	Guanylate-binding protein 6 OS=Homo sapiens GN=GBP6 PE=2 SV=1	defense response;metabolic process;response to stimulus	0	0	0	0	0	0	1	0	1	0	1
P07602	Prosaposin OS=Homo sapiens GN=PSAP PE=1 SV=2	cell differentiation;coagulation;metabolic process;regulation of biological process;response to stimulus;transport	0	0	0	0	0	1	1	1	1	1	0
P15144	Aminopeptidase N OS=Homo sapiens GN=ANPEP PE=1 SV=4	cell differentiation;development;metabolic process;response to stimulus	0	1	0	0	0	1	0	0	0	0	0
P01024	Complement C3 OS=Homo sapiens GN=C3 PE=1 SV=2	coagulation;defense response;metabolic process;regulation of biological process;response to stimulus	0	0	0	0	0	1	1	1	1	0	0
Q13217	DnaJ homolog subfamily C member 3 OS=Homo sapiens GN=DNAJC3 PE=1 SV=1	defense response;metabolic process;regulation of biological process;response to stimulus	0	0	0	0	0	0	1	1	1	0	1
P06396	Gelsolin OS=Homo sapiens GN=GSN PE=1 SV=1	cell death;cell organization and biogenesis;metabolic process;regulation of biological process;response to stimulus;transport	0	1	0	1	0	0	1	1	1	1	0
P19013	Keratin, type II cytoskeletal 4 OS=Homo sapiens GN=KRT4 PE=1 SV=4	cell differentiation;cell organization and biogenesis;regulation of biological process	0	1	0	0	0	0	0	1	0	0	0
O75083	WD repeat-containing protein 1 OS=Homo sapiens GN=WDR1 PE=1 SV=4	cell organization and biogenesis;coagulation;regulation of biological process;transport	0	1	0	0	0	1	0	1	0	1	0
P31939	Bifunctional purine biosynthesis protein PURH OS=Homo sapiens GN=ATIC PE=1 SV=3	metabolic process;response to stimulus	0	0	0	0	0	0	1	0	1	0	0
Q8TDL5	BPI fold-containing family B member 1 OS=Homo sapiens GN=BPIFB1 PE=1 SV=1	defense response;regulation of biological process;response to stimulus	0	0	0	0	0	0	0	1	1	0	1
P15311	Ezrin OS=Homo sapiens GN=EZR PE=1 SV=4	cell differentiation;cell organization and biogenesis;cellular component movement;metabolic process;regulation of biological process;response to stimulus;transport	0	1	0	0	0	0	1	1	0	1	0
P04196	Histidine-rich glycoprotein OS=Homo sapiens GN=HRG PE=1 SV=1	coagulation;defense response;regulation of biological process;response to stimulus;transport	0	0	0	0	0	1	0	1	1	1	1
P49257	Protein ERGIC-53 OS=Homo sapiens GN=LMAN1 PE=1 SV=2	cell organization and biogenesis;coagulation;metabolic process;regulation of biological process;transport	0	1	0	0	0	1	1	1	0	1	0
H2N4I1	Sulfhydryl oxidase 1 OS=Pongo abelii GN=QSOX1 PE=3 SV=2	cellular homeostasis;metabolic process;regulation of biological process	0	0	0	0	1	0	1	1	0	0	0
P01008	Antithrombin-III OS=Homo sapiens GN=SERPINC1 PE=1 SV=1	coagulation;regulation of biological process;response to stimulus	0	0	0	0	0	1	0	1	1	0	0
P43251	Biotinidase OS=Homo sapiens GN=BTD PE=1 SV=2	metabolic process	0	0	0	0	0	0	1	0	0	0	0
P10909	Clusterin OS=Homo sapiens GN=CLU PE=1 SV=1	cell death;cell organization and biogenesis;cell proliferation;coagulation;defense response;metabolic process;regulation of biological process;response to stimulus;transport	0	1	0	1	0	1	1	1	1	1	1
P0C0L4	Complement C4-A OS=Homo sapiens GN=C4A PE=1 SV=2	defense response;metabolic process;regulation of biological process;response to stimulus	0	0	0	0	0	0	1	1	1	0	1
P01871	Ig mu chain C region OS=Homo sapiens GN=IGHM PE=1 SV=3	cell organization and biogenesis;defense response;metabolic process;regulation of biological process;response to stimulus;transport	0	1	0	0	0	0	1	1	1	1	1
Q6IE36	Ovostatin homolog 2 OS=Homo sapiens GN=OVOS2 PE=2 SV=2	regulation of biological process	0	0	0	0	0	0	0	1	0	0	1
Q9UBG3	Cornulin OS=Homo sapiens GN=CRNN PE=1 SV=1	response to stimulus	0	0	0	0	0	0	0	0	1	0	0
P14923	Junction plakoglobin OS=Homo sapiens GN=JUP PE=1 SV=3	cell communication;cell organization and biogenesis;cellular component movement;regulation of biological process;response to stimulus	1	1	0	0	0	0	0	1	1	0	0
Q4R4T8	Legumain OS=Macaca fascicularis GN=LGMN PE=2 SV=1	metabolic process;regulation of biological process	0	0	0	0	0	0	0	1	1	0	0
G7MVY8	Furin OS=Macaca mulatta GN=FURIN PE=2 SV=1	cell proliferation;metabolic process;regulation of biological process;transport	0	0	0	0	0	0	1	1	0	1	0
F7HCH2	Serum albumin OS=Macaca mulatta GN=ALB PE=4 SV=1	cell communication;regulation of biological process;response to stimulus;transport	1	0	0	0	0	0	0	1	0	1	0
F6RLH5	Heat shock cognate 71 kDa protein isoform 1 OS=Macaca mulatta GN=HSPA8 PE=2 SV=1	cell organization and biogenesis;metabolic process;regulation of biological process;response to stimulus	0	1	0	0	0	0	1	1	1	0	0
F7F0E8	Pyruvate kinase OS=Macaca mulatta GN=PKM PE=3 SV=1	metabolic process	0	0	0	0	0	0	1	0	0	0	0
F6RRV0	Serine/threonine-protein phosphatase 2A 65 kDa regulatory subunit A alpha isoform OS=Macaca mulatta GN=PPP2R1A PE=2 SV=1	cell organization and biogenesis;metabolic process;regulation of biological process	0	1	0	0	0	0	1	1	0	0	0
F7GYM9	Plastin-3 isoform 1 OS=Macaca mulatta GN=PLS3 PE=2 SV=1	CALCIO BINDING	0	0	0	0	0	0	0	0	0	0	0
F7FMQ2	CRP55 OS=Macaca mulatta GN=CALR PE=2 SV=1	cell organization and biogenesis;metabolic process;regulation of biological process;response to stimulus;transport	0	1	0	0	0	0	1	1	0	1	0
F7H193	Leukotriene A(4) hydrolase OS=Macaca mulatta GN=LTA4H PE=3 SV=1	metabolic process	0	0	0	0	0	0	1	0	0	0	0
F7EZT6	Endoplasmin OS=Macaca mulatta GN=HSP90B1 PE=2 SV=1	cell organization and biogenesis;metabolic process;regulation of biological process;response to stimulus	0	1	0	0	0	0	1	1	1	0	0
F7C1B5	Aldehyde dehydrogenase OS=Macaca mulatta GN=ALDH3A2 PE=3 SV=1	metabolic process	0	0	0	0	0	0	1	0	0	0	0
F7H7V0	Desmoplakin-3 OS=Macaca mulatta GN=JUP PE=2 SV=1	cell communication;cell organization and biogenesis;cellular component movement;regulation of biological process;response to stimulus	1	1	0	0	0	0	0	1	1	0	0
F6W5A7	Matrix metalloproteinase-9 OS=Macaca mulatta GN=MMP9 PE=2 SV=1	cell organization and biogenesis;cellular component movement;metabolic process;regulation of biological process	0	1	0	0	0	0	1	1	0	0	0
F7BCV3	Endoplasmic reticulum lectin 1 isoform 1 OS=Macaca mulatta GN=ERLEC1 PE=2 SV=1	metabolic process	0	0	0	0	0	0	1	0	0	0	0
Q9H173	Nucleotide exchange factor SIL1 OS=Homo sapiens GN=SIL1 PE=1 SV=1	metabolic process;regulation of biological process;transport	0	0	0	0	0	1	1	0	1	0	0
B1MTB7	Serpin B5 OS=Callicebus moloch GN=SERPINB5 PE=3 SV=1	regulation of biological process	0	0	0	0	0	0	1	0	0	0	0
P50417	Haptoglobin OS=Ateles geoffroyi GN=HP PE=2 SV=1	defense response;metabolic process;response to stimulus	0	0	0	0	0	1		1	0	1	0
O43813	LanC-like protein 1 OS=Homo sapiens GN=LANCL1 PE=1 SV=1	metabolic process;regulation of biological process;response to stimulus	0	0	0	0	0	1	1	1	0	0	0
A5A6I5	Fructose-bisphosphate aldolase A OS=Pan troglodytes GN=ALDOA PE=2 SV=1	cell organization and biogenesis;metabolic process	1	0	0	0	0	1		0	0	0	0
P30740	Leukocyte elastase inhibitor OS=Homo sapiens GN=SERPINB1 PE=1 SV=1	regulation of biological process	0	0	0	0	0		1	0	0	0	0
Q92820	Gamma-glutamyl hydrolase OS=Homo sapiens GN=GGH PE=1 SV=2	metabolic process;response to stimulus	0	0	0	0	0	1		1	0	0	0
P40394	Alcohol dehydrogenase class 4 mu/sigma chain OS=Homo sapiens GN=ADH7 PE=1 SV=2	metabolic process;regulation of biological process;response to stimulus	0	0	0	0	0	1	1	0	1	0	0
P07858	Cathepsin B OS=Homo sapiens GN=CTSB PE=1 SV=3	cell differentiation;cell organization and biogenesis;defense response;metabolic process;regulation of biological process;response to stimulus	1	0	0	0	0	1	1	1	0	1	0
P13647	Keratin, type II cytoskeletal 5 OS=Homo sapiens GN=KRT5 PE=1 SV=3	cell organization and biogenesis	1	0	0	0	0	0	0	0	0	0	0
P23280	Carbonic anhydrase 6 OS=Homo sapiens GN=CA6 PE=1 SV=3	metabolic process;response to stimulus;transport	0	0	0	0	0	0	1	0	1	1	0
P40926	Malate dehydrogenase, mitochondrial OS=Homo sapiens GN=MDH2 PE=1 SV=3	metabolic process	0	0	0	0	0	0	1	0	0	0	0
P06753	Tropomyosin alpha-3 chain OS=Homo sapiens GN=TPM3 PE=1 SV=2	cellular component movement	0	0	1	0	0	0	0	0	0	0	0
P10909	Clusterin OS=Homo sapiens GN=CLU PE=1 SV=1	cell death;cell organization and biogenesis;cell proliferation;coagulation;defense response;metabolic process;regulation of biological process;response to stimulus;transport	0	1	1	1	0	1	1	1	1	1	1
P07951	Tropomyosin beta chain OS=Homo sapiens GN=TPM2 PE=1 SV=1	cellular component movement;regulation of biological process	0	0	1		0	0	0	1	0	0	0
P24855	Deoxyribonuclease-1 OS=Homo sapiens GN=DNASE1 PE=1 SV=1	cell death;metabolic process	0	0	0	1	0	0	1	0	0	0	0
P07996	Thrombospondin-1 OS=Homo sapiens GN=THBS1 PE=1 SV=2	cell organization and biogenesis;cellular component movement;coagulation;defense response;metabolic process;regulation of biological process;response to stimulus;transport	0	1	1	0	0	1	1	1	1	1	1
O60218	Aldo-keto reductase family 1 member B10 OS=Homo sapiens GN=AKR1B10 PE=1 SV=2	metabolic process;regulation of biological process;response to stimulus	0	0	0	0	0	0	1	1	0	0	0
Q5T2L2	Putative aldo-keto reductase family 1 member C8 OS=Homo sapiens GN=AKR1C8P PE=5 SV=2	metabolic process	0	0	0	0	0	0	1	0	0	0	0
O00584	Ribonuclease T2 OS=Homo sapiens GN=RNASET2 PE=1 SV=2	metabolic process	0	0	0	0	0	0	1	0	0	0	0
A5A6N7	L-lactate dehydrogenase B chain OS=Pan troglodytes GN=LDHB PE=2 SV=1	metabolic process	0	0	0	0	0	0	1	0	0	0	0
P04264	Keratin, type II cytoskeletal 1 OS=Homo sapiens GN=KRT1 PE=1 SV=6	defense response;metabolic process;regulation of biological process;response to stimulus;transport	0	0	0	0	0	0	1	1	1	1	1
P35908	Keratin, type II cytoskeletal 2 epidermal OS=Homo sapiens GN=KRT2 PE=1 SV=2	cell proliferation;cellular component movement	0	1	1	0	0	0	0	0	0	0	0
P02533	Keratin, type I cytoskeletal 14 OS=Homo sapiens GN=KRT14 PE=1 SV=4	cell differentiation;cell organization and biogenesis;response to stimulus	0	1	1	0	0	0	0	0	1	0	0
Q6DTV9	Peptidyl-prolyl cis-trans isomerase A OS=Aotus trivirgatus GN=PPIA PE=2 SV=3	metabolic process;regulation of biological process	0	0	0	0	0	0	1	1	0	0	0
P02538	Keratin, type II cytoskeletal 6A OS=Homo sapiens GN=KRT6A PE=1 SV=3	cell differentiation;cell organization and biogenesis;regulation of biological process	0	1	1	0	0	0	0	1	0	0	0
P23284	Peptidyl-prolyl cis-trans isomerase B OS=Homo sapiens GN=PPIB PE=1 SV=2	cell organization and biogenesis;metabolic process;regulation of biological process	0	1	0	0	0	0	1	1	0	0	0
P28325	Cystatin-D OS=Homo sapiens GN=CST5 PE=1 SV=1	regulation of biological process	0	0	0	0	0	0	0	1	0	0	0
Q16769	Glutaminyl-peptide cyclotransferase OS=Homo sapiens GN=QPCT PE=1 SV=1	metabolic process	0	0	0	0	0	0	1	0	0	0	0
Q9NQX5	Neural proliferation differentiation and control protein 1 OS=Homo sapiens GN=NPDC1 PE=1 SV=2		0	0	0	0	0	0	0	0	0	0	0
Q5JXB2	Putative ubiquitin-conjugating enzyme E2 N-like OS=Homo sapiens GN=UBE2NL PE=1 SV=1	metabolic process	0	0	0	0	0	0	1	0	0	0	0
Q96DA0	Zymogen granule protein 16 homolog B OS=Homo sapiens GN=ZG16B PE=1 SV=3		0	0	0	0	0	0	0	0	0	0	0
Q7RTS7	Keratin, type II cytoskeletal 74 OS=Homo sapiens GN=KRT74 PE=1 SV=2	cell organization and biogenesis	0	1	0	0	0	0	0	0	0	0	0
P04406	Glyceraldehyde-3-phosphate dehydrogenase OS=Homo sapiens GN=GAPDH PE=1 SV=3	cell death;cell organization and biogenesis;metabolic process;regulation of biological process;response to stimulus	0	1	0	1	0	0	1	1	1	0	0
F7B786	Cytokeratin-1 OS=Macaca mulatta GN=KRT1 PE=3 SV=1	defense response;metabolic process;regulation of biological process;response to stimulus	0	0	0	0	0	0	1	1	1	0	1
F7E526	Uncharacterized protein OS=Macaca mulatta GN=LOC722990 PE=3 SV=1	metabolic process	0	0	0	0	0	0	1		0	0	0
F7GTQ0	Uncharacterized protein OS=Macaca mulatta GN=QPCT PE=4 SV=1	metabolic process	0	0	0	0	0	0	1	0	0	0	0
G7PUB9	Nucleoside diphosphate kinase OS=Macaca fascicularis GN=EGM_07722 PE=3 SV=1	metabolic process	0	0	0	0	0	0	1	0	0	0	0
G7PRG1	Putative uncharacterized protein OS=Macaca fascicularis GN=EGM_06639 PE=3 SV=1	transport	0	0	0	0	0	0		0	0	1	0
P81605	Dermcidin OS=Homo sapiens GN=DCD PE=1 SV=2	defense response;metabolic process;response to stimulus	0	0	0	0	0	0	1	0	1	0	1
P07737	Profilin-1 OS=Homo sapiens GN=PFN1 PE=1 SV=2	cell death;cell organization and biogenesis;coagulation;regulation of biological process;response to stimulus;transport	0	1	0	1	0	1	0	1	1	1	0
P29373	Cellular retinoic acid-binding protein 2 OS=Homo sapiens GN=CRABP2 PE=1 SV=2	metabolic process;regulation of biological process;response to stimulus;transport	0	0	0	0	0	0	1	1	1	1	0
Q01469	Fatty acid-binding protein, epidermal OS=Homo sapiens GN=FABP5 PE=1 SV=3	metabolic process;response to stimulus;transport	0	0	0	0	0	0	1	0	1	1	0
Q8I030	Cystatin-B OS=Pan troglodytes GN=CSTB PE=3 SV=1	regulation of biological process;response to stimulus	0	0	0	0	0	0	0	1	1	0	0
O19093	Cystatin-C OS=Saimiri sciureus GN=CST3 PE=2 SV=1	regulation of biological process	0	0	0	0	0	0	0	1	0	0	0
Q14697	Neutral alpha-glucosidase AB OS=Homo sapiens GN=GANAB PE=1 SV=3	metabolic process	0	0	0	0	0	0	1	0	0	0	0
P01040	Cystatin-A OS=Homo sapiens GN=CSTA PE=1 SV=1	cell differentiation;metabolic process;regulation of biological process	0	1	0	0	0	0	1	1	0	0	0
P27482	Calmodulin-like protein 3 OS=Homo sapiens GN=CALML3 PE=1 SV=2		0	0	0	0	0	0	0	0	0	0	0
Q1KLX0	Cathelicidin antimicrobial peptide OS=Saguinus oedipus GN=CAMP PE=3 SV=1	defense response;response to stimulus	0	0	0		0	0	0	0	1	0	1
Q5R9M3	Thioredoxin OS=Pongo abelii GN=TXN PE=3 SV=3	cellular homeostasis;metabolic process;regulation of biological process;response to stimulus;transport	0	0	0	0	1	0	1	1	1	1	0
P47929	Galectin-7 OS=Homo sapiens GN=LGALS7 PE=1 SV=2	cell death	0	0	0	1	0	0	0	0	0	0	0
P61561	Syncytin-1 OS=Gorilla gorilla gorilla GN=ERVW-1 PE=3 SV=1		0	0	0	0	0	0	0	0	0	0	0
P06768	Retinol-binding protein 2 OS=Rattus norvegicus GN=Rbp2 PE=1 SV=3	metabolic process;transport	0	0	0	0	0	0	1	0	0	1	0
O77523	Beta-2-microglobulin OS=Alouatta seniculus GN=B2M PE=3 SV=1		0	0	0	0	0	0	0	0	0	0	0
P25445	Tumor necrosis factor receptor superfamily member 6 OS=Homo sapiens GN=FAS PE=1 SV=1	cell death;cell organization and biogenesis;defense response;metabolic process;regulation of biological process;response to stimulus	0	1	0	1	0	0	1	1	1	0	1
G7PUP9	Cytokeratin-10 (Fragment) OS=Macaca fascicularis GN=EGM_07881 PE=3 SV=1		0	0	0	0	0	0	0	0	0	0	0
G7PQY2	Putative uncharacterized protein OS=Macaca fascicularis GN=EGM_05959 PE=3 SV=1	transport	0	0	0	0	0	0	0	0	0	1	0
G7PUP9	Cytokeratin-10 (Fragment) OS=Macaca fascicularis GN=EGM_07881 PE=3 SV=1		0	0	0	0	0	0	0	0	0	0	0
G7PID3	Cytokeratin-2e OS=Macaca fascicularis GN=EGM_03270 PE=3 SV=1		0	0	0	0	0	0	0	0	0	0	0
G7PUS5	Putative uncharacterized protein OS=Macaca fascicularis GN=EGM_07909 PE=3 SV=1		0	0	0	0	0	0	0	0	0	0	0
G7PQY3	Hemoglobin beta chain OS=Macaca fascicularis GN=EGM_05960 PE=3 SV=1	transport	0	0	0	0	0	0	0	0	0	1	0
G7PIC8	Cytokeratin-6C OS=Macaca fascicularis GN=EGM_03263 PE=3 SV=1		0	0	0	0	0	0	0	0	0	0	0
G7PID4	Cytokeratin-1B OS=Macaca fascicularis GN=EGM_03272 PE=3 SV=1	transport	0	0	0	0	0	0	0	0	0	1	0
G7P2N0	Histone H4 OS=Macaca fascicularis GN=EGM_03027 PE=3 SV=1	cell organization and biogenesis;metabolic process	0	1	0	0	0	0	1	0	0	0	0
G7PHX5	Putative uncharacterized protein OS=Macaca fascicularis GN=EGM_03325 PE=4 SV=1	metabolic process	0	0	0	0	0	0	1	0	0	0	0
G8F2G9	Putative uncharacterized protein OS=Macaca fascicularis GN=EGM_20828 PE=3 SV=1		0	0	0	0	0	0	0	0	0	0	0
G7P5L7	Putative uncharacterized protein OS=Macaca fascicularis GN=EGM_14426 PE=4 SV=1	transport	0	0	0	0	0	0	0	0	0	1	0
G7NY31	Putative uncharacterized protein OS=Macaca fascicularis GN=EGM_10710 PE=3 SV=1	cellular homeostasis;transport	0	0	0	0	1	0	0	0	0	1	0
G7NUG4	Protein S100 OS=Macaca fascicularis GN=EGM_01110 PE=3 SV=1		0	0	0	0	0	0	0	0	0	0	0
G7P7Z2	Thioltransferase-1 OS=Macaca fascicularis GN=EGM_15245 PE=4 SV=1	cellular homeostasis;metabolic process;regulation of biological process	0	0	0	0	1	0	1	1	0	0	0
G7PT41	Putative uncharacterized protein OS=Macaca fascicularis GN=EGM_08265 PE=3 SV=1		0	0	0	0	0	0	0	0	0	0	0
G7P2N4	Histone H1c OS=Macaca fascicularis GN=EGM_13318 PE=3 SV=1	cell organization and biogenesis	0	1	0	0	0	0	0	0	0	0	0
G7PGL4	Putative uncharacterized protein OS=Macaca fascicularis GN=EGM_02177 PE=4 SV=1		0	0	0	0	0	0	0	0	0	0	0
G7PUF6	Putative uncharacterized protein OS=Macaca fascicularis GN=EGM_07763 PE=4 SV=1	defense response;metabolic process;response to stimulus	0	0	0	0	0	0	1	0	1	0	1
G7PTX9	Transcription elongation factor SPT6 OS=Macaca fascicularis GN=EGM_07555 PE=4 SV=1	metabolic process;regulation of biological process	0	0	0	0	0	0	1	1	0	0	0
G7PWZ9	Polyubiquitin-C OS=Macaca fascicularis GN=EGM_09461 PE=4 SV=1	metabolic process	0	0	0	0	0	0	1	1	0	0	0
G7NZC8	Elongation factor 1-alpha OS=Macaca fascicularis GN=EGM_10569 PE=3 SV=1	metabolic process	0	0	0	0	0	0	1	0	0	0	0
P35908	Keratin, type II cytoskeletal 2 epidermal OS=Homo sapiens GN=KRT2 PE=1 SV=2	cell proliferation;cellular component movement	0	1	1	0	0	0	0	0	0	0
P05109	Protein S100-A8 OS=Homo sapiens GN=S100A8 PE=1 SV=1	cell death;cellular component movement;defense response;metabolic process;regulation of biological process;response to stimulus	0	0	0	1	0	0	1	1	1	0	1
P04259	Keratin, type II cytoskeletal 6B OS=Homo sapiens GN=KRT6B PE=1 SV=5		0	0	0	0	0	0	0	0	0	0	0
Q95M66	Beta-defensin 1 OS=Saguinus oedipus GN=DEFB1 PE=3 SV=1	defense response;response to stimulus	0	0	0	0	0	0	0	0	1	0	1
A0SXL6	Elongation factor 2 OS=Callithrix jacchus GN=EEF2 PE=2 SV=1	metabolic process	0	0	0	0	0	0	1	0	0	0	0
P06703	Protein S100-A6 OS=Homo sapiens GN=S100A6 PE=1 SV=1	cell organization and biogenesis;regulation of biological process;response to stimulus;transport	0	1	0	0	0	0	1	1	0	1	0
P35754	Glutaredoxin-1 OS=Homo sapiens GN=GLRX PE=1 SV=2	cellular homeostasis;metabolic process;regulation of biological process;transport	0	1	0	0	1	0	1	0	0	1	0
P54652	Heat shock-related 70 kDa protein 2 OS=Homo sapiens GN=HSPA2 PE=1 SV=1	nucleotide binding;protein binding	0	1	0	0	0	0	1	1	1	0	0
F6TDW8	Histone H2A (Fragment) OS=Macaca mulatta GN=LOC705636 PE=3 SV=1	DNA binding;protein binding	0	0	0	0	0	0	0	1	0	0	0
F7H2F8	Collectin subfamily member 11		0	0	0	0	0	0	0	0	0	0	0
F6THR5	Uncharacterized protein OS=Macaca mulatta GN=BPIFB1 PE=4 SV=1		0	0	0	0	0	0	0	0	0	0	0
Q6S8J3	POTE ankyrin domain family member E OS=Homo sapiens GN=POTEE PE=1 SV=3		0	0	0	0	0	0	0	0	0	0	0
G7PJP0	Gamma-enolase OS=Macaca fascicularis GN=EGM_02922 PE=3 SV=1	metabolic process	0	0	0	0	0	0	1	0	0	0	0
F6RSN8	Uncharacterized protein OS=Macaca mulatta GN=SDHA PE=4 SV=1	metabolic process	0	0	0	0	0	0	1	0	0	0	0
F6TII3	Uncharacterized protein OS=Macaca mulatta GN=LOC720706 PE=3 SV=1	cell organization and biogenesis	0	1	0	0	0	0	0	0	0	0	0
			7	43	9	10	8	19	82	67	54	37	21

## Sheet: molecular function
Accession	Description	Molecular Function	catalytic activity	structural molecule activity	antioxidant activity	motor activity	transporter activity	enzime regulator activity	receptor activity	metabolic process	RNA binding	DNA binding	metal ion binding	protein binding	nucleotide binding
P11021	78 kDa glucose-regulated protein OS=Homo sapiens GN=HSPA5 PE=1 SV=2	catalytic activity;metal ion binding;nucleotide binding;protein binding	1	0	0	0	0	0	0	0	0	0	1	1	1		1
P35527	Keratin, type I cytoskeletal 9 OS=Homo sapiens GN=KRT9 PE=1 SV=3	structural molecule activity	0	1	0	0	0	0	0	0	0	0	0	0	0		2
P80303	Nucleobindin-2 OS=Homo sapiens GN=NUCB2 PE=1 SV=2	DNA binding;metal ion binding;protein binding	0	0	0	0	0	0	0	0	0	1	1	1	0
P13645	Keratin, type I cytoskeletal 10 OS=Homo sapiens GN=KRT10 PE=1 SV=6	structural molecule activity	0	1	0	0	0	0	0	0	0	0	0	0	0
P04264	Keratin, type II cytoskeletal 1 OS=Homo sapiens GN=KRT1 PE=1 SV=6	catalytic activity;motor activity;protein binding;receptor activity;structural molecule activity;transporter activity	1	1	0	1	1	0	1	0	0	0	0	1	0
P22079	Lactoperoxidase OS=Homo sapiens GN=LPO PE=1 SV=2	antioxidant activity;catalytic activity;metal ion binding	1	0	1	0	0	0	0	0	0	0	1	0	0
Q2I6W4	Catalase OS=Callithrix jacchus GN=CAT PE=2 SV=3	antioxidant activity;catalytic activity;metal ion binding	1	0	1	0	0	0	0	0	0	0	1	0	0
P06733	Alpha-enolase OS=Homo sapiens GN=ENO1 PE=1 SV=2	catalytic activity;DNA binding;metal ion binding;protein binding;RNA binding	1	0	0	0	0	0	0	0	1	1	1	1	0
Q5R7D3	Heat shock 70 kDa protein 1 OS=Pongo abelii GN=HSPA1 PE=2 SV=1	nucleotide binding	0	0	0	0	0	0	0	0	0	0	0	0	1
P02538	Keratin, type II cytoskeletal 6A OS=Homo sapiens GN=KRT6A PE=1 SV=3	catalytic activity;motor activity;protein binding;structural molecule activity	1	1	0	1	0	0	0	0	0	0	0	1	0
Q5R1W6	Transketolase OS=Pan troglodytes GN=TKT PE=2 SV=1	metabolic process	0	0	0	0	0	0	0	1	0	0	0	0	0
P35908	Keratin, type II cytoskeletal 2 epidermal OS=Homo sapiens GN=KRT2 PE=1 SV=2	protein binding;structural molecule activity	0	1	0	0	0	0	0	0	0	0	0	1	0
P02788	Lactotransferrin OS=Homo sapiens GN=LTF PE=1 SV=6	catalytic activity;DNA binding;enzyme regulator activity;metal ion binding;protein binding	1	0	0	0	0	0	0	0	0	1	1	1	0
Q02818	Nucleobindin-1 OS=Homo sapiens GN=NUCB1 PE=1 SV=4	DNA binding;metal ion binding;protein binding	0	0	0	0	0	0	0	0	0	1	1	1	0
P13796	Plastin-2 OS=Homo sapiens GN=LCP1 PE=1 SV=6	metal ion binding;protein binding	0	0	0	0	0	0	0	0	0	0	1	1	0
A5A6I6	Serotransferrin OS=Pan troglodytes GN=TF PE=2 SV=1	metal ion binding;transporter activity	0	0	0	0	1	0	0	0	0	0	1	0	0
Q96HE7	ERO1-like protein alpha OS=Homo sapiens GN=ERO1A PE=1 SV=2	catalytic activity;nucleotide binding;protein binding	1	0	0	0	0	0	0	0	0	0	0	1	1
P13646	Keratin, type I cytoskeletal 13 OS=Homo sapiens GN=KRT13 PE=1 SV=4	structural molecule activity	0	1	0	0	0	0	0	0	0	0	0	0	0
P06744	Glucose-6-phosphate isomerase OS=Homo sapiens GN=GPI PE=1 SV=4	catalytic activity;protein binding	1	0	0	0	0	0	0	0	0	0	0	1	0
P14314	Glucosidase 2 subunit beta OS=Homo sapiens GN=PRKCSH PE=1 SV=2	metal ion binding;protein binding;RNA binding	0	0	0	0	0	0	0	0	1	0	1	1	0
P02533	Keratin, type I cytoskeletal 14 OS=Homo sapiens GN=KRT14 PE=1 SV=4	protein binding;structural molecule activity	0	1	0	0	0	0	0	0	0	0	0	1	0
P30838	Aldehyde dehydrogenase, dimeric NADP-preferring OS=Homo sapiens GN=ALDH3A1 PE=1 SV=3	catalytic activity;protein binding	1	0	0	0	0	0	0	0	0	0	0	1	0
Q6ZN66	Guanylate-binding protein 6 OS=Homo sapiens GN=GBP6 PE=2 SV=1	catalytic activity;nucleotide binding	1	0	0	0	0	0	0	0	0	0	0	0	1
P07602	Prosaposin OS=Homo sapiens GN=PSAP PE=1 SV=2	enzyme regulator activity;protein binding	0	0	0	0	0	1	0	0	0	0	0	1	0
P15144	Aminopeptidase N OS=Homo sapiens GN=ANPEP PE=1 SV=4	catalytic activity;metal ion binding;receptor activity	1	0	0	0	0	0	1	0	0	0	1	0	0
P01024	Complement C3 OS=Homo sapiens GN=C3 PE=1 SV=2	enzyme regulator activity;protein binding	0	0	0	0	0	1	0	0	0	0	0	1	0
Q13217	DnaJ homolog subfamily C member 3 OS=Homo sapiens GN=DNAJC3 PE=1 SV=1	enzyme regulator activity;protein binding	0	0	0	0	0	1	0	0	0	0	0	1	0
P06396	Gelsolin OS=Homo sapiens GN=GSN PE=1 SV=1	metal ion binding;protein binding	0	0	0	0	0	0	0	0	0	0	1	1	0
P19013	Keratin, type II cytoskeletal 4 OS=Homo sapiens GN=KRT4 PE=1 SV=4	protein binding;structural molecule activity	1	0	0	0	0	0	0	0	0	0	0	1	0
O75083	WD repeat-containing protein 1 OS=Homo sapiens GN=WDR1 PE=1 SV=4	protein binding	0	0	0	0	0	0	0	0	0	0	0	1	0
P31939	Bifunctional purine biosynthesis protein PURH OS=Homo sapiens GN=ATIC PE=1 SV=3	catalytic activity;protein binding	1	0	0	0	0	0	0	0	0	0	0	1	0
P15311	Ezrin OS=Homo sapiens GN=EZR PE=1 SV=4	protein binding;RNA binding	0	0	0	0	0	0	0	0	1	0	0	1	0
P04196	Histidine-rich glycoprotein OS=Homo sapiens GN=HRG PE=1 SV=1	enzyme regulator activity;metal ion binding;protein binding	0	0	0	0	0	1	0	0	0	0	1	1	0
P49257	Protein ERGIC-53 OS=Homo sapiens GN=LMAN1 PE=1 SV=2	metal ion binding;protein binding	0	0	0	0	0	0	0	0	0	0	1	1	0
H2N4I1	Sulfhydryl oxidase 1 OS=Pongo abelii GN=QSOX1 PE=3 SV=2	catalytic activity	1	0	0	0	0	0	0	0	0	0	0	0	0
P01008	Antithrombin-III OS=Homo sapiens GN=SERPINC1 PE=1 SV=1	enzyme regulator activity;protein binding	0	0	0	0	0	1	0	0	0	0	0	1	0
P43251	Biotinidase OS=Homo sapiens GN=BTD PE=1 SV=2	catalytic activity	1	0	0	0	0	0	0	0	0	0	0	0	0
P10909	Clusterin OS=Homo sapiens GN=CLU PE=1 SV=1	catalytic activity;protein binding	1	0	0	0	0	0	0	0	0	0	0	1	0
P0C0L4	Complement C4-A OS=Homo sapiens GN=C4A PE=1 SV=2	enzyme regulator activity;protein binding	0	0	0	0	0	1	0	0	0	0	0	1	0
P01871	Ig mu chain C region OS=Homo sapiens GN=IGHM PE=1 SV=3	DNA binding;protein binding	0	0	0	0	0	0	0	0	0	1	0	1	0
Q6IE36	Ovostatin homolog 2 OS=Homo sapiens GN=OVOS2 PE=2 SV=2	enzyme regulator activity	0	0	0	0	0	1	0	0	0	0	0	0	0
Q9UBG3	Cornulin OS=Homo sapiens GN=CRNN PE=1 SV=1	metal ion binding	0	0	0	0	0	0	0	0	0	0	1	0	0
P14923	Junction plakoglobin OS=Homo sapiens GN=JUP PE=1 SV=3	protein binding;signal transducer activity;structural molecule activity	0	1	0	0	0	0	0	0	0	0	0	1	0
Q4R4T8	Legumain OS=Macaca fascicularis GN=LGMN PE=2 SV=1	catalytic activity	1	0	0	0	0	0	0	0	0	0	0	0	0
G7MVY8	Furin OS=Macaca mulatta GN=FURIN PE=2 SV=1	catalytic activity;enzyme regulator activity;protein binding	1	0	0	0	0	1	0	0	0	0	0	1	0
F7HCH2	Serum albumin OS=Macaca mulatta GN=ALB PE=4 SV=1	DNA binding;protein binding	0	0	0	0	0	0	0	0	0	1	0	1	0
F6RLH5	Heat shock cognate 71 kDa protein isoform 1 OS=Macaca mulatta GN=HSPA8 PE=2 SV=1	catalytic activity;nucleotide binding;protein binding	1	0	0	0	0	0	0	0	0	0	0	1	1
F7BHR1	Transketolase OS=Macaca mulatta GN=TKT PE=3 SV=1	catalytic activity;metal ion binding;protein binding	1	0	0	0	0	0	0	0	0	0	0	1	1
F7F0E8	Pyruvate kinase OS=Macaca mulatta GN=PKM PE=3 SV=1	catalytic activity;metal ion binding	1	0	0	0	0	0	0	0	0	0	1	0	0
F6VD19	DnaJ homolog subfamily C member 3 OS=Macaca mulatta GN=DNAJC3 PE=2 SV=1	catalytic activity;protein binding	1	0	0	0	0	0	0	0	0	0	0	1	0
F6RRV0	Serine/threonine-protein phosphatase 2A 65 kDa regulatory subunit A alpha isoform OS=Macaca mulatta GN=PPP2R1A PE=2 SV=1	catalytic activity;enzyme regulator activity;protein binding	1	0	0	0	0	1	0	0	0	0	0	1	0
F7GYM9	Plastin-3 isoform 1 OS=Macaca mulatta GN=PLS3 PE=2 SV=1	metal ion binding;protein binding	0	0	0	0	0	0	0	0	0	0	1	1	0
F7FMQ2	CRP55 OS=Macaca mulatta GN=CALR PE=2 SV=1	metal ion binding;protein binding;RNA binding	0	0	0	0	0	0	0	0	1	0	1	1	0
F7H193	Leukotriene A(4) hydrolase OS=Macaca mulatta GN=LTA4H PE=3 SV=1	catalytic activity;metal ion binding	1	0	0	0	0	0	0	0	0	0	1	0	0
F7HHU1	Sulfhydryl oxidase OS=Macaca mulatta GN=QSOX1 PE=4 SV=1	catalytic activity	1	0	0	0	0	0	0	0	0	0	0	0	0
F7EZT6	Endoplasmin OS=Macaca mulatta GN=HSP90B1 PE=2 SV=1	nucleotide binding;protein binding;RNA binding	0	0	0	0	0	0	0	0	1	0	0	1	1
F7C1B5	Aldehyde dehydrogenase OS=Macaca mulatta GN=ALDH3A2 PE=3 SV=1	catalytic activity	1	0	0	0	0	0	0	0	0	0	0	0	0
F7H7V0	Desmoplakin-3 OS=Macaca mulatta GN=JUP PE=2 SV=1	protein binding;signal transducer activity;structural molecule activity	0	1	0	0	0	0	0	0	0	0	0	1	0
F6W5A7	Matrix metalloproteinase-9 OS=Macaca mulatta GN=MMP9 PE=2 SV=1	catalytic activity;metal ion binding;protein binding	1	0	0	0	0	0	0	0	0	0	1	1	0
F7BCV3	Endoplasmic reticulum lectin 1 isoform 1 OS=Macaca mulatta GN=ERLEC1 PE=2 SV=1	protein binding	0	0	0	0	0	0	0	0	0	0	0	1	0
P13647	Keratin, type II cytoskeletal 5 OS=Homo sapiens GN=KRT5 PE=1 SV=3	catalytic activity;motor activity;protein binding;structural molecule activity	1	1	0	1	0	0	0	0	0	0	0	1	0
Q9H173	Nucleotide exchange factor SIL1 OS=Homo sapiens GN=SIL1 PE=1 SV=1	enzyme regulator activity;nucleotide binding;protein binding	0	0	0	0	0	1	0	0	0	0	0	1	1
P30740	Leukocyte elastase inhibitor OS=Homo sapiens GN=SERPINB1 PE=1 SV=1	enzyme regulator activity	0	0	0	0	0	1	0	0	0	0	0	0	0
B1MTB7	Serpin B5 OS=Callicebus moloch GN=SERPINB5 PE=3 SV=1	enzyme regulator activity	0	0	0	0	0	1	0	0	0	0	0	0	0
P50417	Haptoglobin OS=Ateles geoffroyi GN=HP PE=2 SV=1	antioxidant activity;catalytic activity;protein binding	1	0	1	0	0	0	0	0	0	0	0	1	0
O43813	LanC-like protein 1 OS=Homo sapiens GN=LANCL1 PE=1 SV=1	catalytic activity;metal ion binding;protein binding;receptor activity;signal transducer activity	1	0	0	0	0	0	1	0	0	0	1	1	0
A5A6I5	Fructose-bisphosphate aldolase A OS=Pan troglodytes GN=ALDOA PE=2 SV=1	catalytic activity	1	0	0	0	0	0	0	0	0	0	0	0	0
Q92820	Gamma-glutamyl hydrolase OS=Homo sapiens GN=GGH PE=1 SV=2	catalytic activity	1	0	0	0	0	0	0	0	0	0	0	0	0
P40394	Alcohol dehydrogenase class 4 mu/sigma chain OS=Homo sapiens GN=ADH7 PE=1 SV=2	catalytic activity;metal ion binding;protein binding	1	0	0	0	0	0	0	0	0	0	1	1	0
P23280	Carbonic anhydrase 6 OS=Homo sapiens GN=CA6 PE=1 SV=3	catalytic activity;metal ion binding	1	0	0	0	0	0	0	0	0	0	1	0	0
P07858	Cathepsin B OS=Homo sapiens GN=CTSB PE=1 SV=3	catalytic activity;protein binding	1	0	0	0	0	0	0	0	0	0	0	1	0
P23280	Carbonic anhydrase 6 OS=Homo sapiens GN=CA6 PE=1 SV=3	catalytic activity;metal ion binding	1	0	0	0	0	0	0	0	0	0	1	0	0
P40926	Malate dehydrogenase, mitochondrial OS=Homo sapiens GN=MDH2 PE=1 SV=3	catalytic activity;nucleotide binding;protein binding;RNA binding	1	0	0	0	0	0	0	0	1	0	0	1	1
P06753	Tropomyosin alpha-3 chain OS=Homo sapiens GN=TPM3 PE=1 SV=2	protein binding	0	0	0	0	0	0	0	0	0	0	0	1	0
P10909	Clusterin OS=Homo sapiens GN=CLU PE=1 SV=1	catalytic activity;protein binding	1	0	0	0	0	0	0	0	0	0	0	1	0
P07951	Tropomyosin beta chain OS=Homo sapiens GN=TPM2 PE=1 SV=1	protein binding;structural molecule activity	0	1	0	0	0	0	0	0	0	0	0	1	0
P24855	Deoxyribonuclease-1 OS=Homo sapiens GN=DNASE1 PE=1 SV=1	catalytic activity;protein binding	1	0	0	0	0	0	0	0	0	0	0	1	0
Q92820	Gamma-glutamyl hydrolase OS=Homo sapiens GN=GGH PE=1 SV=2	catalytic activity	1	0	0	0	0	0	0	0	0	0	0	0	0
P07996	Thrombospondin-1 OS=Homo sapiens GN=THBS1 PE=1 SV=2	metal ion binding;protein binding	0	0	0	0	0	0	0	0	0	0	1	1	0
O60218	Aldo-keto reductase family 1 member B10 OS=Homo sapiens GN=AKR1B10 PE=1 SV=2	catalytic activity;protein binding	1	0	0	0	0	0	0	0	0	0	0	1	0
Q5T2L2	Putative aldo-keto reductase family 1 member C8 OS=Homo sapiens GN=AKR1C8P PE=5 SV=2	catalytic activity	1	0	0	0	0	0	0	0	0	0	0	0	0
O00584	Ribonuclease T2 OS=Homo sapiens GN=RNASET2 PE=1 SV=2	catalytic activity;RNA binding	1	0	0	0	0	0	0	0	1	0	0	0	0
A2V9Z4	Serum albumin OS=Macaca fascicularis GN=ALB PE=2 SV=1	metal ion binding	0	0	0	0	0	0	0	0	0	0	1	0	0
A5A6N7	L-lactate dehydrogenase B chain OS=Pan troglodytes GN=LDHB PE=2 SV=1	catalytic activity	1	0	0	0	0	0	0	0	0	0	0	0	0
P04264	Keratin, type II cytoskeletal 1 OS=Homo sapiens GN=KRT1 PE=1 SV=6	catalytic activity;motor activity;protein binding;receptor activity;structural molecule activity;transporter activity	1	1	0	1	1	0	1	0	0	0	0	1	0
P35908	Keratin, type II cytoskeletal 2 epidermal OS=Homo sapiens GN=KRT2 PE=1 SV=2	protein binding;structural molecule activity	0	1	0	0	0	0	0	0	0	0	0	1	0
P02533	Keratin, type I cytoskeletal 14 OS=Homo sapiens GN=KRT14 PE=1 SV=4	protein binding;structural molecule activity	0	1	0	0	0	0	0	0	0	0	0	1	0
Q6DTV9	Peptidyl-prolyl cis-trans isomerase A OS=Aotus trivirgatus GN=PPIA PE=2 SV=3	catalytic activity	1	0	0	0	0	0	0	0	0	0	0	0	0
P02538	Keratin, type II cytoskeletal 6A OS=Homo sapiens GN=KRT6A PE=1 SV=3	catalytic activity;motor activity;protein binding;structural molecule activity	1	1	0	1	0	0	0	0	0	0	0	1	0
P23284	Peptidyl-prolyl cis-trans isomerase B OS=Homo sapiens GN=PPIB PE=1 SV=2	catalytic activity;protein binding;RNA binding	1	0	0	0	0	0	0	0	1	0	0	1	0
P28325	Cystatin-D OS=Homo sapiens GN=CST5 PE=1 SV=1	enzyme regulator activity;protein binding	0	0	0	0	0	1	0	0	0	0	0	1	0
Q16769	Glutaminyl-peptide cyclotransferase OS=Homo sapiens GN=QPCT PE=1 SV=1	catalytic activity;metal ion binding	1	0	0	0	0	0	0	0	0	0	1	0	0
Q9NQX5	Neural proliferation differentiation and control protein 1 OS=Homo sapiens GN=NPDC1 PE=1 SV=2	protein binding	0	0	0	0	0	0	0	0	0	0	0	1	0
Q5JXB2	Putative ubiquitin-conjugating enzyme E2 N-like OS=Homo sapiens GN=UBE2NL PE=1 SV=1	catalytic activity	1	0	0	0	0	0	0	0	0	0	0	0	0
Q96DA0	Zymogen granule protein 16 homolog B OS=Homo sapiens GN=ZG16B PE=1 SV=3		0	0	0	0	0	0	0	0	0	0	0	0	0
Q7RTS7	Keratin, type II cytoskeletal 74 OS=Homo sapiens GN=KRT74 PE=1 SV=2	protein binding;structural molecule activity	0	1	0	0	0	0	0	0	0	0	0	1	0
P04406	Glyceraldehyde-3-phosphate dehydrogenase OS=Homo sapiens GN=GAPDH PE=1 SV=3	catalytic activity;nucleotide binding;protein binding	1	0	0	0	0	0	0	0	0	0	0	1	1
F7B786	Cytokeratin-1 OS=Macaca mulatta GN=KRT1 PE=3 SV=1	catalytic activity;motor activity;structural molecule activity	1	1	0	1	0	0	0	0	0	0	0	0	0
F7H312	Uncharacterized protein OS=Macaca mulatta GN=KRT16 PE=3 SV=1	structural molecule activity	0	1	0	0	0	0	0	0	0	0	0	0	0
F7E526	Uncharacterized protein OS=Macaca mulatta GN=LOC722990 PE=3 SV=1	structural molecule activity	0	1	0	0	0	0	0	0	0	0	0	0	0
F7GTQ0	Uncharacterized protein OS=Macaca mulatta GN=QPCT PE=4 SV=1	catalytic activity;metal ion binding	1	0	0	0	0	0	0	0	0	0	1	0	0
F7DPX1	Uncharacterized protein OS=Macaca mulatta GN=NPDC1 PE=4 SV=1		0	0	0	0	0	0	0	0	0	0	0	0	0
G7PUB9	Nucleoside diphosphate kinase OS=Macaca fascicularis GN=EGM_07722 PE=3 SV=1	catalytic activity;nucleotide binding	1	0	0	0	0	0	0	0	0	0	0	0	1
G7PRG1	Putative uncharacterized protein OS=Macaca fascicularis GN=EGM_06639 PE=3 SV=1	transporter activity	0	0	0	0	1	0	0	0	0	0	0	0	0
P81605	Dermcidin OS=Homo sapiens GN=DCD PE=1 SV=2	catalytic activity;protein binding;RNA binding	1	0	0	0	0	0	0	0	1	0	0	1	0
P07737	Profilin-1 OS=Homo sapiens GN=PFN1 PE=1 SV=2	enzyme regulator activity;nucleotide binding;protein binding;RNA binding	0	0	0	0	0	1	0	0	1	0	0	1	1
P29373	Cellular retinoic acid-binding protein 2 OS=Homo sapiens GN=CRABP2 PE=1 SV=2	protein binding;transporter activity	0	0	0	0	1	0	0	0	0	0	0	1	0
Q01469	Fatty acid-binding protein, epidermal OS=Homo sapiens GN=FABP5 PE=1 SV=3	protein binding;transporter activity	0	0	0	0	1	0	0	0	0	0	0	1	0
Q8I030	Cystatin-B OS=Pan troglodytes GN=CSTB PE=3 SV=1	enzyme regulator activity;protein binding	0	0	0	0	0	1	0	0	0	0	0	1	0
O19093	Cystatin-C OS=Saimiri sciureus GN=CST3 PE=2 SV=1	enzyme regulator activity	0	0	0	0	0	1	0	0	0	0	0	0	0
Q14697	Neutral alpha-glucosidase AB OS=Homo sapiens GN=GANAB PE=1 SV=3	catalytic activity;RNA binding	1	0	0	0	0	0	0	0	1	0	0	0	0
P01040	Cystatin-A OS=Homo sapiens GN=CSTA PE=1 SV=1	enzyme regulator activity;protein binding;structural molecule activity	0	1	0	0	0	1	0	0	0	0	0	1	0
P27482	Calmodulin-like protein 3 OS=Homo sapiens GN=CALML3 PE=1 SV=2	metal ion binding;protein binding	0	0	0	0	0	0	0	0	0	0	1	1	0
Q1KLX0	Cathelicidin antimicrobial peptide OS=Saguinus oedipus GN=CAMP PE=3 SV=1		0	0	0	0	0	0	0	0	0	0	0	0	0
Q5R9M3	Thioredoxin OS=Pongo abelii GN=TXN PE=3 SV=3	catalytic activity	0	0	0	0	0	0	0	0	0	0	0	0	0
P47929	Galectin-7 OS=Homo sapiens GN=LGALS7 PE=1 SV=2		1	0	0	0	0	0	0	0	0	0	0	0	0
P61561	Syncytin-1 OS=Gorilla gorilla gorilla GN=ERVW-1 PE=3 SV=1		0	0	0	0	0	0	0	0	0	0	0	0	0
P06768	Retinol-binding protein 2 OS=Rattus norvegicus GN=Rbp2 PE=1 SV=3	transporter activity	0	0	0	0	1	0	0	0	0	0	0	0	0
O77523	Beta-2-microglobulin OS=Alouatta seniculus GN=B2M PE=3 SV=1	protein binding	0	0	0	0	0	0	0	0	0	0	0	1	0
P25445	Tumor necrosis factor receptor superfamily member 6 OS=Homo sapiens GN=FAS PE=1 SV=1	protein binding;receptor activity;signal transducer activity	0	0	0	0	0	0	1	1	0	0	0	1	0
Confidence	Sequence
High	LGIWTLLPLVLTSVAR
Checked	Confidence	m/z [Da]	Ion Inject Time [ms]	RT [min]	First Scan	Spectrum File	Ions Matched	Ions Score	Identity Strict	Identity Relaxed	Expectation Value	XCorr
TRUE	High	876.542	35	126.702	20774	AI8_Primates_2.raw	5/120	24.8	22	22	0.0528154
Confidence	Sequence
High	HQVLSMYLWLSHHFEEDHFPHVQKAEEMSINIADLLAK
Checked	Confidence	m/z [Da]	Ion Inject Time [ms]	RT [min]	First Scan	Spectrum File	Ions Matched	Ions Score	Identity Strict	Identity Relaxed	Expectation Value	XCorr
TRUE	High	760.714	35	111.488	18146	AI8_Primates_2.raw	0/0					2.2835
G7PUP9	Cytokeratin-10 (Fragment) OS=Macaca fascicularis GN=EGM_07881 PE=3 SV=1	structural molecule activity	0	1	0	0	0	0	0	0	0	0	1	0	0
Confidence	Sequence
High	QSLEASLAETEGR
Checked	Confidence	Search Engine Rank	Ion Inject Time [ms]	RT [min]	First Scan	Spectrum File	Ions Matched	Ions Score	Identity Strict	Identity Relaxed	Expectation Value	XCorr
TRUE	High	1	35	55.7954	9487	AI8_Primates_2.raw	7/144	36.25	30	30	0.00349778
TRUE	High	1	35	55.7954	9487	AI8_Primates_2.raw	0/0					2.19806
High	YENEVALR
Checked	Confidence	Search Engine Rank	Ion Inject Time [ms]	RT [min]	First Scan	Spectrum File	Ions Matched	Ions Score	Identity Strict	Identity Relaxed	Expectation Value	XCorr
TRUE	High	1	40.86	43.6256	7018	AI8_Primates_2.raw	7/76	32.26	30	30	0.00855781
G7PQY2	Putative uncharacterized protein OS=Macaca fascicularis GN=EGM_05959 PE=3 SV=1	metal ion binding;transporter activity	0	0	0	0	1	0	0	0	0	0	1	0	0
G7PUP9	Cytokeratin-10 (Fragment) OS=Macaca fascicularis GN=EGM_07881 PE=3 SV=1	structural molecule activity	0	1	0	0	0	0	0	0	0	0	0	0	0
G7PID3	Cytokeratin-2e OS=Macaca fascicularis GN=EGM_03270 PE=3 SV=1	structural molecule activity	0	1	0	0	0	0	0	0	0	0	0	0	0
G7PUS5	Putative uncharacterized protein OS=Macaca fascicularis GN=EGM_07909 PE=3 SV=1	structural molecule activity	0	1	0	0	0	0	0	0	0	0	0	0	0
G7PQY3	Hemoglobin beta chain OS=Macaca fascicularis GN=EGM_05960 PE=3 SV=1	metal ion binding;transporter activity	0		0	0	1	0	0	0	0	0	1	0	0
G7PIC8	Cytokeratin-6C OS=Macaca fascicularis GN=EGM_03263 PE=3 SV=1	structural molecule activity	0	1	0	0	0	0	0	0	0	0	0	0	0
G7PID4	Cytokeratin-1B OS=Macaca fascicularis GN=EGM_03272 PE=3 SV=1	structural molecule activity	0	1	0	0	0	0	0	0	0	0	0	0	0
G7P2N0	Histone H4 OS=Macaca fascicularis GN=EGM_03027 PE=3 SV=1	DNA binding;protein binding	0	0	0	0	0	0	0	0	0	1	0	0	0
G7PHX5	Putative uncharacterized protein OS=Macaca fascicularis GN=EGM_03325 PE=4 SV=1	catalytic activity	1	0	0	0	0	0	0	0	0	0	0	0	0
G8F2G9	Putative uncharacterized protein OS=Macaca fascicularis GN=EGM_20828 PE=3 SV=1	protein binding	0	0	0	0	0	0	0	0	0	0	0	1	0
G7P5L7	Putative uncharacterized protein OS=Macaca fascicularis GN=EGM_14426 PE=4 SV=1		0	0	0	0	0	0	0	0	0	0	0	0	0
G7NY31	Putative uncharacterized protein OS=Macaca fascicularis GN=EGM_10710 PE=3 SV=1	metal ion binding	0	0	0	0	0	0	0	0	0	0	1	0	0
G7NUG4	Protein S100 OS=Macaca fascicularis GN=EGM_01110 PE=3 SV=1	metal ion binding	0	0	0	0	0	0	0	0	0	0	1	0	0
G7P7Z2	Thioltransferase-1 OS=Macaca fascicularis GN=EGM_15245 PE=4 SV=1	catalytic activity	1	0	0	0	0	0	0	0	0	0	0	0	0
G7PT41	Putative uncharacterized protein OS=Macaca fascicularis GN=EGM_08265 PE=3 SV=1	nucleotide binding	0	0	0	0	0	0	0	0	0	0	0	0	1
G7P2N4	Histone H1c OS=Macaca fascicularis GN=EGM_13318 PE=3 SV=1	DNA binding	0	0	0	0	0	0	0	0	0	1	0	0	0
G7PGL4	Putative uncharacterized protein OS=Macaca fascicularis GN=EGM_02177 PE=4 SV=1		0	0	0	0	0	0	0	0	0	0	0	0	0
G7PUF6	Putative uncharacterized protein OS=Macaca fascicularis GN=EGM_07763 PE=4 SV=1	antioxidant activity;catalytic activity	1	0	1	0	0	0	0	0	0	0	0	0	0
G7PTX9	Transcription elongation factor SPT6 OS=Macaca fascicularis GN=EGM_07555 PE=4 SV=1	catalytic activity;DNA binding;protein binding;RNA binding	1	0	0	0	0	0	0	0	1	1	0	1	0
G7PWZ9	Polyubiquitin-C OS=Macaca fascicularis GN=EGM_09461 PE=4 SV=1	protein binding;structural molecule activity	0	1	0	0	0	0	0	0	0	0	0	1	0
G7NZC8	Elongation factor 1-alpha OS=Macaca fascicularis GN=EGM_10569 PE=3 SV=1	catalytic activity;nucleotide binding;RNA binding	1	0	0	0	0	0	0	0	1	0	0	0	1
P35908	Keratin, type II cytoskeletal 2 epidermal OS=Homo sapiens GN=KRT2 PE=1 SV=2	protein binding;structural molecule activity	0	1	0	0	0	0	0	0	0	0	0	1	0
P05109	Protein S100-A8 OS=Homo sapiens GN=S100A8 PE=1 SV=1	metal ion binding;protein binding	0	0	0	0	0	0	0	0	0	0	1	1	0
P04259	Keratin, type II cytoskeletal 6B OS=Homo sapiens GN=KRT6B PE=1 SV=5	catalytic activity;motor activity;protein binding;structural molecule activity	1	1	0	1	0	0	0	0	0	0	0	1	0
P81605	Dermcidin OS=Homo sapiens GN=DCD PE=1 SV=2	catalytic activity;protein binding;RNA binding	0	1	0	0	0	0	0	0	1	0	0	1	0
Q95M66	Beta-defensin 1 OS=Saguinus oedipus GN=DEFB1 PE=3 SV=1		0	0	0	0	0	0	0	0	0	0	0	0	0
A0SXL6	Elongation factor 2 OS=Callithrix jacchus GN=EEF2 PE=2 SV=1	catalytic activity;nucleotide binding;RNA binding	1	0	0	0	0	0	0	0	1	0	0	0	1
P06703	Protein S100-A6 OS=Homo sapiens GN=S100A6 PE=1 SV=1	metal ion binding;protein binding;transporter activity	0	0	0	0	1	0	0	0	0	0	1	1	0
P35754	Glutaredoxin-1 OS=Homo sapiens GN=GLRX PE=1 SV=2	catalytic activity;protein binding	1	0	0	0	0	0	0	0	0	0	0	1	0
P54652	Heat shock-related 70 kDa protein 2 OS=Homo sapiens GN=HSPA2 PE=1 SV=1	nucleotide binding;protein binding	1	0	0	0	0	0	0	0	0	0	0	1	1
F6TDW8	Histone H2A (Fragment) OS=Macaca mulatta GN=LOC705636 PE=3 SV=1	DNA binding;protein binding	0	0	0	0	0	0	0	0	0	1	0	1	0
F7H2F8	Collectin subfamily member 11		0	0	0	0	0	0	0	0	0	0	0	0	0
Confidence	Sequence	Confidence Sequest HT			0	0	0	0	0	0	0	0	0	0
High	GISMAVDAVVTNLK	High			0	0	0	0	0	0	0	0	0	0
Checked	Confidence	m/z [Da]	Ion Inject Time [ms]	RT [min]	0	0	0	0	0	0	0	0	0	0
TRUE	High	717.388	244	43.0823	0	0	0	0	0	0	0	0	0	0
TRUE	High	717.388	244	43.0823	0	0	0	0	0	0	0	0	0	0
Confidence	Sequence	Confidence Sequest HT			0	0	0	0	0	0	0	0	0	0
High	TAGTLTIIDTGIGMTK	Medium			0	0	0	0	0	0	0	0	0	0
Checked	Confidence	m/z [Da]	Ion Inject Time [ms]	RT [min]	0	0	0	0	0	0	0	0	0	0
TRUE	High	804.931	244	38.5714	0	0	0	0	0	0	0	0	0	0
F6QAX2	Tubulin beta chain	catalytic activity;nucleotide binding;structural molecule activity	1	1	0	0	0	0	0	0	0	0	0	0	1
Confidence	Sequence	Confidence Sequest HT			0	0	0	0	0	0	0	0	0
High	SVGLELTLDDFQK	Medium			0	0	0	0	0	0	0	0	0
Checked	Confidence	m/z [Da]	Ion Inject Time [ms]	RT [min]	0	0	0	0	0	0	0	0	0	Percolator PEP
TRUE	High	732.883	244	43.7124	0	0	0	0	0	0	0	0	0	0.106
Confidence	Sequence	Confidence Sequest HT			0	0	0	0	0	0	0	0	0
High	DGVILLWDLAEGK	Medium			0	0	0	0	0	0	0	0	0
Checked	Confidence	m/z [Da]	Ion Inject Time [ms]	RT [min]	0	0	0	0	0	0	0	0	0	Percolator PEP
TRUE	High	714.89	244	74.3602	0	0	0	0	0	0	0	0	0	0.1331
Q6S8J3	POTE ankyrin domain family member E OS=Homo sapiens GN=POTEE PE=1 SV=3	protein binding	0	0	0	0	0	0	0	0	0	0	0	1	0
Confidence	Sequence	Confidence Sequest HT
High	MANYYEVLGVQASASPEDIKKAYR
Checked	Confidence	m/z [Da]	Ion Inject Time [ms]	RT [min]	First Scan	Spectrum File	Ions Matched	Ions Score	Identity Strict	Identity Relaxed	Expectation Value	XCorr	Percolator q-Value	Percolator PEP
TRUE	High	1361.16	244	73.1605	11651	10,11,12en20ul.raw	9/268	16.3	47	40	12.0505		0	0.1197
G7PJP0	Gamma-enolase OS=Macaca fascicularis GN=EGM_02922 PE=3 SV=1	catalytic activity;metal ion binding	1	0	0	0	0	0	0	0	0	0	1	0	0
Confidence	Sequence	Confidence Sequest HT		0	0	0	0	0	0	0	0	0
High	AAVPSGASTGIYEALELR	High		0	0	0	0	0	0	0	0	0
Checked	Confidence	m/z [Da]	Ion Inject Time [ms]	0	0	0	0	0	0	0	0	0	Percolator q-Value	Percolator PEP
TRUE	High	902.977	244	0	0	0	0	0	0	0	0	0	0	0.00834781
TRUE	High	902.977	244	0	0	0	0	0	0	0	0	0	0	0.000806091
F6RSN8	Uncharacterized protein OS=Macaca mulatta GN=SDHA PE=4 SV=1	catalytic activity	1	0	0	0	0	0	0	0	0	0	0	0	0
Confidence	Sequence	Confidence Sequest HT		0	0	0	0	0	0	0	0	0
High	LGANSLLDLVVFGR	Low		0	0	0	0	0	0	0	0	0
Checked	Confidence	m/z [Da]	Ion Inject Time [ms]	0	0	0	0	0	0	0	0	0	Percolator q-Value	Percolator PEP
TRUE	High	737.917	244	0	0	0	0	0	0	0	0	0	0	0.2216
TRUE	High	737.918	244	0	0	0	0	0	0	0	0	0	0	0.4345
F7C3R1	78 kDa glucose-regulated protein OS=Macaca mulatta GN=HSPA5 PE=2 SV=1	catalytic activity;nucleotide binding;protein binding	1	0	0	0	0	0	0	0	0	0	0	1	1
Confidence	Sequence	Confidence Sequest HT
High	FEELNMDLFR	High
Checked	Confidence	m/z [Da]	Ion Inject Time [ms]	RT [min]	First Scan	Spectrum File	Ions Matched	Ions Score	Identity Strict	Identity Relaxed	Expectation Value	XCorr	Percolator q-Value	Percolator PEP
TRUE	High	665.311	244	39.9525	5863	10,11,12en20ul.raw	0/0					2.83221	0	0.2491
TRUE	High	665.311	244	39.9525	5863	10,11,12en20ul.raw	6/92	45.01	33	26	0.000774554		0	0.1996
Confidence	Sequence	Confidence Sequest HT
High	ISEQFTAMFR	High
Checked	Confidence	m/z [Da]	Ion Inject Time [ms]	RT [min]	First Scan	Spectrum File	Ions Matched	Ions Score	Identity Strict	Identity Relaxed	Expectation Value	XCorr	Percolator q-Value	Percolator PEP
TRUE	High	615.305	244	40.8527	6043	10,11,12en20ul.raw	0/0					2.75471	0	0.2081
TRUE	High	615.305	244	40.8527	6043	10,11,12en20ul.raw	6/96	40.14	35	28	0.00325825		0	0.2396
F6TII3	Actin gamma 1	nucleotide binding;protein binding;structural molecule activity	0	1	0	0	0	0	0	0	0	0	0	1	1

## Sheet: molecular 
Accession	Description	Molecular Function		catalytic activity	structural molecule activity	antioxidant activity	motor activity	transporter activity	enzime regulator activity	receptor activity	metabolic process	RNA binding	DNA binding	metal ion binding	protein binding	nucleotide binding				% proteínas con esta función			%
P11021	78 kDa glucose-regulated protein OS=Homo sapiens GN=HSPA5 PE=1 SV=2	catalytic activity;metal ion binding;nucleotide binding;protein binding	1	1	0	0	0	0	0	0	0	0	0	1	1	1	1	catalytic activity	66	22.2222		Catalytic activity	22.2222						Cell communication	1.96078
P35527	Keratin, type I cytoskeletal 9 OS=Homo sapiens GN=KRT9 PE=1 SV=3	structural molecule activity	2	0	1	0	0	0	0	0	0	0	0	0	0	0	2	structural molecule activity	28	9.42761		Structural molecule activity	9.42761						Cell organization and biogenesis	12.0448
P80303	Nucleobindin-2 OS=Homo sapiens GN=NUCB2 PE=1 SV=2	DNA binding;metal ion binding;protein binding	3	0	0	0	0	0	0	0	0	0	1	1	1	0	3	antioxidant activity	4	1.3468		Antioxidant activity	1.3468						Cell proliferation	2.52101
P13645	Keratin, type I cytoskeletal 10 OS=Homo sapiens GN=KRT10 PE=1 SV=6	structural molecule activity	4	0	1	0	0	0	0	0	0	0	0	0	0	0	4	motor activity	7	2.3569		Motor activity	2.3569						Cell deth	2.80112
P04264	Keratin, type II cytoskeletal 1 OS=Homo sapiens GN=KRT1 PE=1 SV=6	catalytic activity;motor activity;protein binding;receptor activity;structural molecule activity;transporter activity	5	1	1	0	1	1	0	1	0	0	0	0	1	0	5	transporter activity	10	3.367		Transporter activity	3.367						Cellular homeostasis	2.2409
P22079	Lactoperoxidase OS=Homo sapiens GN=LPO PE=1 SV=2	antioxidant activity;catalytic activity;metal ion binding	6	1	0	1	0	0	0	0	0	0	0	1	0	0	6	enzime regulator activity	17	5.72391		Enzime regulator activity	5.72391						Coagulation	5.32213
Q2I6W4	Catalase OS=Callithrix jacchus GN=CAT PE=2 SV=3	antioxidant activity;catalytic activity;metal ion binding	7	1	0	1	0	0	0	0	0	0	0	1	0	0	7	receptor activity	5	1.6835		Receptor activity	1.6835						Metabolic process	22.9692
P06733	Alpha-enolase OS=Homo sapiens GN=ENO1 PE=1 SV=2	catalytic activity;DNA binding;metal ion binding;protein binding;RNA binding	8	1	0	0	0	0	0	0	0	1	1	1	1	0	8	metabolic process	2	0.673401		Metabolic process	0.673401						Regulacion of biological process	18.7675
Q5R7D3	Heat shock 70 kDa protein 1 OS=Pongo abelii GN=HSPA1 PE=2 SV=1	nucleotide binding	9	0	0	0	0	0	0	0	0	0	0	0	0	1	9	RNA binding	14	4.7138		RNA binding	4.7138						Response to stimulus	15.1261
P02538	Keratin, type II cytoskeletal 6A OS=Homo sapiens GN=KRT6A PE=1 SV=3	catalytic activity;motor activity;protein binding;structural molecule activity	10	1	1	0	1	0	0	0	0	0	0	0	1	0	10	DNA binding	10	3.367		DNA binding	3.367						Transport	10.3641
Q5R1W6	Transketolase OS=Pan troglodytes GN=TKT PE=2 SV=1	metabolic process	11	0	0	0	0	0	0	0	1	0	0	0	0	0	11	metal ion binding	36	12.1212		Metal ion binding	12.1212						Defence response	5.88235
P35908	Keratin, type II cytoskeletal 2 epidermal OS=Homo sapiens GN=KRT2 PE=1 SV=2	protein binding;structural molecule activity	12	0	1	0	0	0	0	0	0	0	0	0	1	0	12	protein binding	81	27.2727		Protein binding	27.2727
P02788	Lactotransferrin OS=Homo sapiens GN=LTF PE=1 SV=6	catalytic activity;DNA binding;enzyme regulator activity;metal ion binding;protein binding	13	1	0	0	0	0	0	0	0	0	1	1	1	0	13	nucleotide binding	17	5.72391		Nucleotide binding	5.72391
Q02818	Nucleobindin-1 OS=Homo sapiens GN=NUCB1 PE=1 SV=4	DNA binding;metal ion binding;protein binding	14	0	0	0	0	0	0	0	0	0	1	1	1	0		total	297	100			100
P13796	Plastin-2 OS=Homo sapiens GN=LCP1 PE=1 SV=6	metal ion binding;protein binding	15	0	0	0	0	0	0	0	0	0	0	1	1	0
A5A6I6	Serotransferrin OS=Pan troglodytes GN=TF PE=2 SV=1	metal ion binding;transporter activity	16	0	0	0	0	1	0	0	0	0	0	1	0	0
Q96HE7	ERO1-like protein alpha OS=Homo sapiens GN=ERO1A PE=1 SV=2	catalytic activity;nucleotide binding;protein binding	17	1	0	0	0	0	0	0	0	0	0	0	1	1
P13646	Keratin, type I cytoskeletal 13 OS=Homo sapiens GN=KRT13 PE=1 SV=4	structural molecule activity	18	0	1	0	0	0	0	0	0	0	0	0	0	0		151
P06744	Glucose-6-phosphate isomerase OS=Homo sapiens GN=GPI PE=1 SV=4	catalytic activity;protein binding	19	1	0	0	0	0	0	0	0	0	0	0	1	0
P14314	Glucosidase 2 subunit beta OS=Homo sapiens GN=PRKCSH PE=1 SV=2	metal ion binding;protein binding;RNA binding	20	0	0	0	0	0	0	0	0	1	0	1	1	0
P02533	Keratin, type I cytoskeletal 14 OS=Homo sapiens GN=KRT14 PE=1 SV=4	protein binding;structural molecule activity	21	0	1	0	0	0	0	0	0	0	0	0	1	0
P30838	Aldehyde dehydrogenase, dimeric NADP-preferring OS=Homo sapiens GN=ALDH3A1 PE=1 SV=3	catalytic activity;protein binding	22	1	0	0	0	0	0	0	0	0	0	0	1	0
Q6ZN66	Guanylate-binding protein 6 OS=Homo sapiens GN=GBP6 PE=2 SV=1	catalytic activity;nucleotide binding	23	1	0	0	0	0	0	0	0	0	0	0	0	1
P07602	Prosaposin OS=Homo sapiens GN=PSAP PE=1 SV=2	enzyme regulator activity;protein binding	24	0	0	0	0	0	1	0	0	0	0	0	1	0
P15144	Aminopeptidase N OS=Homo sapiens GN=ANPEP PE=1 SV=4	catalytic activity;metal ion binding;receptor activity	25	1	0	0	0	0	0	1	0	0	0	1	0	0
P01024	Complement C3 OS=Homo sapiens GN=C3 PE=1 SV=2	enzyme regulator activity;protein binding	26	0	0	0	0	0	1	0	0	0	0	0	1	0
Q13217	DnaJ homolog subfamily C member 3 OS=Homo sapiens GN=DNAJC3 PE=1 SV=1	enzyme regulator activity;protein binding	27	0	0	0	0	0	1	0	0	0	0	0	1	0
P06396	Gelsolin OS=Homo sapiens GN=GSN PE=1 SV=1	metal ion binding;protein binding	28	0	0	0	0	0	0	0	0	0	0	1	1	0
P19013	Keratin, type II cytoskeletal 4 OS=Homo sapiens GN=KRT4 PE=1 SV=4	protein binding;structural molecule activity	29	1	0	0	0	0	0	0	0	0	0	0	1	0
O75083	WD repeat-containing protein 1 OS=Homo sapiens GN=WDR1 PE=1 SV=4	protein binding	30	0	0	0	0	0	0	0	0	0	0	0	1	0
P31939	Bifunctional purine biosynthesis protein PURH OS=Homo sapiens GN=ATIC PE=1 SV=3	catalytic activity;protein binding	31	1	0	0	0	0	0	0	0	0	0	0	1	0
P15311	Ezrin OS=Homo sapiens GN=EZR PE=1 SV=4	protein binding;RNA binding	32	0	0	0	0	0	0	0	0	1	0	0	1	0
P04196	Histidine-rich glycoprotein OS=Homo sapiens GN=HRG PE=1 SV=1	enzyme regulator activity;metal ion binding;protein binding	33	0	0	0	0	0	1	0	0	0	0	1	1	0
P49257	Protein ERGIC-53 OS=Homo sapiens GN=LMAN1 PE=1 SV=2	metal ion binding;protein binding	34	0	0	0	0	0	0	0	0	0	0	1	1	0
H2N4I1	Sulfhydryl oxidase 1 OS=Pongo abelii GN=QSOX1 PE=3 SV=2	catalytic activity	35	1	0	0	0	0	0	0	0	0	0	0	0	0
P01008	Antithrombin-III OS=Homo sapiens GN=SERPINC1 PE=1 SV=1	enzyme regulator activity;protein binding	36	0	0	0	0	0	1	0	0	0	0	0	1	0
P43251	Biotinidase OS=Homo sapiens GN=BTD PE=1 SV=2	catalytic activity	37	1	0	0	0	0	0	0	0	0	0	0	0	0
P10909	Clusterin OS=Homo sapiens GN=CLU PE=1 SV=1	catalytic activity;protein binding	38	1	0	0	0	0	0	0	0	0	0	0	1	0
P0C0L4	Complement C4-A OS=Homo sapiens GN=C4A PE=1 SV=2	enzyme regulator activity;protein binding	39	0	0	0	0	0	1	0	0	0	0	0	1	0
P01871	Ig mu chain C region OS=Homo sapiens GN=IGHM PE=1 SV=3	DNA binding;protein binding	40	0	0	0	0	0	0	0	0	0	1	0	1	0
Q6IE36	Ovostatin homolog 2 OS=Homo sapiens GN=OVOS2 PE=2 SV=2	enzyme regulator activity	41	0	0	0	0	0	1	0	0	0	0	0	0	0
Q9UBG3	Cornulin OS=Homo sapiens GN=CRNN PE=1 SV=1	metal ion binding	42	0	0	0	0	0	0	0	0	0	0	1	0	0
P14923	Junction plakoglobin OS=Homo sapiens GN=JUP PE=1 SV=3	protein binding;signal transducer activity;structural molecule activity	43	0	1	0	0	0	0	0	0	0	0	0	1	0
Q4R4T8	Legumain OS=Macaca fascicularis GN=LGMN PE=2 SV=1	catalytic activity	44	1	0	0	0	0	0	0	0	0	0	0	0	0
G7MVY8	Furin OS=Macaca mulatta GN=FURIN PE=2 SV=1	catalytic activity;enzyme regulator activity;protein binding	45	1	0	0	0	0	1	0	0	0	0	0	1	0
F7HCH2	Serum albumin OS=Macaca mulatta GN=ALB PE=4 SV=1	DNA binding;protein binding	46	0	0	0	0	0	0	0	0	0	1	0	1	0
F6RLH5	Heat shock cognate 71 kDa protein isoform 1 OS=Macaca mulatta GN=HSPA8 PE=2 SV=1	catalytic activity;nucleotide binding;protein binding	47	1	0	0	0	0	0	0	0	0	0	0	1	1
F7F0E8	Pyruvate kinase OS=Macaca mulatta GN=PKM PE=3 SV=1	catalytic activity;metal ion binding	49	1	0	0	0	0	0	0	0	0	0	1	0	0
F6RRV0	Serine/threonine-protein phosphatase 2A 65 kDa regulatory subunit A alpha isoform OS=Macaca mulatta GN=PPP2R1A PE=2 SV=1	catalytic activity;enzyme regulator activity;protein binding	51	1	0	0	0	0	1	0	0	0	0	0	1	0
F7GYM9	Plastin-3 isoform 1 OS=Macaca mulatta GN=PLS3 PE=2 SV=1	metal ion binding;protein binding	52	0	0	0	0	0	0	0	0	0	0	1	1	0
F7FMQ2	CRP55 OS=Macaca mulatta GN=CALR PE=2 SV=1	metal ion binding;protein binding;RNA binding	53	0	0	0	0	0	0	0	0	1	0	1	1	0
F7H193	Leukotriene A(4) hydrolase OS=Macaca mulatta GN=LTA4H PE=3 SV=1	catalytic activity;metal ion binding	54	1	0	0	0	0	0	0	0	0	0	1	0	0
F7EZT6	Endoplasmin OS=Macaca mulatta GN=HSP90B1 PE=2 SV=1	nucleotide binding;protein binding;RNA binding	56	0	0	0	0	0	0	0	0	1	0	0	1	1
F7C1B5	Aldehyde dehydrogenase OS=Macaca mulatta GN=ALDH3A2 PE=3 SV=1	catalytic activity	57	1	0	0	0	0	0	0	0	0	0	0	0	0
F7H7V0	Desmoplakin-3 OS=Macaca mulatta GN=JUP PE=2 SV=1	protein binding;signal transducer activity;structural molecule activity	58	0	1	0	0	0	0	0	0	0	0	0	1	0
F6W5A7	Matrix metalloproteinase-9 OS=Macaca mulatta GN=MMP9 PE=2 SV=1	catalytic activity;metal ion binding;protein binding	59	1	0	0	0	0	0	0	0	0	0	1	1	0
F7BCV3	Endoplasmic reticulum lectin 1 isoform 1 OS=Macaca mulatta GN=ERLEC1 PE=2 SV=1	protein binding	60	0	0	0	0	0	0	0	0	0	0	0	1	0
P13647	Keratin, type II cytoskeletal 5 OS=Homo sapiens GN=KRT5 PE=1 SV=3	catalytic activity;motor activity;protein binding;structural molecule activity	61	1	1	0	1	0	0	0	0	0	0	0	1	0
Q9H173	Nucleotide exchange factor SIL1 OS=Homo sapiens GN=SIL1 PE=1 SV=1	enzyme regulator activity;nucleotide binding;protein binding	62	0	0	0	0	0	1	0	0	0	0	0	1	1
P30740	Leukocyte elastase inhibitor OS=Homo sapiens GN=SERPINB1 PE=1 SV=1	enzyme regulator activity	63	0	0	0	0	0	1	0	0	0	0	0	0	0
B1MTB7	Serpin B5 OS=Callicebus moloch GN=SERPINB5 PE=3 SV=1	enzyme regulator activity	64	0	0	0	0	0	1	0	0	0	0	0	0	0
P50417	Haptoglobin OS=Ateles geoffroyi GN=HP PE=2 SV=1	antioxidant activity;catalytic activity;protein binding	65	1	0	1	0	0	0	0	0	0	0	0	1	0
O43813	LanC-like protein 1 OS=Homo sapiens GN=LANCL1 PE=1 SV=1	catalytic activity;metal ion binding;protein binding;receptor activity;signal transducer activity	66	1	0	0	0	0	0	1	0	0	0	1	1	0
A5A6I5	Fructose-bisphosphate aldolase A OS=Pan troglodytes GN=ALDOA PE=2 SV=1	catalytic activity	67	1	0	0	0	0	0	0	0	0	0	0	0	0
P40394	Alcohol dehydrogenase class 4 mu/sigma chain OS=Homo sapiens GN=ADH7 PE=1 SV=2	catalytic activity;metal ion binding;protein binding	68	1	0	0	0	0	0	0	0	0	0	1	1	0
P23280	Carbonic anhydrase 6 OS=Homo sapiens GN=CA6 PE=1 SV=3	catalytic activity;metal ion binding	69	1	0	0	0	0	0	0	0	0	0	1	0	0
P07858	Cathepsin B OS=Homo sapiens GN=CTSB PE=1 SV=3	catalytic activity;protein binding	70	1	0	0	0	0	0	0	0	0	0	0	1	0
P23280	Carbonic anhydrase 6 OS=Homo sapiens GN=CA6 PE=1 SV=3	catalytic activity;metal ion binding	71	1	0	0	0	0	0	0	0	0	0	1	0	0
P40926	Malate dehydrogenase, mitochondrial OS=Homo sapiens GN=MDH2 PE=1 SV=3	catalytic activity;nucleotide binding;protein binding;RNA binding	72	1	0	0	0	0	0	0	0	1	0	0	1	1
P06753	Tropomyosin alpha-3 chain OS=Homo sapiens GN=TPM3 PE=1 SV=2	protein binding	73	0	0	0	0	0	0	0	0	0	0	0	1	0
P10909	Clusterin OS=Homo sapiens GN=CLU PE=1 SV=1	catalytic activity;protein binding	74	1	0	0	0	0	0	0	0	0	0	0	1	0
P07951	Tropomyosin beta chain OS=Homo sapiens GN=TPM2 PE=1 SV=1	protein binding;structural molecule activity	75	0	1	0	0	0	0	0	0	0	0	0	1	0
P24855	Deoxyribonuclease-1 OS=Homo sapiens GN=DNASE1 PE=1 SV=1	catalytic activity;protein binding	76	1	0	0	0	0	0	0	0	0	0	0	1	0
Q92820	Gamma-glutamyl hydrolase OS=Homo sapiens GN=GGH PE=1 SV=2	catalytic activity	77	1	0	0	0	0	0	0	0	0	0	0	0	0
P07996	Thrombospondin-1 OS=Homo sapiens GN=THBS1 PE=1 SV=2	metal ion binding;protein binding	78	0	0	0	0	0	0	0	0	0	0	1	1	0
O60218	Aldo-keto reductase family 1 member B10 OS=Homo sapiens GN=AKR1B10 PE=1 SV=2	catalytic activity;protein binding	79	1	0	0	0	0	0	0	0	0	0	0	1	0
Q5T2L2	Putative aldo-keto reductase family 1 member C8 OS=Homo sapiens GN=AKR1C8P PE=5 SV=2	catalytic activity	80	1	0	0	0	0	0	0	0	0	0	0	0	0
O00584	Ribonuclease T2 OS=Homo sapiens GN=RNASET2 PE=1 SV=2	catalytic activity;RNA binding	81	1	0	0	0	0	0	0	0	1	0	0	0	0
A5A6N7	L-lactate dehydrogenase B chain OS=Pan troglodytes GN=LDHB PE=2 SV=1	catalytic activity	82	1	0	0	0	0	0	0	0	0	0	0	0	0
P04264	Keratin, type II cytoskeletal 1 OS=Homo sapiens GN=KRT1 PE=1 SV=6	catalytic activity;motor activity;protein binding;receptor activity;structural molecule activity;transporter activity	83	1	1	0	1	1	0	1	0	0	0	0	1	0
P35908	Keratin, type II cytoskeletal 2 epidermal OS=Homo sapiens GN=KRT2 PE=1 SV=2	protein binding;structural molecule activity	84	0	1	0	0	0	0	0	0	0	0	0	1	0
Q6DTV9	Peptidyl-prolyl cis-trans isomerase A OS=Aotus trivirgatus GN=PPIA PE=2 SV=3	catalytic activity	86	1	0	0	0	0	0	0	0	0	0	0	0	0
P02538	Keratin, type II cytoskeletal 6A OS=Homo sapiens GN=KRT6A PE=1 SV=3	catalytic activity;motor activity;protein binding;structural molecule activity	87	1	1	0	1	0	0	0	0	0	0	0	1	0
P23284	Peptidyl-prolyl cis-trans isomerase B OS=Homo sapiens GN=PPIB PE=1 SV=2	catalytic activity;protein binding;RNA binding	88	1	0	0	0	0	0	0	0	1	0	0	1	0
P28325	Cystatin-D OS=Homo sapiens GN=CST5 PE=1 SV=1	enzyme regulator activity;protein binding	89	0	0	0	0	0	1	0	0	0	0	0	1	0
Q16769	Glutaminyl-peptide cyclotransferase OS=Homo sapiens GN=QPCT PE=1 SV=1	catalytic activity;metal ion binding	90	1	0	0	0	0	0	0	0	0	0	1	0	0
Q9NQX5	Neural proliferation differentiation and control protein 1 OS=Homo sapiens GN=NPDC1 PE=1 SV=2	protein binding	91	0	0	0	0	0	0	0	0	0	0	0	1	0
Q5JXB2	Putative ubiquitin-conjugating enzyme E2 N-like OS=Homo sapiens GN=UBE2NL PE=1 SV=1	catalytic activity	92	1	0	0	0	0	0	0	0	0	0	0	0	0
Q96DA0	Zymogen granule protein 16 homolog B OS=Homo sapiens GN=ZG16B PE=1 SV=3		93	0	0	0	0	0	0	0	0	0	0	0	0	0
Q7RTS7	Keratin, type II cytoskeletal 74 OS=Homo sapiens GN=KRT74 PE=1 SV=2	protein binding;structural molecule activity	94	0	1	0	0	0	0	0	0	0	0	0	1	0
P04406	Glyceraldehyde-3-phosphate dehydrogenase OS=Homo sapiens GN=GAPDH PE=1 SV=3	catalytic activity;nucleotide binding;protein binding	95	1	0	0	0	0	0	0	0	0	0	0	1	1
F7B786	Cytokeratin-1 OS=Macaca mulatta GN=KRT1 PE=3 SV=1	catalytic activity;motor activity;structural molecule activity	96	1	1	0	1	0	0	0	0	0	0	0	0	0
F7GTQ0	Uncharacterized protein OS=Macaca mulatta GN=QPCT PE=4 SV=1	catalytic activity;metal ion binding	99	1	0	0	0	0	0	0	0	0	0	1	0	0
G7PUB9	Nucleoside diphosphate kinase OS=Macaca fascicularis GN=EGM_07722 PE=3 SV=1	catalytic activity;nucleotide binding	101	1	0	0	0	0	0	0	0	0	0	0	0	1
G7PRG1	Putative uncharacterized protein OS=Macaca fascicularis GN=EGM_06639 PE=3 SV=1	transporter activity	102	0	0	0	0	1	0	0	0	0	0	0	0	0
P81605	Dermcidin OS=Homo sapiens GN=DCD PE=1 SV=2	catalytic activity;protein binding;RNA binding	103	1	0	0	0	0	0	0	0	1	0	0	1	0
P07737	Profilin-1 OS=Homo sapiens GN=PFN1 PE=1 SV=2	enzyme regulator activity;nucleotide binding;protein binding;RNA binding	104	0	0	0	0	0	1	0	0	1	0	0	1	1
P29373	Cellular retinoic acid-binding protein 2 OS=Homo sapiens GN=CRABP2 PE=1 SV=2	protein binding;transporter activity	105	0	0	0	0	1	0	0	0	0	0	0	1	0
Q01469	Fatty acid-binding protein, epidermal OS=Homo sapiens GN=FABP5 PE=1 SV=3	protein binding;transporter activity	106	0	0	0	0	1	0	0	0	0	0	0	1	0
Q8I030	Cystatin-B OS=Pan troglodytes GN=CSTB PE=3 SV=1	enzyme regulator activity;protein binding	107	0	0	0	0	0	1	0	0	0	0	0	1	0
O19093	Cystatin-C OS=Saimiri sciureus GN=CST3 PE=2 SV=1	enzyme regulator activity	108	0	0	0	0	0	1	0	0	0	0	0	0	0
Q14697	Neutral alpha-glucosidase AB OS=Homo sapiens GN=GANAB PE=1 SV=3	catalytic activity;RNA binding	109	1	0	0	0	0	0	0	0	1	0	0	0	0
P01040	Cystatin-A OS=Homo sapiens GN=CSTA PE=1 SV=1	enzyme regulator activity;protein binding;structural molecule activity	110	0	1	0	0	0	1	0	0	0	0	0	1	0
P27482	Calmodulin-like protein 3 OS=Homo sapiens GN=CALML3 PE=1 SV=2	metal ion binding;protein binding	111	0	0	0	0	0	0	0	0	0	0	1	1	0
Q1KLX0	Cathelicidin antimicrobial peptide OS=Saguinus oedipus GN=CAMP PE=3 SV=1		112	0	0	0	0	0	0	0	0	0	0	0	0	0
Q5R9M3	Thioredoxin OS=Pongo abelii GN=TXN PE=3 SV=3	catalytic activity	113	0	0	0	0	0	0	0	0	0	0	0	0	0
P47929	Galectin-7 OS=Homo sapiens GN=LGALS7 PE=1 SV=2		114	1	0	0	0	0	0	0	0	0	0	0	0	0
P61561	Syncytin-1 OS=Gorilla gorilla gorilla GN=ERVW-1 PE=3 SV=1		115	0	0	0	0	0	0	0	0	0	0	0	0	0
P06768	Retinol-binding protein 2 OS=Rattus norvegicus GN=Rbp2 PE=1 SV=3	transporter activity	116	0	0	0	0	1	0	0	0	0	0	0	0	0
O77523	Beta-2-microglobulin OS=Alouatta seniculus GN=B2M PE=3 SV=1	protein binding	117	0	0	0	0	0	0	0	0	0	0	0	1	0
P25445	Tumor necrosis factor receptor superfamily member 6 OS=Homo sapiens GN=FAS PE=1 SV=1	protein binding;receptor activity;signal transducer activity	118	0	0	0	0	0	0	1	1	0	0	0	1	0
G7PUP9	Cytokeratin-10 (Fragment) OS=Macaca fascicularis GN=EGM_07881 PE=3 SV=1	structural molecule activity	119	0	1	0	0	0	0	0	0	0	0	1	0	0
G7PQY2	Putative uncharacterized protein OS=Macaca fascicularis GN=EGM_05959 PE=3 SV=1	metal ion binding;transporter activity	120	0	0	0	0	1	0	0	0	0	0	1	0	0
G7PUP9	Cytokeratin-10 (Fragment) OS=Macaca fascicularis GN=EGM_07881 PE=3 SV=1	structural molecule activity	121	0	1	0	0	0	0	0	0	0	0	0	0	0
G7PID3	Cytokeratin-2e OS=Macaca fascicularis GN=EGM_03270 PE=3 SV=1	structural molecule activity	122	0	1	0	0	0	0	0	0	0	0	0	0	0
G7PUS5	Putative uncharacterized protein OS=Macaca fascicularis GN=EGM_07909 PE=3 SV=1	structural molecule activity	123	0	1	0	0	0	0	0	0	0	0	0	0	0
G7PQY3	Hemoglobin beta chain OS=Macaca fascicularis GN=EGM_05960 PE=3 SV=1	metal ion binding;transporter activity	124	0		0	0	1	0	0	0	0	0	1	0	0
G7PIC8	Cytokeratin-6C OS=Macaca fascicularis GN=EGM_03263 PE=3 SV=1	structural molecule activity	125	0	1	0	0	0	0	0	0	0	0	0	0	0
G7PID4	Cytokeratin-1B OS=Macaca fascicularis GN=EGM_03272 PE=3 SV=1	structural molecule activity	126	0	1	0	0	0	0	0	0	0	0	0	0	0
G7P2N0	Histone H4 OS=Macaca fascicularis GN=EGM_03027 PE=3 SV=1	DNA binding;protein binding	127	0	0	0	0	0	0	0	0	0	1	0	0	0
G7PHX5	Putative uncharacterized protein OS=Macaca fascicularis GN=EGM_03325 PE=4 SV=1	catalytic activity	128	1	0	0	0	0	0	0	0	0	0	0	0	0
G8F2G9	Putative uncharacterized protein OS=Macaca fascicularis GN=EGM_20828 PE=3 SV=1	protein binding	129	0	0	0	0	0	0	0	0	0	0	0	1	0
G7P5L7	Putative uncharacterized protein OS=Macaca fascicularis GN=EGM_14426 PE=4 SV=1		130	0	0	0	0	0	0	0	0	0	0	0	0	0
G7NY31	Putative uncharacterized protein OS=Macaca fascicularis GN=EGM_10710 PE=3 SV=1	metal ion binding	131	0	0	0	0	0	0	0	0	0	0	1	0	0
G7NUG4	Protein S100 OS=Macaca fascicularis GN=EGM_01110 PE=3 SV=1	metal ion binding	132	0	0	0	0	0	0	0	0	0	0	1	0	0
G7P7Z2	Thioltransferase-1 OS=Macaca fascicularis GN=EGM_15245 PE=4 SV=1	catalytic activity	133	1	0	0	0	0	0	0	0	0	0	0	0	0
G7PT41	Putative uncharacterized protein OS=Macaca fascicularis GN=EGM_08265 PE=3 SV=1	nucleotide binding	134	0	0	0	0	0	0	0	0	0	0	0	0	1
G7P2N4	Histone H1c OS=Macaca fascicularis GN=EGM_13318 PE=3 SV=1	DNA binding	135	0	0	0	0	0	0	0	0	0	1	0	0	0
G7PGL4	Putative uncharacterized protein OS=Macaca fascicularis GN=EGM_02177 PE=4 SV=1		136	0	0	0	0	0	0	0	0	0	0	0	0	0
G7PUF6	Putative uncharacterized protein OS=Macaca fascicularis GN=EGM_07763 PE=4 SV=1	antioxidant activity;catalytic activity	137	1	0	1	0	0	0	0	0	0	0	0	0	0
G7PTX9	Transcription elongation factor SPT6 OS=Macaca fascicularis GN=EGM_07555 PE=4 SV=1	catalytic activity;DNA binding;protein binding;RNA binding	138	1	0	0	0	0	0	0	0	1	1	0	1	0
G7PWZ9	Polyubiquitin-C OS=Macaca fascicularis GN=EGM_09461 PE=4 SV=1	protein binding;structural molecule activity	139	0	1	0	0	0	0	0	0	0	0	0	1	0
G7NZC8	Elongation factor 1-alpha OS=Macaca fascicularis GN=EGM_10569 PE=3 SV=1	catalytic activity;nucleotide binding;RNA binding	140	1	0	0	0	0	0	0	0	1	0	0	0	1
P35908	Keratin, type II cytoskeletal 2 epidermal OS=Homo sapiens GN=KRT2 PE=1 SV=2	protein binding;structural molecule activity	141	0	1	0	0	0	0	0	0	0	0	0	1	0
P05109	Protein S100-A8 OS=Homo sapiens GN=S100A8 PE=1 SV=1	metal ion binding;protein binding	142	0	0	0	0	0	0	0	0	0	0	1	1	0
P04259	Keratin, type II cytoskeletal 6B OS=Homo sapiens GN=KRT6B PE=1 SV=5	catalytic activity;motor activity;protein binding;structural molecule activity	143	1	1	0	1	0	0	0	0	0	0	0	1	0
Q95M66	Beta-defensin 1 OS=Saguinus oedipus GN=DEFB1 PE=3 SV=1		145	0	0	0	0	0	0	0	0	0	0	0	0	0
A0SXL6	Elongation factor 2 OS=Callithrix jacchus GN=EEF2 PE=2 SV=1	catalytic activity;nucleotide binding;RNA binding	146	1	0	0	0	0	0	0	0	1	0	0	0	1
P06703	Protein S100-A6 OS=Homo sapiens GN=S100A6 PE=1 SV=1	metal ion binding;protein binding;transporter activity	147	0	0	0	0	1	0	0	0	0	0	1	1	0
P35754	Glutaredoxin-1 OS=Homo sapiens GN=GLRX PE=1 SV=2	catalytic activity;protein binding	148	1	0	0	0	0	0	0	0	0	0	0	1	0
P54652	Heat shock-related 70 kDa protein 2 OS=Homo sapiens GN=HSPA2 PE=1 SV=1	nucleotide binding;protein binding	149	1	0	0	0	0	0	0	0	0	0	0	1	1
F6TDW8	Histone H2A (Fragment) OS=Macaca mulatta GN=LOC705636 PE=3 SV=1	DNA binding;protein binding	150	0	0	0	0	0	0	0	0	0	1	0	1	0
F7H2F8	Collectin subfamily member 11		151	0	0	0	0	0	0	0	0	0	0	0	0	0
F6QAX2	Tubulin beta chain	catalytic activity;nucleotide binding;structural molecule activity	152	1	1	0	0	0	0	0	0	0	0	0	0	1
Q6S8J3	POTE ankyrin domain family member E OS=Homo sapiens GN=POTEE PE=1 SV=3	protein binding	153	0	0	0	0	0	0	0	0	0	0	0	1	0
G7PJP0	Gamma-enolase OS=Macaca fascicularis GN=EGM_02922 PE=3 SV=1	catalytic activity;metal ion binding	154	1	0	0	0	0	0	0	0	0	0	1	0	0
F6RSN8	Uncharacterized protein OS=Macaca mulatta GN=SDHA PE=4 SV=1	catalytic activity	155	1	0	0	0	0	0	0	0	0	0	0	0	0
F6TII3	Actin gamma 1	nucleotide binding;protein binding;structural molecule activity	157	0	1	0	0	0	0	0	0	0	0	0	1	1
				66	28	4	7	10	17	5	2	14	10	36	81	17
	tabla completa y verificada
		proteins identified on host defence		25
		proteins identified involed in sensory perception of astringency and bitter taste		17

## Sheet: David enrichemnt_clustering
P11021
P35527			Category	Term	PValue		Count	%	PValue	Genes	List Total	Pop Hits	Pop Total	Fold Enrichment	Bonferroni	Benjamini	FDR
P80303			GOTERM_BP_DIRECT	GO:0010951	1.5349e-05	negative regulation of endopeptidase activity	7	5.55556	1.5349e-05	P04196, P30740, P01040, P01008, P01024, P0C0L4, Q6IE36	75	121	16792	12.9525	0.00895423	0.00895423	0.0225936			negative regulation of endopeptidase activity
P13645			GOTERM_BP_DIRECT	GO:0008544	3.61333e-05	epidermis development	6	4.7619	3.61333e-05	Q01469, P13647, P02533, P35527, P29373, P35908	75	85	16792	15.8042	0.0209519	0.0105314	0.0531805			P01024 complement C3(C3) Homo sapiens
P04264			GOTERM_BP_DIRECT	GO:0001895	0.000721973	retina homeostasis	4	3.1746	0.000721973	P02788, Q96DA0, Q6S8J3, P04264	75	40	16792	22.3893	0.345071	0.131577	1.0576			P0C0L4 complement C4A (Rodgers blood group)(C4A) Homo sapiens
P22079			GOTERM_BP_DIRECT	GO:0006094	0.000955653	gluconeogenesis	4	3.1746	0.000955653	P04406, P40926, P06733, P06744	75	44	16792	20.3539	0.428951	0.130703	1.39768			P01040 cystatin A(CSTA) Homo sapiens
Q2I6W4			GOTERM_BP_DIRECT	GO:0002576	0.00110521	platelet degranulation	5	3.96825	0.00110521	P04196, O75083, P10909, P07996, P07602	75	103	16792	10.8686	0.476913	0.121555	1.61475			P04196 histidine rich glycoprotein(HRG) Homo sapiens
P06733			GOTERM_BP_DIRECT	GO:0061621	0.00581469	canonical glycolysis	3	2.38095	0.00581469	P04406, P06733, P06744	75	26	16792	25.8338	0.967201	0.434225	8.2269			Q6IE36 ovostatin 2(OVOS2) Homo sapiens
Q5R7D3			GOTERM_BP_DIRECT	GO:0050832	0.00626205	defense response to fungus	3	2.38095	0.00626205	P04196, P81605, P05109	75	27	16792	24.877	0.974805	0.40896	8.83296			P30740 serpin family B member 1(SERPINB1) Homo sapiens
P02538			GOTERM_BP_DIRECT	GO:0006457	0.00820333	protein folding	5	3.96825	0.00820333	Q9H173, P14314, Q14697, Q96HE7, P49257	75	180	16792	6.21926	0.991989	0.453036	11.4199			P01008 serpin family C member 1(SERPINC1) Homo sapiens
Q5R1W6			GOTERM_BP_DIRECT	GO:0006958	0.00952288	complement activation, classical pathway	4	3.1746	0.00952288	P01871, P10909, P01024, P0C0L4	75	99	16792	9.0462	0.996328	0.463676	13.1392
P35908			GOTERM_BP_DIRECT	GO:0006096	0.00981175	glycolytic process	3	2.38095	0.00981175	P04406, P06733, P06744	75	34	16792	19.7553	0.996905	0.438873	13.5114			proteolysis
P02788			GOTERM_BP_DIRECT	GO:0010043	0.0109563	response to zinc ion	3	2.38095	0.0109563	P02533, P05109, Q92820	75	36	16792	18.6578	0.998429	0.443947	14.9715			P15144 alanyl aminopeptidase, membrane(ANPEP) Homo sapiens
Q02818			GOTERM_BP_DIRECT	GO:2001027	0.0131632	negative regulation of endothelial cell chemotaxis	2	1.5873	0.0131632	P04196, P07996	75	3	16792	149.262	0.999576	0.476423	17.7222			P07858 cathepsin B(CTSB) Homo sapiens
P13796			GOTERM_BP_DIRECT	GO:0051603	0.0189627	proteolysis involved in cellular protein catabolic process	3	2.38095	0.0189627	P07858, P11021, Q13217	75	48	16792	13.9933	0.999987	0.5781	24.5606			P01024 complement C3(C3) Homo sapiens
A5A6I6			GOTERM_BP_DIRECT	GO:0050821	0.0221866	protein stabilization	4	3.1746	0.0221866	P07737, P04406, P23284, P10909	75	136	16792	6.5851	0.999998	0.60903	28.1291			P0C0L4 complement C4A (Rodgers blood group)(C4A) Homo sapiens
Q96HE7			GOTERM_BP_DIRECT	GO:0006508	0.0227977	proteolysis	7	5.55556	0.0227977	P81605, P02788, P07858, P01024, P15144, Q92820, P0C0L4	75	500	16792	3.13451	0.999999	0.593812	28.7875			P81605 dermcidin(DCD) Homo sapiens
P13646			GOTERM_BP_DIRECT	GO:0042742	0.0261858	defense response to bacterium	4	3.1746	0.0261858	P81605, P22079, Q6ZN66, P05109	75	145	16792	6.17637	1	0.621612	32.3371			Q92820 gamma-glutamyl hydrolase(GGH) Homo sapiens
P06744			GOTERM_BP_DIRECT	GO:2000427	0.0304485	positive regulation of apoptotic cell clearance	2	1.5873	0.0304485	P01024, P0C0L4	75	7	16792	63.9695	1	0.655579	36.5688			P02788 lactotransferrin(LTF) Homo sapiens
P14314			GOTERM_BP_DIRECT	GO:0007010	0.034187	cytoskeleton organization	4	3.1746	0.034187	P04259, P19013, P13647, P13646	75	161	16792	5.56257	1	0.677756	40.0757
P02533			GOTERM_BP_DIRECT	GO:0030855	0.0381638	epithelial cell differentiation	3	2.38095	0.0381638	P19013, P02533, P07858	75	70	16792	9.59543	1	0.698836	43.6073
P30838			GOTERM_BP_DIRECT	GO:0002544	0.0389789	chronic inflammatory response	2	1.5873	0.0389789	P05109, P07996	75	9	16792	49.7541	1	0.688057	44.3067			oxidation-reduction process
Q6ZN66			GOTERM_BP_DIRECT	GO:0051918	0.0432162	negative regulation of fibrinolysis	2	1.5873	0.0432162	P04196, P07996	75	10	16792	44.7787	1	0.708517	47.8145			ID Gene Name Species
P07602			GOTERM_BP_DIRECT	GO:0010737	0.0432162	protein kinase A signaling	2	1.5873	0.0432162	P15311, P13796	75	10	16792	44.7787	1	0.708517	47.8145			P40394 alcohol dehydrogenase 7 (class IV), mu or sigma polypeptide(ADH7) Homo sapiens
P15144			GOTERM_BP_DIRECT	GO:0045454	0.0453425	cell redox homeostasis	3	2.38095	0.0453425	P35754, P02788, Q96HE7	75	77	16792	8.72312	1	0.709455	49.496			P30838 aldehyde dehydrogenase 3 family member A1(ALDH3A1) Homo sapiens
P01024			GOTERM_BP_DIRECT	GO:0055114	0.0461396	oxidation-reduction process	7	5.55556	0.0461396	P30838, P35754, P22079, P40394, Q96HE7, Q5T2L2, O60218	75	592	16792	2.64739	1	0.69987	50.1132			O60218 aldo-keto reductase family 1 member B10(AKR1B10) Homo sapiens
Q13217			GOTERM_BP_DIRECT	GO:0006081	0.0474352	cellular aldehyde metabolic process	2	1.5873	0.0474352	P30838, O60218	75	11	16792	40.7079	1	0.694736	51.1015			Q5T2L2 aldo-keto reductase family 1 member C8, pseudogene(AKR1C8P) Homo sapiens
P06396			GOTERM_BP_DIRECT	GO:0007016	0.0474352	cytoskeletal anchoring at plasma membrane	2	1.5873	0.0474352	P15311, P14923	75	11	16792	40.7079	1	0.694736	51.1015			Q96HE7 endoplasmic reticulum oxidoreductase 1 alpha(ERO1A) Homo sapiens
P19013			GOTERM_BP_DIRECT	GO:0031581	0.0516357	hemidesmosome assembly	2	1.5873	0.0516357	P13647, P02533	75	12	16792	37.3156	1	0.711399	54.1816			P35754 glutaredoxin(GLRX) Homo sapiens
O75083			GOTERM_BP_DIRECT	GO:0097284	0.055818	hepatocyte apoptotic process	2	1.5873	0.055818	P06396, P25445	75	13	16792	34.4451	1	0.725973	57.0679			P22079 lactoperoxidase(LPO) Homo sapiens
P31939			GOTERM_BP_DIRECT	GO:0034975	0.055818	protein folding in endoplasmic reticulum	2	1.5873	0.055818	Q96HE7, P11021	75	13	16792	34.4451	1	0.725973	57.0679
P15311			GOTERM_BP_DIRECT	GO:0006956	0.0563776	complement activation	3	2.38095	0.0563776	P10909, P01024, P0C0L4	75	87	16792	7.72046	1	0.716189	57.4409			complement activation, classical pathway
P04196			GOTERM_BP_DIRECT	GO:0042573	0.0599821	retinoic acid metabolic process	2	1.5873	0.0599821	P40394, P29373	75	14	16792	31.9848	1	0.725983	59.7725			ID Gene Name Species
P49257			GOTERM_BP_DIRECT	GO:0043537	0.0599821	negative regulation of blood vessel endothelial cell migration	2	1.5873	0.0599821	P04196, P07996	75	14	16792	31.9848	1	0.725983	59.7725			P10909 clusterin(CLU) Homo sapiens
H2N4I1			GOTERM_BP_DIRECT	GO:0006807	0.0599821	nitrogen compound metabolic process	2	1.5873	0.0599821	P43251, P14314	75	14	16792	31.9848	1	0.725983	59.7725			P01024 complement C3(C3) Homo sapiens
P01008			GOTERM_BP_DIRECT	GO:0045104	0.0641281	intermediate filament cytoskeleton organization	2	1.5873	0.0641281	Q7RTS7, P02538	75	15	16792	29.8524	1	0.737957	62.3069			P0C0L4 complement C4A (Rodgers blood group)(C4A) Homo sapiens
P43251			GOTERM_BP_DIRECT	GO:0045109	0.0682561	intermediate filament organization	2	1.5873	0.0682561	P35527, P35908	75	16	16792	27.9867	1	0.748661	64.6818			P01871 immunoglobulin heavy constant mu(IGHM) Homo sapiens
P10909			GOTERM_BP_DIRECT	GO:0016337	0.073202	single organismal cell-cell adhesion	3	2.38095	0.073202	P01040, Q9UBG3, P14923	75	101	16792	6.6503	1	0.762364	67.3435
P0C0L4			GOTERM_BP_DIRECT	GO:0045471	0.0782735	response to ethanol	3	2.38095	0.0782735	P40394, P05109, Q92820	75	105	16792	6.39695	1	0.775211	69.8776
P01871			GOTERM_BP_DIRECT	GO:0006954	0.0861181	inflammatory response	5	3.96825	0.0861181	P25445, P05109, P07996, P01024, P0C0L4	75	379	16792	2.95374	1	0.797929	73.4391			protein stabilization
Q6IE36			GOTERM_BP_DIRECT	GO:0042730	0.0886279	fibrinolysis	2	1.5873	0.0886279	P04196, P04264	75	21	16792	21.3232	1	0.798003	74.493			P10909 clusterin(CLU) Homo sapiens
Q9UBG3																				P04406 glyceraldehyde-3-phosphate dehydrogenase(GAPDH) Homo sapiens
P14923																				P23284 peptidylprolyl isomerase B(PPIB) Homo sapiens
Q4R4T8																				P07737 profilin 1(PFN1) Homo sapiens
G7MVY8
F7HCH2			% WARNING - This is exported REVIGO data useful only for the specific purpose of constructing a TreeMap visualization.
F6RLH5			% Do not use this table as a general list of non-redundant GO categories	as it sets an extremely permissive																defense response to bacterium
F7F0E8			% threshold to detect redundancies (c=0.10) and fill the 'representative' column	while normally c>=0.4 is recommended.																P05109 S100 calcium binding protein A8(S100A8) Homo sapiens
F6RRV0			% To export a reduced-redundancy set of GO terms	go to the Scatterplot & Table tab	and export to CSV from there.															P81605 dermcidin(DCD) Homo sapiens
F7GYM9			term_ID	description	frequencyInDb	log10pvalue	uniqueness	dispensability	representative											Q6ZN66 guanylate binding protein family member 6(GBP6) Homo sapiens
F7FMQ2			GO:0008544	epidermis development	0.00058	-4.4425	0.91	0	epidermis development											P22079 lactoperoxidase(LPO) Homo sapiens
F7H193			GO:0010951	negative regulation of endopeptidase activity	0.00157	-4.8153	0.727	0	negative regulation of endopeptidase activity
F7EZT6			GO:0006508	proteolysis	0.05223	-1.6421	0.878	0.292	negative regulation of endopeptidase activity
F7C1B5			GO:0001895	retina homeostasis	0.00015	-3.1415	0.725	0.165	negative regulation of endopeptidase activity											proteolysis involved in cellular protein catabolic process
F7H7V0			GO:0042573	retinoic acid metabolic process	5e-05	-1.222	0.705	0.349	negative regulation of endopeptidase activity											Q13217 DnaJ heat shock protein family (Hsp40) member C3(DNAJC3) Homo sapiens
F6W5A7			GO:0050821	protein stabilization	0.00045	-1.6539	0.781	0.397	negative regulation of endopeptidase activity											P07858 cathepsin B(CTSB) Homo sapiens
F7BCV3			GO:0051603	proteolysis involved in cellular protein catabolic process	0.00759	-1.7221	0.813	0.493	negative regulation of endopeptidase activity											P11021 heat shock protein family A (Hsp70) member 5(HSPA5) Homo sapiens
P13647			GO:2001027	negative regulation of endothelial cell chemotaxis	1e-05	-1.8806	0.58	0.433	negative regulation of endopeptidase activity
Q9H173			GO:0050832	defense response to fungus	0.00028	-2.2033	0.734	0	defense response to fungus
P30740			GO:0006958	complement activation, classical pathway	8e-05	-2.0212	0.675	0.209	defense response to fungus											single organismal cell-cell adhesion
B1MTB7			GO:0010737	protein kinase A signaling	8e-05	-1.3644	0.751	0.21	defense response to fungus											Q9UBG3 cornulin(CRNN) Homo sapiens
P50417			GO:0010043	response to zinc ion	9e-05	-1.9603	0.823	0.211	defense response to fungus											P01040 cystatin A(CSTA) Homo sapiens
O43813			GO:0045471	response to ethanol	0.00016	-1.1064	0.82	0.374	defense response to fungus											P14923 junction plakoglobin(JUP) Homo sapiens
A5A6I5			GO:0006807	nitrogen compound metabolic process	0.38744	-1.222	0.955	0.019	nitrogen compound metabolism
P40394			GO:0034975	protein folding in endoplasmic reticulum	8e-05	-1.2532	0.929	0.02	protein folding in endoplasmic reticulum
P23280			GO:0006457	protein folding	0.00903	-2.086	0.923	0.029	protein folding
P07858			GO:0007010	cytoskeleton organization	0.00786	-1.4661	0.832	0.034	cytoskeleton organization
P40926			GO:0007016	cytoskeletal anchoring at plasma membrane	6e-05	-1.3239	0.668	0.439	cytoskeleton organization
P06753			GO:0031581	hemidesmosome assembly	2e-05	-1.287	0.818	0.311	cytoskeleton organization
P07951			GO:0006094	gluconeogenesis	0.00262	-3.0195	0.803	0.046	gluconeogenesis
P24855			GO:0055114	oxidation-reduction process	0.1506	-1.3359	0.844	0.232	gluconeogenesis
Q92820			GO:0006081	cellular aldehyde metabolic process	0.00753	-1.3239	0.809	0.145	gluconeogenesis
P07996			GO:0002576	platelet degranulation	3e-05	-2.9566	0.831	0.049	platelet degranulation
O60218			GO:2000427	positive regulation of apoptotic cell clearance	2e-05	-1.5164	0.704	0.414	platelet degranulation
Q5T2L2			GO:0016337	single organismal cell-cell adhesion	0.00148	-1.1355	0.889	0.066	single organismal cell-cell adhesion
O00584			GO:0097284	hepatocyte apoptotic process	2e-05	-1.2532	0.862	0.088	hepatocyte apoptotic process
A5A6N7
Q6DTV9
P23284
P28325
Q16769
Q9NQX5
Q5JXB2
Q96DA0
Q7RTS7
P04406
F7B786
F7GTQ0
G7PUB9
G7PRG1
P81605
P07737
P29373
Q01469
Q8I030
O19093
Q14697
P01040
P27482
Q1KLX0
Q5R9M3
P47929
P61561
P06768
O77523
P25445
G7PUP9
G7PQY2
G7PID3
G7PUS5
G7PQY3
G7PIC8
G7PID4
G7P2N0
G7PHX5
G8F2G9
G7P5L7
G7NY31
G7NUG4
G7P7Z2
G7PT41
G7P2N4
G7PGL4
G7PUF6
G7PTX9
G7PWZ9
G7NZC8
P05109
P04259
Q95M66
A0SXL6
P06703
P35754
P54652
F6TDW8
F7H2F8
F6QAX2
Q6S8J3
G7PJP0
F6RSN8
F6TII3
Q8TDL5
F7E526
F6THR5
F7BHR1
F6VD19
F7HHU1
A2V9Z4
F7H312
F7DPX1
F7C3R1

## Sheet: Signal P
SignalP-4.1 euk prediction	s
# name	Cmax	pos	Ymax	pos	Smax	pos	Smean	D	?	Dmaxcut	Networks-used
sp_P11021_BIP_HUMAN	0.832	19	0.876	19	0.953	15	0.917	0.898	Y	0.45	SignalP-noTM
sp_P80303_NUCB2_HUMAN	0.612	25	0.76	25	0.991	16	0.943	0.859	Y	0.45	SignalP-noTM
sp_P22079_PERL_HUMAN	0.616	27	0.71	27	0.985	12	0.841	0.781	Y	0.45	SignalP-noTM
sp_P02788_TRFL_HUMAN	0.84	20	0.903	20	0.991	11	0.97	0.939	Y	0.45	SignalP-noTM
sp_Q02818_NUCB1_HUMAN	0.912	27	0.936	27	0.995	19	0.957	0.948	Y	0.45	SignalP-noTM
sp_A5A6I6_TRFE_PANTR	0.855	20	0.906	20	0.985	12	0.958	0.934	Y	0.45	SignalP-noTM
sp_Q96HE7_ERO1A_HUMAN	0.73	24	0.818	24	0.974	14	0.918	0.872	Y	0.45	SignalP-noTM
sp_P14314_GLU2B_HUMAN	0.579	15	0.728	15	0.945	7	0.908	0.825	Y	0.45	SignalP-noTM
sp_P07602_SAP_HUMAN	0.861	17	0.915	17	0.985	10	0.972	0.946	Y	0.45	SignalP-noTM
sp_P01024_CO3_HUMAN	0.884	23	0.898	23	0.95	7	0.912	0.905	Y	0.45	SignalP-noTM
sp_Q13217_DNJC3_HUMAN	0.244	32	0.403	32	0.899	19	0.684	0.555	Y	0.45	SignalP-noTM
sp_P06396_GELS_HUMAN	0.591	28	0.742	28	0.977	17	0.931	0.844	Y	0.45	SignalP-noTM
sp_P04196_HRG_HUMAN	0.817	19	0.877	19	0.967	12	0.939	0.91	Y	0.45	SignalP-noTM
sp_P49257_LMAN1_HUMAN	0.734	31	0.762	31	0.928	4	0.809	0.787	Y	0.45	SignalP-noTM
sp_H2N4I1_QSOX1_PONAB	0.907	33	0.936	33	0.995	21	0.958	0.948	Y	0.45	SignalP-noTM									Signal P	Secretome P	No Signal P
sp_P01008_ANT3_HUMAN	0.585	35	0.642	35	0.874	27	0.585	0.611	Y	0.45	SignalP-noTM								Soluble	42	10	89
sp_P10909_CLUS_HUMAN	0.755	23	0.81	23	0.971	2	0.869	0.842	Y	0.45	SignalP-noTM								TMHMM	13	0	5
sp_P0C0L4_CO4A_HUMAN	0.425	20	0.601	20	0.9	1	0.842	0.731	Y	0.45	SignalP-noTM
sp_Q4R4T8_LGMN_MACFA	0.438	18	0.621	18	0.933	10	0.883	0.762	Y	0.45	SignalP-noTM					(transmembrane segments )TM
tr_G7MVY8_G7MVY8_MACMU	0.427	27	0.593	27	0.986	12	0.845	0.729	Y	0.45	SignalP-noTM			Signal P	42	13
tr_F7FMQ2_F7FMQ2_MACMU	0.793	18	0.865	18	0.976	10	0.938	0.904	Y	0.45	SignalP-noTM			Secretome P	9	1
tr_F7EZT6_F7EZT6_MACMU	0.899	22	0.91	22	0.972	12	0.919	0.915	Y	0.45	SignalP-noTM			No signal	89	5
tr_F6W5A7_F6W5A7_MACMU	0.705	20	0.821	20	0.977	9	0.953	0.892	Y	0.45	SignalP-noTM
tr_F7BCV3_F7BCV3_MACMU	0.596	34	0.547	34	0.776	5	0.528	0.536	Y	0.45	SignalP-noTM
sp_Q9H173_SIL1_HUMAN	0.608	32	0.718	32	0.967	13	0.853	0.791	Y	0.45	SignalP-noTM
sp_P50417_HPT_ATEGE	0.693	19	0.807	19	0.971	13	0.941	0.879	Y	0.45	SignalP-noTM
sp_P23280_CAH6_HUMAN	0.808	18	0.877	18	0.976	10	0.947	0.914	Y	0.45	SignalP-noTM
sp_P07858_CATB_HUMAN	0.62	18	0.754	18	0.956	15	0.916	0.841	Y	0.45	SignalP-noTM
sp_P24855_DNAS1_HUMAN	0.796	23	0.869	23	0.989	14	0.948	0.912	Y	0.45	SignalP-noTM
sp_Q92820_GGH_HUMAN	0.527	21	0.701	21	0.967	4	0.934	0.827	Y	0.45	SignalP-noTM
sp_P07996_TSP1_HUMAN	0.456	19	0.621	19	0.893	17	0.845	0.742	Y	0.45	SignalP-noTM
sp_O00584_RNT2_HUMAN	0.357	25	0.57	25	0.975	6	0.914	0.755	Y	0.45	SignalP-noTM
sp_P28325_CYTD_HUMAN	0.593	26	0.725	26	0.986	14	0.893	0.816	Y	0.45	SignalP-noTM
sp_Q16769_QPCT_HUMAN	0.565	29	0.724	29	0.986	19	0.923	0.832	Y	0.45	SignalP-noTM
sp_Q9NQX5_NPDC1_HUMAN	0.773	35	0.814	35	0.96	26	0.85	0.833	Y	0.45	SignalP-noTM
tr_F7GTQ0_F7GTQ0_MACMU	0.564	29	0.713	29	0.976	19	0.891	0.809	Y	0.45	SignalP-noTM
tr_G7PRG1_G7PRG1_MACFA	0.686	21	0.799	21	0.979	11	0.927	0.868	Y	0.45	SignalP-noTM
sp_P81605_DCD_HUMAN	0.707	20	0.822	20	0.987	11	0.953	0.893	Y	0.45	SignalP-noTM
sp_O19093_CYTC_SAISC	0.724	21	0.834	21	0.987	15	0.963	0.903	Y	0.45	SignalP-noTM
sp_Q14697_GANAB_HUMAN	0.541	33	0.579	33	0.821	28	0.542	0.564	Y	0.5	SignalP-TM
sp_Q1KLX0_CAMP_SAGOE	0.392	35	0.436	31	0.798	3	0.612	0.507	Y	0.5	SignalP-TM
sp_P61561_SYCY1_GORGO	0.527	21	0.694	21	0.958	13	0.916	0.814	Y	0.45	SignalP-noTM
sp_O77523_B2MG_ALOSE	0.7	21	0.811	21	0.968	12	0.938	0.88	Y	0.45	SignalP-noTM
sp_P25445_TNR6_HUMAN	0.318	26	0.467	26	0.958	11	0.716	0.602	Y	0.45	SignalP-noTM
tr_G7PHX5_G7PHX5_MACFA	0.698	20	0.817	20	0.987	11	0.954	0.891	Y	0.45	SignalP-noTM
tr_G7P5L7_G7P5L7_MACFA	0.713	19	0.8	19	0.931	2	0.893	0.85	Y	0.45	SignalP-noTM
tr_G7NY31_G7NY31_MACFA	0.862	20	0.914	20	0.989	11	0.967	0.943	Y	0.45	SignalP-noTM
tr_G7PGL4_G7PGL4_MACFA	0.614	22	0.766	22	0.987	15	0.958	0.87	Y	0.45	SignalP-noTM
tr_G7PUF6_G7PUF6_MACFA	0.479	27	0.628	27	0.983	12	0.846	0.746	Y	0.45	SignalP-noTM
sp_Q95M66_DEFB1_SAGOE	0.443	22	0.632	22	0.971	2	0.898	0.776	Y	0.45	SignalP-noTM
tr_F7H2F8_F7H2F8_MACMU	0.45	33	0.614	33	0.943	20	0.827	0.729	Y	0.45	SignalP-noTM
sp_Q8TDL5_BPIB1_HUMAN	0.588	22	0.673	22	0.896	8	0.801	0.724	Y	0.5	SignalP-TM
tr_F6VD19_F6VD19_MACMU	0.244	32	0.403	32	0.899	19	0.684	0.555	Y	0.45	SignalP-noTM
sp_A2V9Z4_ALBU_MACFA	0.713	19	0.8	19	0.931	2	0.893	0.85	Y	0.45	SignalP-noTM
tr_F7C3R1_F7C3R1_MACMU	0.832	19	0.876	19	0.953	15	0.917	0.898	Y	0.45	SignalP-noTM
sp_P35527_K1C9_HUMAN	0.111	64	0.109	14	0.13	2	0.11	0.109	N	0.45	SignalP-noTM
sp_P13645_K1C10_HUMAN	0.11	48	0.104	26	0.111	14	0.098	0.101	N	0.45	SignalP-noTM
sp_P04264_K2C1_HUMAN	0.108	33	0.109	12	0.145	2	0.113	0.111	N	0.45	SignalP-noTM
sp_Q2I6W4_CATA_CALJA	0.109	51	0.109	28	0.135	12	0.109	0.109	N	0.45	SignalP-noTM
sp_P06733_ENOA_HUMAN	0.114	17	0.113	17	0.131	5	0.115	0.114	N	0.45	SignalP-noTM
sp_Q5R7D3_HSP71_PONAB	0.137	17	0.172	17	0.333	1	0.172	0.172	N	0.45	SignalP-noTM
sp_P02538_K2C6A_HUMAN	0.111	65	0.109	19	0.13	3	0.113	0.112	N	0.45	SignalP-noTM
sp_Q5R1W6_TKT_PANTR	0.14	45	0.128	45	0.163	32	0.108	0.117	N	0.45	SignalP-noTM
sp_P35908_K22E_HUMAN	0.11	46	0.118	13	0.177	11	0.142	0.131	N	0.45	SignalP-noTM
sp_P13796_PLSL_HUMAN	0.11	20	0.106	11	0.116	1	0.097	0.101	N	0.45	SignalP-noTM
sp_P13646_K1C13_HUMAN	0.118	22	0.126	22	0.176	3	0.132	0.129	N	0.45	SignalP-noTM
sp_P06744_G6PI_HUMAN	0.11	32	0.106	29	0.117	21	0.101	0.103	N	0.45	SignalP-noTM
sp_P02533_K1C14_HUMAN	0.122	48	0.118	11	0.156	1	0.124	0.121	N	0.45	SignalP-noTM
sp_P30838_AL3A1_HUMAN	0.11	69	0.114	13	0.155	13	0.124	0.12	N	0.45	SignalP-noTM
sp_Q6ZN66_GBP6_HUMAN	0.136	53	0.119	53	0.156	3	0.102	0.11	N	0.45	SignalP-noTM
sp_P15144_AMPN_HUMAN	0.22	35	0.237	23	0.553	6	0.351	0.283	N	0.5	SignalP-TM
sp_P19013_K2C4_HUMAN	0.117	32	0.135	11	0.203	1	0.155	0.146	N	0.45	SignalP-noTM
sp_O75083_WDR1_HUMAN	0.183	52	0.131	52	0.13	17	0.098	0.113	N	0.45	SignalP-noTM
sp_P31939_PUR9_HUMAN	0.154	41	0.151	41	0.238	34	0.145	0.148	N	0.45	SignalP-noTM
sp_P15311_EZRI_HUMAN	0.112	68	0.113	11	0.133	1	0.107	0.11	N	0.45	SignalP-noTM
sp_P43251_BTD_HUMAN	0.149	42	0.241	42	0.496	39	0.322	0.273	N	0.5	SignalP-TM
sp_P01871_IGHM_HUMAN	0.125	15	0.132	15	0.171	14	0.137	0.135	N	0.45	SignalP-noTM
sp_Q6IE36_OVOS2_HUMAN	0.189	32	0.193	32	0.47	21	0.214	0.204	N	0.45	SignalP-noTM
sp_Q9UBG3_CRNN_HUMAN	0.122	22	0.118	22	0.138	13	0.113	0.116	N	0.45	SignalP-noTM
sp_P14923_PLAK_HUMAN	0.129	40	0.112	40	0.107	51	0.096	0.103	N	0.45	SignalP-noTM
tr_F7HCH2_F7HCH2_MACMU	0.127	38	0.137	15	0.264	11	0.158	0.148	N	0.45	SignalP-noTM
tr_F6RLH5_F6RLH5_MACMU	0.108	47	0.134	11	0.204	1	0.137	0.136	N	0.45	SignalP-noTM
tr_F7F0E8_F7F0E8_MACMU	0.121	8	0.117	56	0.168	47	0.116	0.116	N	0.45	SignalP-noTM
tr_F6RRV0_F6RRV0_MACMU	0.134	50	0.117	50	0.162	46	0.097	0.106	N	0.45	SignalP-noTM
tr_F7GYM9_F7GYM9_MACMU	0.106	40	0.103	69	0.11	55	0.095	0.099	N	0.45	SignalP-noTM
tr_F7H193_F7H193_MACMU	0.116	20	0.111	20	0.119	2	0.107	0.109	N	0.45	SignalP-noTM
tr_F7C1B5_F7C1B5_MACMU	0.107	63	0.115	13	0.153	7	0.13	0.123	N	0.45	SignalP-noTM
tr_F7H7V0_F7H7V0_MACMU	0.129	40	0.112	40	0.107	51	0.096	0.103	N	0.45	SignalP-noTM
sp_P13647_K2C5_HUMAN	0.114	23	0.126	11	0.196	2	0.138	0.132	N	0.45	SignalP-noTM
sp_P30740_ILEU_HUMAN	0.207	41	0.198	11	0.462	1	0.26	0.232	N	0.45	SignalP-noTM
sp_B1MTB7_SPB5_PLEMO	0.165	23	0.156	47	0.283	44	0.159	0.157	N	0.45	SignalP-noTM
sp_O43813_LANC1_HUMAN	0.108	22	0.103	69	0.106	54	0.098	0.1	N	0.45	SignalP-noTM
sp_A5A6I5_ALDOA_PANTR	0.108	65	0.104	65	0.108	60	0.097	0.1	N	0.45	SignalP-noTM
sp_P40394_ADH7_HUMAN	0.11	57	0.109	23	0.145	9	0.108	0.109	N	0.45	SignalP-noTM
sp_P40926_MDHM_HUMAN	0.138	12	0.173	12	0.259	1	0.175	0.174	N	0.45	SignalP-noTM
sp_P06753_TPM3_HUMAN	0.109	45	0.111	45	0.124	34	0.103	0.107	N	0.45	SignalP-noTM
sp_P07951_TPM2_HUMAN	0.106	25	0.109	44	0.121	33	0.103	0.106	N	0.45	SignalP-noTM
sp_O60218_AK1BA_HUMAN	0.111	46	0.117	20	0.145	1	0.123	0.12	N	0.45	SignalP-noTM
sp_Q5T2L2_AKCL1_HUMAN	0.13	38	0.116	38	0.148	3	0.106	0.111	N	0.45	SignalP-noTM
sp_A5A6N7_LDHB_PANTR	0.243	47	0.167	47	0.18	42	0.111	0.136	N	0.45	SignalP-noTM
sp_Q6DTV9_PPIA_AOTTR	0.115	23	0.11	23	0.12	20	0.105	0.107	N	0.45	SignalP-noTM
sp_P23284_PPIB_HUMAN	0.727	34	0.533	34	0.635	32	0.379	0.472	N	0.5	SignalP-TM
sp_Q5JXB2_UE2NL_HUMAN	0.165	26	0.126	26	0.116	3	0.097	0.11	N	0.45	SignalP-noTM
sp_Q96DA0_ZG16B_HUMAN	0.596	53	0.469	53	0.485	46	0.237	0.376	N	0.5	SignalP-TM
sp_Q7RTS7_K2C74_HUMAN	0.117	43	0.112	43	0.137	37	0.105	0.108	N	0.45	SignalP-noTM
sp_P04406_G3P_HUMAN	0.12	55	0.128	14	0.199	3	0.149	0.14	N	0.45	SignalP-noTM
tr_F7B786_F7B786_MACMU	0.109	58	0.109	12	0.146	2	0.114	0.112	N	0.45	SignalP-noTM
tr_G7PUB9_G7PUB9_MACFA	0.154	27	0.179	11	0.355	1	0.269	0.227	N	0.45	SignalP-noTM
sp_P07737_PROF1_HUMAN	0.131	34	0.12	34	0.142	2	0.115	0.117	N	0.45	SignalP-noTM
sp_P29373_RABP2_HUMAN	0.156	38	0.166	38	0.359	35	0.169	0.168	N	0.45	SignalP-noTM
sp_Q01469_FABP5_HUMAN	0.154	17	0.125	17	0.129	12	0.099	0.111	N	0.45	SignalP-noTM
sp_Q8I030_CYTB_PANTR	0.13	17	0.108	51	0.118	28	0.097	0.102	N	0.45	SignalP-noTM
sp_P01040_CYTA_HUMAN	0.111	60	0.104	39	0.113	7	0.097	0.1	N	0.45	SignalP-noTM
sp_P27482_CALL3_HUMAN	0.109	48	0.106	68	0.118	47	0.096	0.101	N	0.45	SignalP-noTM
sp_Q5R9M3_THIO_PONAB	0.121	38	0.11	38	0.143	49	0.101	0.106	N	0.45	SignalP-noTM
sp_P47929_LEG7_HUMAN	0.113	48	0.112	13	0.162	6	0.12	0.117	N	0.45	SignalP-noTM
sp_P06768_RET2_RAT	0.107	25	0.105	25	0.114	10	0.102	0.104	N	0.45	SignalP-noTM
tr_G7PUP9_G7PUP9_MACFA	0.109	43	0.102	43	0.105	9	0.095	0.098	N	0.45	SignalP-noTM
tr_G7PQY2_G7PQY2_MACFA	0.161	27	0.128	27	0.115	53	0.102	0.114	N	0.45	SignalP-noTM
tr_G7PID3_G7PID3_MACFA	0.11	46	0.118	13	0.175	11	0.141	0.13	N	0.45	SignalP-noTM
tr_G7PUS5_G7PUS5_MACFA	0.122	48	0.117	11	0.155	1	0.124	0.121	N	0.45	SignalP-noTM
tr_G7PQY3_G7PQY3_MACFA	0.132	27	0.114	27	0.125	26	0.098	0.105	N	0.45	SignalP-noTM
tr_G7PIC8_G7PIC8_MACFA	0.111	65	0.113	19	0.146	3	0.119	0.116	N	0.45	SignalP-noTM
tr_G7PID4_G7PID4_MACFA	0.112	53	0.108	21	0.134	3	0.108	0.108	N	0.45	SignalP-noTM
tr_G7P2N0_G7P2N0_MACFA	0.11	29	0.102	41	0.119	3	0.096	0.099	N	0.45	SignalP-noTM
tr_G8F2G9_G8F2G9_MACFA	0.108	12	0.104	39	0.114	22	0.101	0.102	N	0.45	SignalP-noTM
tr_G7NUG4_G7NUG4_MACFA	0.217	22	0.202	22	0.299	20	0.182	0.191	N	0.45	SignalP-noTM
tr_G7P7Z2_G7P7Z2_MACFA	0.135	30	0.117	30	0.143	28	0.105	0.111	N	0.45	SignalP-noTM
tr_G7PT41_G7PT41_MACFA	0.119	23	0.113	23	0.125	19	0.107	0.11	N	0.45	SignalP-noTM
tr_G7P2N4_G7P2N4_MACFA	0.122	16	0.109	16	0.116	50	0.094	0.101	N	0.45	SignalP-noTM
tr_G7PTX9_G7PTX9_MACFA	0.109	27	0.114	58	0.141	43	0.107	0.11	N	0.45	SignalP-noTM
tr_G7PWZ9_G7PWZ9_MACFA	0.108	20	0.116	20	0.16	7	0.126	0.121	N	0.45	SignalP-noTM
tr_G7NZC8_G7NZC8_MACFA	0.152	22	0.132	22	0.151	18	0.115	0.122	N	0.45	SignalP-noTM
sp_P05109_S10A8_HUMAN	0.111	32	0.105	70	0.112	51	0.096	0.1	N	0.45	SignalP-noTM
sp_P04259_K2C6B_HUMAN	0.111	65	0.109	19	0.13	3	0.113	0.111	N	0.45	SignalP-noTM
sp_A0SXL6_EF2_CALJA	0.139	52	0.12	52	0.14	50	0.1	0.109	N	0.45	SignalP-noTM
sp_P06703_S10A6_HUMAN	0.217	22	0.202	22	0.299	20	0.182	0.191	N	0.45	SignalP-noTM
sp_P35754_GLRX1_HUMAN	0.135	30	0.118	30	0.135	28	0.106	0.111	N	0.45	SignalP-noTM
sp_P54652_HSP72_HUMAN	0.111	18	0.144	11	0.272	2	0.167	0.157	N	0.45	SignalP-noTM
tr_F6TDW8_F6TDW8_MACMU	0.111	67	0.112	17	0.187	11	0.125	0.119	N	0.45	SignalP-noTM
tr_F6QAX2_F6QAX2_MACMU	0.113	62	0.104	62	0.119	5	0.098	0.101	N	0.45	SignalP-noTM
sp_Q6S8J3_POTEE_HUMAN	0.11	19	0.111	19	0.187	13	0.115	0.114	N	0.45	SignalP-noTM
tr_G7PJP0_G7PJP0_MACFA	0.12	9	0.11	17	0.135	11	0.113	0.112	N	0.45	SignalP-noTM
tr_F6RSN8_F6RSN8_MACMU	0.338	33	0.309	20	0.56	6	0.394	0.355	N	0.45	SignalP-noTM
tr_F6TII3_F6TII3_MACMU	0.119	23	0.113	23	0.125	19	0.107	0.11	N	0.45	SignalP-noTM
tr_F7E526_F7E526_MACMU	0.111	65	0.113	19	0.146	3	0.119	0.116	N	0.45	SignalP-noTM
tr_I0FJ64_I0FJ64_MACMU	0.14	45	0.128	45	0.164	32	0.109	0.118	N	0.45	SignalP-noTM
tr_F7H312_F7H312_MACMU	0.122	48	0.117	11	0.155	1	0.124	0.121	N	0.45	SignalP-noTM
tr_F7DPX1_F7DPX1_MACMU	0.132	17	0.145	17	0.362	35	0.171	0.159	N	0.45	SignalP-noTM

## Sheet: TMHMM
sp|P11021|BIP_HUMAN	len=654	ExpAA=0.00	First60=0.00	PredHel=0	Topology=o
sp|P35527|K1C9_HUMAN	len=623	ExpAA=1.06	First60=0.02	PredHel=0	Topology=o
sp|P80303|NUCB2_HUMAN	len=420	ExpAA=18.91	First60=18.91	PredHel=1	Topology=i5-27o
sp|P13645|K1C10_HUMAN	len=584	ExpAA=8.42	First60=0.19	PredHel=0	Topology=o
sp|P04264|K2C1_HUMAN	len=644	ExpAA=7.65	First60=0.36	PredHel=0	Topology=o
sp|P22079|PERL_HUMAN	len=712	ExpAA=1.09	First60=1.09	PredHel=0	Topology=o
sp|Q2I6W4|CATA_CALJA	len=527	ExpAA=0.01	First60=0.00	PredHel=0	Topology=o
sp|P06733|ENOA_HUMAN	len=434	ExpAA=0.06	First60=0.00	PredHel=0	Topology=o
sp|Q5R7D3|HSP71_PONAB	len=641	ExpAA=0.28	First60=0.05	PredHel=0	Topology=o
sp|P02538|K2C6A_HUMAN	len=564	ExpAA=18.69	First60=0.09	PredHel=0	Topology=o
sp|Q5R1W6|TKT_PANTR	len=623	ExpAA=0.61	First60=0.23	PredHel=0	Topology=o
sp|P35908|K22E_HUMAN	len=639	ExpAA=4.70	First60=0.17	PredHel=0	Topology=o
sp|P02788|TRFL_HUMAN	len=710	ExpAA=2.21	First60=2.21	PredHel=0	Topology=o
sp|Q02818|NUCB1_HUMAN	len=461	ExpAA=10.05	First60=10.05	PredHel=0	Topology=o
sp|P13796|PLSL_HUMAN	len=627	ExpAA=0.03	First60=0.00	PredHel=0	Topology=o
sp|A5A6I6|TRFE_PANTR	len=698	ExpAA=1.52	First60=1.51	PredHel=0	Topology=o
sp|Q96HE7|ERO1A_HUMAN	len=468	ExpAA=0.43	First60=0.43	PredHel=0	Topology=o
sp|P13646|K1C13_HUMAN	len=458	ExpAA=7.28	First60=3.24	PredHel=0	Topology=o
sp|P06744|G6PI_HUMAN	len=558	ExpAA=1.09	First60=0.00	PredHel=0	Topology=o
sp|P14314|GLU2B_HUMAN	len=528	ExpAA=0.00	First60=0.00	PredHel=0	Topology=o
sp|P02533|K1C14_HUMAN	len=472	ExpAA=4.16	First60=0.11	PredHel=0	Topology=o
sp|P30838|AL3A1_HUMAN	len=453	ExpAA=0.57	First60=0.00	PredHel=0	Topology=o
sp|Q6ZN66|GBP6_HUMAN	len=633	ExpAA=0.61	First60=0.09	PredHel=0	Topology=o
sp|P07602|SAP_HUMAN	len=524	ExpAA=4.33	First60=4.33	PredHel=0	Topology=o
sp|P15144|AMPN_HUMAN	len=967	ExpAA=22.50	First60=22.41	PredHel=1	Topology=i12-34o
sp|P01024|CO3_HUMAN	len=1663	ExpAA=8.21	First60=8.15	PredHel=0	Topology=o
sp|Q13217|DNJC3_HUMAN	len=504	ExpAA=0.13	First60=0.13	PredHel=0	Topology=o
sp|P06396|GELS_HUMAN	len=782	ExpAA=5.99	First60=5.99	PredHel=0	Topology=o
sp|P19013|K2C4_HUMAN	len=534	ExpAA=20.89	First60=0.01	PredHel=1	Topology=i72-94o
sp|O75083|WDR1_HUMAN	len=606	ExpAA=0.72	First60=0.00	PredHel=0	Topology=o
sp|P31939|PUR9_HUMAN	len=592	ExpAA=0.01	First60=0.01	PredHel=0	Topology=o
sp|P15311|EZRI_HUMAN	len=586	ExpAA=0.00	First60=0.00	PredHel=0	Topology=o
sp|P04196|HRG_HUMAN	len=525	ExpAA=0.01	First60=0.01	PredHel=0	Topology=o
sp|P49257|LMAN1_HUMAN	len=510	ExpAA=22.03	First60=0.33	PredHel=1	Topology=o476-498i
sp|H2N4I1|QSOX1_PONAB	len=750	ExpAA=43.15	First60=20.83	PredHel=2	Topology=i13-32o710-732i
sp|P01008|ANT3_HUMAN	len=464	ExpAA=2.89	First60=2.73	PredHel=0	Topology=o
sp|P43251|BTD_HUMAN	len=543	ExpAA=4.94	First60=3.98	PredHel=0	Topology=o
sp|P10909|CLUS_HUMAN	len=449	ExpAA=0.05	First60=0.05	PredHel=0	Topology=o
sp|P0C0L4|CO4A_HUMAN	len=1744	ExpAA=0.34	First60=0.29	PredHel=0	Topology=o
sp|P01871|IGHM_HUMAN	len=453	ExpAA=0.00	First60=0.00	PredHel=0	Topology=o
sp|Q6IE36|OVOS2_HUMAN	len=1432	ExpAA=0.13	First60=0.00	PredHel=0	Topology=o
sp|Q9UBG3|CRNN_HUMAN	len=495	ExpAA=0.00	First60=0.00	PredHel=0	Topology=o
sp|P14923|PLAK_HUMAN	len=745	ExpAA=0.03	First60=0.00	PredHel=0	Topology=o
sp|Q4R4T8|LGMN_MACFA	len=433	ExpAA=0.25	First60=0.25	PredHel=0	Topology=o
tr|G7MVY8|G7MVY8_MACMU	len=794	ExpAA=37.86	First60=15.21	PredHel=2	Topology=i5-22o716-738i
tr|F7HCH2|F7HCH2_MACMU	len=588	ExpAA=0.00	First60=0.00	PredHel=0	Topology=o
tr|F6RLH5|F6RLH5_MACMU	len=642	ExpAA=0.04	First60=0.01	PredHel=0	Topology=o
tr|F7F0E8|F7F0E8_MACMU	len=516	ExpAA=0.01	First60=0.00	PredHel=0	Topology=o
tr|F6RRV0|F6RRV0_MACMU	len=589	ExpAA=0.01	First60=0.00	PredHel=0	Topology=o
tr|F7GYM9|F7GYM9_MACMU	len=636	ExpAA=0.04	First60=0.00	PredHel=0	Topology=o
tr|F7FMQ2|F7FMQ2_MACMU	len=407	ExpAA=0.65	First60=0.65	PredHel=0	Topology=o
tr|F7H193|F7H193_MACMU	len=608	ExpAA=0.11	First60=0.00	PredHel=0	Topology=o
tr|F7EZT6|F7EZT6_MACMU	len=802	ExpAA=0.29	First60=0.28	PredHel=0	Topology=o
tr|F7C1B5|F7C1B5_MACMU	len=485	ExpAA=40.85	First60=0.00	PredHel=2	Topology=i102-124o464-483i
tr|F7H7V0|F7H7V0_MACMU	len=745	ExpAA=0.03	First60=0.00	PredHel=0	Topology=o
tr|F6W5A7|F6W5A7_MACMU	len=707	ExpAA=0.28	First60=0.27	PredHel=0	Topology=o
tr|F7BCV3|F7BCV3_MACMU	len=457	ExpAA=1.16	First60=1.16	PredHel=0	Topology=o
sp|P13647|K2C5_HUMAN	len=590	ExpAA=15.02	First60=0.76	PredHel=0	Topology=o
sp|Q9H173|SIL1_HUMAN	len=461	ExpAA=17.93	First60=17.91	PredHel=1	Topology=i13-35o
sp|P30740|ILEU_HUMAN	len=379	ExpAA=3.71	First60=3.64	PredHel=0	Topology=o
sp|B1MTB7|SPB5_PLEMO	len=375	ExpAA=0.08	First60=0.08	PredHel=0	Topology=o
sp|P50417|HPT_ATEGE	len=347	ExpAA=0.25	First60=0.25	PredHel=0	Topology=o
sp|O43813|LANC1_HUMAN	len=399	ExpAA=6.15	First60=0.06	PredHel=0	Topology=o
sp|A5A6I5|ALDOA_PANTR	len=364	ExpAA=0.00	First60=0.00	PredHel=0	Topology=o
sp|P40394|ADH7_HUMAN	len=386	ExpAA=1.18	First60=0.00	PredHel=0	Topology=o
sp|P23280|CAH6_HUMAN	len=308	ExpAA=0.04	First60=0.03	PredHel=0	Topology=o
sp|P07858|CATB_HUMAN	len=339	ExpAA=0.02	First60=0.02	PredHel=0	Topology=o
sp|P40926|MDHM_HUMAN	len=338	ExpAA=0.08	First60=0.04	PredHel=0	Topology=o
sp|P06753|TPM3_HUMAN	len=285	ExpAA=0.00	First60=0.00	PredHel=0	Topology=o
sp|P07951|TPM2_HUMAN	len=284	ExpAA=0.00	First60=0.00	PredHel=0	Topology=o
sp|P24855|DNAS1_HUMAN	len=282	ExpAA=16.61	First60=16.58	PredHel=1	Topology=i7-29o
sp|Q92820|GGH_HUMAN	len=318	ExpAA=3.19	First60=3.09	PredHel=0	Topology=o
sp|P07996|TSP1_HUMAN	len=1170	ExpAA=0.06	First60=0.05	PredHel=0	Topology=o
sp|O60218|AK1BA_HUMAN	len=316	ExpAA=0.00	First60=0.00	PredHel=0	Topology=o
sp|Q5T2L2|AKCL1_HUMAN	len=129	ExpAA=0.02	First60=0.00	PredHel=0	Topology=o
sp|O00584|RNT2_HUMAN	len=256	ExpAA=8.19	First60=8.19	PredHel=0	Topology=o
sp|A5A6N7|LDHB_PANTR	len=334	ExpAA=0.28	First60=0.24	PredHel=0	Topology=o
sp|Q6DTV9|PPIA_AOTTR	len=164	ExpAA=0.00	First60=0.00	PredHel=0	Topology=o
sp|P23284|PPIB_HUMAN	len=216	ExpAA=20.43	First60=20.33	PredHel=1	Topology=i11-33o
sp|P28325|CYTD_HUMAN	len=142	ExpAA=13.59	First60=10.15	PredHel=0	Topology=o
sp|Q16769|QPCT_HUMAN	len=361	ExpAA=4.36	First60=4.29	PredHel=0	Topology=o
sp|Q9NQX5|NPDC1_HUMAN	len=325	ExpAA=27.75	First60=5.11	PredHel=1	Topology=o182-204i
sp|Q5JXB2|UE2NL_HUMAN	len=153	ExpAA=0.00	First60=0.00	PredHel=0	Topology=o
sp|Q96DA0|ZG16B_HUMAN	len=208	ExpAA=3.15	First60=2.74	PredHel=0	Topology=o
sp|Q7RTS7|K2C74_HUMAN	len=529	ExpAA=0.29	First60=0.07	PredHel=0	Topology=o
sp|P04406|G3P_HUMAN	len=335	ExpAA=0.05	First60=0.04	PredHel=0	Topology=o
tr|F7B786|F7B786_MACMU	len=636	ExpAA=10.41	First60=0.63	PredHel=0	Topology=o
tr|F7GTQ0|F7GTQ0_MACMU	len=361	ExpAA=2.41	First60=2.37	PredHel=0	Topology=o
tr|G7PUB9|G7PUB9_MACFA	len=174	ExpAA=0.19	First60=0.00	PredHel=0	Topology=o
tr|G7PRG1|G7PRG1_MACFA	len=200	ExpAA=0.07	First60=0.07	PredHel=0	Topology=o
sp|P81605|DCD_HUMAN	len=110	ExpAA=0.23	First60=0.23	PredHel=0	Topology=o
sp|P07737|PROF1_HUMAN	len=140	ExpAA=0.29	First60=0.29	PredHel=0	Topology=o
sp|P29373|RABP2_HUMAN	len=138	ExpAA=0.00	First60=0.00	PredHel=0	Topology=o
sp|Q01469|FABP5_HUMAN	len=135	ExpAA=0.00	First60=0.00	PredHel=0	Topology=o
sp|Q8I030|CYTB_PANTR	len=98	ExpAA=0.01	First60=0.01	PredHel=0	Topology=o
sp|O19093|CYTC_SAISC	len=146	ExpAA=20.55	First60=20.54	PredHel=1	Topology=i7-29o
sp|Q14697|GANAB_HUMAN	len=944	ExpAA=20.11	First60=20.08	PredHel=1	Topology=i13-32o
sp|P01040|CYTA_HUMAN	len=98	ExpAA=0.00	First60=0.00	PredHel=0	Topology=o
sp|P27482|CALL3_HUMAN	len=149	ExpAA=0.00	First60=0.00	PredHel=0	Topology=o
sp|Q1KLX0|CAMP_SAGOE	len=170	ExpAA=22.11	First60=22.11	PredHel=1	Topology=i13-35o
sp|Q5R9M3|THIO_PONAB	len=106	ExpAA=0.00	First60=0.00	PredHel=0	Topology=i
sp|P47929|LEG7_HUMAN	len=136	ExpAA=0.00	First60=0.00	PredHel=0	Topology=o
sp|P61561|SYCY1_GORGO	len=538	ExpAA=59.57	First60=3.36	PredHel=1	Topology=o455-477i
sp|P06768|RET2_RAT	len=134	ExpAA=0.00	First60=0.00	PredHel=0	Topology=i
sp|O77523|B2MG_ALOSE	len=119	ExpAA=4.57	First60=4.57	PredHel=0	Topology=o
sp|P25445|TNR6_HUMAN	len=335	ExpAA=4.70	First60=0.02	PredHel=0	Topology=o
tr|G7PUP9|G7PUP9_MACFA	len=575	ExpAA=4.40	First60=0.07	PredHel=0	Topology=o
tr|G7PQY2|G7PQY2_MACFA	len=147	ExpAA=0.55	First60=0.01	PredHel=0	Topology=o
tr|G7PID3|G7PID3_MACFA	len=641	ExpAA=6.94	First60=0.07	PredHel=0	Topology=o
tr|G7PUS5|G7PUS5_MACFA	len=476	ExpAA=9.60	First60=0.22	PredHel=0	Topology=o
tr|G7PQY3|G7PQY3_MACFA	len=147	ExpAA=0.01	First60=0.00	PredHel=0	Topology=o
tr|G7PIC8|G7PIC8_MACFA	len=564	ExpAA=18.73	First60=0.10	PredHel=0	Topology=o
tr|G7PID4|G7PID4_MACFA	len=580	ExpAA=8.55	First60=0.01	PredHel=0	Topology=o
tr|G7P2N0|G7P2N0_MACFA	len=103	ExpAA=0.00	First60=0.00	PredHel=0	Topology=o
tr|G7PHX5|G7PHX5_MACFA	len=110	ExpAA=0.50	First60=0.50	PredHel=0	Topology=o
tr|G8F2G9|G8F2G9_MACFA	len=248	ExpAA=0.05	First60=0.00	PredHel=0	Topology=o
tr|G7P5L7|G7P5L7_MACFA	len=608	ExpAA=0.45	First60=0.45	PredHel=0	Topology=o
tr|G7NY31|G7NY31_MACFA	len=710	ExpAA=1.64	First60=1.63	PredHel=0	Topology=o
tr|G7NUG4|G7NUG4_MACFA	len=90	ExpAA=0.33	First60=0.03	PredHel=0	Topology=o
tr|G7P7Z2|G7P7Z2_MACFA	len=106	ExpAA=0.00	First60=0.00	PredHel=0	Topology=o
tr|G7PT41|G7PT41_MACFA	len=380	ExpAA=0.67	First60=0.00	PredHel=0	Topology=o
tr|G7P2N4|G7P2N4_MACFA	len=221	ExpAA=0.00	First60=0.00	PredHel=0	Topology=o
tr|G7PGL4|G7PGL4_MACFA	len=485	ExpAA=13.29	First60=13.10	PredHel=0	Topology=o
tr|G7PUF6|G7PUF6_MACFA	len=715	ExpAA=1.66	First60=1.66	PredHel=0	Topology=o
tr|G7PTX9|G7PTX9_MACFA	len=1726	ExpAA=0.00	First60=0.00	PredHel=0	Topology=o
tr|G7PWZ9|G7PWZ9_MACFA	len=113	ExpAA=0.00	First60=0.00	PredHel=0	Topology=o
tr|G7NZC8|G7NZC8_MACFA	len=462	ExpAA=0.07	First60=0.03	PredHel=0	Topology=o
sp|P05109|S10A8_HUMAN	len=93	ExpAA=0.04	First60=0.00	PredHel=0	Topology=o
sp|P04259|K2C6B_HUMAN	len=564	ExpAA=18.68	First60=0.09	PredHel=0	Topology=o
sp|Q95M66|DEFB1_SAGOE	len=68	ExpAA=2.54	First60=2.54	PredHel=0	Topology=o
sp|A0SXL6|EF2_CALJA	len=858	ExpAA=0.16	First60=0.00	PredHel=0	Topology=o
sp|P06703|S10A6_HUMAN	len=90	ExpAA=0.33	First60=0.03	PredHel=0	Topology=o
sp|P35754|GLRX1_HUMAN	len=106	ExpAA=0.00	First60=0.00	PredHel=0	Topology=o
[truncated: 16 more rows]

## Sheet: Secretome P
Secretome P	Proteins above 0.6
[truncated: 10 more rows]
